# Supplementary material for: Modular access to vicinally functionalized allylic (thio)morpholinonates and piperidinonates by substrate-controlled annulation of 1,3-azadienes with hexacyclic anhydrides
Source: Royal Society of Chemistry journal article supplement (doi:10.1039/c6ob01526c), 2016-01-01
Supplement: c6ob01526c1.pdf [file c6ob01526c1.pdf]

Supporting Information for:

Modular access to vicinally functionalized allylic morpholinonates, thiomorpholinonates and piperidinonates by substrate-controlled annulation of 1,3-azadienes with hexacyclic anhydrides

*Hannah Braunstein, Spencer Langevin, Monique Khim, Jonathan Adamson, Katie Hovenkotter, Lindsey Kotlarz, Brandon Mansker and Timothy K. Beng\**

*Department of Chemistry, Central Washington University,  
Ellensburg, WA 98926, USA  
[TimothyB@cwu.edu](mailto:TimothyB@cwu.edu)*

*Contents:*

|                                                                                          |      |
|------------------------------------------------------------------------------------------|------|
| 1. General Experimental Information and Procedures.....                                  | S2   |
| 2. Hexannelation of 1,3-azadienes with diglycolic anhydride.....                         | S5   |
| 3. Hexannelation of 1,3-azadienes with thiodiglycolic anhydride.....                     | S65  |
| 4. Hexannelation of 1,3-azadienes with glutaric- or 2,2-dimethylglutaric anhydride ..... | S76  |
| 5. Epoxidation .....                                                                     | S135 |
| 6. Hydrogenation.....                                                                    | S142 |
| 7. Addition of organolithium nucleophiles .....                                          | S148 |
| 8. Etherification.....                                                                   | S164 |
| 9. Alkynylation .....                                                                    | S170 |
| 10. Vilsmeier-Haack reaction .....                                                       | S173 |
| 11. References.....                                                                      | S177 |

## 2. Experimental Section

All experiments involving air and moisture sensitive reagents such as palladium precatalysts and organolithium reagents were carried out under an inert atmosphere of nitrogen and using freshly distilled solvents. Column chromatography was performed on silica gel (230-400 mesh). Thin-layer chromatography (TLC) was performed using Silicycle Siliaplate<sup>TM</sup> glass backed plates (250  $\mu\text{m}$  thickness, 60 Å porosity, F-254 indicator) and visualized using UV (254 nm) or CAM, *p*-anisaldehyde, or  $\text{KMnO}_4$  stain. Unless otherwise indicated,  $^1\text{H}$ ,  $^{13}\text{C}$ , and DEPT-135 NMR, COSY 45, HMQC, and NOESY spectra were acquired using  $\text{DMSO-d}_6$ ,  $\text{CD}_3\text{OD}$  or  $\text{CDCl}_3$  as solvent at room temperature. Chemical shifts are quoted in parts per million (ppm). HRMS-EI<sup>+</sup> data were obtained using either electrospray ionization (ESI) or electron impact (EI) techniques. High-resolution ESI was obtained on an LTQ-FT (ion trap; analyzed using Excalibur). High resolution EI was obtained on an Autospec (magnetic sector; analyzed using MassLynx).

### General Procedure A: Synthesis of 1,3-azadienes

To a round-bottom flask equipped with a stir bar was added the enal (10 mmol), amine (1 to 1.5 equiv), benzene (50 mL), and anhydrous  $\text{MgSO}_4$  (2 g). The cloudy suspension was allowed to stir at room temperature. After complete consumption of the amine (based on TLC monitoring), the mixture was filtered through and concentrated under reduced pressure to obtain the crude enamine, which was used in the next step without further purification.

**Note:** The azadienes need to be stored in the refrigerator when not used immediately.

### General Procedure B: Reaction of 1,3-azadienes with hexacyclic anhydrides<sup>1</sup>

A 5 mL screw-cap vial was flame-dried, evacuated and flushed with nitrogen. A solution of the 1,3-azadiene (1.0 mL, 0.10 M in freshly distilled toluene) was added to the vial at room temperature followed by the cyclic anhydride (1 to 1.1 equiv). The contents were placed in a pre-heated oil bath thermostatted at the desired temperature (e.g., 90 °C for diglycolic anhydride). After complete consumption of the enal (as judged by TLC and NMR), the mixture/suspension was cooled to room temperature and washed several times with petroleum ether, then concentrated under reduced pressure to afford the crude cycloadducts.

### General Procedure C: Methyl esterification of cycloadducts

To a stirring suspension of the acid (1 mmol), dissolved in DMF (5 mL), and  $K_2CO_3$  (6 equiv) was added methyl iodide (3 equiv) under nitrogen atmosphere. The reaction mixture was stirred for 12 to 18 h (TLC monitoring). After complete conversion, it was diluted with water and extracted with EtOAc (2×20 mL). The combined organic extracts were washed with brine, dried over  $Na_2SO_4$  and concentrated *in vacuo* to give the desired ester.

### General Procedure D: Organolithium addition

To the crude lactamoyl ester (1.0 mmol) dissolved in freshly distilled THF (5 mL), was slowly added butyllithium (2.0 mL, 2.0 M solution in hexanes, 4 equiv) under nitrogen at  $-78\text{ }^{\circ}C$ . After complete consumption of the ester (as indicated by TLC and GC-MS), the mixture quenched by slow addition of *sat.* aq  $NH_4Cl$ . The mixture was diluted with  $Et_2O$ . The layers were separated and the aqueous layer was extracted twice with EtOAc. The combined organic layers were dried over  $Na_2SO_4$  for 30 min, filtered, and concentrated under reduced pressure to give the desired product. Purification: Flash chromatography on silica (pretreated with 1%  $Et_3N$ ) eluting with Hexane/EtOAc (1:2).

### General Procedure E: Catalytic hydrogenation

To a round-bottomed flask equipped with a magnetic stir bar was added EtOAc and 10% Pd/C at room temperature. A solution of the alkene in EtOAc was added. The flask was degassed and placed under an inert atmosphere of nitrogen. After complete addition of the alkene, the nitrogen line was cut off. A balloon of  $H_2$  was attached and the reaction mixture was stirred at r.t. After complete consumption of the allylic lactam (based on GC-MS or TLC monitoring), the mixture was filtered through Celite and concentrated under reduced pressure.

### General Procedure F: Epoxidation

To a 10 mL vial, in a  $0\text{ }^{\circ}C$  bath, equipped with a magnetic stir bar under a  $N_2$  atmosphere, was added the allylic lactam (0.50 mmol) and  $CH_2Cl_2$  (5 mL). *m*-CPBA (1.0 mmol, 2 equiv) was then added in one portion. After being stirred for 16 h, during which time the bath was allowed to expire, the reaction mixture was quenched by the sequential addition of *sat.*  $Na_2S_2O_3(aq)$  solution (5 mL) along with 10% NaOH solution (5 mL). The aqueous layer was extracted with  $CH_2Cl_2$  ( $2 \times 10$  mL). The

organic layers were combined, washed with 10% NaOH ( $2 \times 5$  mL) and then with brine, dried with  $\text{MgSO}_4$ , filtered, and concentrated *in vacuo* to afford the crude epoxide.

#### General Procedure G: Pd-catalyzed etherification

To an oven dried vial equipped with a stir bar was added the crude alcohol, prepared using General Procedure D (1.0 mmol) in hexafluorobenzene (5 mL).  $\text{Pd}(\text{OAc})_2$  (12 mg, 5 mol %),  $\text{Li}_2\text{CO}_3$  (1.5 mmol, 1.5 equiv), and  $\text{PhI}(\text{OAc})_2$  (1.5 mmol, 1.5 equiv) were then added. The contents were then stirred at 100 °C for the indicated length of time prior to cooling to room temperature. The mixture was filtered through a pad of Celite and washed with EtOAc. The filtrate was concentrated under reduced pressure to give the crude product, which was directly subjected to flash column chromatography.

#### General Procedure H: Vilsmeier-Haack reaction<sup>2,3</sup>

To a solution of DMF (6 mmol, 6 equiv) in  $\text{CH}_2\text{Cl}_2$  (5 mL) at 0 °C was added dropwise, phosphorus oxychloride (3 mmol, 3 equiv). The resulting pale yellow mixture was refluxed for 40 min. A solution of the lactam (1 mmol, 1 equiv) in  $\text{CH}_2\text{Cl}_2$  (5 mL) was added slowly under reflux. After complete addition of the lactam, the mixture was cooled to room temperature and stirred for the indicated time period (TLC and LC-MS monitoring was used to follow the extent of the reaction). Upon completion, the mixture was poured into a large flask containing crushed ice. After stirring at rt for 60 min, the layers were separated. Powdered  $\text{K}_2\text{CO}_3$  was added slowly to the mixture and the flask was swirled after each addition (**Caution:** it bubbles vigorously). The addition/swirling was continued until persistent cloudiness was observed. The neutralized/slightly basic mixture was extracted three times with  $\text{CH}_2\text{Cl}_2$  and washed with brine. The combined organic layers were dried over  $\text{Na}_2\text{SO}_4$  for 30 min. The mixture was filtered and concentrated under reduced pressure to give the desired product as an oil.



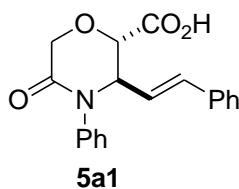

Prepared from imine **4a** (207 mg, 1.0 mmol) and diglycolic anhydride (128 mg, 1.1 equiv), using General Procedure B. T = 90 °C, time = 18 h. An analytical sample was obtained after a series of washes with petroleum ether. <sup>1</sup>H NMR (400 MHz, CDCl<sub>3</sub>) δ 12.86 (1H, s), 7.56 to 7.12 (5H, m), 6.49 to 6.34 (2H, m), 4.90 (1H, d), 4.58 (2H, dd), 4.20 (1H, d). <sup>13</sup>C NMR (101 MHz, CDCl<sub>3</sub>) δ 174.7, 167.6, 140.0, 138.3, 137.4, 136.0, 136.0, 134.8, 134.3, 132.7, 131.9, 130.5, 129.8, 129.8, 129.6, 129.6, 129.4, 129.2, 129.1, 129.0, 128.8, 128.8, 128.4, 127.6, 127.3, 127.2, 125.8, 125.3, 125.1, 121.0, 75.7, 72.1, 69.8, 68.4, 65.3, 64.9, 63.8. **HRMS-EI<sup>+</sup>** (*m/z*): calc'd for C<sub>19</sub>H<sub>17</sub>NO<sub>4</sub> 323.1158; found 323.1163.

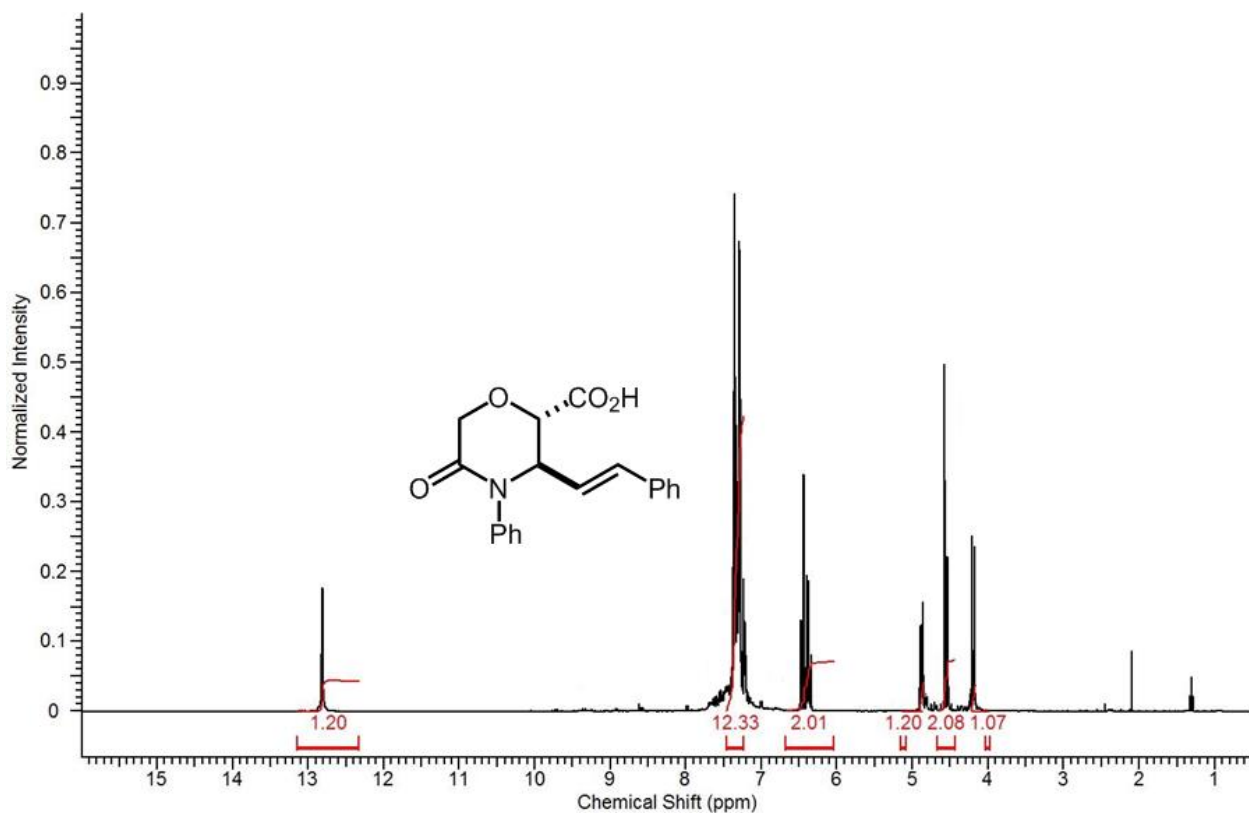

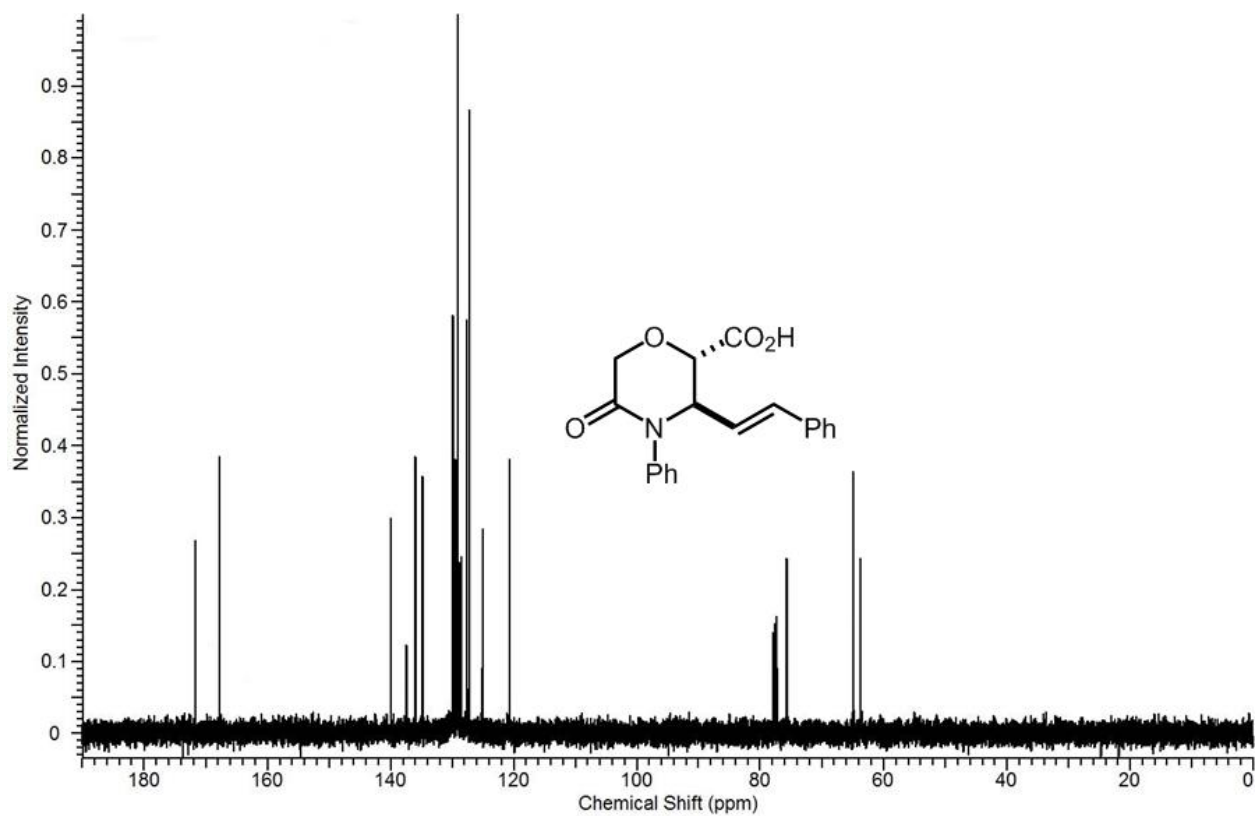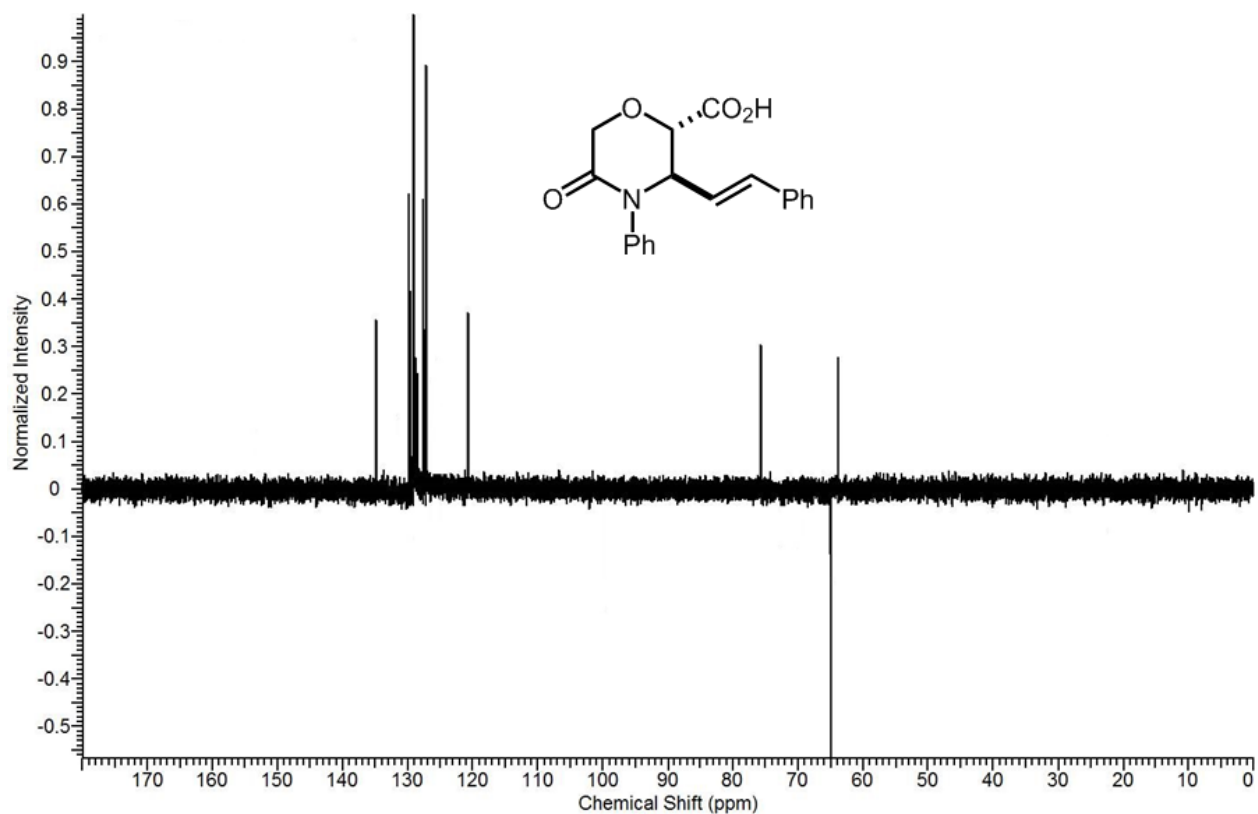

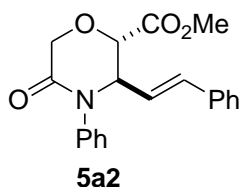

Prepared from crude **5a1** using General Procedure C. Purification: Flash chromatography on silica eluting with hexane/EtOAc (50:50 to 0:100) then 100% MeOH. Yield = 280 mg, 83% over 2 steps, >99:1 dr.  $^1\text{H}$  NMR (400 MHz,  $\text{CDCl}_3$ )  $\delta$  7.48 to 7.19 (10H, m), 6.48 (1H, d), 6.35 (1H, dd), 4.85 (1H, d), 4.75 (1H, dd), 4.53 (1H, d), 4.27 (1H, d), 3.77 (3H, s).  $^{13}\text{C}$  NMR (101 MHz,  $\text{CDCl}_3$ )  $\delta$  169.66, 165.73, 139.87, 135.55, 134.57, 129.49, 129.45, 129.26, 129.08, 128.78, 128.56, 128.35, 127.83, 127.01, 126.78, 124.74, 119.84, 75.79, 65.51, 63.26, 52.07. **HRMS- $\text{EI}^+$**  ( $m/z$ ): calc'd for  $\text{C}_{20}\text{H}_{19}\text{NO}_4$  337.1314; found 337.1317.

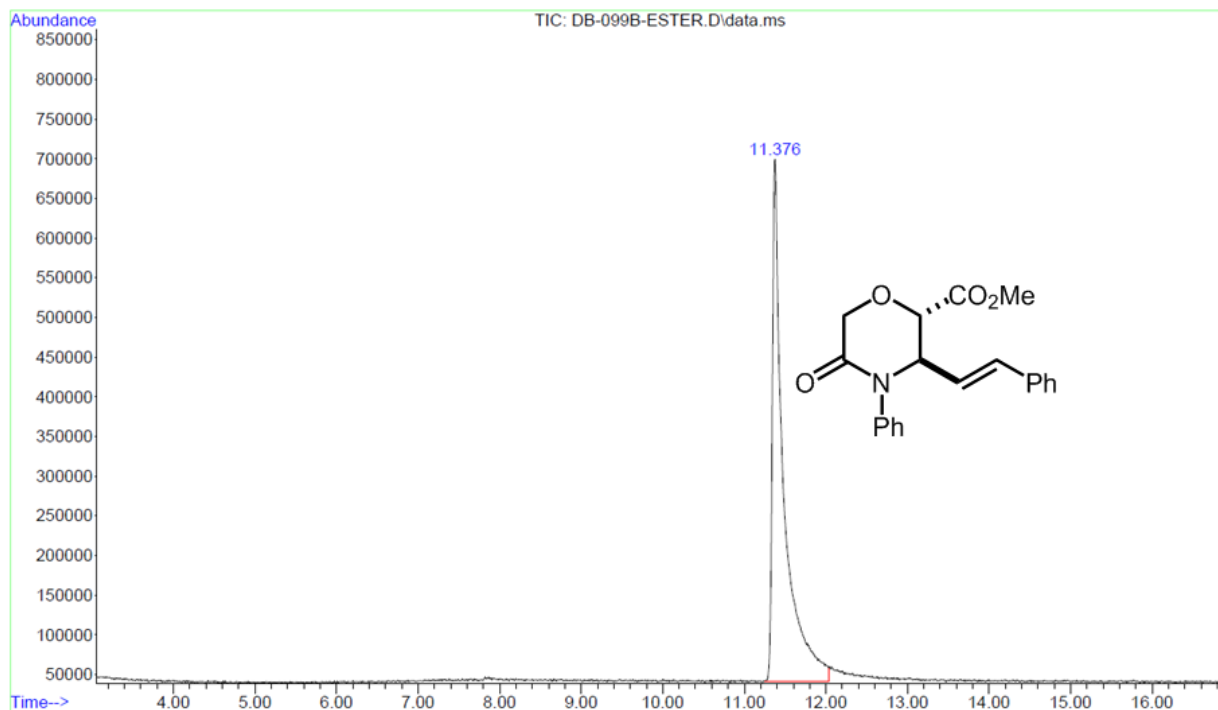

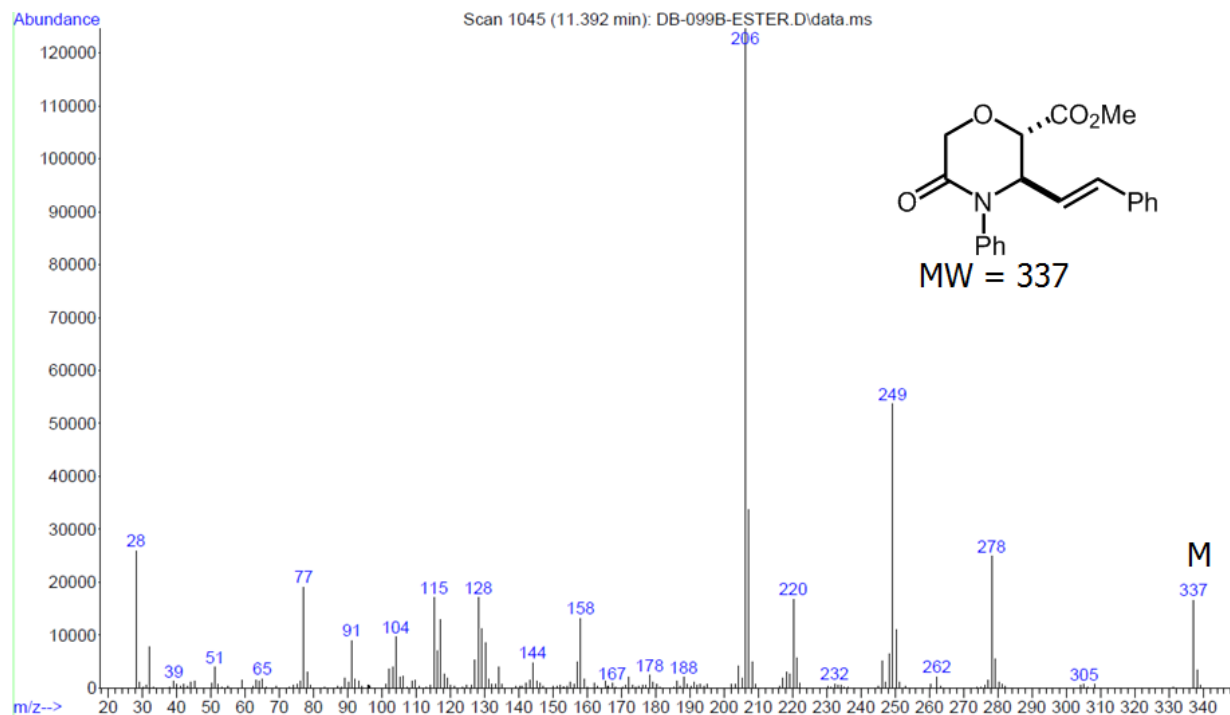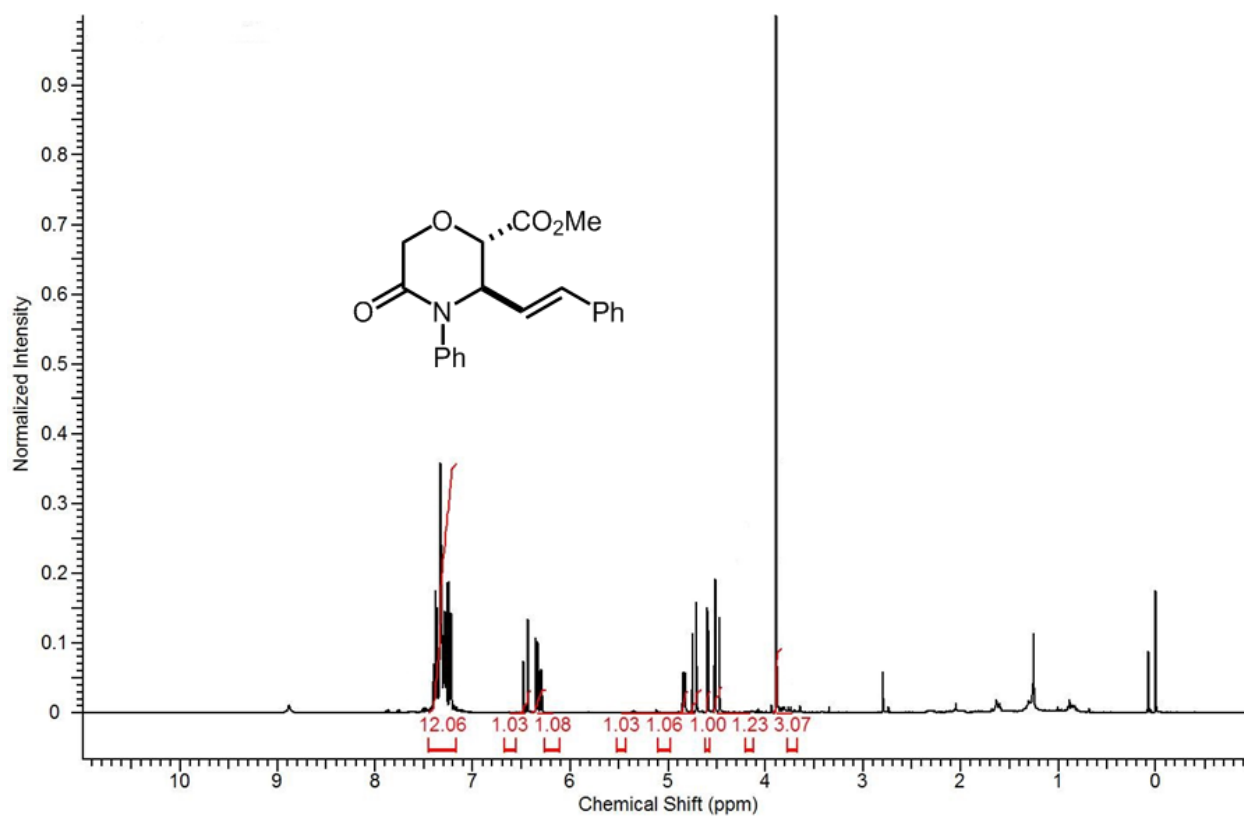

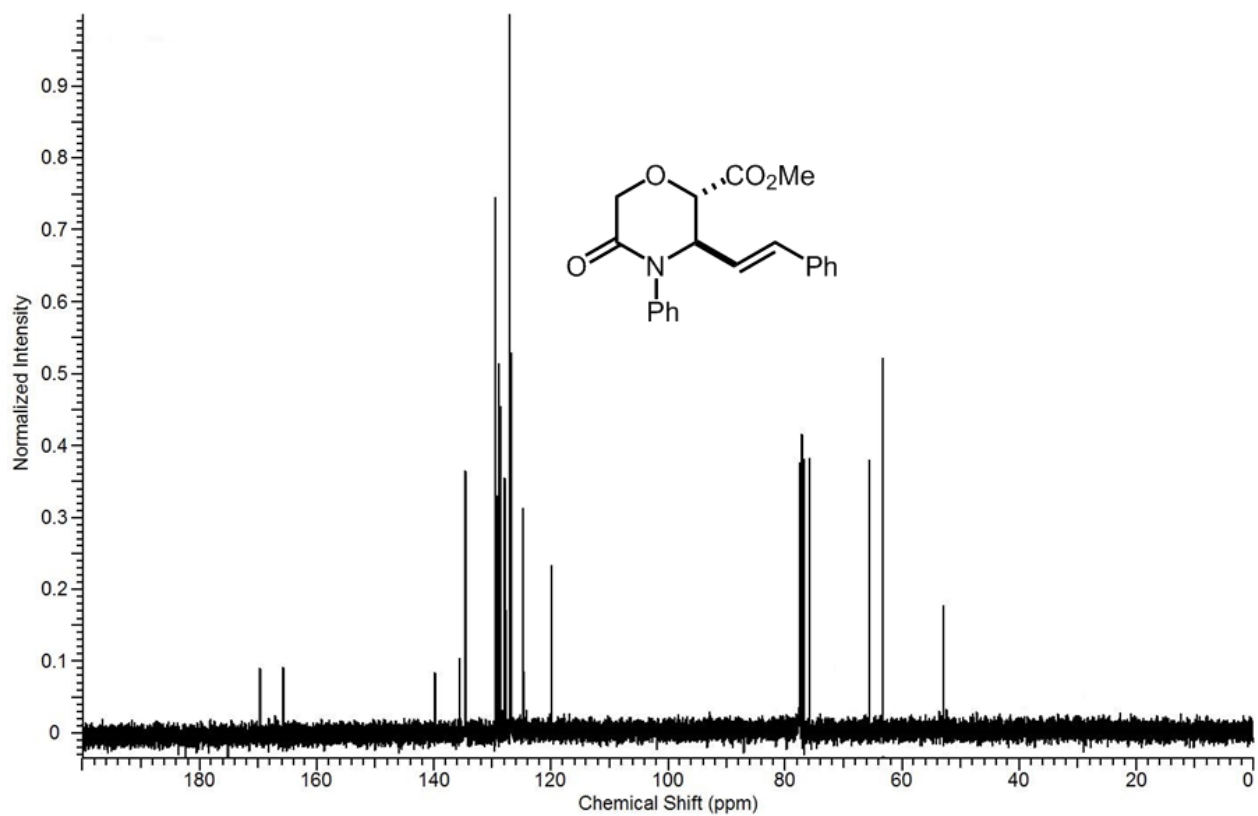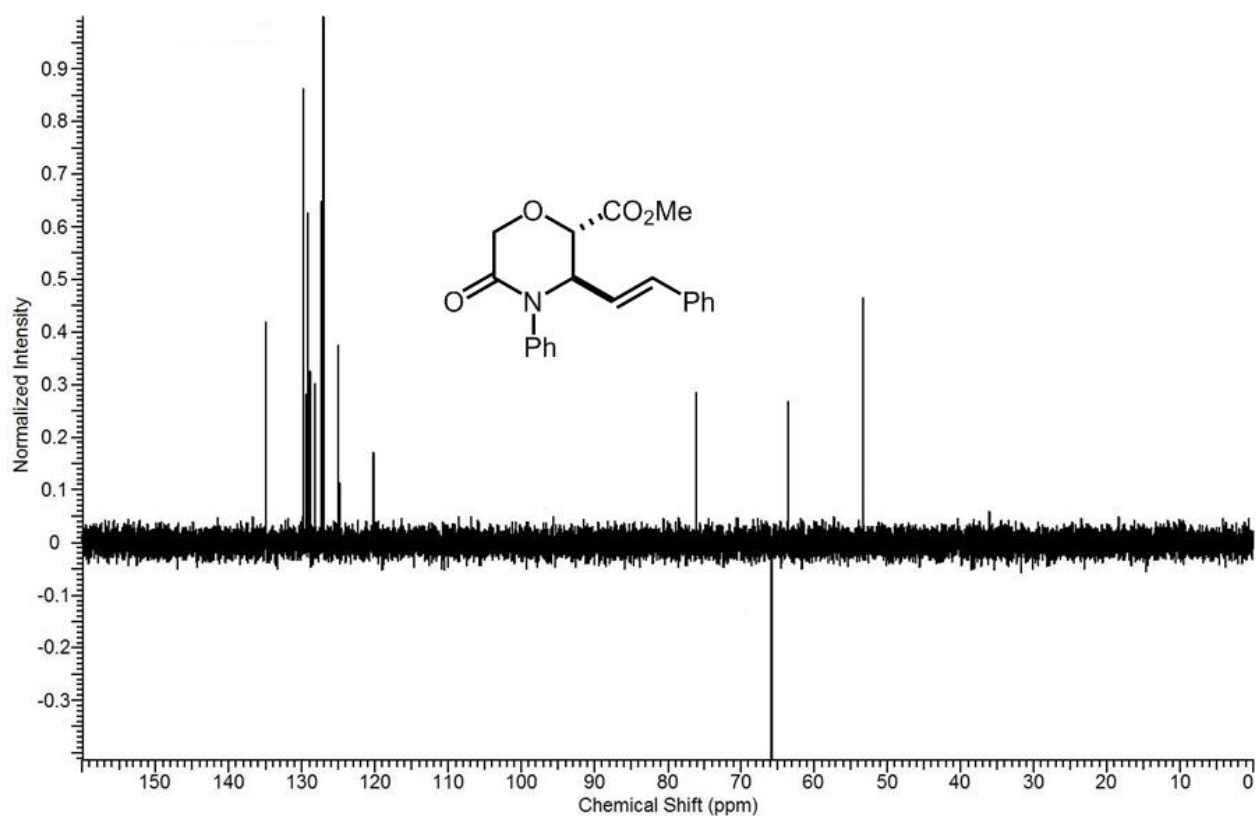

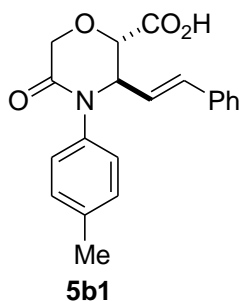

Prepared from imine **4c** (221 mg, 1.0 mmol) and diglycolic anhydride (128 mg, 1.1 equiv), using General Procedure B. T = 90 °C, time = 18 h. An analytical sample was obtained after a series of washes with cold petroleum ether.  $^1\text{H}$  NMR (400 MHz,  $\text{CDCl}_3$ )  $\delta$  10.30 (1H, s, broad), 7.40 to 7.11 (9H, m), 6.47 to 6.32 (2H, m), 4.85 (2H, m), 4.57 (2H, m), 2.30 (3H, s).  $^{13}\text{C}$  NMR (101 MHz,  $\text{CDCl}_3$ )  $\delta$  171.2, 167.7, 137.7, 137.3, 135.6, 134.5, 130.5, 129.1, 128.9, 127.2, 127.2, 124.8, 75.5, 65.4, 63.8, 21.5. **HRMS- $\text{EI}^+$**  ( $m/z$ ): calc'd for  $\text{C}_{20}\text{H}_{19}\text{NO}_4$  337.1314; found 337.1318.

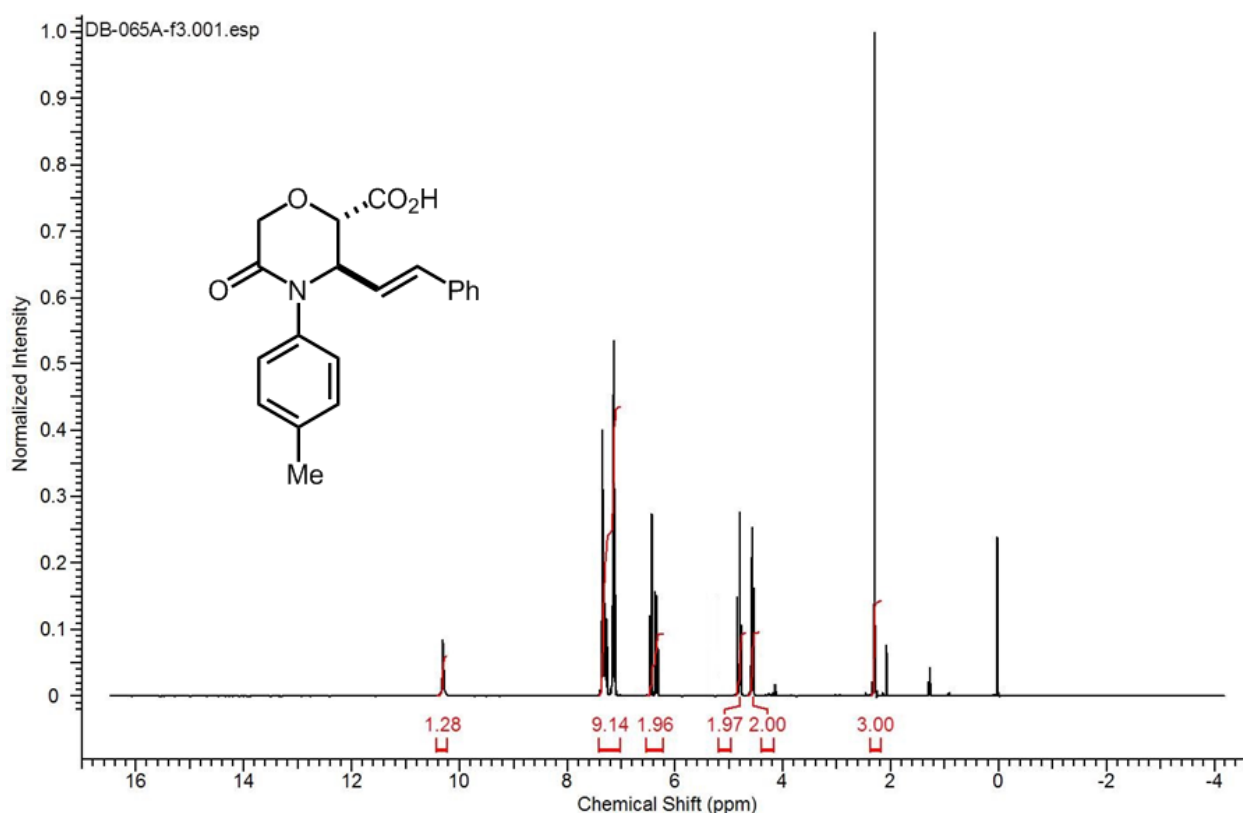

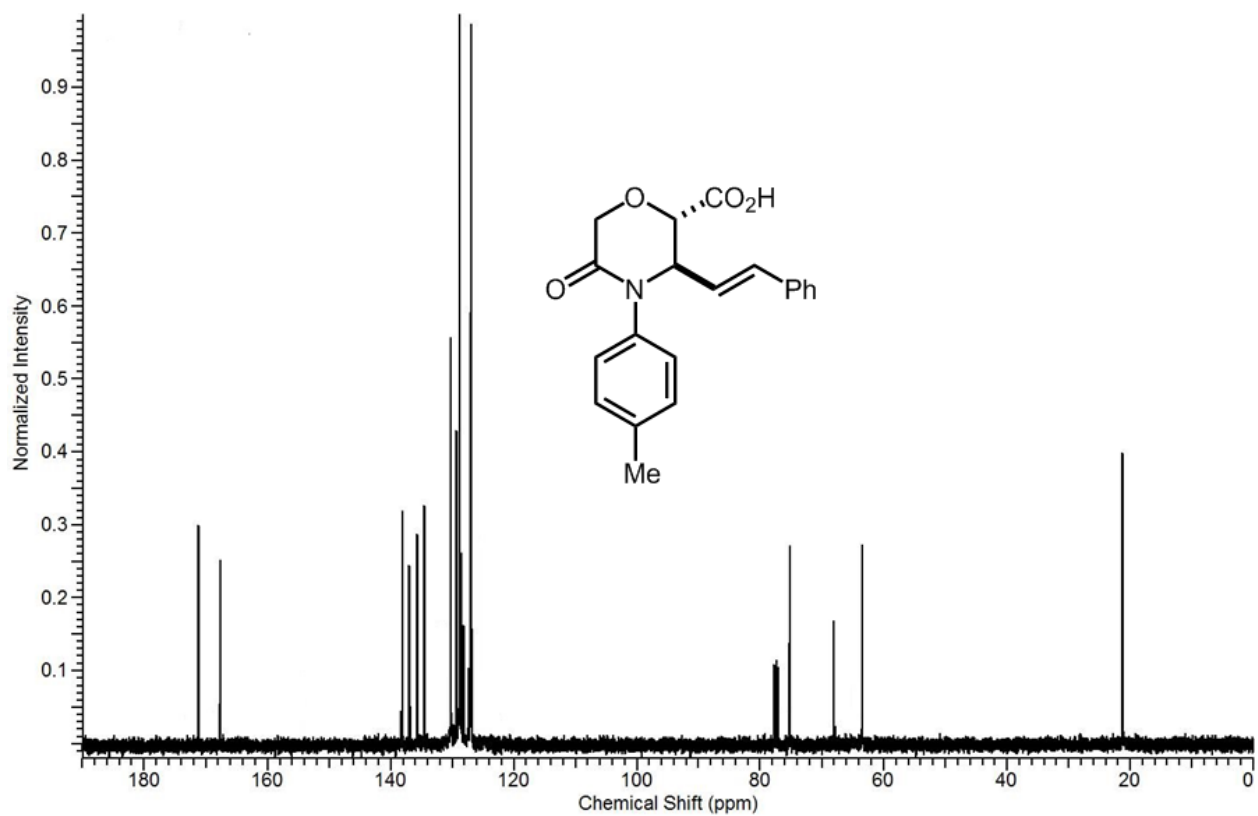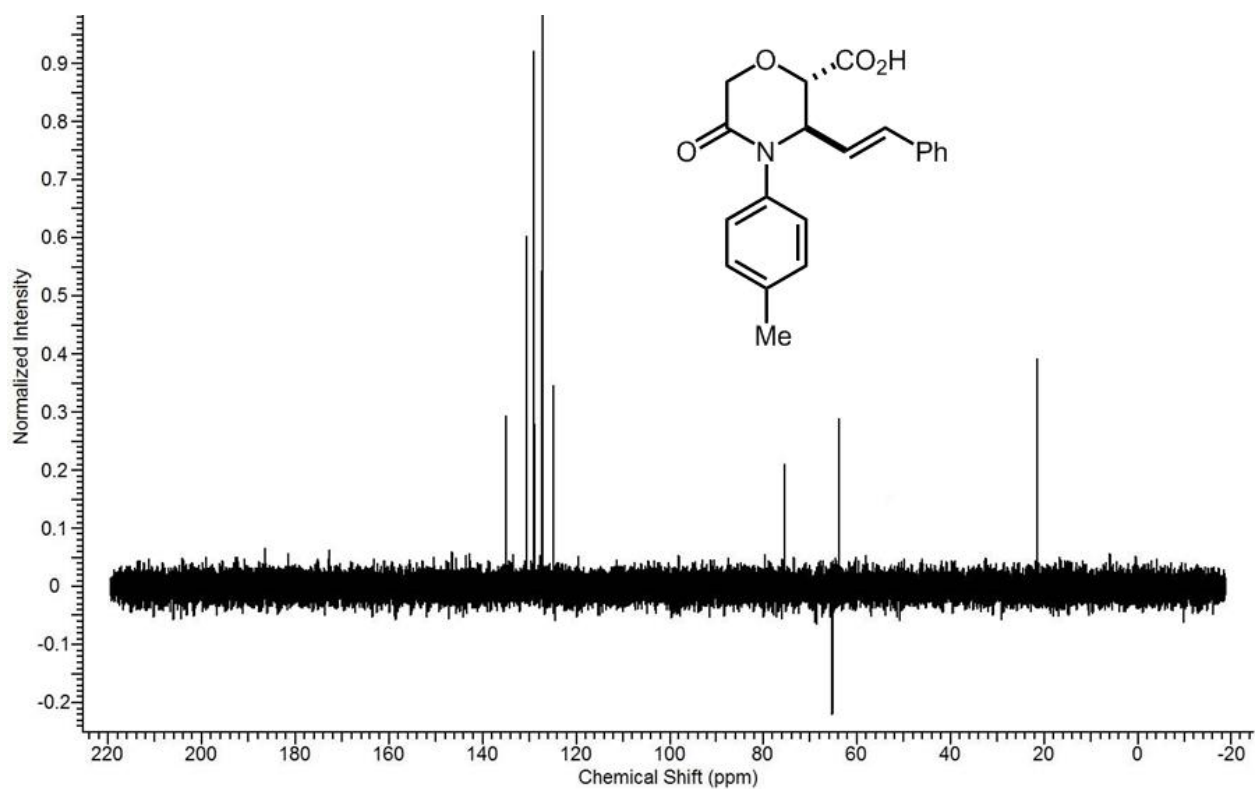

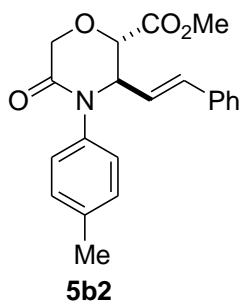

Prepared from crude **5b1** using General Procedure C. Purification: Flash chromatography on silica eluting with hexane/EtOAc (50:50 to 0:100) then 100% MeOH. Yield = 313 mg, 89% over 2 steps, >99:1 dr.  $^1\text{H}$  NMR (400 MHz,  $\text{CDCl}_3$ )  $\delta$  7.39 to 7.11 (9H, m), 6.45 (1H, d), 6.32 (1H, dd), 4.82 to 4.47 (4H, dd), 3.88 (3H, s), 2.38 (3H, s).  $^{13}\text{C}$  NMR (101 MHz,  $\text{CDCl}_3$ )  $\delta$  169.7, 165.8, 137.7, 137.2, 135.6, 134.4, 130.1, 128.8, 128.5, 126.8, 126.8, 124.8, 75.8, 65.5, 63.3, 53.0, 21.2. **HRMS- $\text{EI}^+$**  ( $m/z$ ): calc'd for  $\text{C}_{21}\text{H}_{21}\text{NO}_4$  351.1417; found 351.1421.

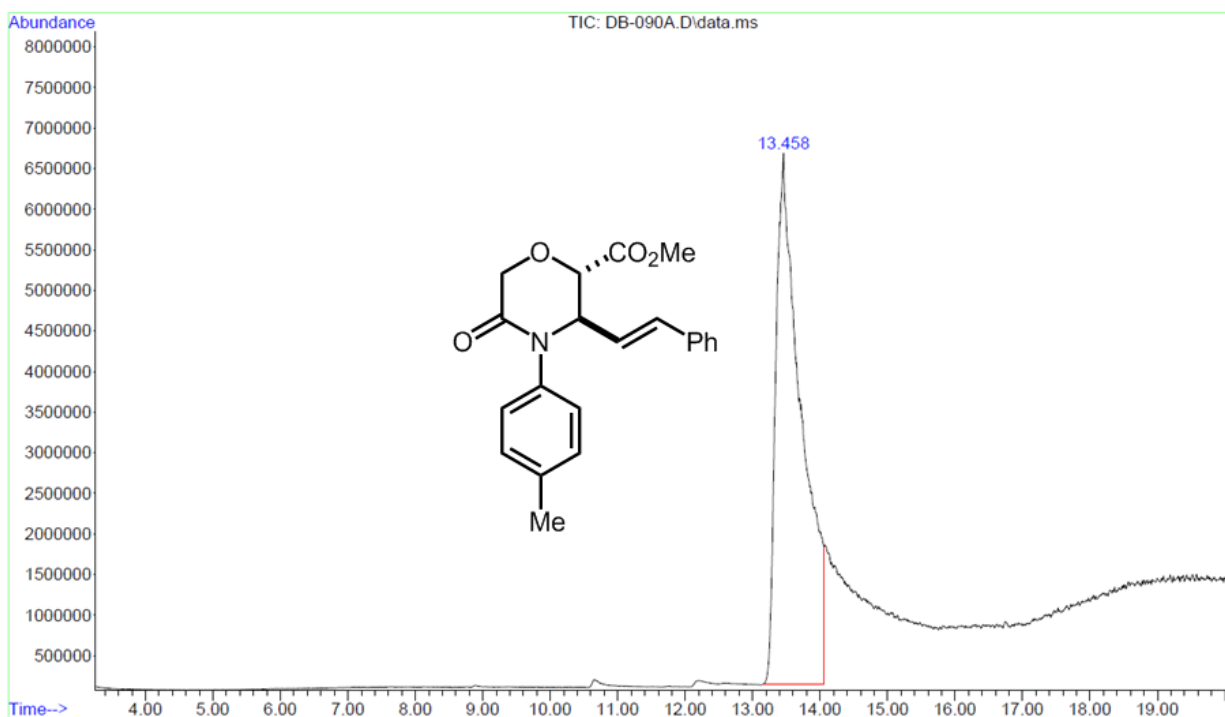



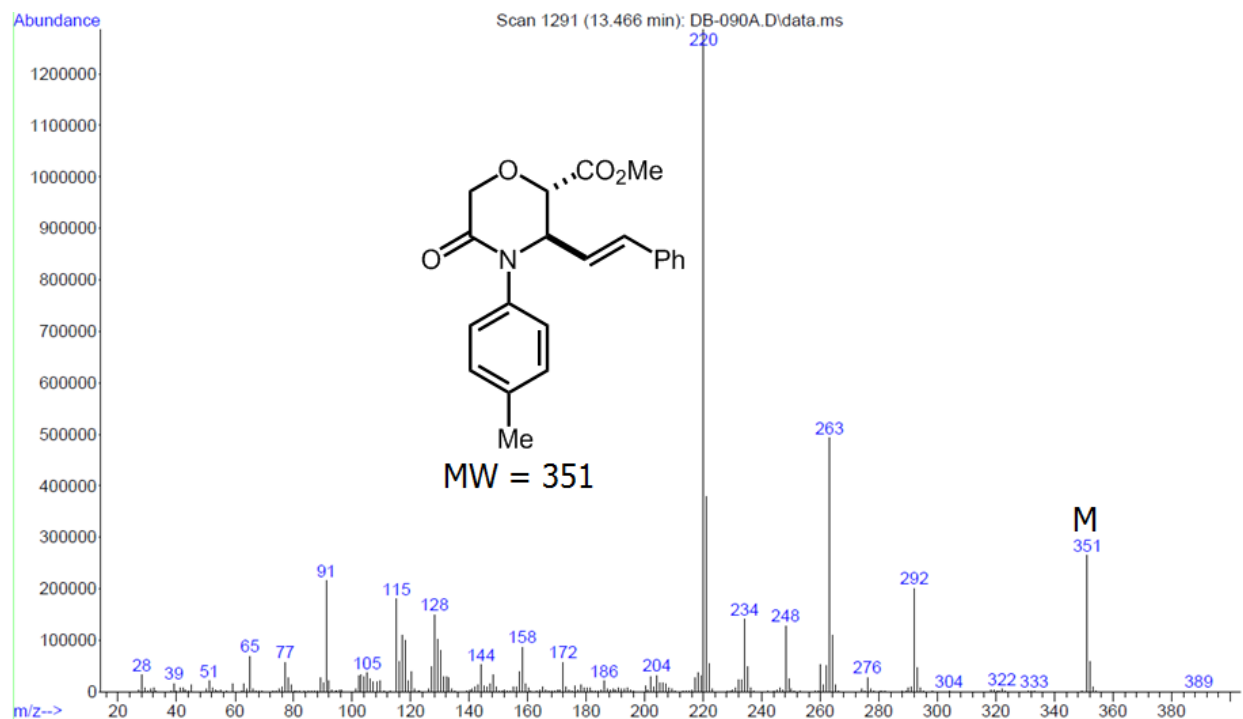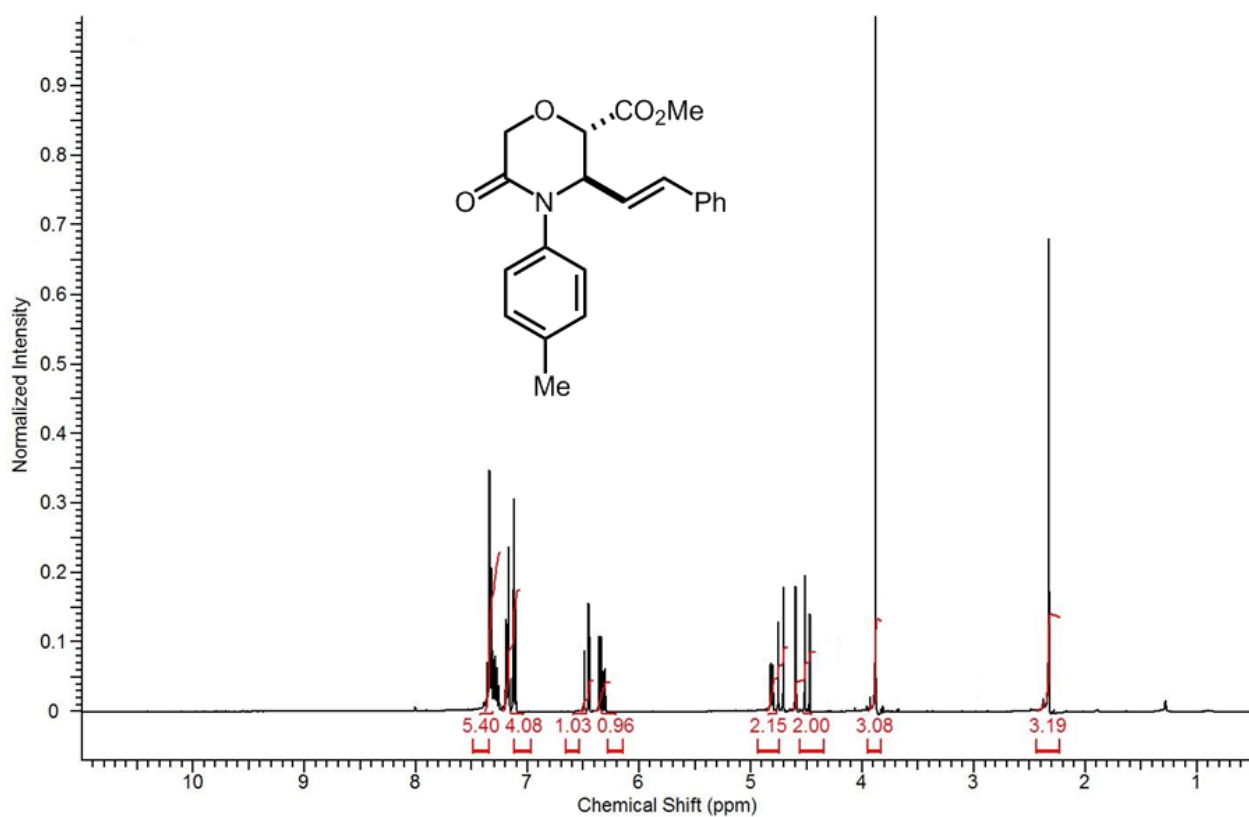

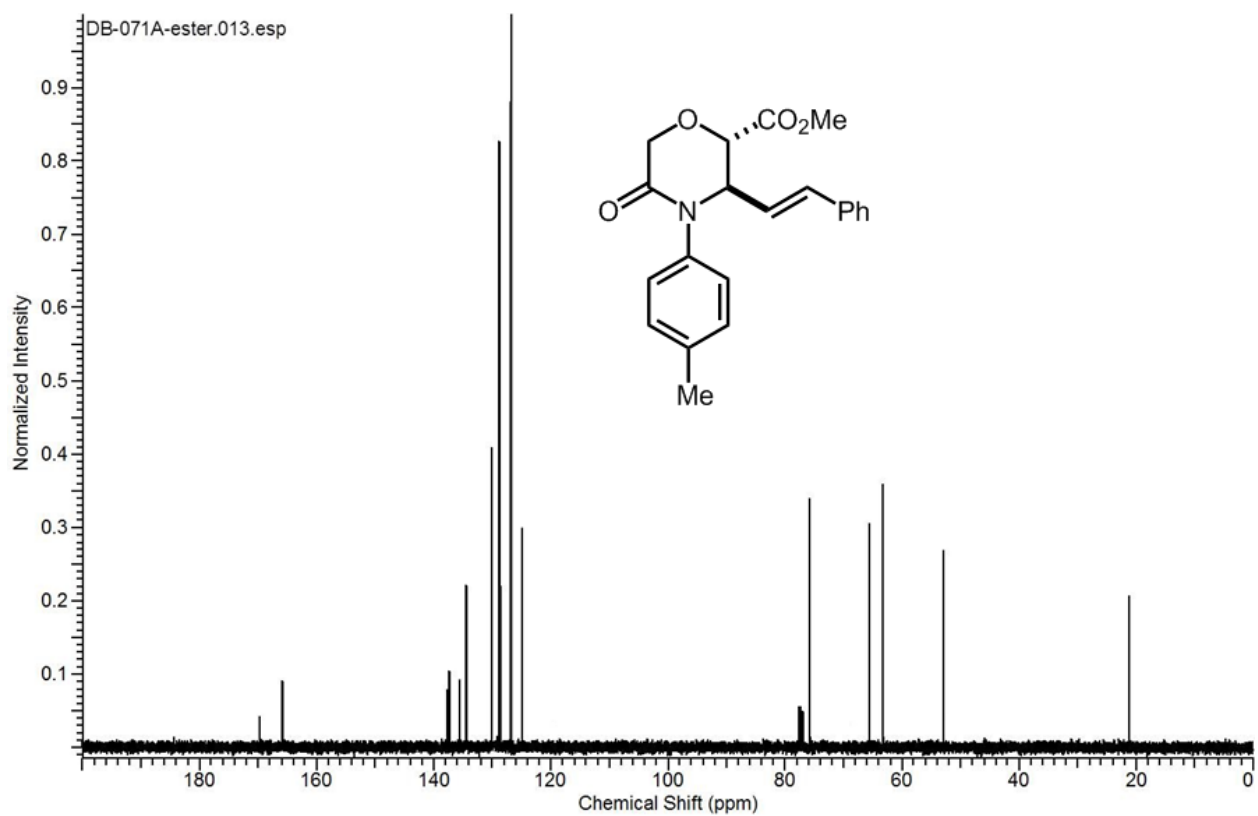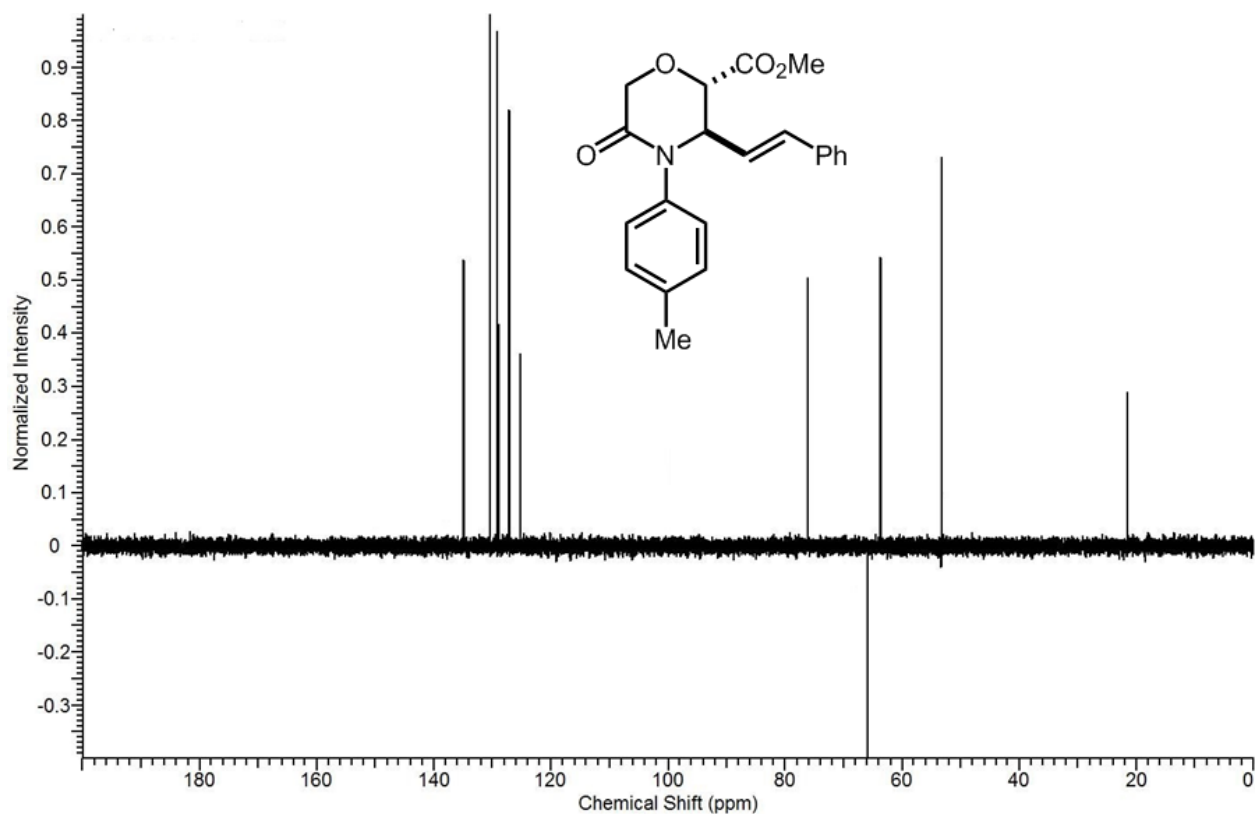

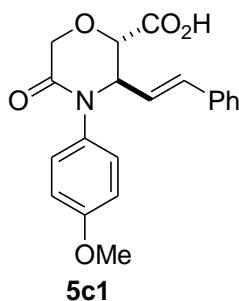

Prepared from imine **4b** (237 mg, 1.0 mmol) and diglycolic anhydride (128 mg, 1.1 equiv), using General Procedure B. T = 90 °C, time = 18 h. An analytical sample was obtained after a series of washes with cold petroleum ether. Yield = 300 mg, 84%.  $^1\text{H}$  NMR (400 MHz, MeOH)  $\delta$  7.39 to 7.12 (5H, m), 6.92 (2H, d), 6.48 (2H, d), 4.79 (1H, d), 4.65 to 4.61 (2H, dd), 4.44 (1H, d), 3.77 (3H, s).  $^{13}\text{C}$  NMR (101 MHz, MeOH)  $\delta$  170.9, 167.4, 159.1, 135.9, 134.4, 134.1, 132.5, 128.3, 128.1, 128.1, 127.9, 127.9, 126.4, 124.8, 114.1, 75.4, 64.6, 63.8, 54.5. **HRMS-ESI<sup>+</sup>** ( $m/z$ ): calc'd for  $\text{C}_{20}\text{H}_{19}\text{NO}_5$  353.1263; found 353.1267.

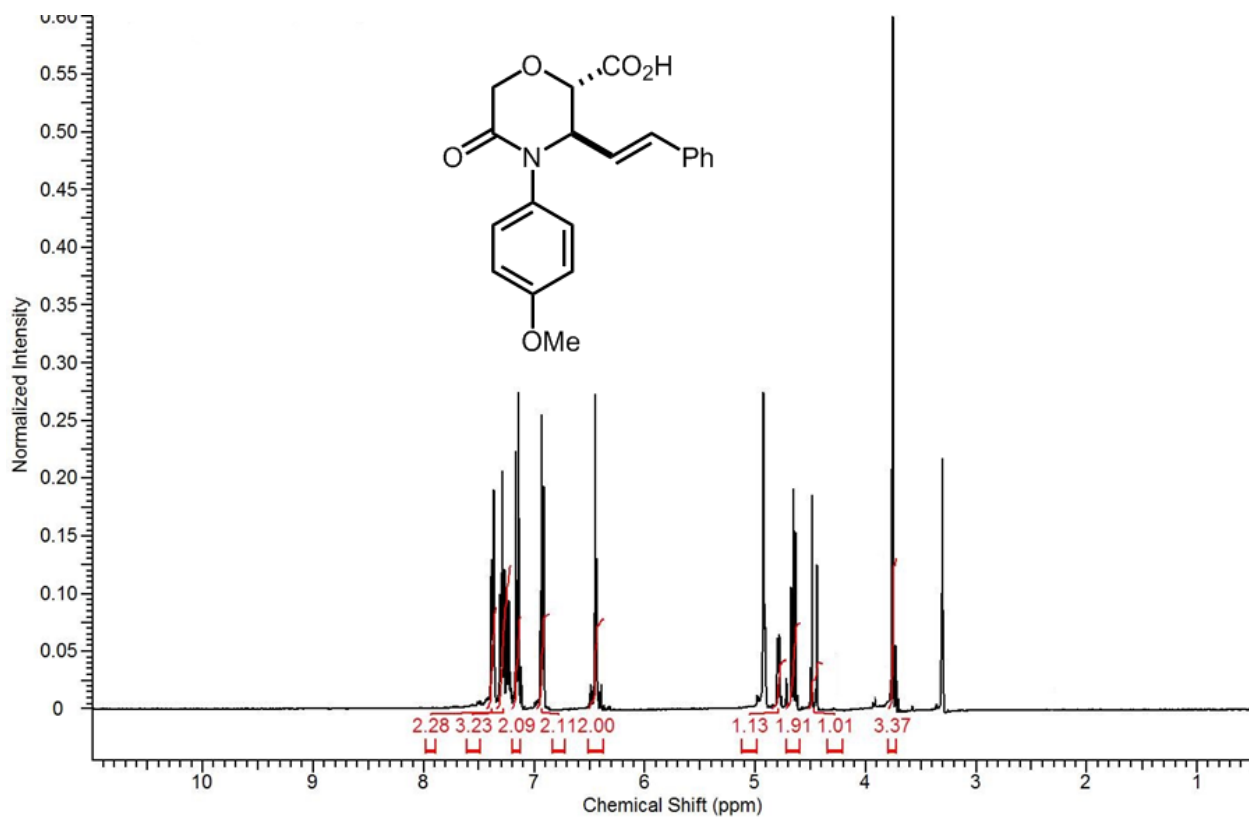

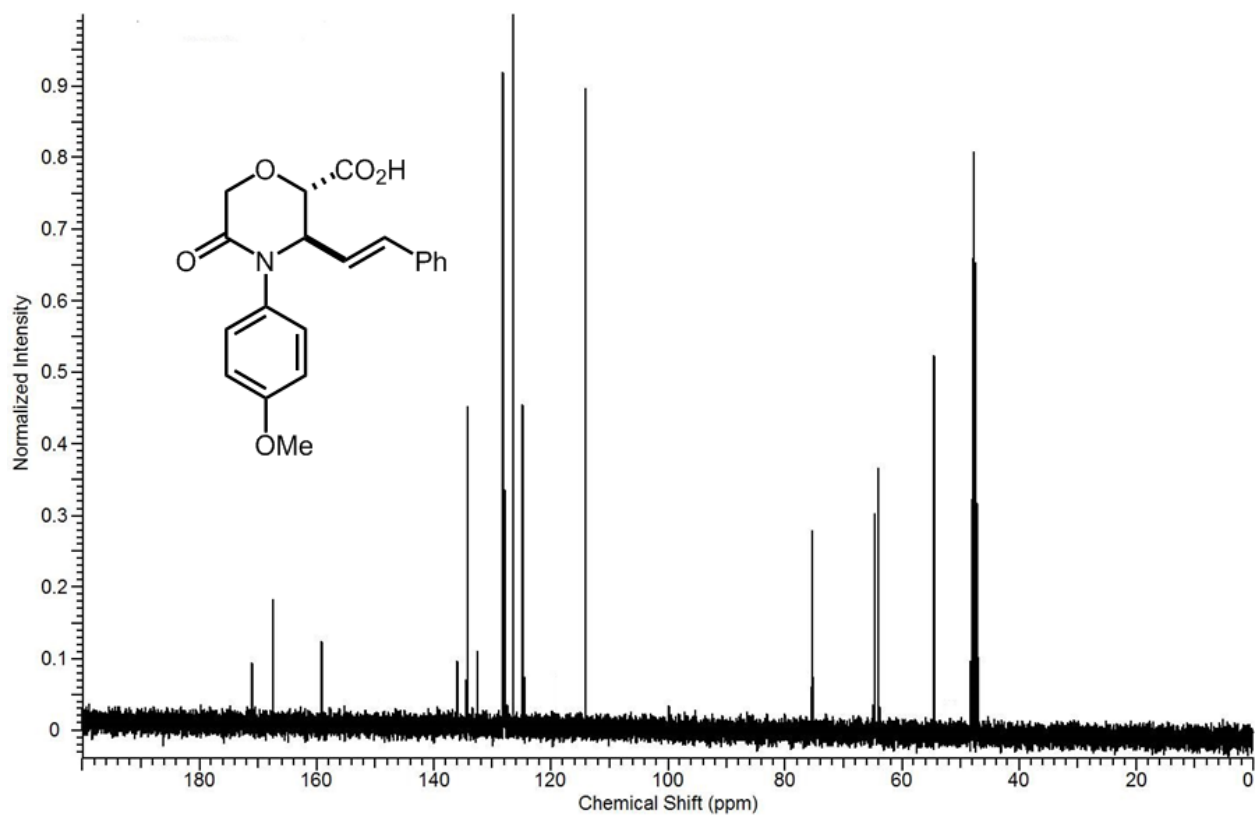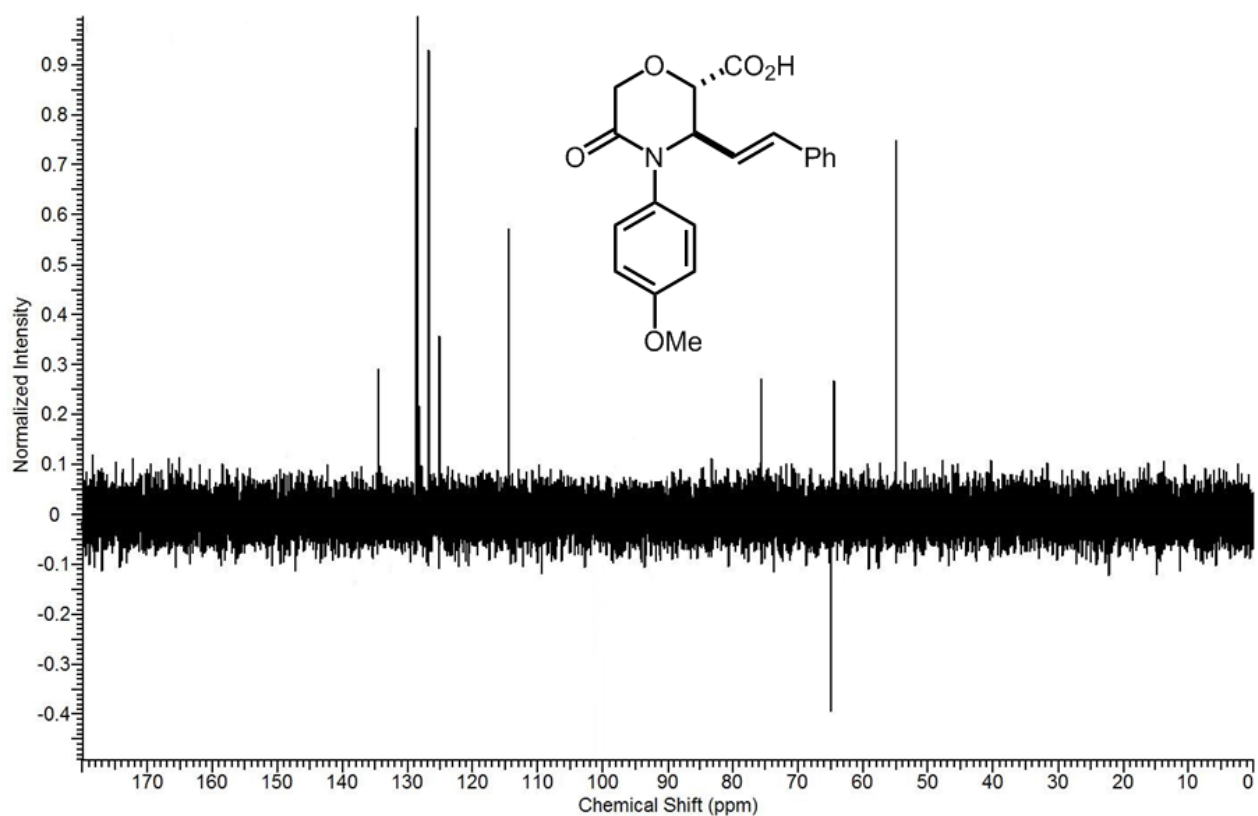

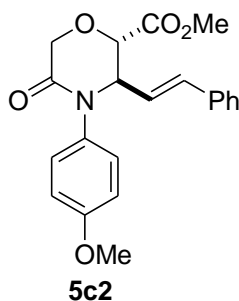

Prepared from crude **5c1** using General Procedure C. Purification: Flash chromatography on silica eluting with hexane/EtOAc (50:50 to 0:100) then 100% MeOH. Yield = 338 mg, 92% over 2 steps, >99:1 dr.  $^1\text{H}$  NMR (400 MHz,  $\text{CDCl}_3$ )  $\delta$  7.38 to 7.25 (5H, m), 7.13 (2H, d), 6.88 (2H, d), 6.42 to 6.28 (2H, m), 4.77 to 4.44 (3H, m), 3.87 to 3.75 (7H, m).  $^{13}\text{C}$  NMR (101 MHz,  $\text{CDCl}_3$ )  $\delta$  169.6, 165.9, 158.8, 136.3, 135.5, 134.6, 132.5, 129.3, 128.8, 128.7, 128.7, 128.5, 128.3, 126.8, 126.7, 124.7, 114.1, 75.7, 65.5, 63.5, 55.5, 52.7. **HRMS- $\text{EI}^+$**  ( $m/z$ ): calc'd for  $\text{C}_{21}\text{H}_{21}\text{NO}_5$  367.1420; found 367.1416.

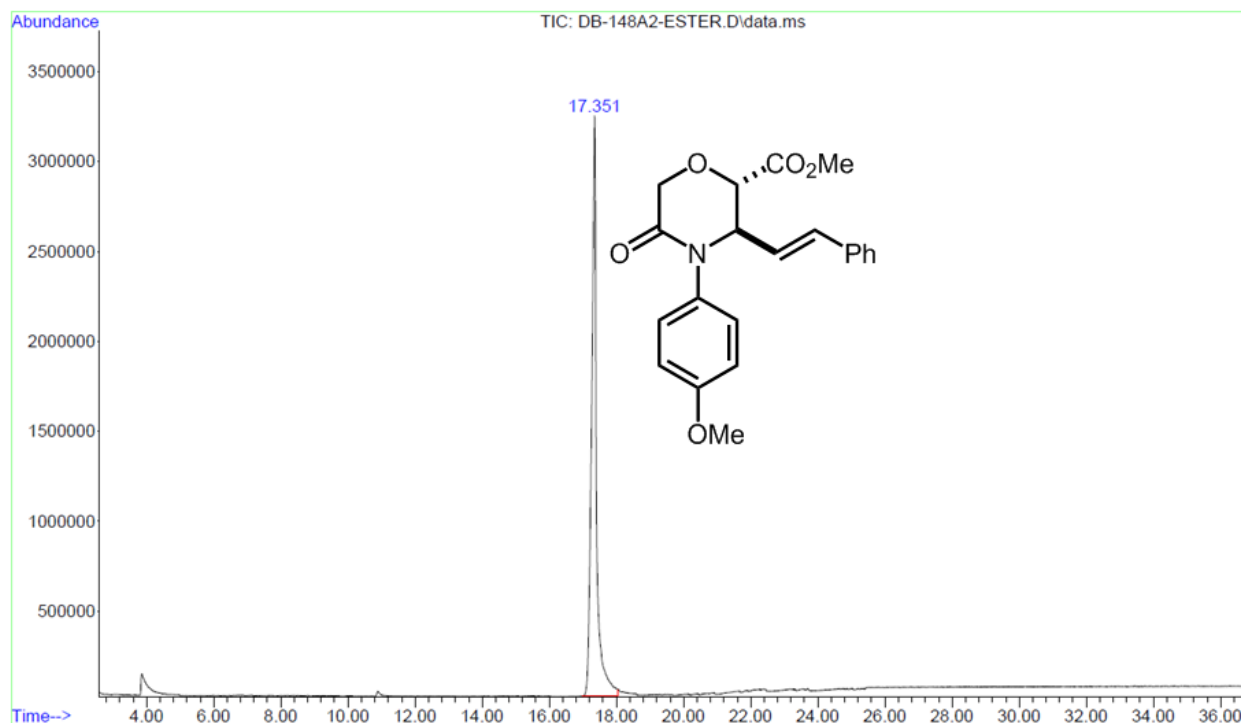

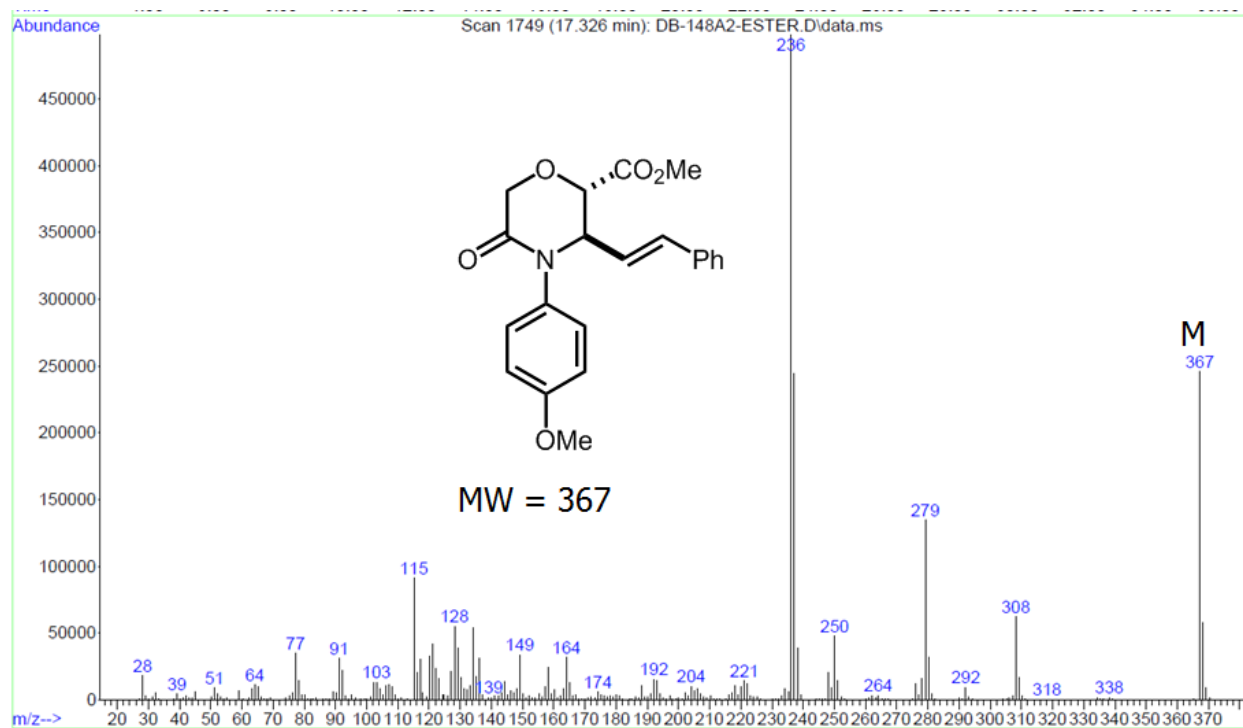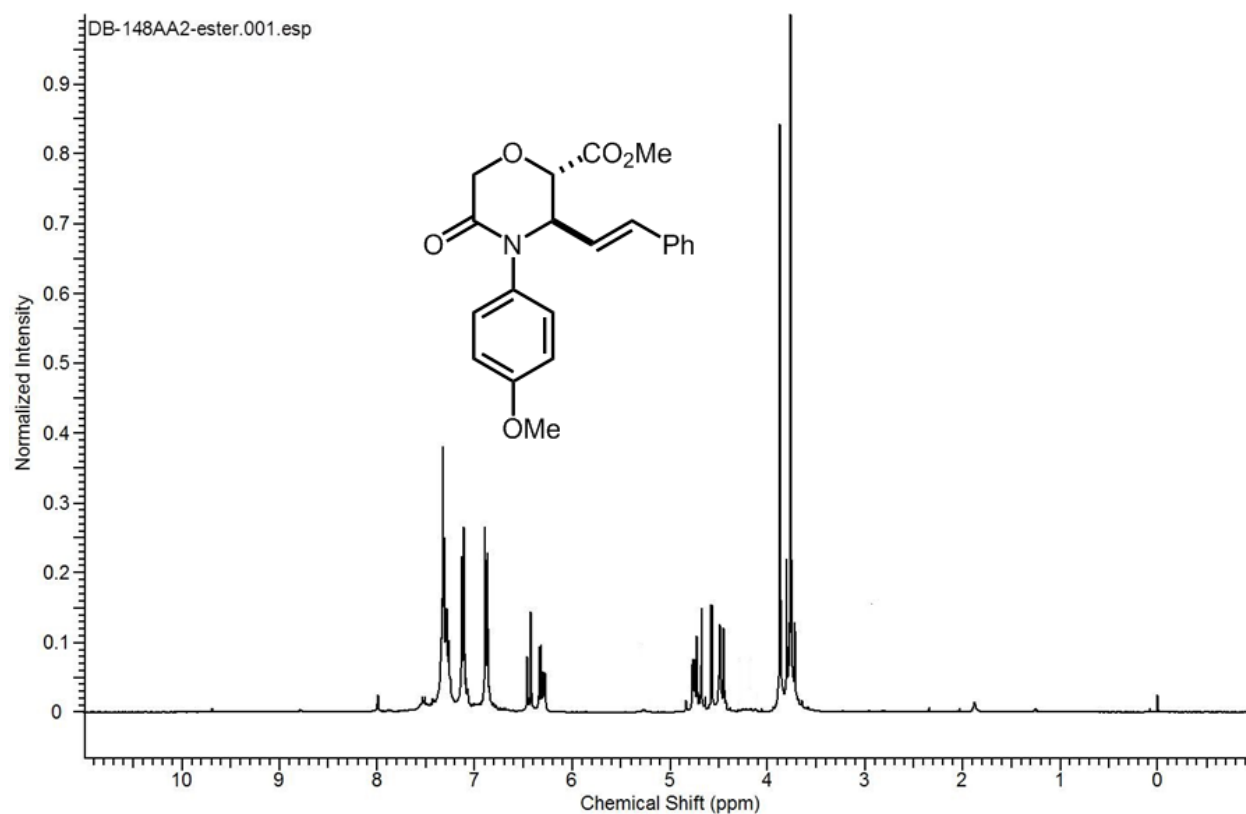

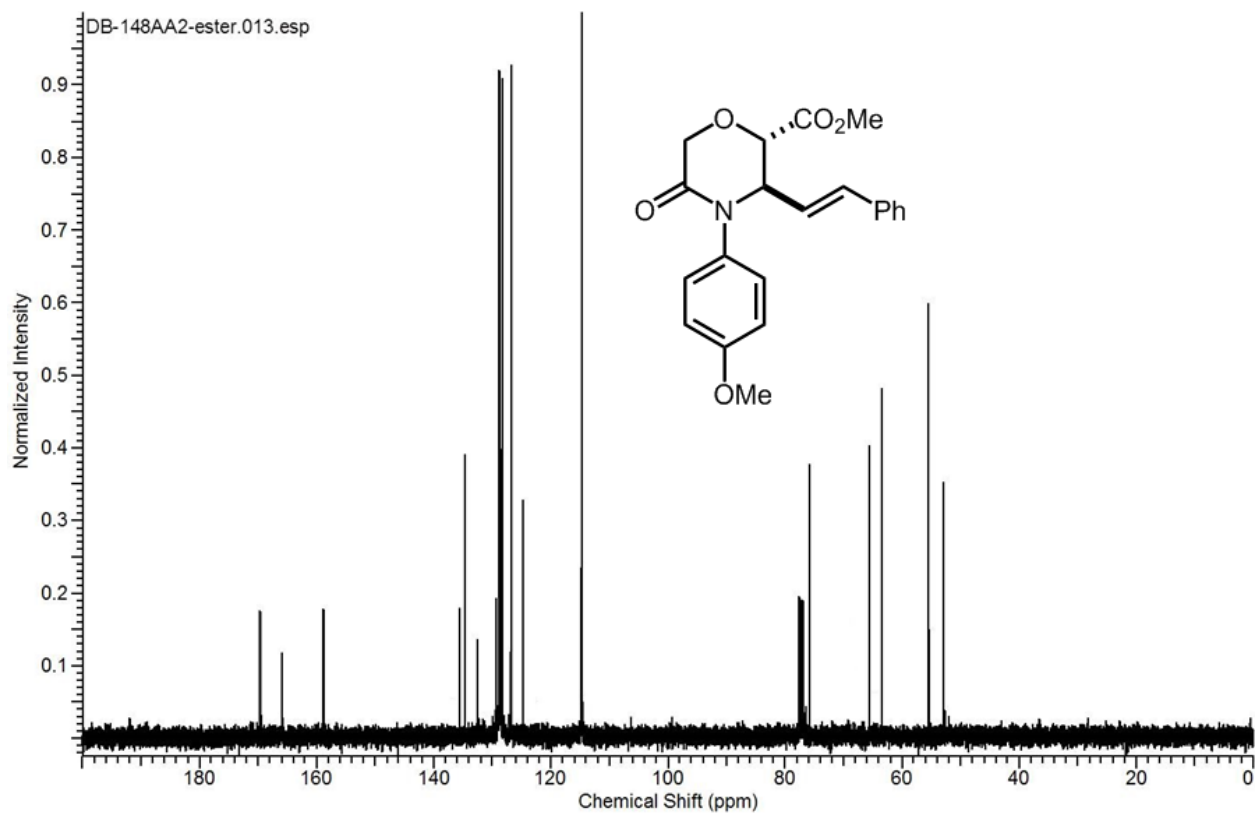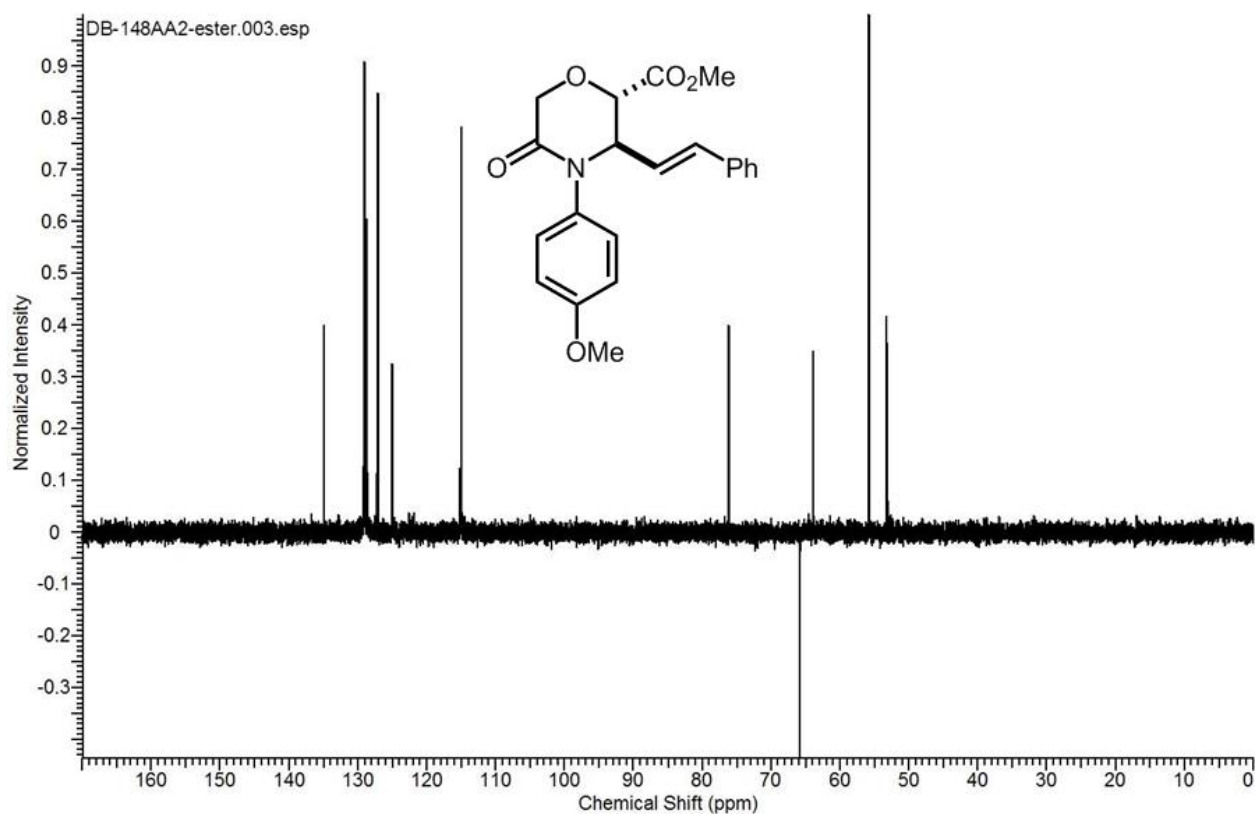

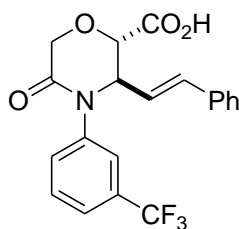**5d1**

Prepared from imine **4e** (275 mg, 1.0 mmol) and diglycolic anhydride (128 mg, 1.1 equiv), using General Procedure B. T = 100 °C, time = 18 h. An analytical sample was obtained after a series of washes with cold petroleum ether.  $^1\text{H}$  NMR (400 MHz,  $\text{CDCl}_3$ )  $\delta$  11.77 (1H, s), 7.69 to 7.24 (4H, m), 6.43 to 6.30 (2H, m), 4.86 to 4.74 (2H, dd), 4.60 to 4.48 (2H, dd).  $^{13}\text{C}$  NMR (101 MHz,  $\text{CDCl}_3$ )  $\delta$  173.97, 163.48, 139.95, 139.84, 137.52, 137.33, 135.28, 133.90, 132.28, 132.10, 131.95, 131.67, 131.62, 131.30, 131.11, 130.81, 130.18, 130.10, 129.69, 129.46, 129.28, 129.23, 129.13, 129.09, 128.82, 128.77, 128.56, 128.32, 128.23, 127.66, 126.94, 126.84, 126.15, 125.72, 124.97, 124.94, 124.19, 124.15, 124.11, 123.94, 123.42, 122.24, 75.73, 65.02, 63.83. **HRMS- $\text{EI}^+$**  ( $m/z$ ): calc'd for  $\text{C}_{20}\text{H}_{16}\text{F}_3\text{NO}_4$  391.1031; found 391.1022.

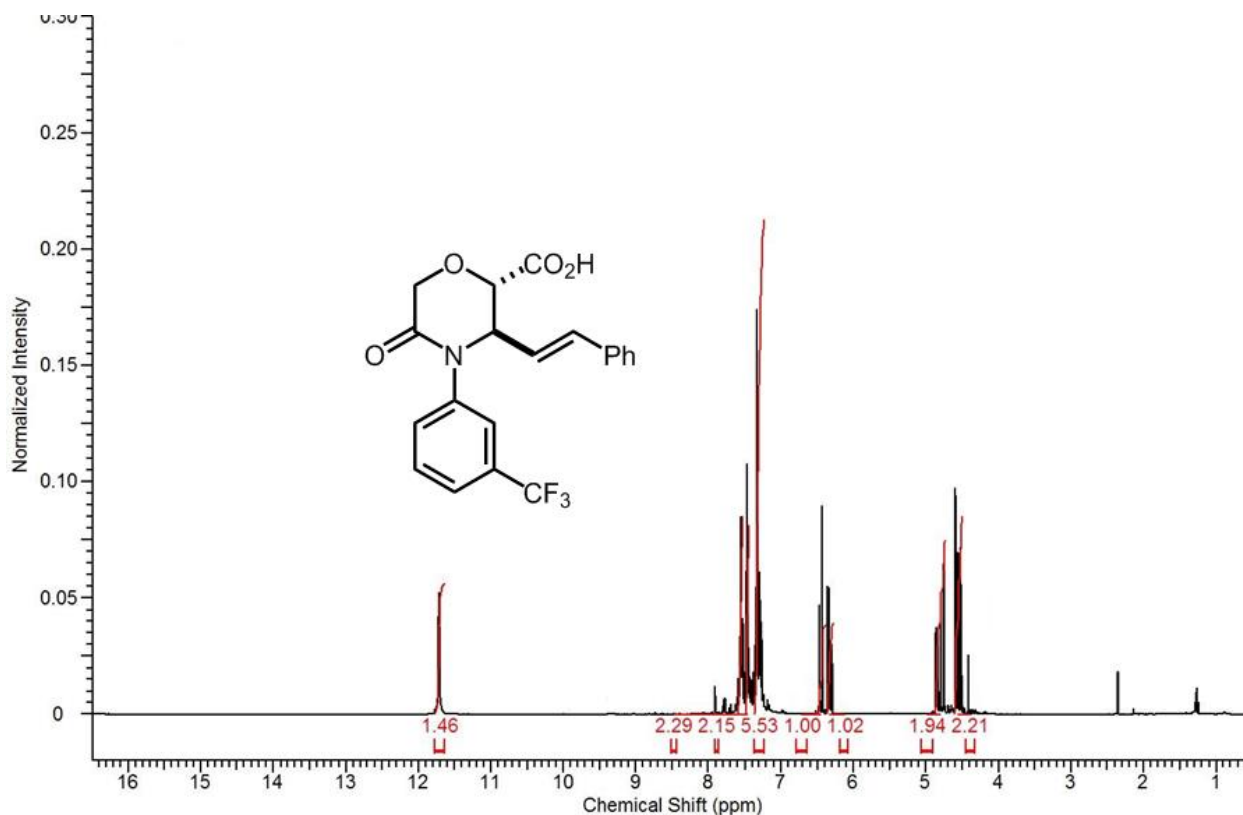



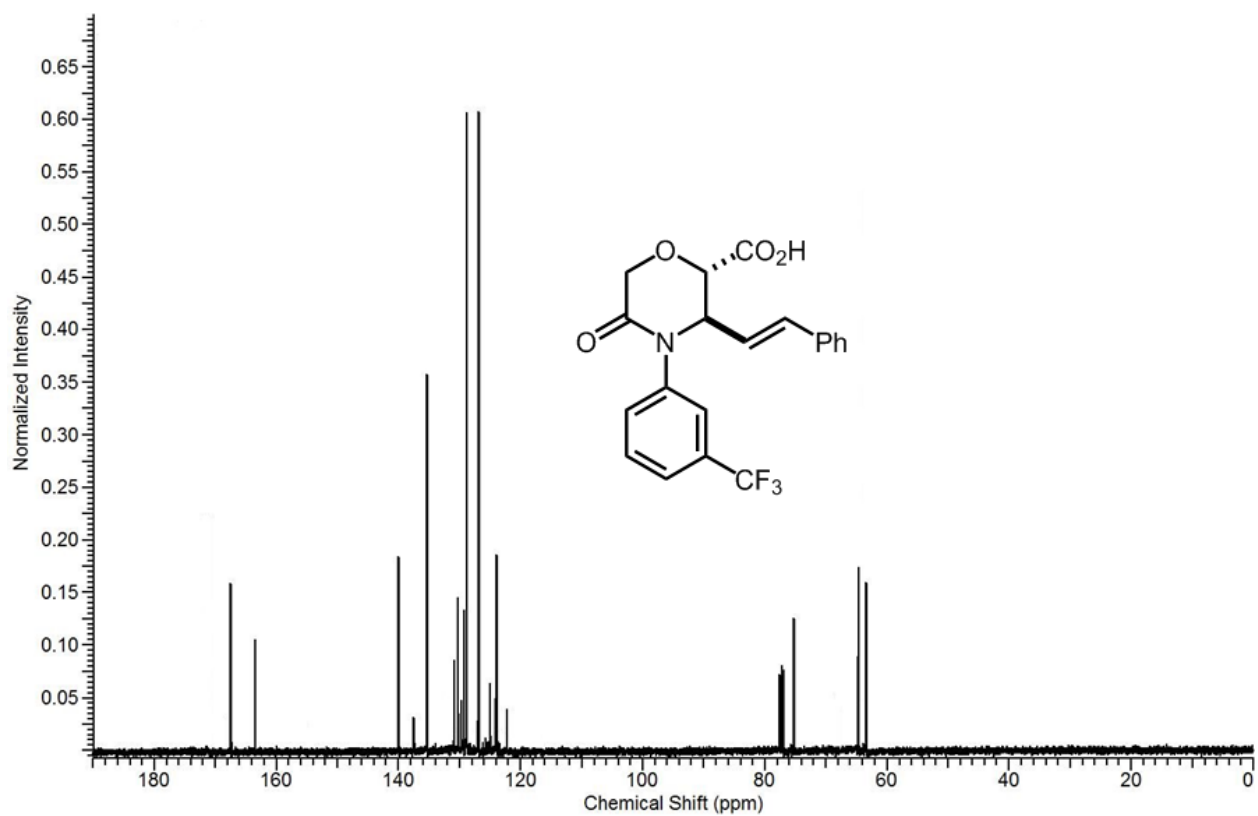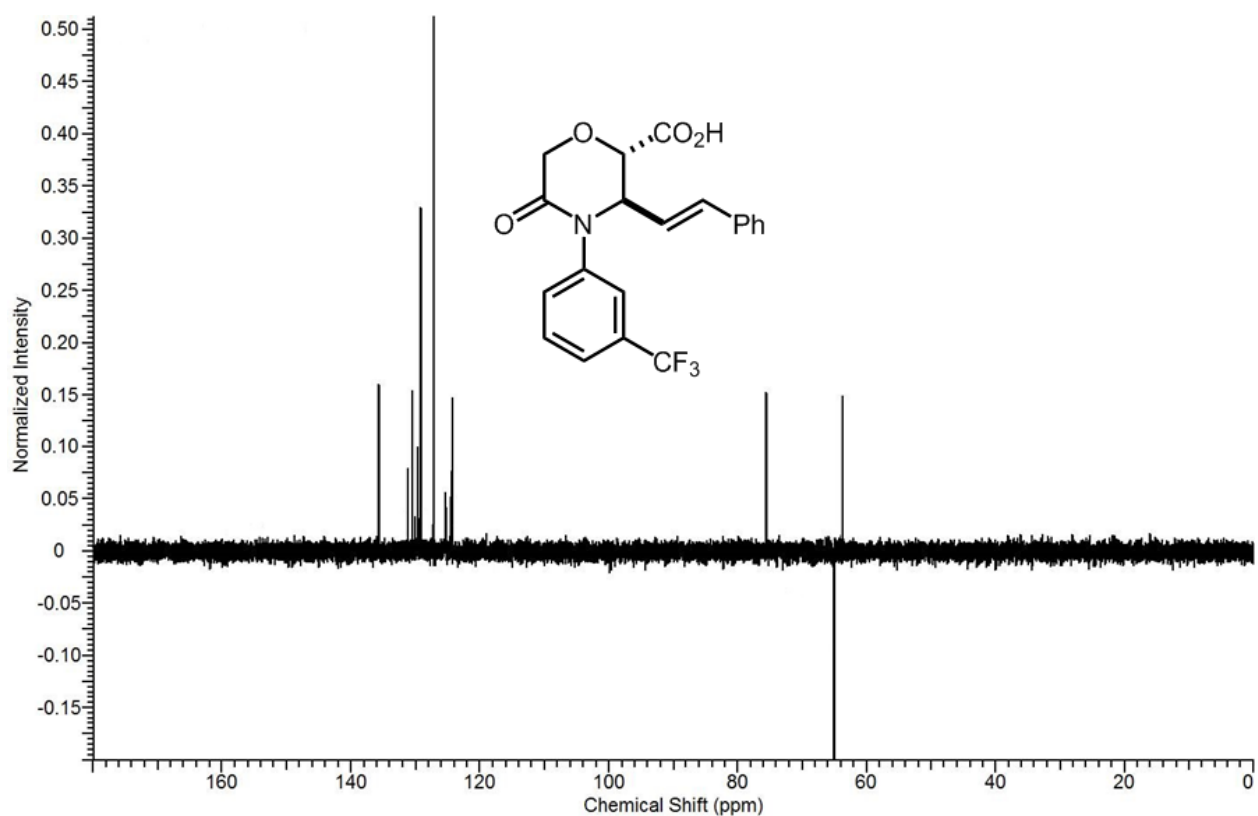

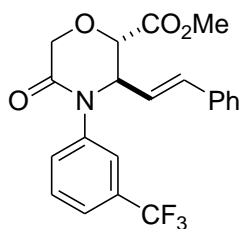**5d2**

Prepared from crude **5d1** using General Procedure C. Purification: Flash chromatography on silica eluting with hexane/EtOAc (50:50 to 0:100) then 100% MeOH. Yield = 304 mg, 75% over 2 steps, >99:1 dr.  $^1\text{H}$  NMR (400 MHz,  $\text{CDCl}_3$ )  $\delta$  7.60 to 7.25 (4H, m), 6.44 (1H, d), 6.28 (1H, dd), 4.85 (1H, d), 4.72 (1H, d), 4.56 (1H, d), 4.30 (1H, d), 3.77 (3H, s).  $^{13}\text{C}$  NMR (101 MHz,  $\text{CDCl}_3$ )  $\delta$  170.15, 165.81, 140.32, 136.82, 132.02, 131.69, 131.35, 130.64, 130.06, 129.98, 129.58, 129.35, 129.17, 128.80, 128.75, 128.72, 128.63, 128.56, 127.99, 126.83, 126.77, 124.94, 124.62, 124.59, 124.55, 124.51, 124.18, 123.91, 123.87, 123.83, 123.79, 122.85, 122.23, 75.76, 65.52, 63.93, 53.03. **HRMS- $\text{EI}^+$**  ( $m/z$ ): calc'd for  $\text{C}_{21}\text{H}_{18}\text{F}_3\text{NO}_4$  405.1188; found 405.1194.

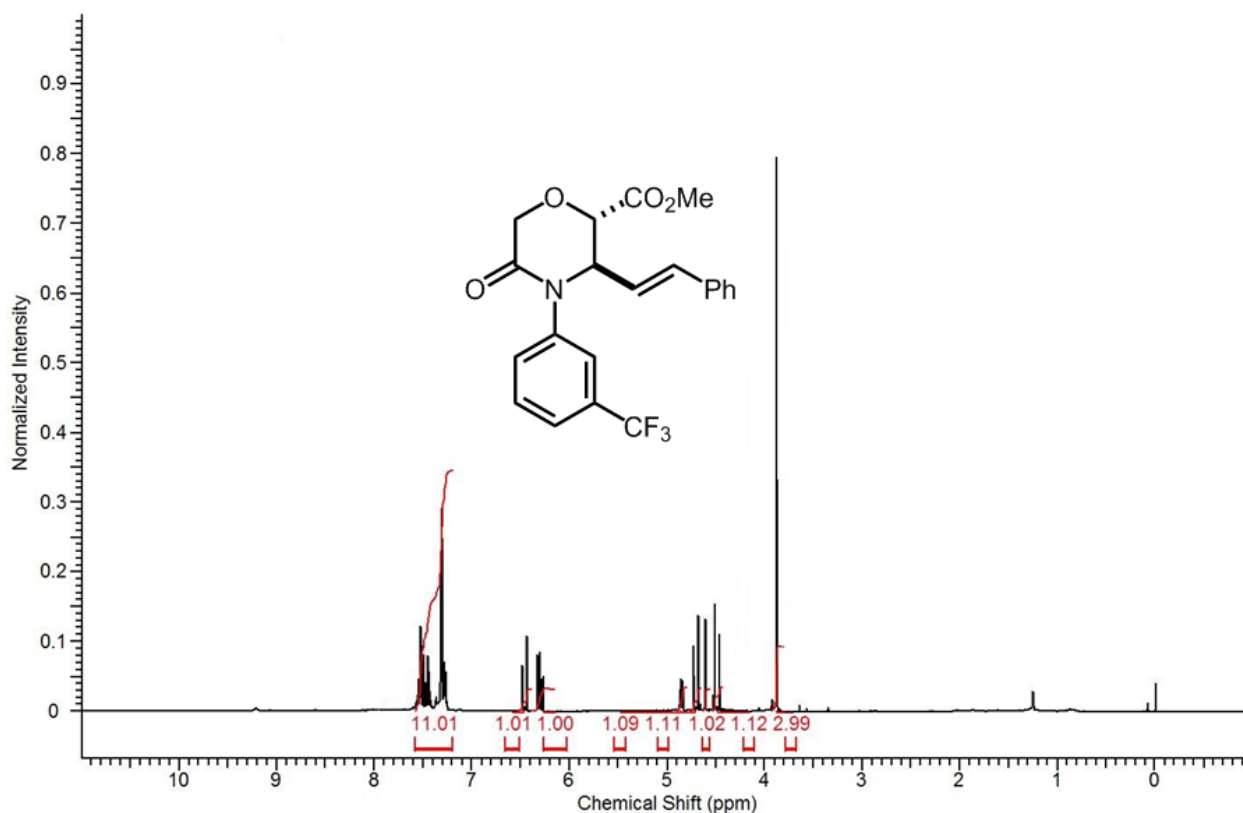

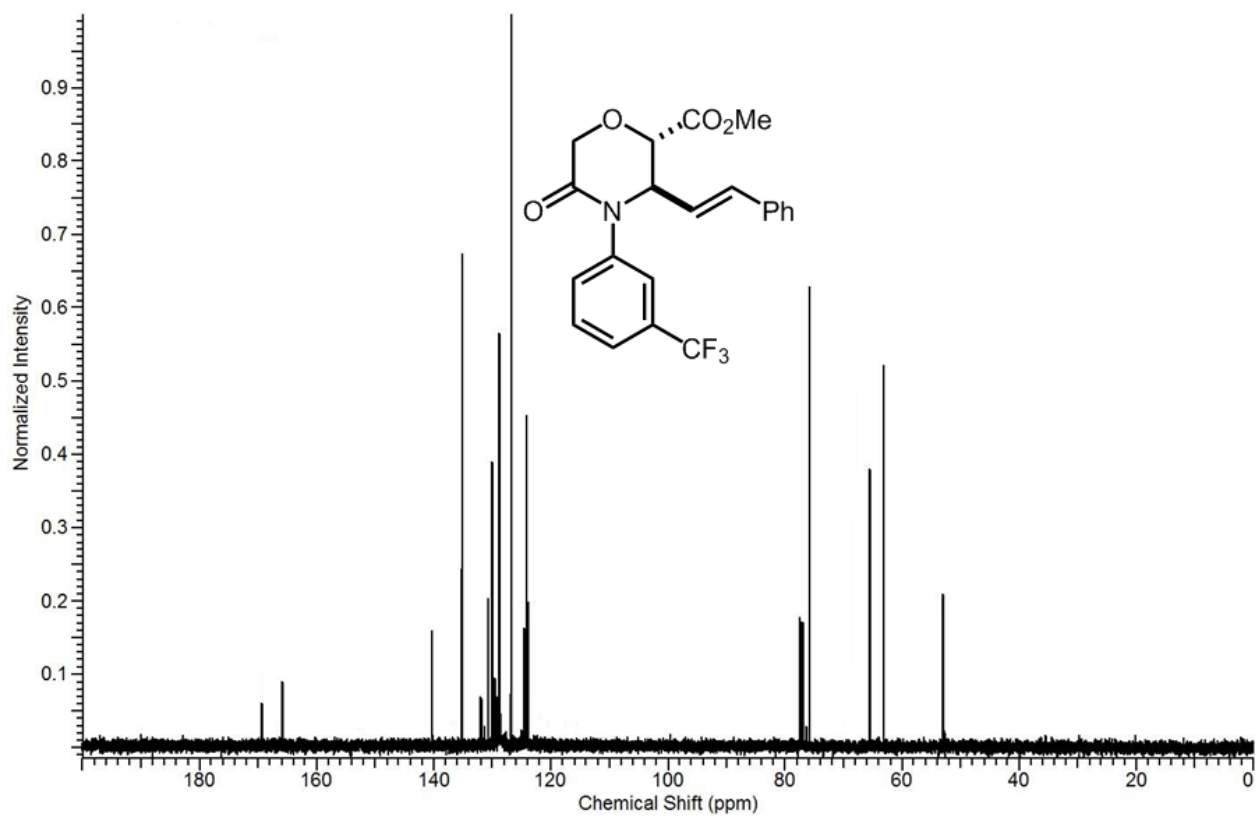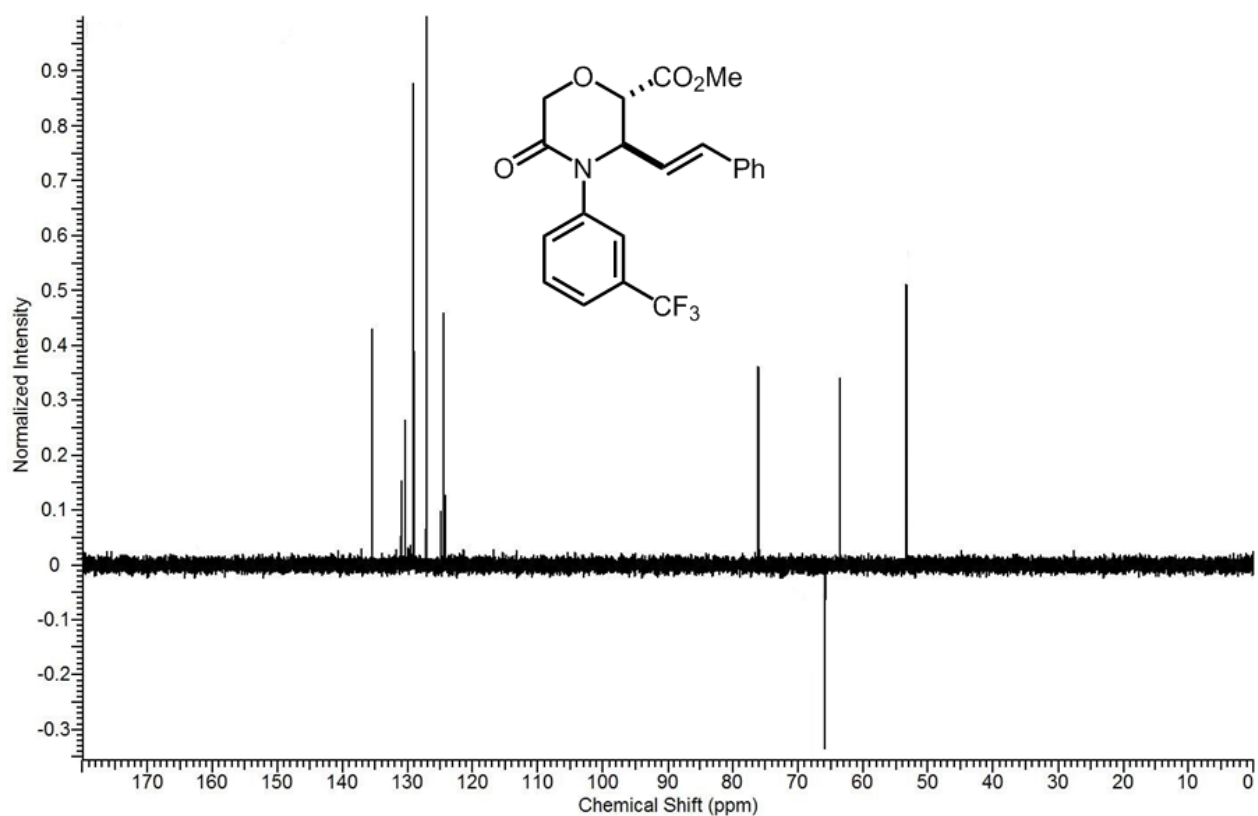

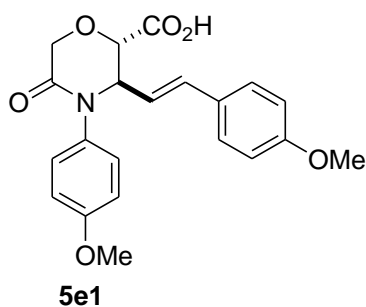

Prepared from imine **4f** (267 mg, 1.0 mmol) and diglycolic anhydride (128 mg, 1.1 equiv), using General Procedure B. T = 90 °C, time = 18 h. Yield = 314 mg, 82%.  $^1\text{H}$  NMR (400 MHz,  $\text{CDCl}_3$ )  $\delta$  11.08 (1H, s, br), 7.51 to 6.77 (8H, m), 6.37 to 6.13 (2H, m), 4.81 to 4.20 (4H, m), 3.76 to 3.67 (6H, overlapping singlets).  $^{13}\text{C}$  NMR (101 MHz,  $\text{CDCl}_3$ )  $\delta$  173.9, 167.5, 159.8, 158.9, 136.2, 134.1, 132.2, 130.0, 129.3, 129.1, 128.7, 128.4, 128.3, 128.3, 128.1, 125.4, 122.2, 122.1, 114.2, 114.1, 75.9, 68.1, 64.4, 63.8, 55.4, 55.3. **HRMS- $\text{EI}^+$**  ( $m/z$ ): calc'd for  $\text{C}_{21}\text{H}_{21}\text{NO}_6$  383.1369; found 383.1376.

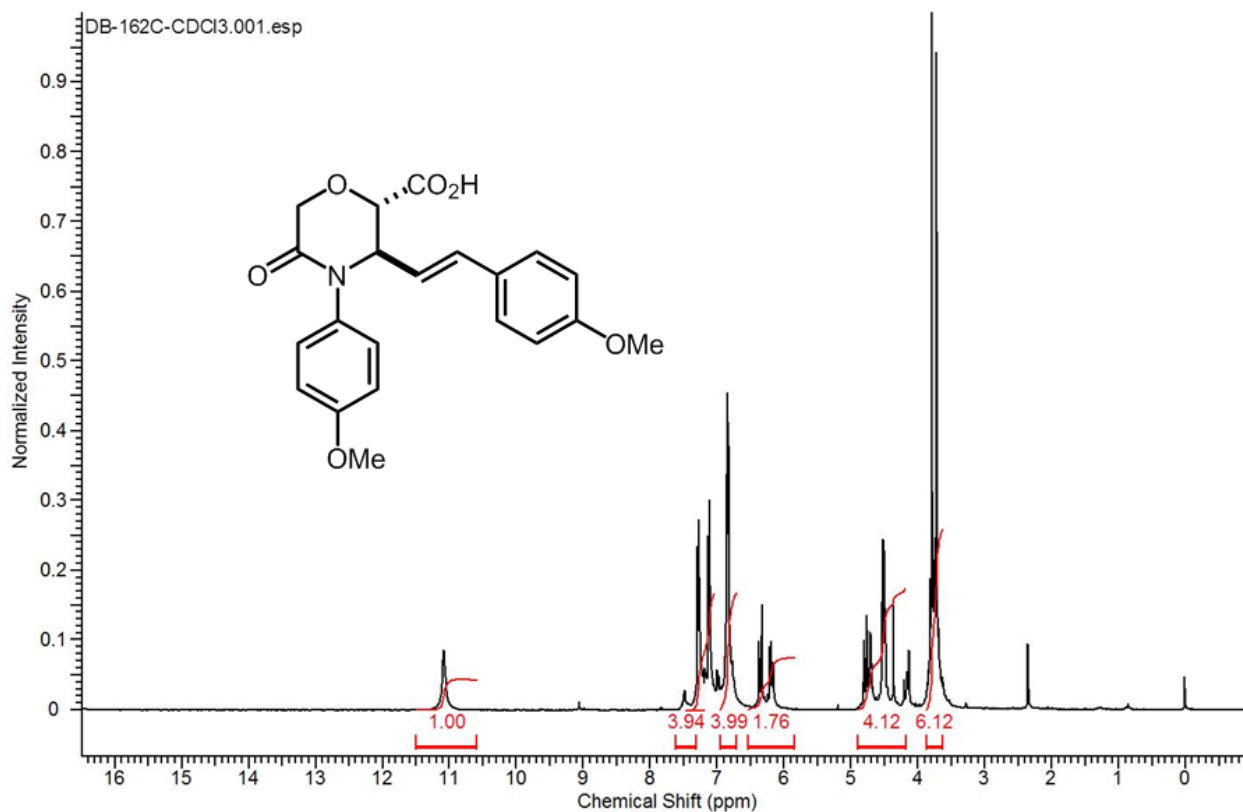

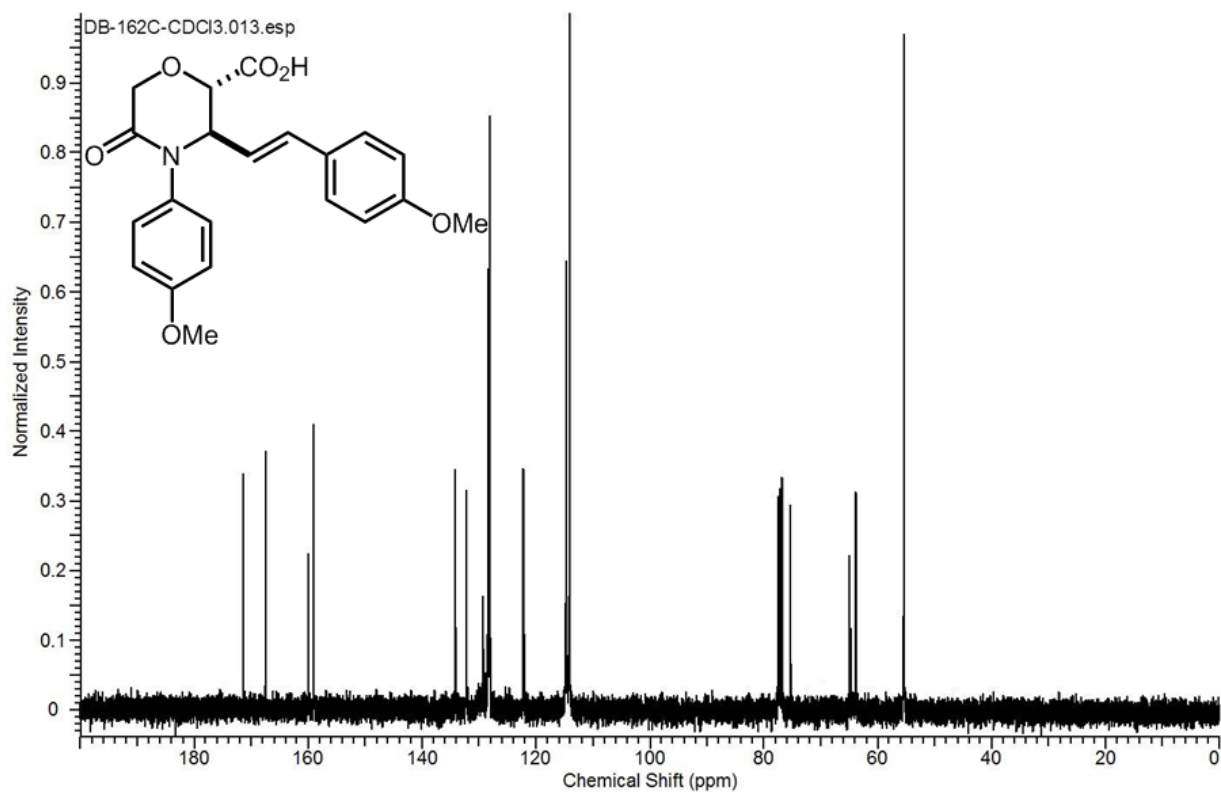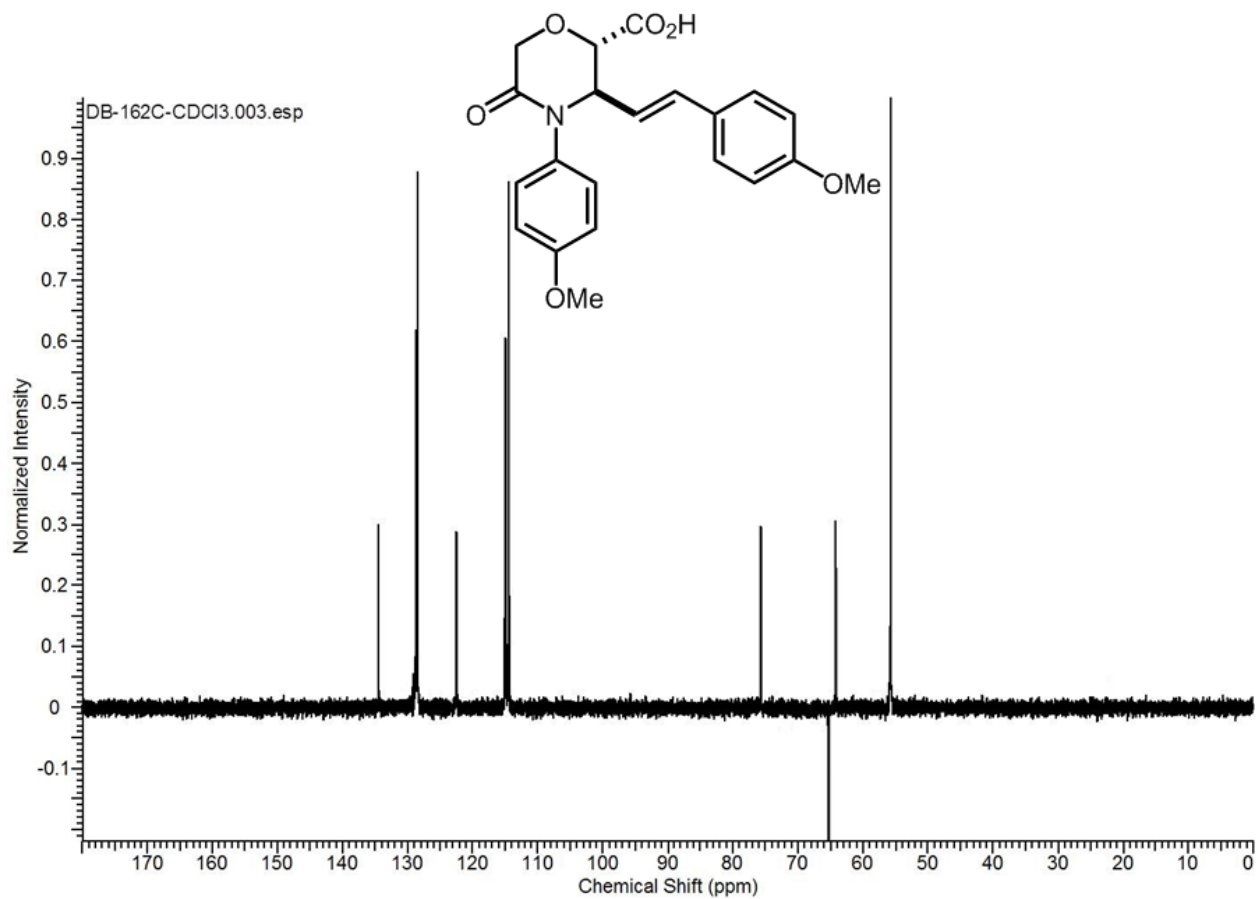

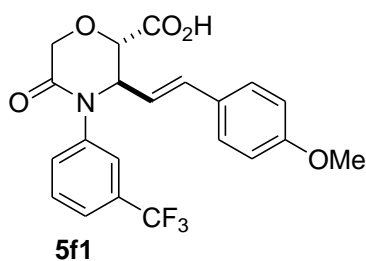

Prepared from imine **4h** (305 mg, 1.0 mmol) and diglycolic anhydride (128 mg, 1.1 equiv) using General Procedure B. T = 100 °C, time = 22 h. Yield = 295 mg, 70%.  $^1\text{H}$  NMR (400 MHz, MeOH)  $\delta$  7.61 to 7.49 (4H, m) 7.32 (2H, d), 6.83 (2H, d), 6.44 to 6.29 (2H, m), 4.87 to 4.23 (4H, m), 3.76 (3H, s).  $^{13}\text{C}$  NMR (101 MHz, MeOH)  $\delta$  170.8, 167.3, 160.0, 140.6, 134.1, 132.5, 131.0, 130.8, 129.9, 129.6, 129.4, 128.4, 127.7, 124.2, 124.1, 124.0, 123.2, 122.1, 113.7, 75.6, 64.8, 63.8, 54.3. **HRMS- $\text{EI}^+$**  ( $m/z$ ): calc'd for  $\text{C}_{21}\text{H}_{18}\text{F}_3\text{NO}_5$  421.1137; found 421.1143.

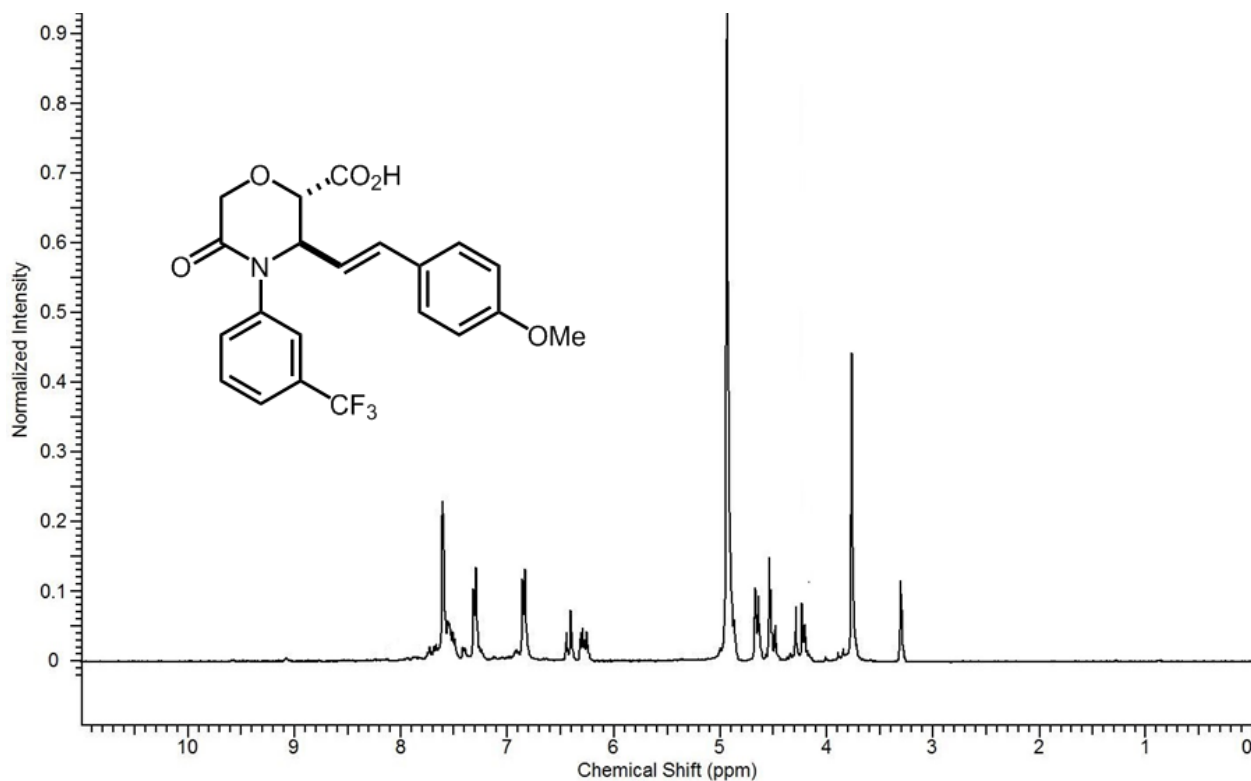

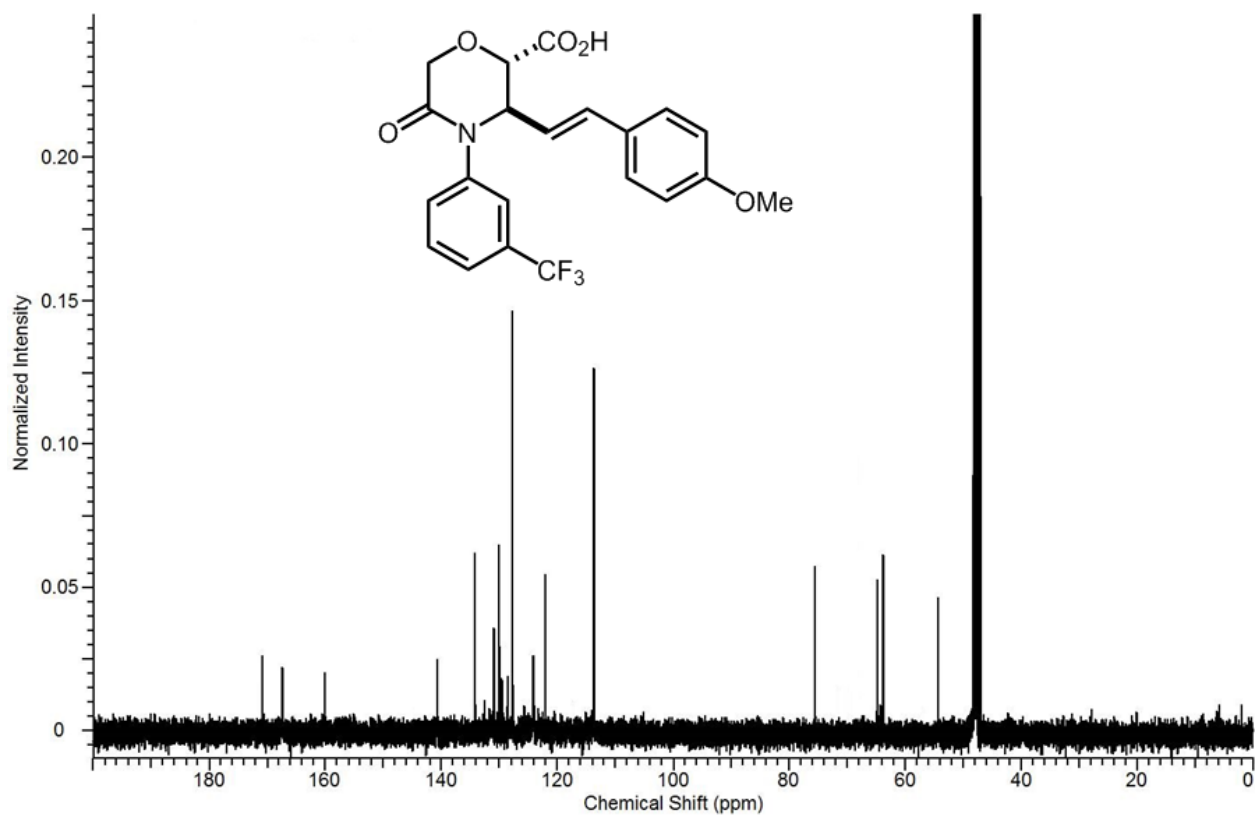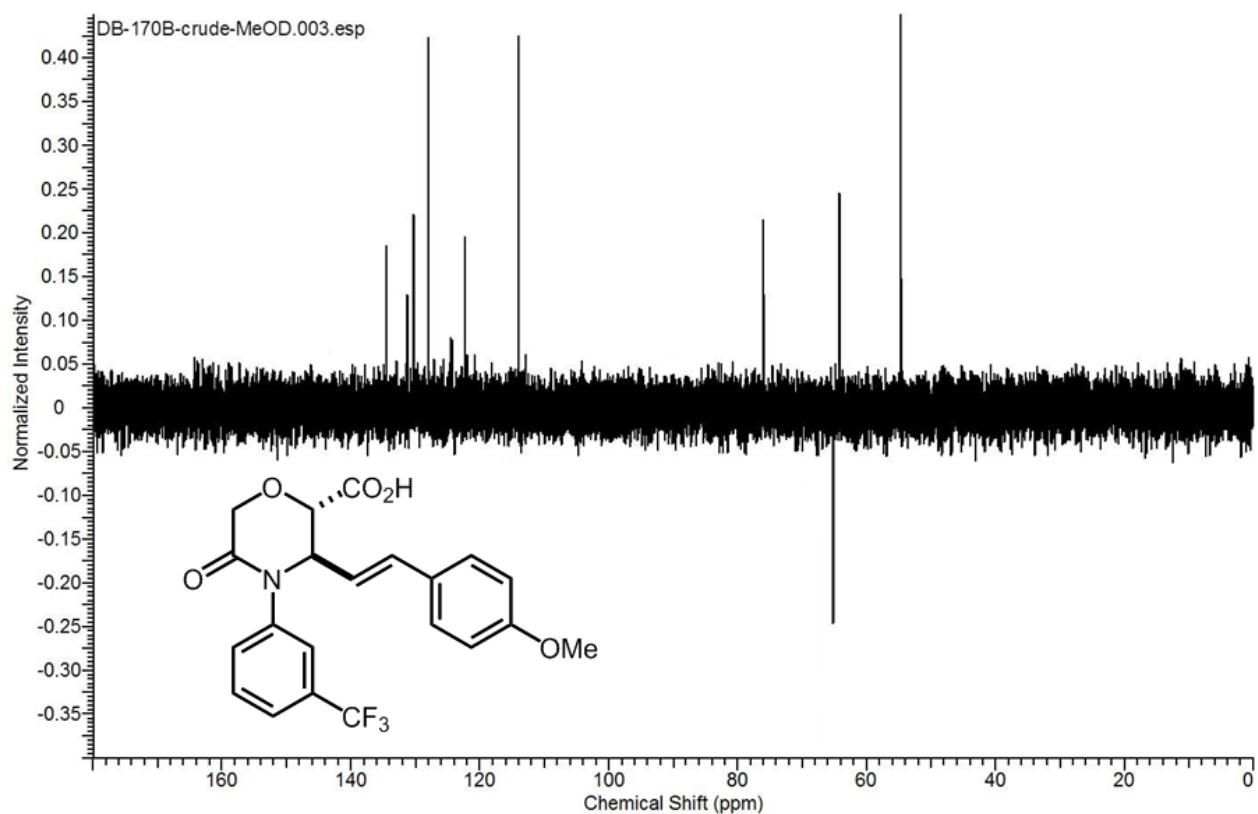

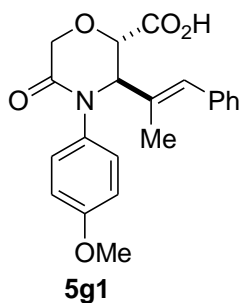

Prepared from imine **4i** (251 mg, 1.0 mmol) and diglycolic anhydride (128 mg, 1.1 equiv) using General Procedure B. T = 90 °C, time = 22 h. Yield = 290 mg, 79%.  $^1\text{H}$  NMR (400 MHz,  $\text{CDCl}_3$ )  $\delta$  13.10 (1H, s, br), 7.36 to 6.83 (9H, m), 6.49 (1H, s), 4.77 to 4.12 (4H, dd), 3.72 (3H, s), 1.86 (3H, s).  $^{13}\text{C}$  NMR (101 MHz,  $\text{CDCl}_3$ )  $\delta$  171.8, 166.3, 159.5, 136.9, 133.8, 131.4, 130.2, 129.3, 129.2, 128.2, 127.9, 126.1, 114.5, 74.3, 65.3, 55.8, 15.7. **HRMS- $\text{EI}^+$**  ( $m/z$ ): calc'd for  $\text{C}_{21}\text{H}_{21}\text{NO}_6$  383.1369; found 383.1376.

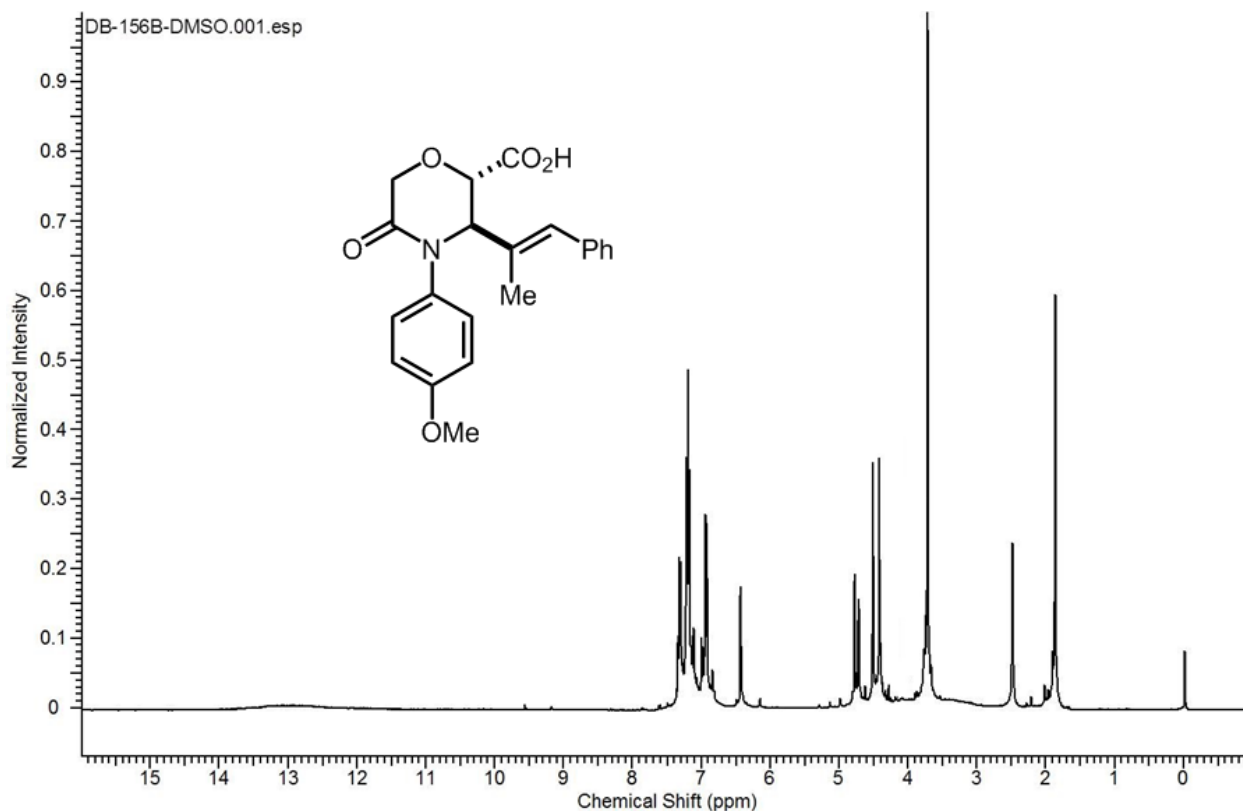



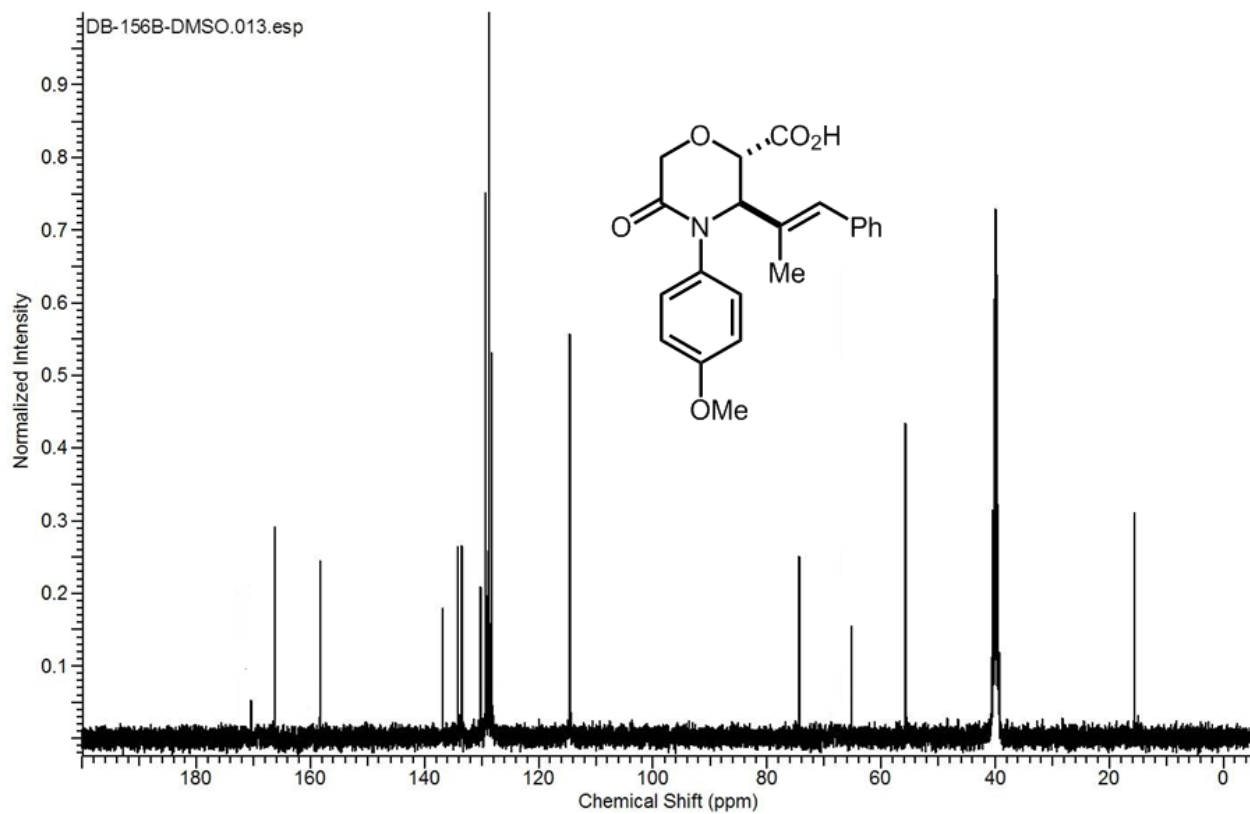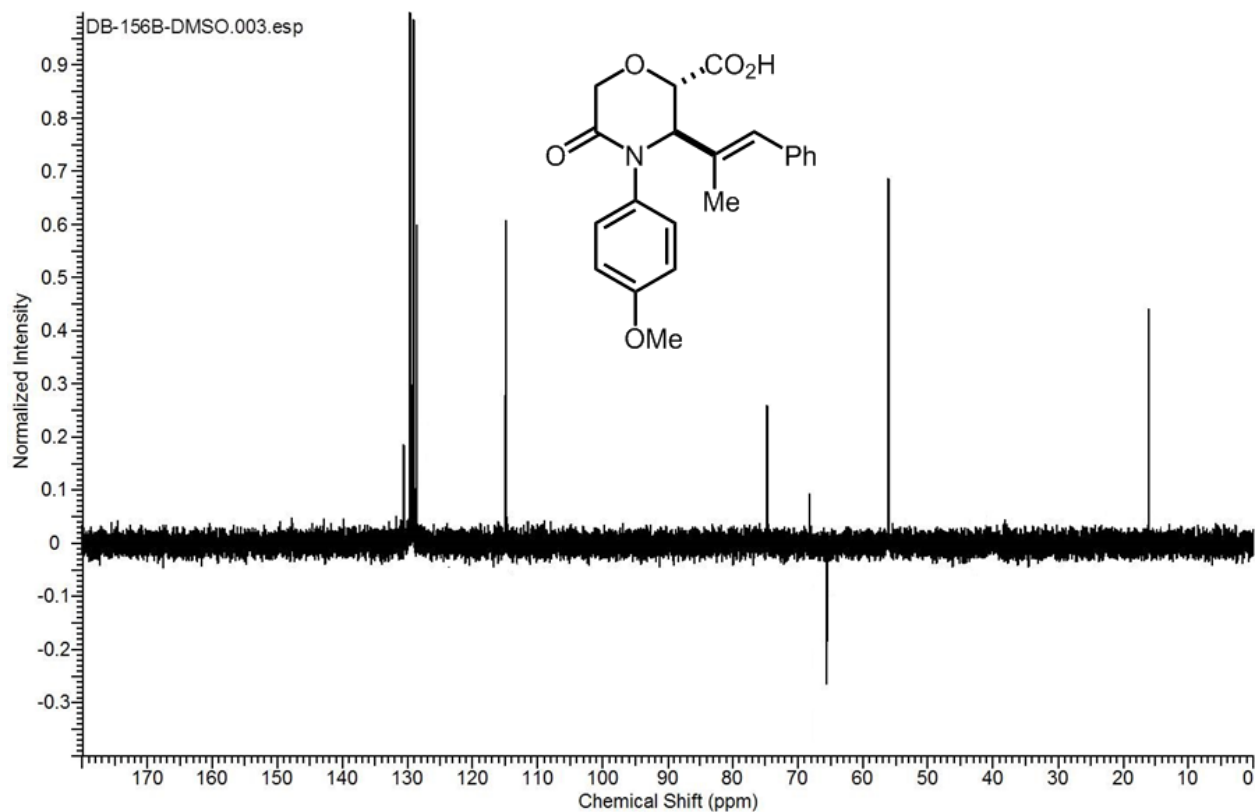

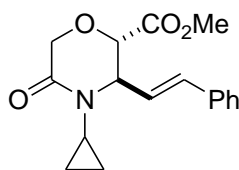**5h2**

Prepared from imine **4k** (171 mg, 1.0 mmol) and diglycolic anhydride (128 mg, 1.1 equiv) using General Procedures B and C. T = 90 °C, time = 12 h. Yield = 217 mg, 72%, 80:20 dr.  $^1\text{H}$  NMR (400 MHz,  $\text{CDCl}_3$ )  $\delta$  7.45 to 7.25 (10H, m), 6.69 to 6.56 (2H, dd), 6.26 to 6.14 (2H, dd), 4.51 to 4.00 (8H, dd), 3.80 to 3.71 (6H, m), 2.65 to 2.60 (2H, m), 0.99 to 0.48 (8H, m).  $^{13}\text{C}$  NMR (101 MHz,  $\text{CDCl}_3$ )  $\delta$  170.1, 169.5, 167.8, 167.3, 135.6, 135.6, 133.9, 128.7, 128.7, 128.5, 128.4, 126.8, 126.7, 125.1, 122.5, 76.3, 75.5, 68.7, 68.1, 60.9, 60.2, 52.7, 52.0, 28.6, 28.3, 8.5, 7.4, 6.3, 5.0. **HRMS- $\text{EI}^+$**  ( $m/z$ ): calc'd for  $\text{C}_{17}\text{H}_{19}\text{NO}_4$  301.1314; found 301.1310.

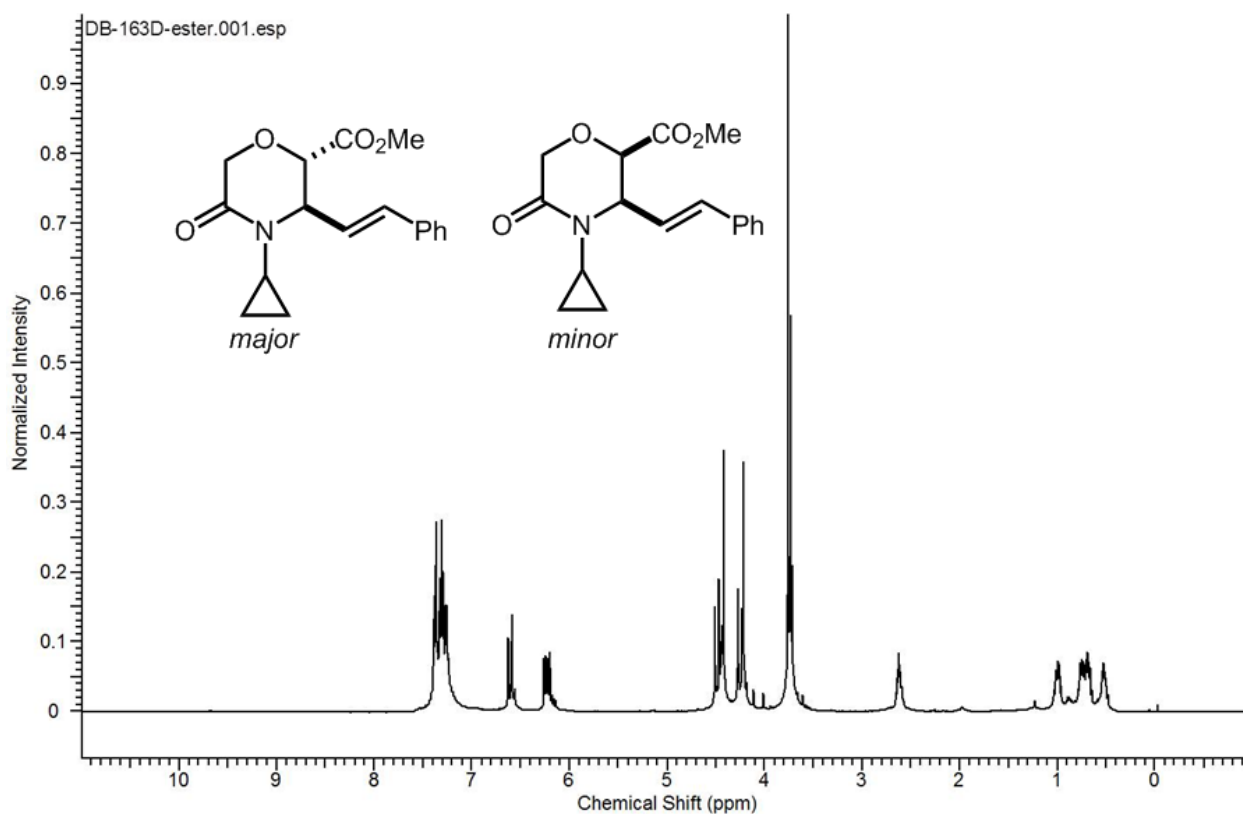

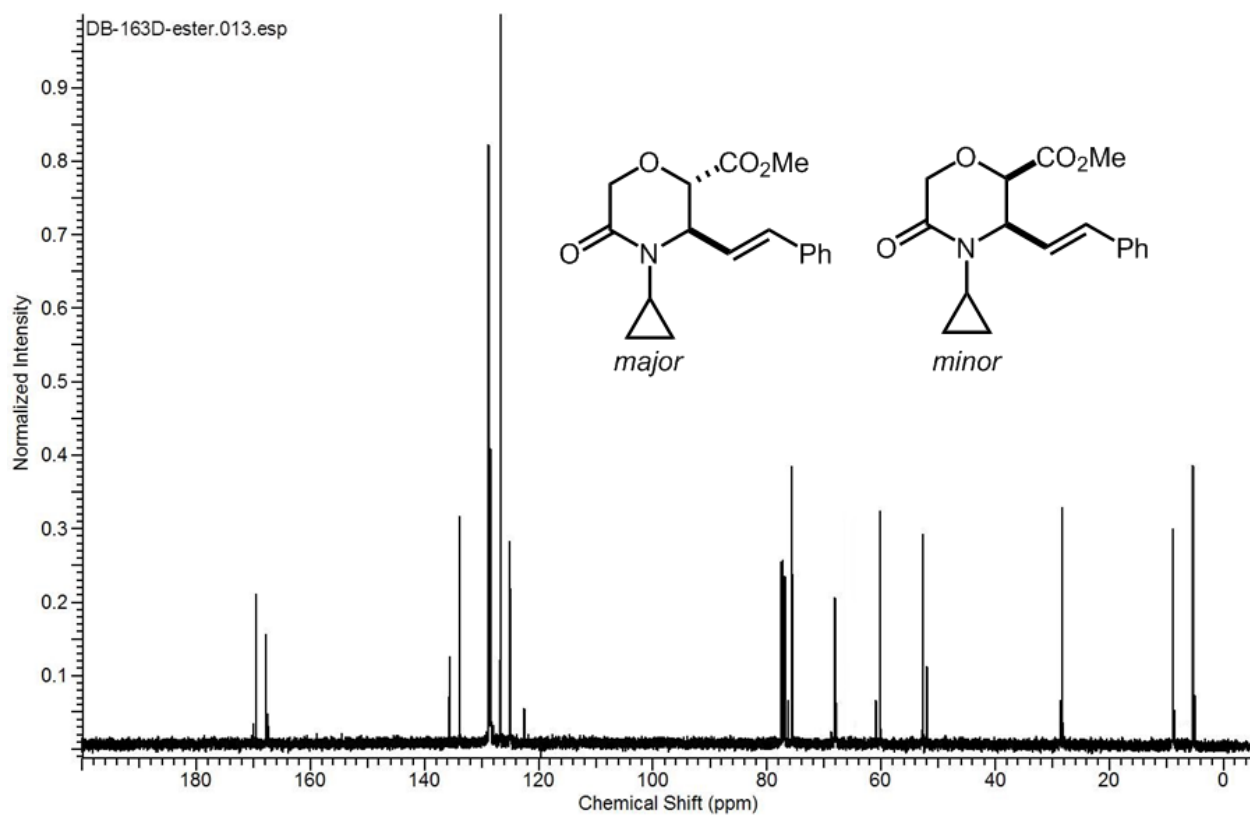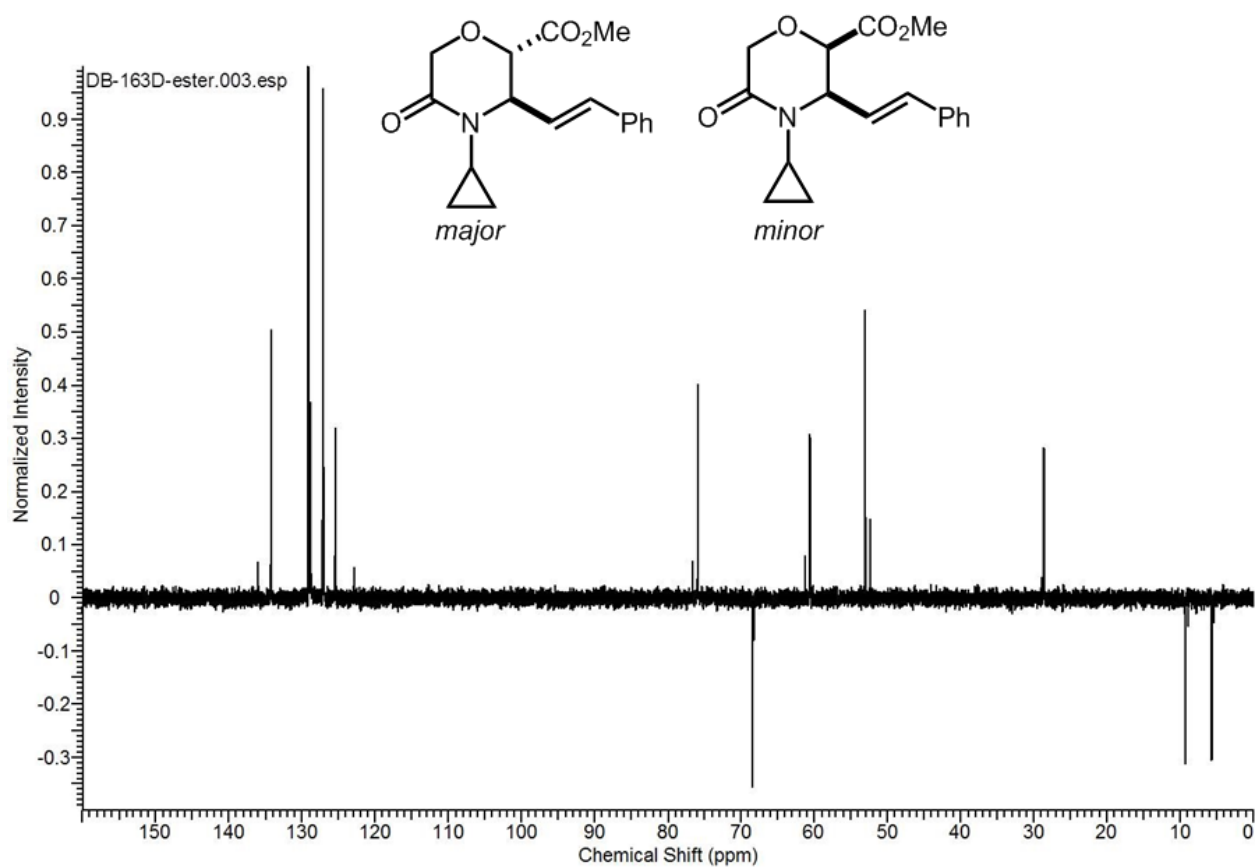

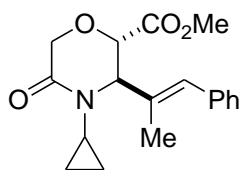**5i2**

Prepared from imine **4l** (185 mg, 1.0 mmol) and diglycolic anhydride (128 mg, 1.1 equiv) using General Procedures B and C. T = 90 °C, time = 12 h. Yield = 221 mg, 70%, 87:13 dr.  $^1\text{H}$  NMR (400 MHz,  $\text{CDCl}_3$ ) 7.54 to 7.14 (5H, m), 6.65 (1H, s), 4.60 to 4.15 (4H, m), 3.79 (3H, s), 2.65 to 2.49 (1H, m), 1.89 (3H, s), 1.07 to 0.54 (4H, m).  $^{13}\text{C}$  NMR (101 MHz,  $\text{CDCl}_3$ )  $\delta$  169.9, 168.3, 136.6, 133.4, 131.6, 130.1, 129.3, 129.0, 128.4, 127.3, 127.2, 126.8, 119.6, 76.8, 74.8, 68.2, 67.6, 65.7, 65.6, 65.1, 52.8, 52.6, 28.6, 28.4, 15.2, 14.4, 8.5, 8.3, 5.7, 5.0. **HRMS- $\text{EI}^+$**  ( $m/z$ ): calc'd for  $\text{C}_{18}\text{H}_{21}\text{NO}_4$  315.1471; found 315.1476.

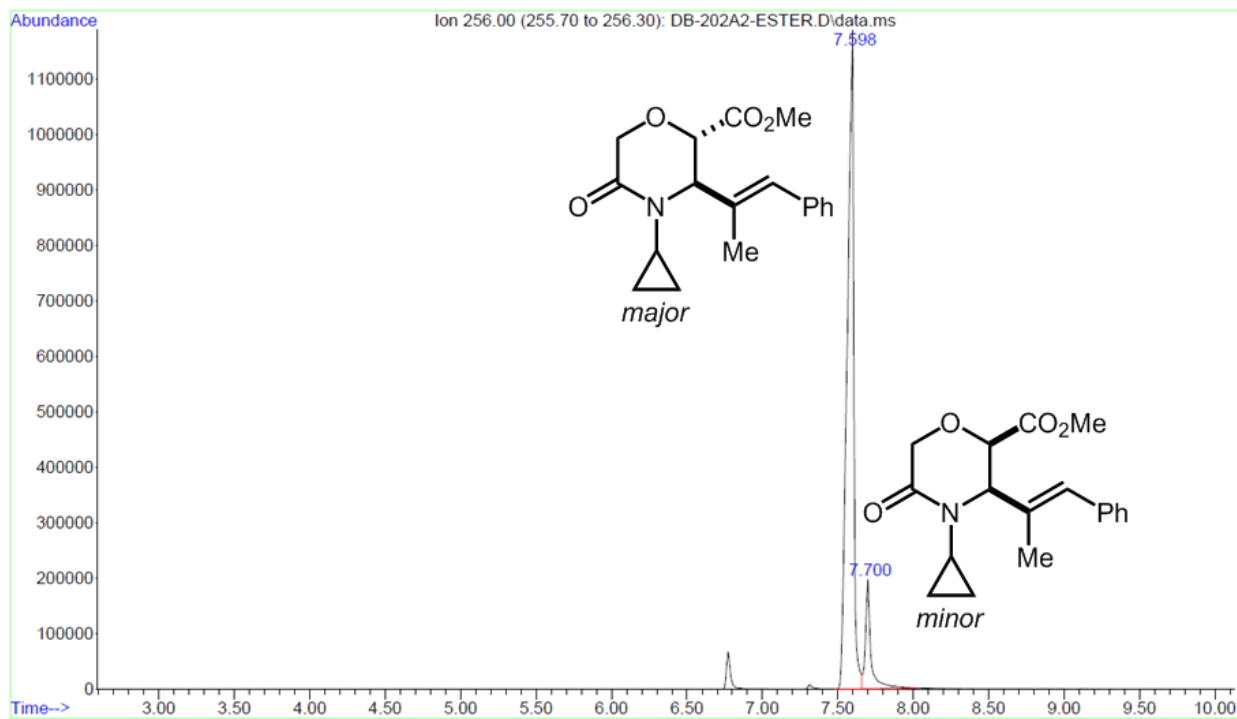

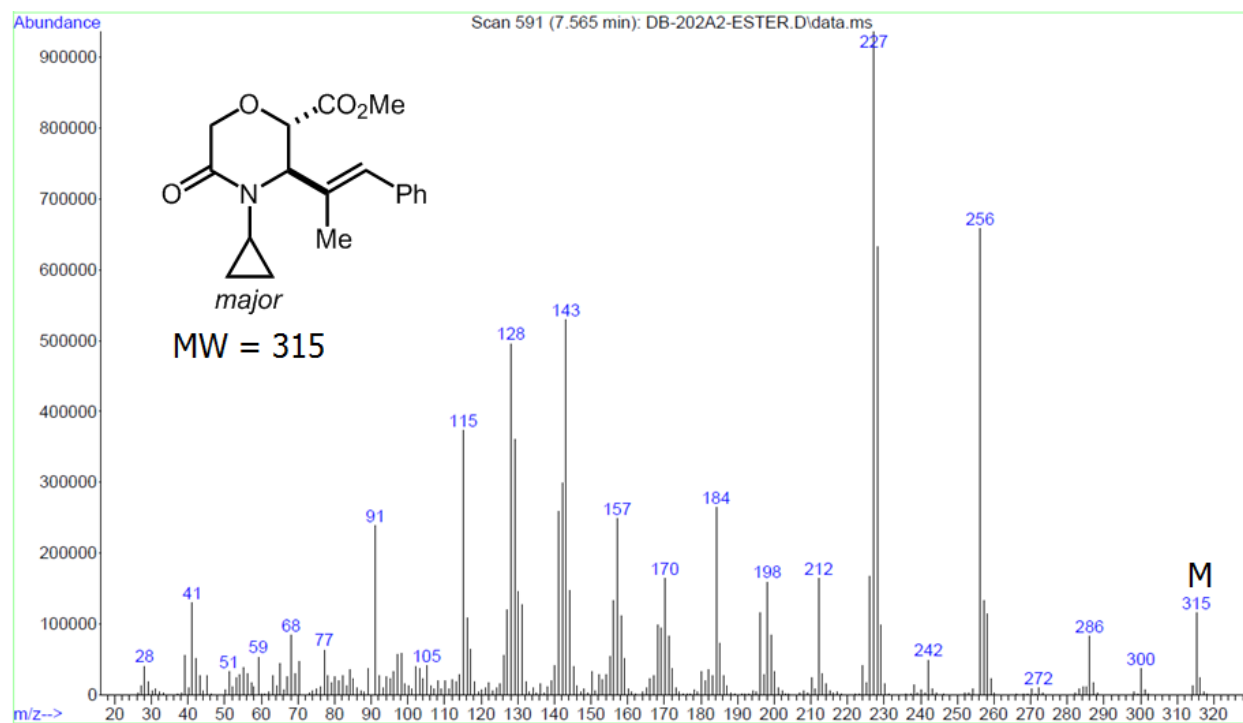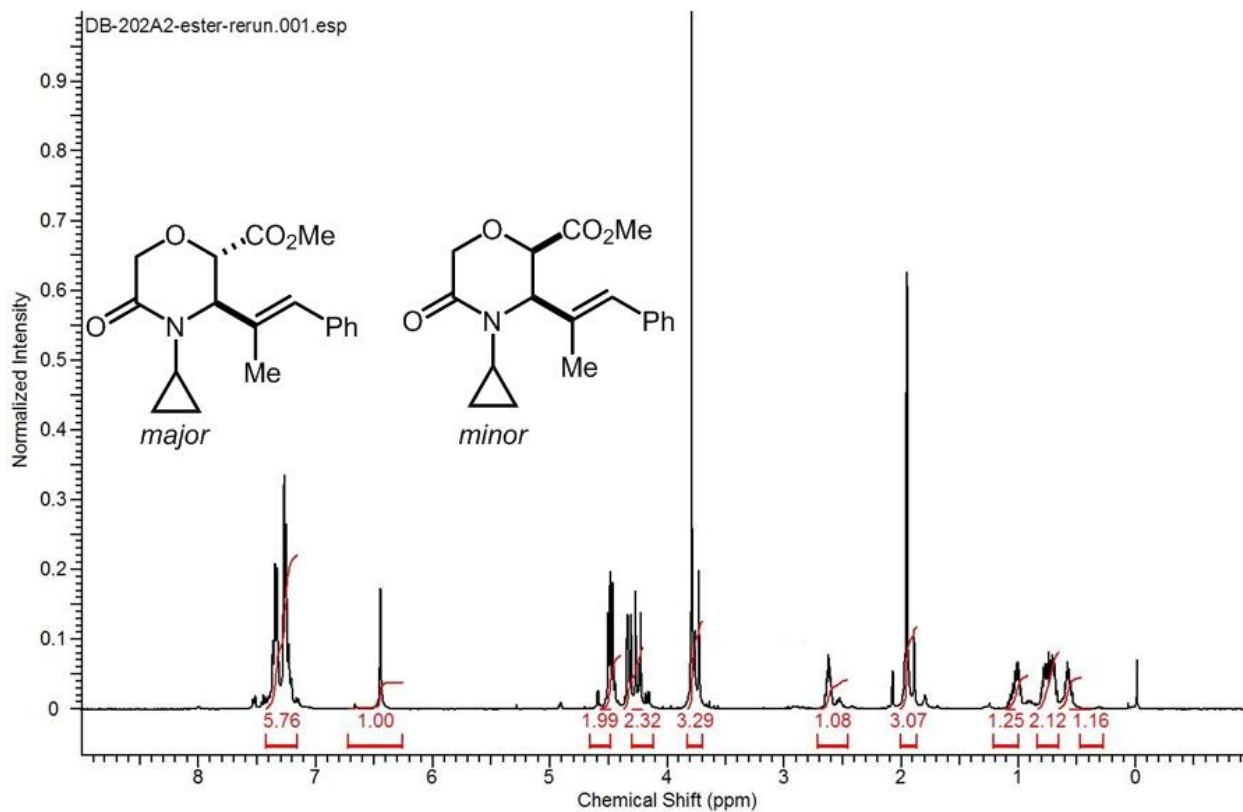

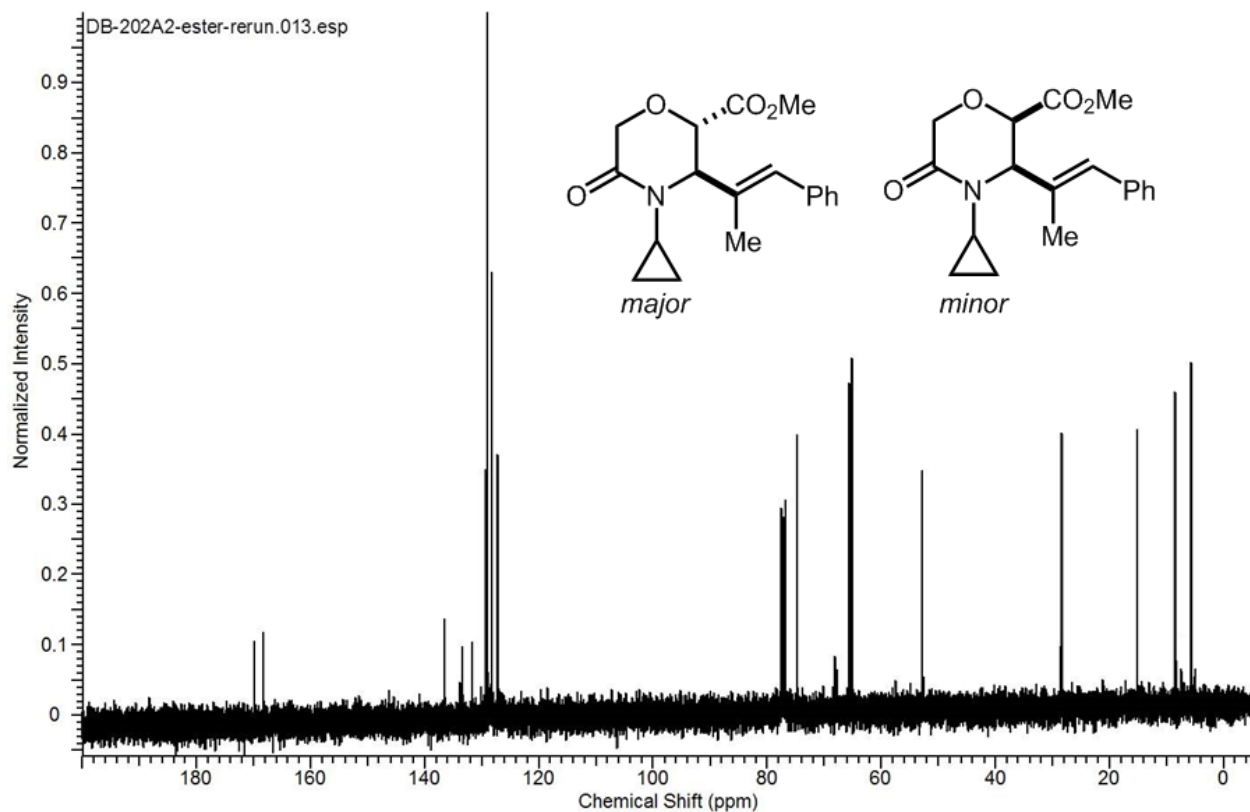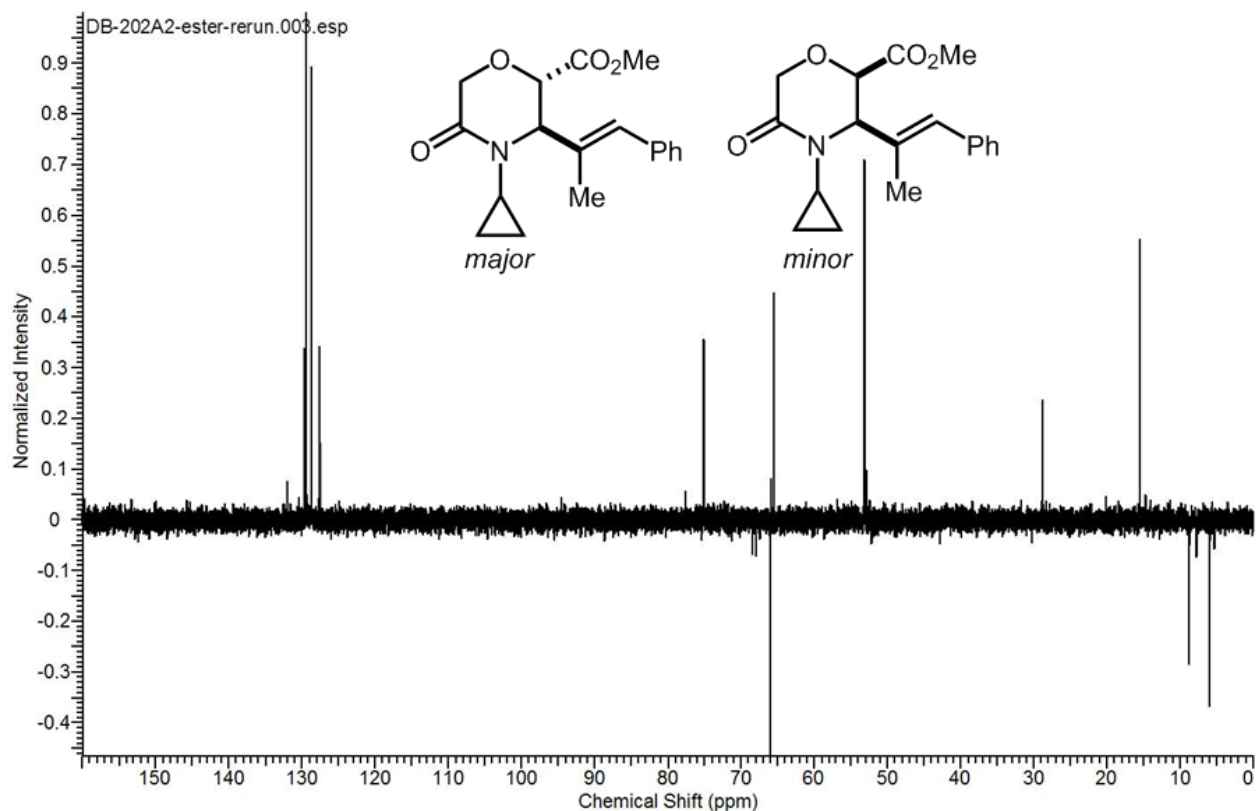

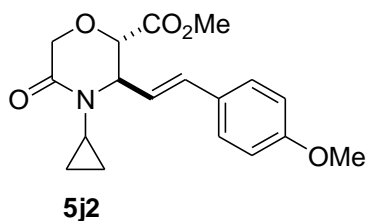

Prepared from imine **4t** (201 mg, 1.0 mmol) and diglycolic anhydride (128 mg, 1.1 equiv) using General Procedures B and C. T = 90 °C, time = 16 h. Yield = 268 mg, 81%, 85:15 dr.  $^1\text{H}$  NMR (400 MHz,  $\text{CDCl}_3$ )  $\delta$  7.47 to 7.22 (4H, major & minor), 6.89 to 6.72 (4H, mixture), 6.56 to 6.47 (2H, mixture), 6.18 to 5.96 (2H, mixture), 4.47 to 4.09 (8H, mixture), 3.80 to 3.71 (6H, mixture), 2.60 to 2.47 (2H, mixture), 0.99 to 0.48 (8H, mixture).  $^{13}\text{C}$  NMR (101 MHz,  $\text{CDCl}_3$ )  $\delta$  170.43, 169.61, 167.83, 167.38, 159.89, 159.83, 135.05, 133.33, 130.39, 129.71, 128.92, 128.85, 128.31, 128.09, 127.99, 126.78, 126.47, 122.70, 120.09, 114.5, 114.4, 76.3, 75.6, 68.67, 68.05, 65.35, 61.02, 55.34, 55.29, 52.64, 52.62, 29.70, 28.55, 8.56, 7.37, 6.33, 5.34. **HRMS- $\text{EI}^+$**  ( $m/z$ ): calc'd for  $\text{C}_{18}\text{H}_{21}\text{NO}_5$  331.1420; found 331.1425.

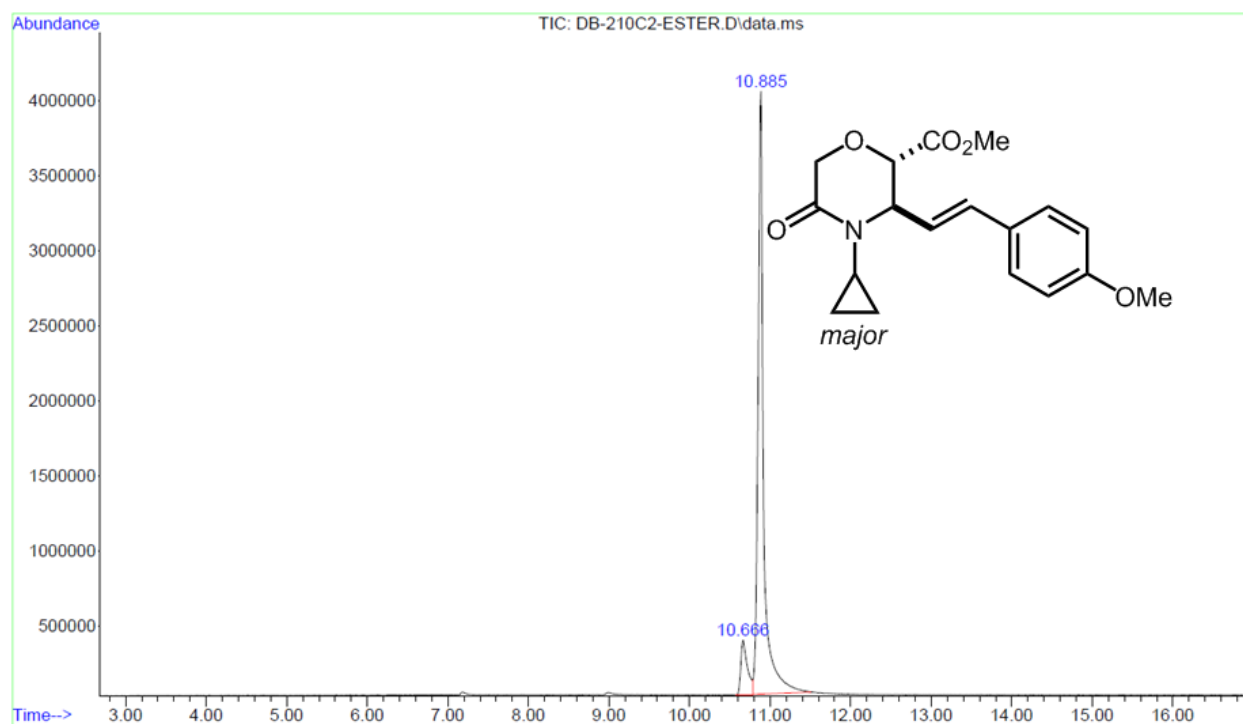

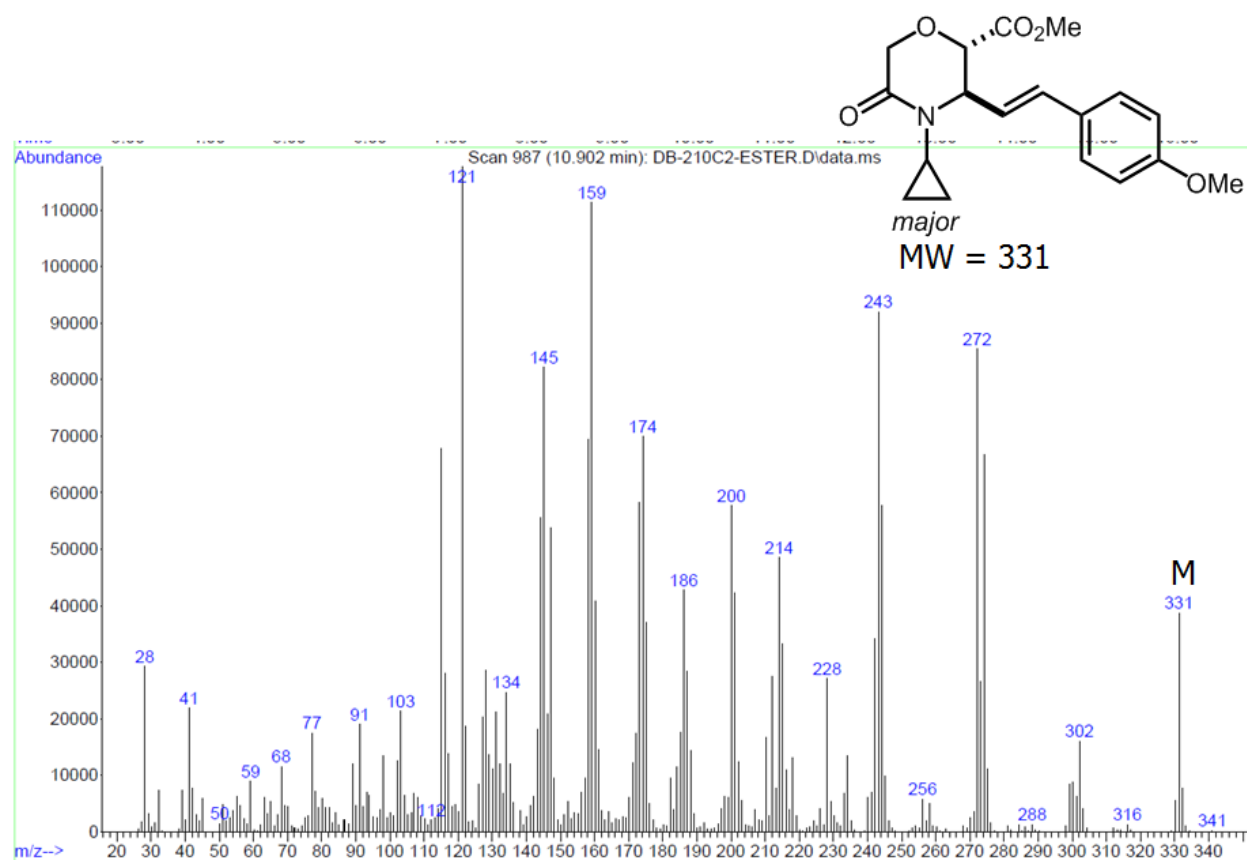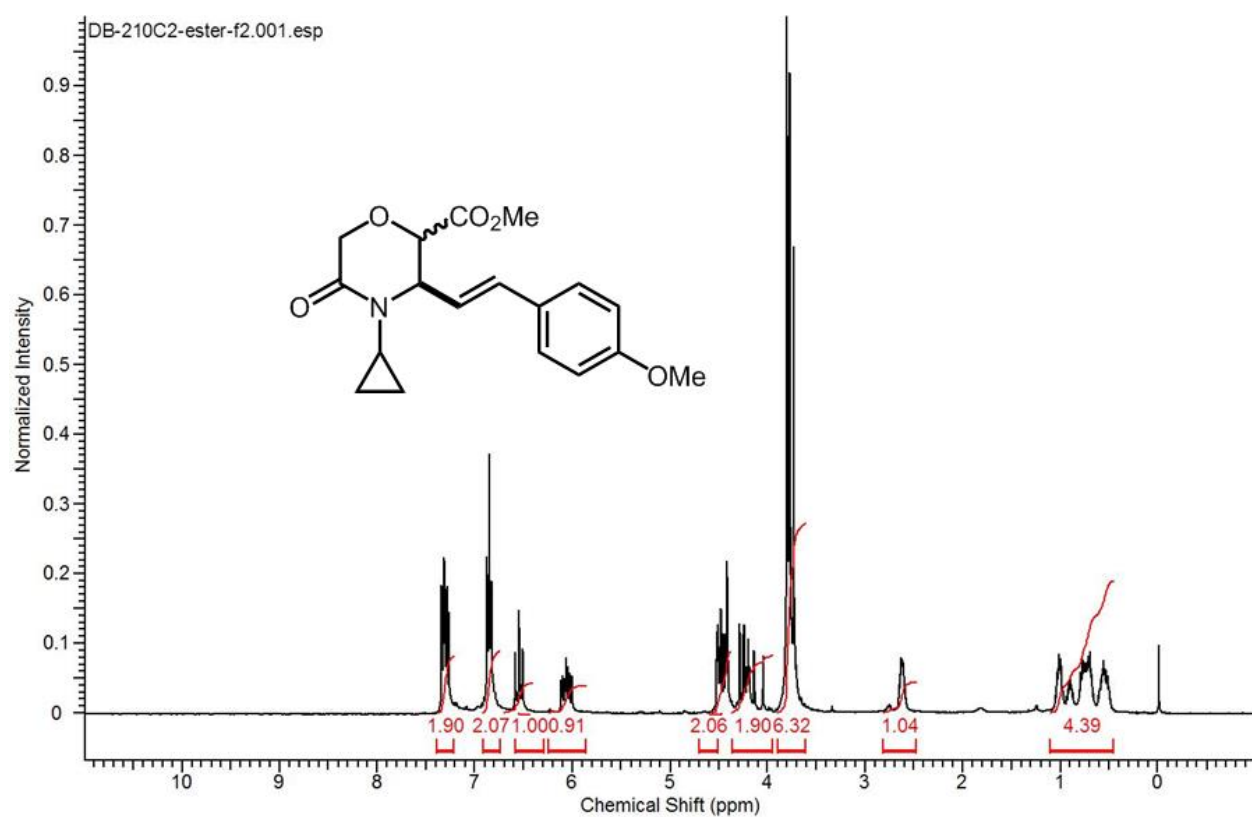



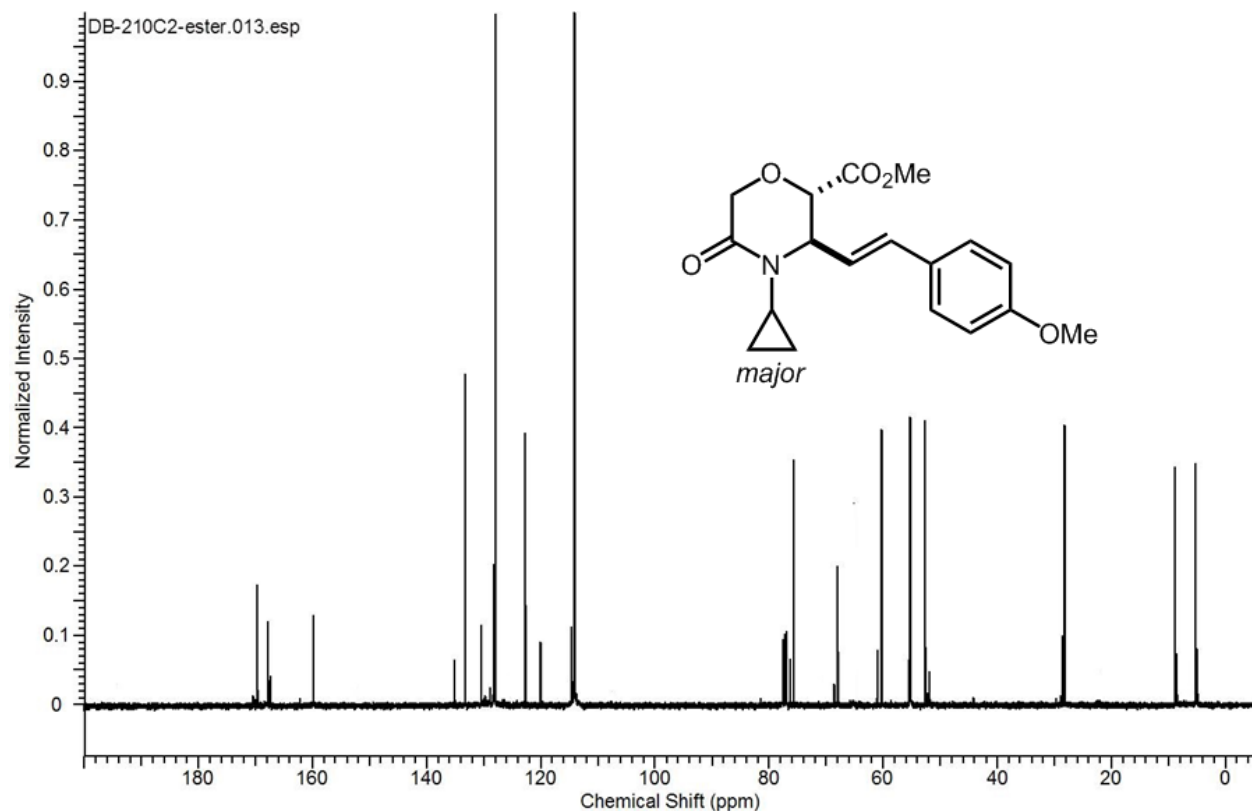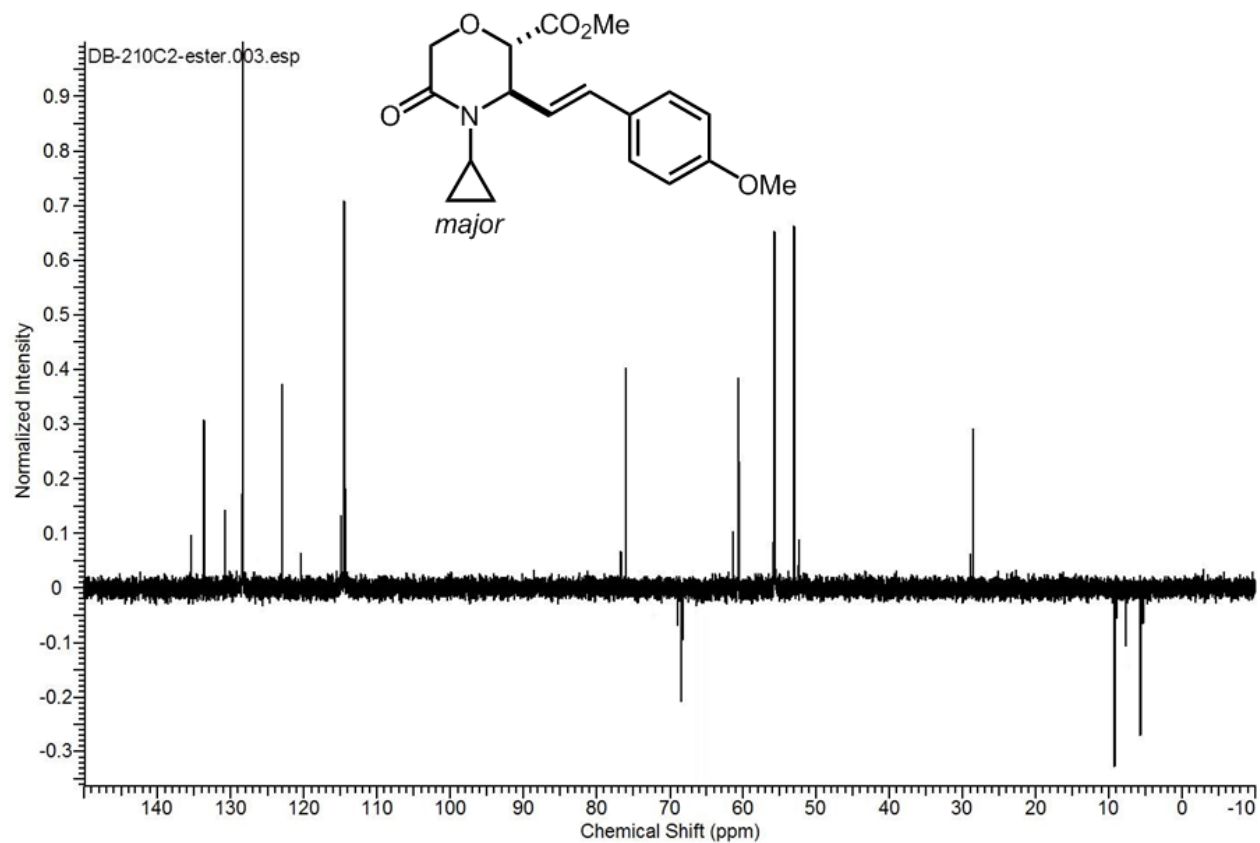

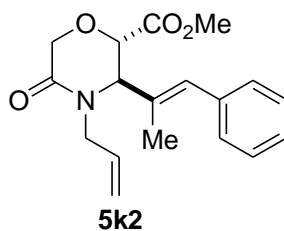

Prepared from imine **4v** (185 mg, 1.0 mmol) and diglycolic anhydride (128 mg, 1.1 equiv) using General Procedures B and C. T = 90 °C, time = 16 h. Yield = 277 mg, 88%, 92:8 dr.  $^1\text{H}$  NMR (400 MHz,  $\text{CDCl}_3$ )  $\delta$  7.45 to 6.97 (5H, m), 6.48 (1H, s), 5.81 to 5.67 (1H, m), 5.30 to 5.12 (2H, m), 4.79, to 4.21 (5H, m), 3.79 (3H, s), 3.30 to 3.22 (1H, dd), 1.84 (3H, s).  $^{13}\text{C}$  NMR (101 MHz,  $\text{CDCl}_3$ )  $\delta$  170.3, 169.7, 168.7, 166.4, 137.5, 136.4, 133.9, 132.9, 132.5, 132.3, 132.0, 131.8, 130.2, 129.8, 129.1, 129.0, 128.4, 128.2, 128.2, 128.2, 127.4, 127.3, 126.8, 126.6, 119.2, 118.9, 118.4, 116.6, 77.5, 77.4, 77.2, 76.8, 74.8, 71.3, 69.4, 68.6, 68.1, 67.8, 67.4, 65.3, 63.6, 52.7, 52.2, 52.0, 50.5, 46.4, 46.3, 41.3, 40.7, 17.2, 14.7, 14.2. **HRMS-EI+** ( $m/z$ ): calc'd for  $\text{C}_{18}\text{H}_{21}\text{NO}_4$  315.1471; found 315.1475.

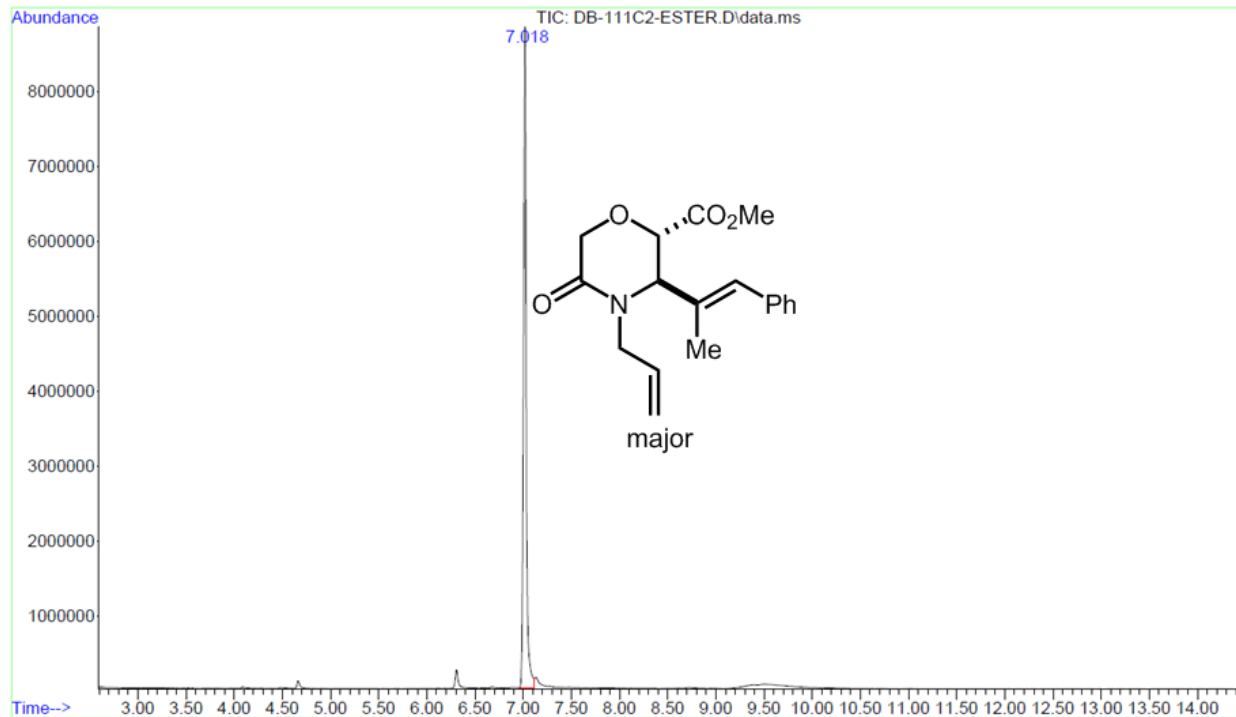

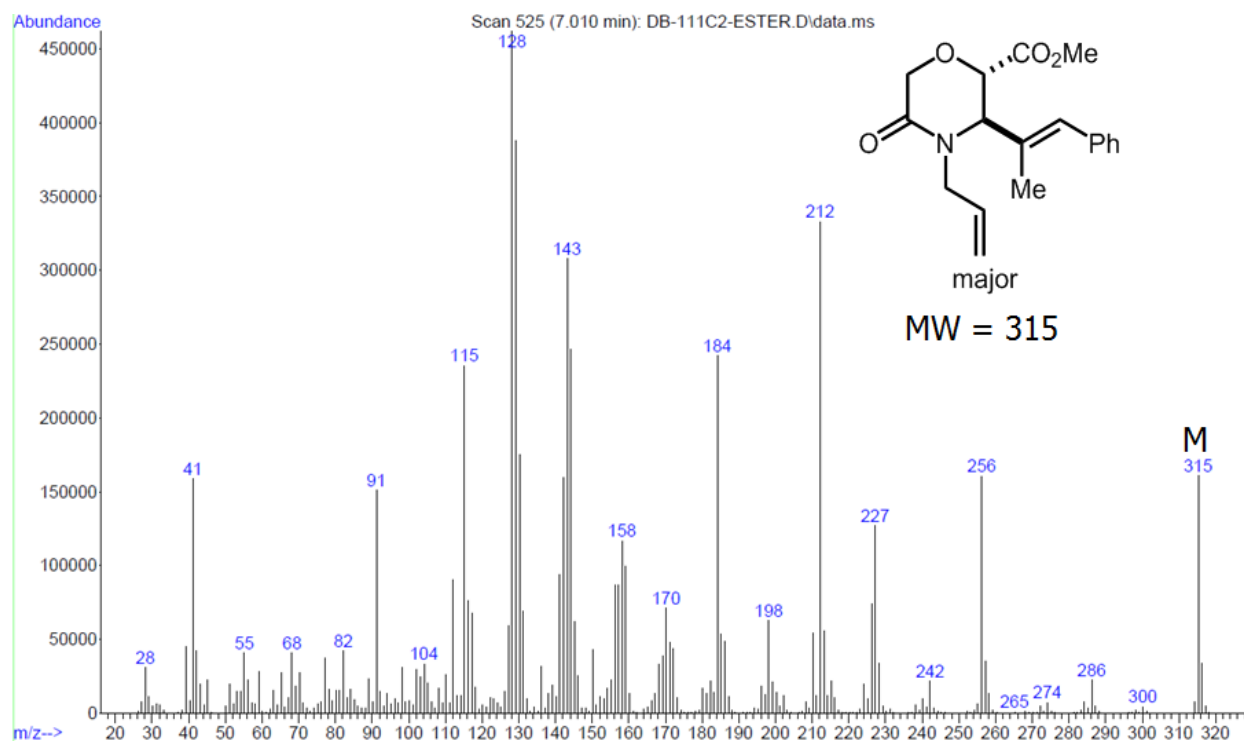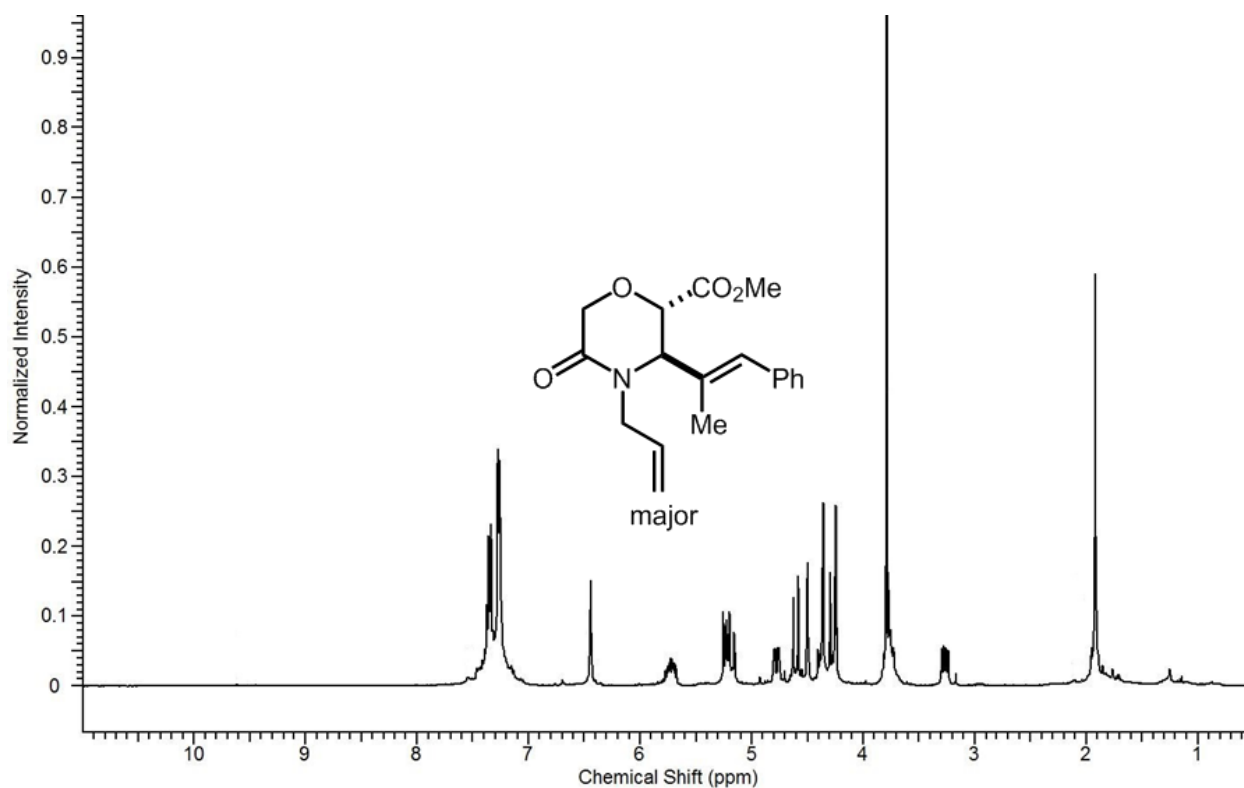

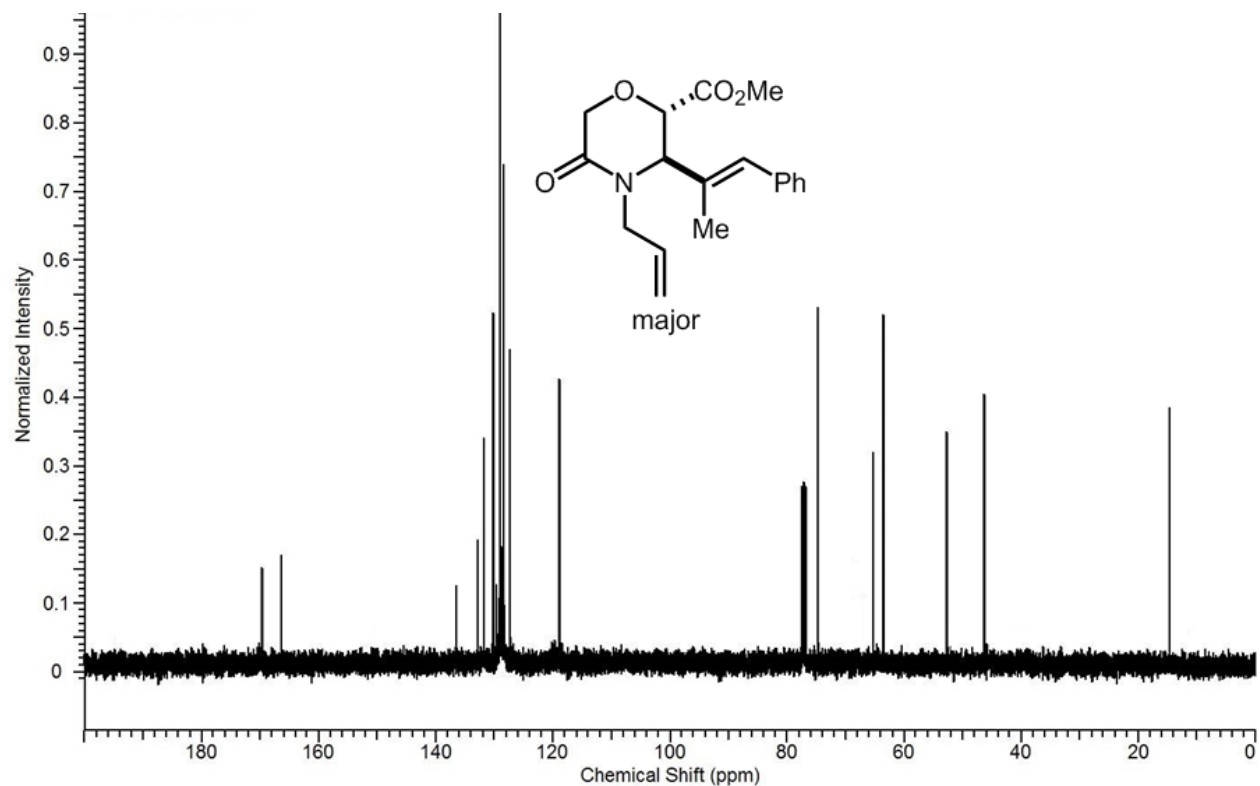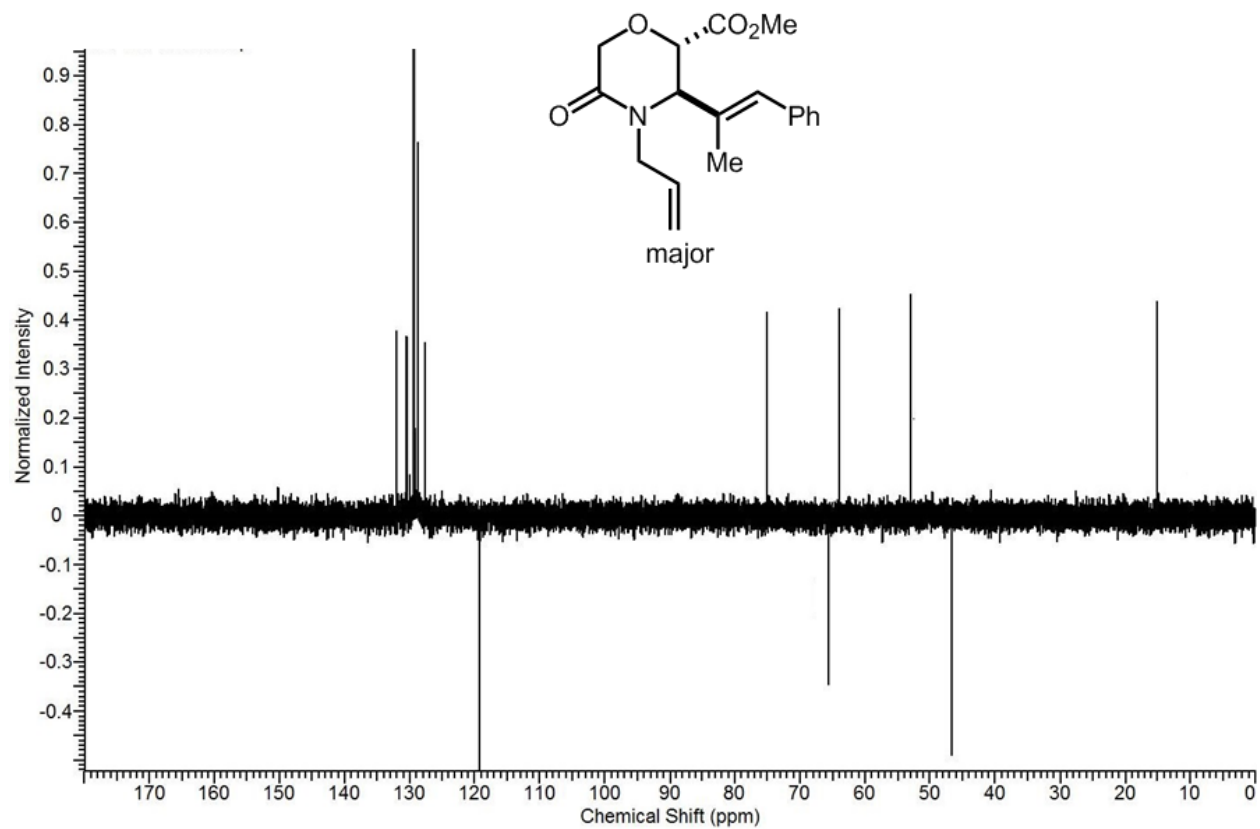

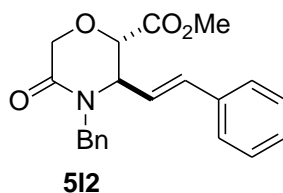

Prepared from imine **4u** (221 mg, 1.0 mmol) and diglycolic anhydride (128 mg, 1.1 equiv) using General Procedures B and C. T = 90 °C, time = 16 h. Yield = 277 mg, 79%, 95:5 dr.  $^1\text{H}$  NMR (400 MHz,  $\text{CDCl}_3$ )  $\delta$  7.60 to 6.76 (10 H, m), 6.74 to 6.70 (1H, dd), 6.59 to 6.51 (1H, dd), 5.56 (1H, d), 4.84 (1H, d), 4.42 to 4.35 (2H, m), 3.77 to 3.66 (2H, m), 3.49 (3H, s).  $^{13}\text{C}$  NMR (101 MHz,  $\text{CDCl}_3$ )  $\delta$  170.47, 166.39, 137.01, 136.39, 135.76, 134.93, 131.68, 129.51, 129.37, 129.35, 129.17, 129.03, 128.98, 128.90, 128.75, 128.21, 127.22, 127.14, 124.77, 75.45, 65.44, 58.58, 52.62, 47.07. **HRMS- $\text{EI}^+$**  ( $m/z$ ): calc'd for  $\text{C}_{21}\text{H}_{21}\text{NO}_4$  351.1471; found 351.1476.

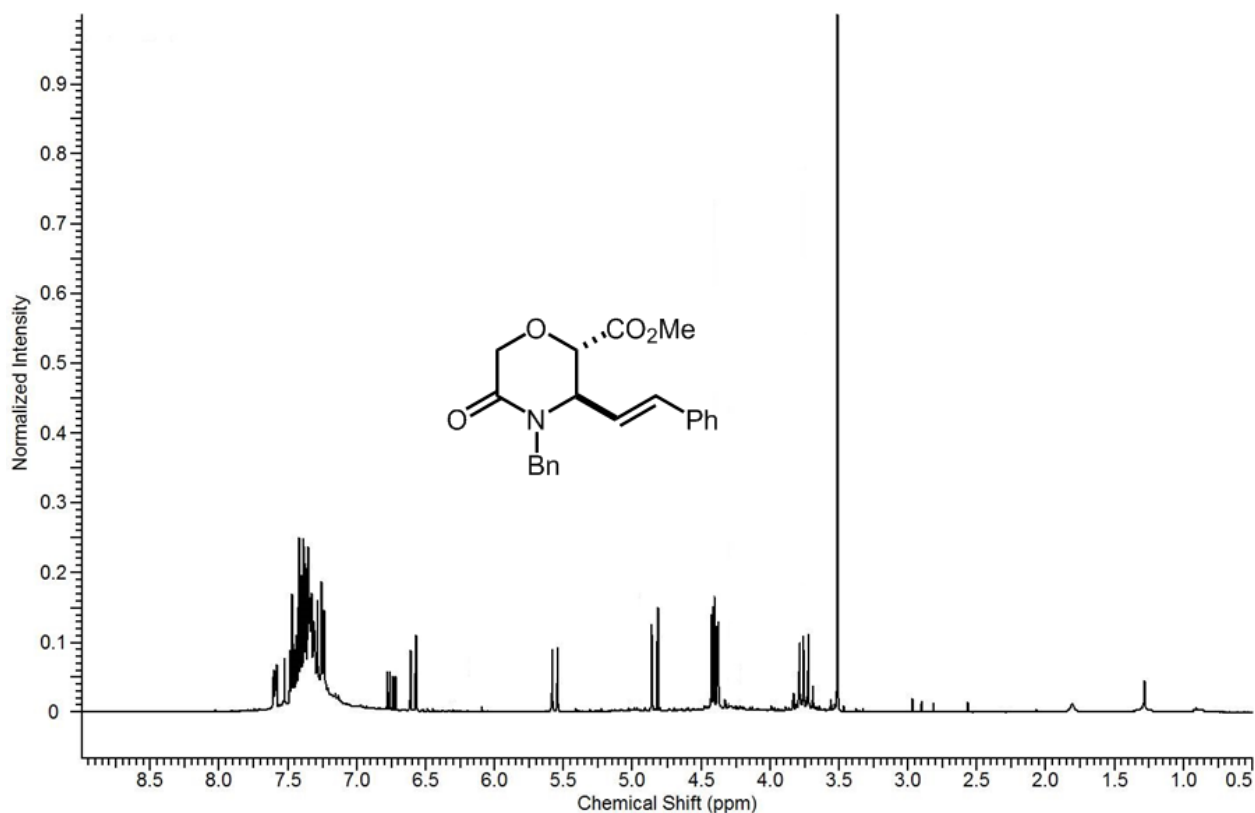

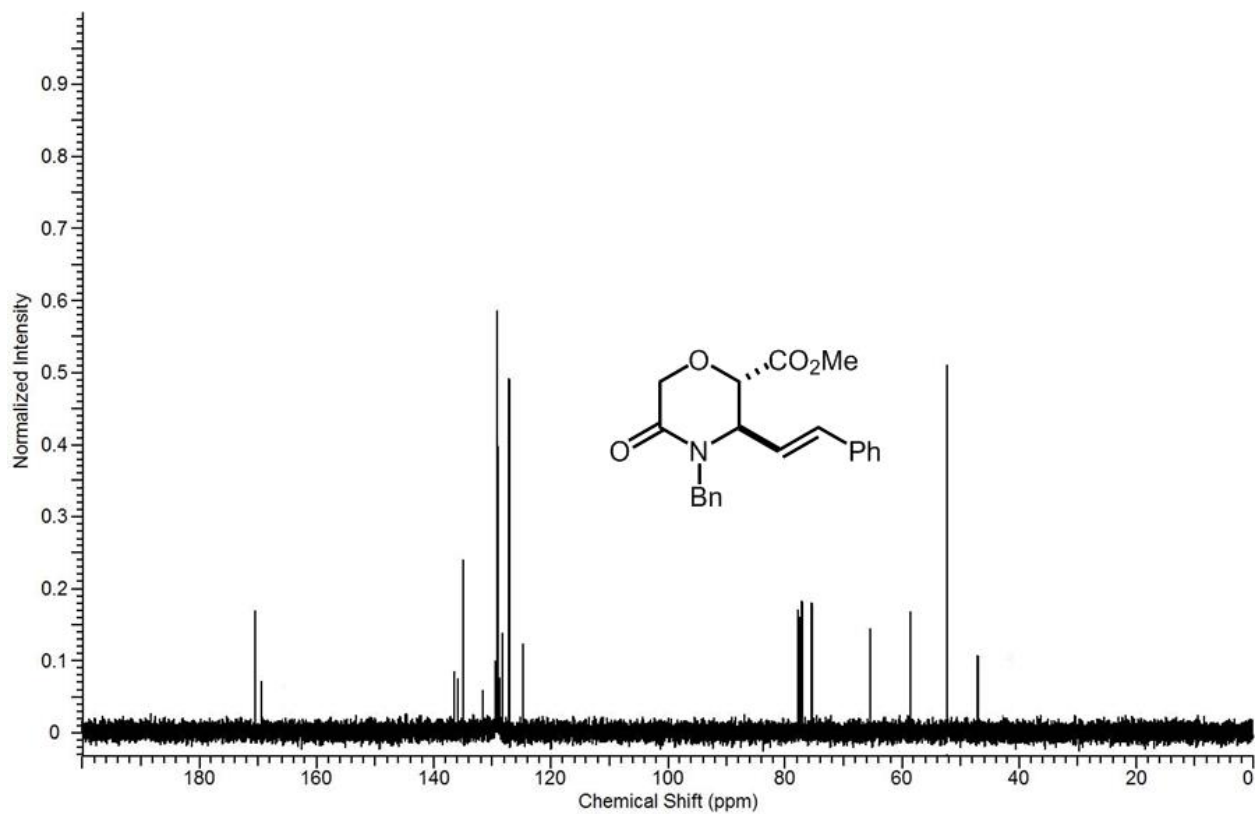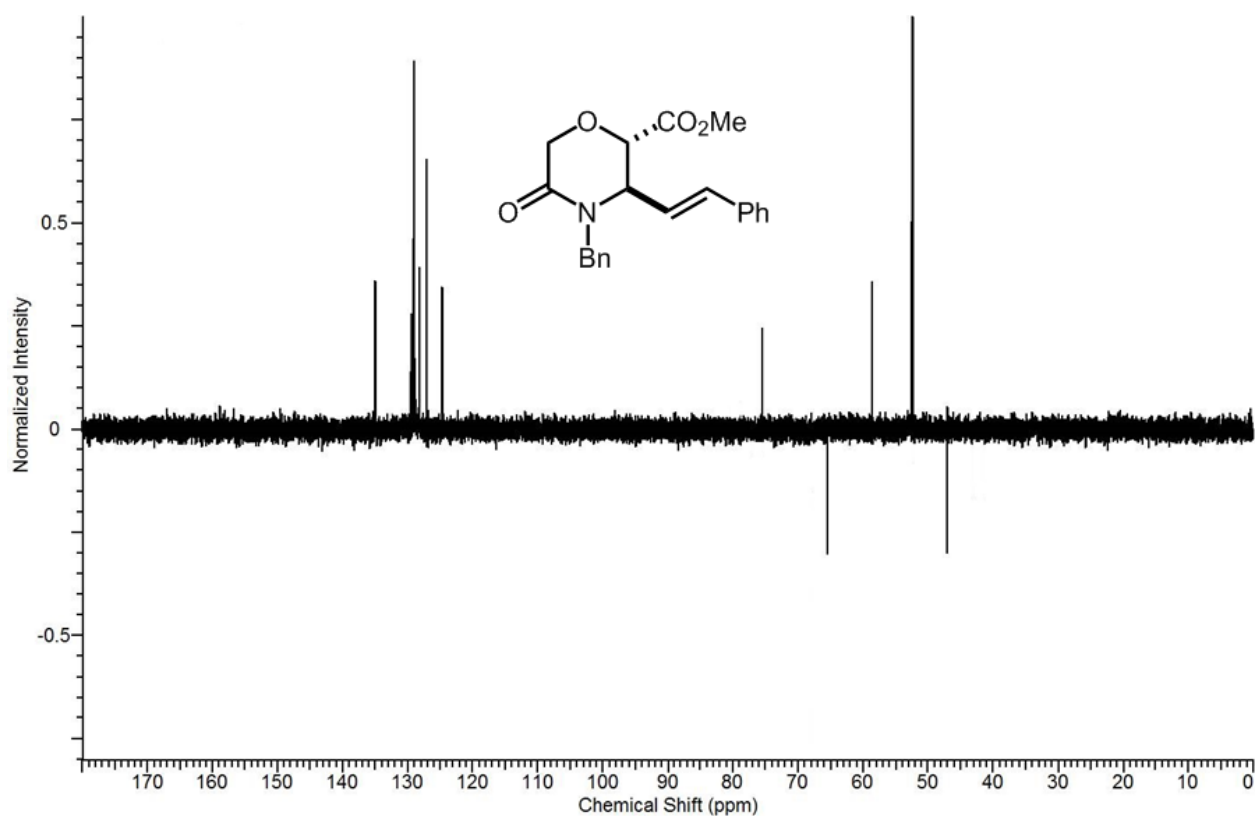

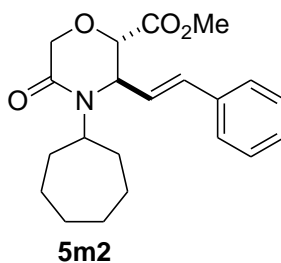

Prepared from imine **4m** (227 mg, 1.0 mmol) and diglycolic anhydride (128 mg, 1.1 equiv) using General Procedures B and C. T = 90 °C, time = 16 h. Yield = 282 mg, 79%, 81:19 dr.  $^1\text{H}$  NMR (400 MHz,  $\text{CDCl}_3$ )  $\delta$  7.57 to 7.21 (5H, m), 6.73 to 6.51 (1H, dd), 6.33 to 6.14 (1H, dd), 4.64 to 3.60 (8H, m), 1.93 to 1.36 (12H, m).  $^{13}\text{C}$  NMR (101 MHz,  $\text{CDCl}_3$ )  $\delta$  193.77, 170.00, 167.60, 165.07, 164.74, 152.88, 135.73, 134.77, 132.95, 131.34, 129.16, 128.80, 128.75, 128.71, 128.55, 128.49, 128.41, 128.02, 127.81, 127.29, 126.78, 126.70, 125.10, 124.86, 108.25, 81.25, 77.55, 77.23, 77.11, 76.91, 76.29, 71.47, 68.71, 68.11, 68.05, 67.80, 65.14, 59.05, 58.40, 57.24, 56.87, 54.08, 52.69, 52.65, 52.03, 49.94, 44.95, 35.04, 33.41, 33.28, 32.73, 32.63, 32.57, 31.89, 28.06, 27.71, 27.46, 27.29, 27.27, 26.13, 25.48, 25.34, 25.11, 25.02, 24.07. **HRMS- $\text{EI}^+$**  ( $m/z$ ): calc'd for  $\text{C}_{21}\text{H}_{27}\text{NO}_4$  357.1940; found 357.1944.

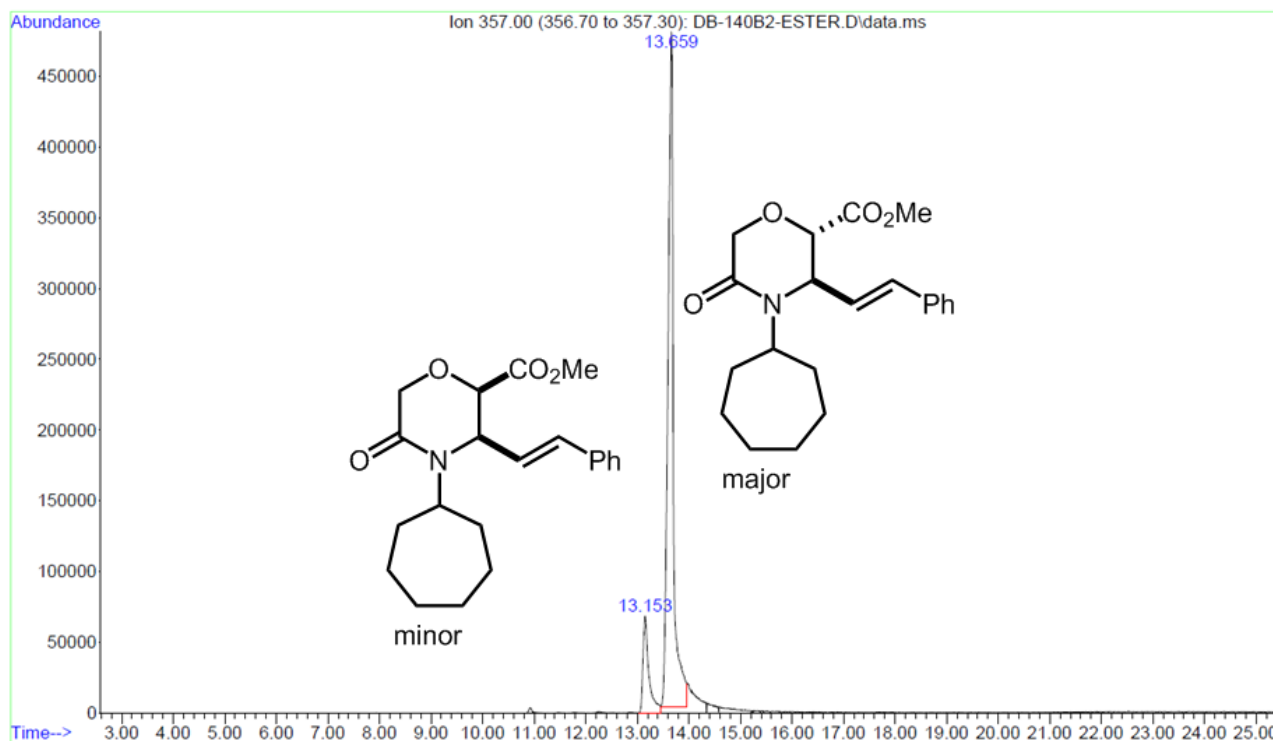

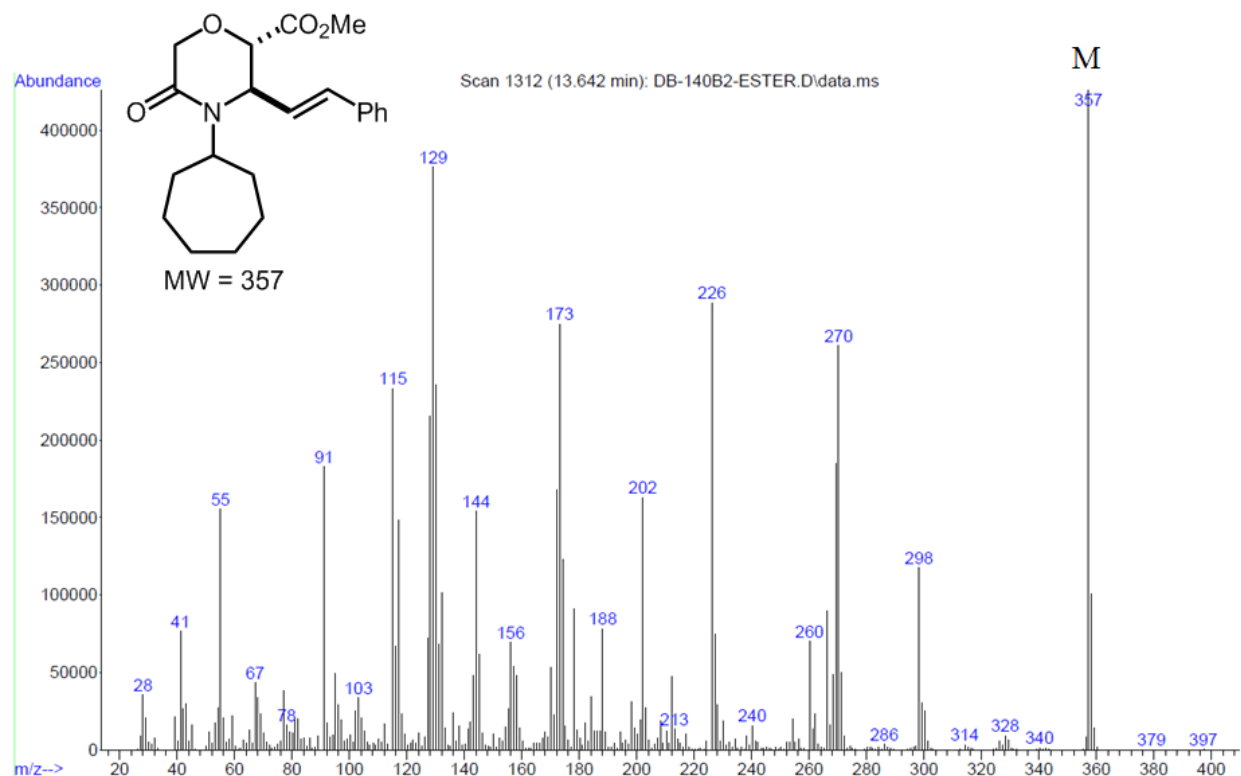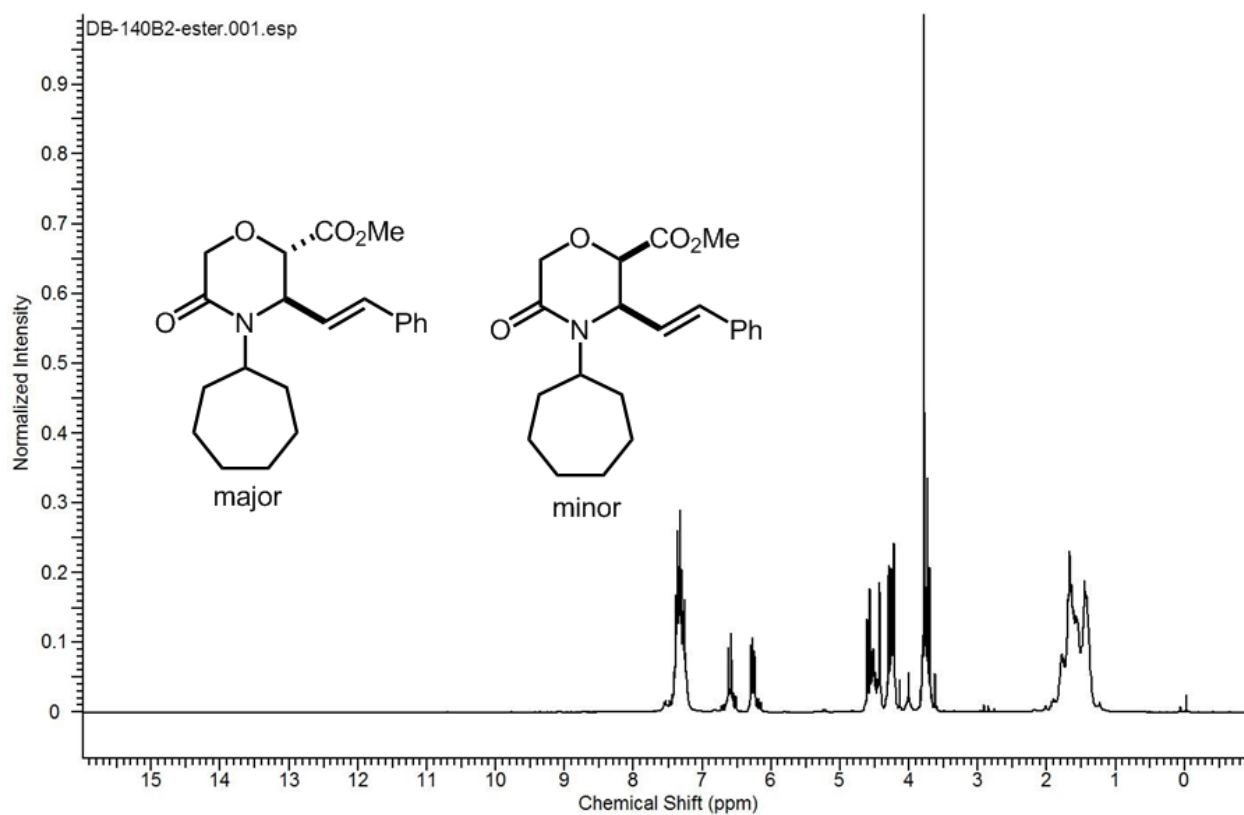



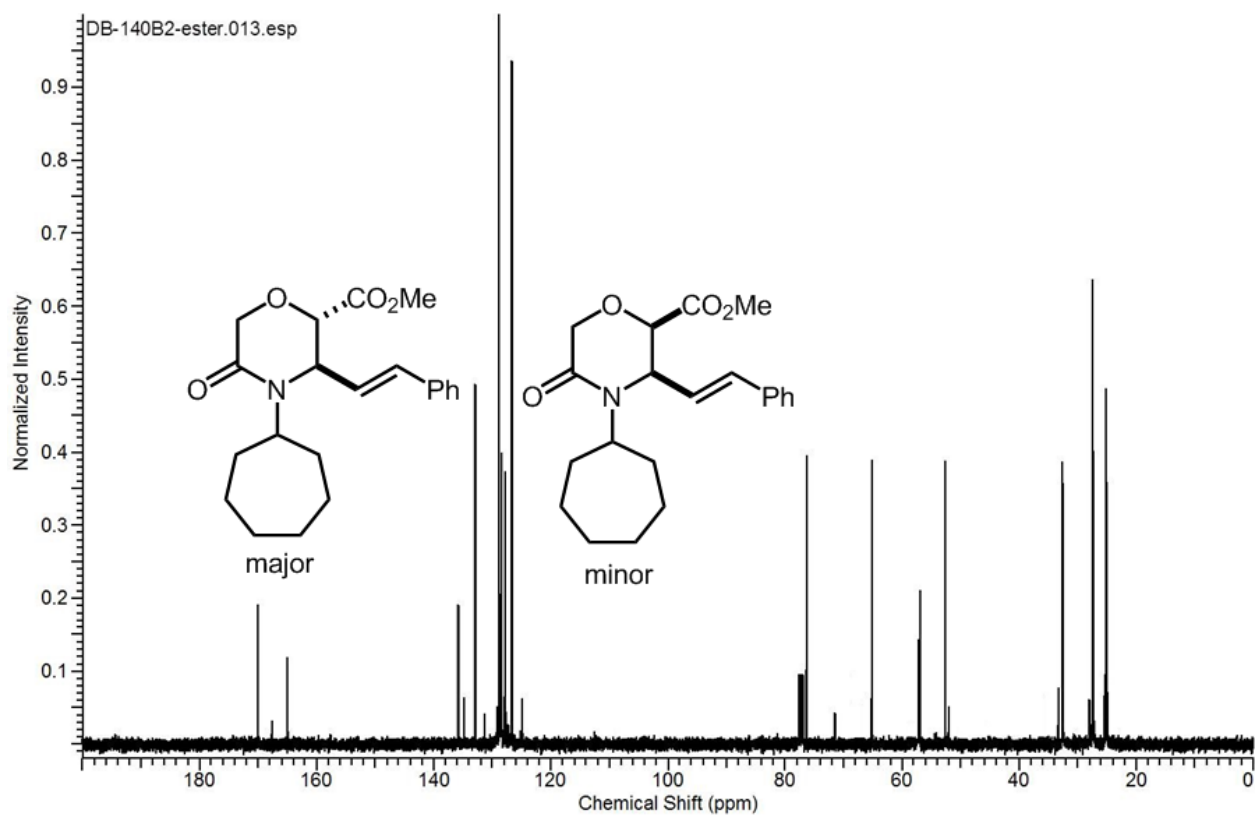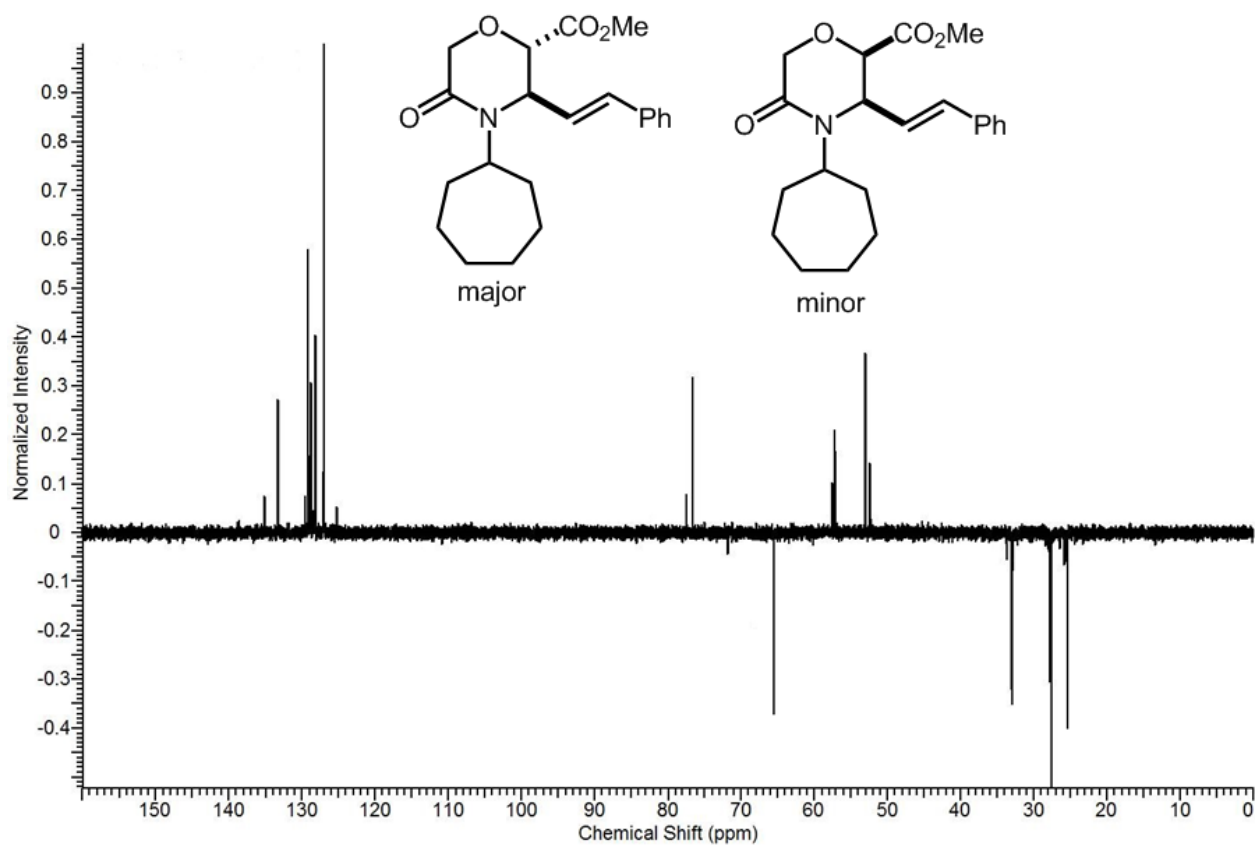

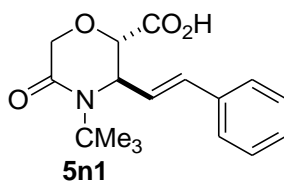

Prepared from imine **4n** (187 mg, 1.0 mmol) and diglycolic anhydride (128 mg, 1.1 equiv) using General Procedure B. T = 90 °C, time = 12 h. An analytical sample was obtained after a series of washes with cold petroleum ether.  $^1\text{H}$  NMR (400 MHz,  $\text{CDCl}_3$ )  $\delta$  7.43 to 7.22 (5H, m), 6.63 (1H, d), 6.30 (1H, dd), 4.95 (1H, d), 4.71 to 4.53 (2H, dd), 4.21 (1H, d), 1.40 (9H, s).  $^{13}\text{C}$  NMR (101 MHz,  $\text{CDCl}_3$ )  $\delta$  173.1, 167.8, 135.6, 133.0, 128.8, 128.8, 128.5, 127.4, 126.8, 126.7, 76.3, 65.6, 61.2, 59.1, 28.4. **HRMS- $\text{EI}^+$**  ( $m/z$ ): calc'd for  $\text{C}_{17}\text{H}_{21}\text{NO}_4$  303.1471; found 303.1467.

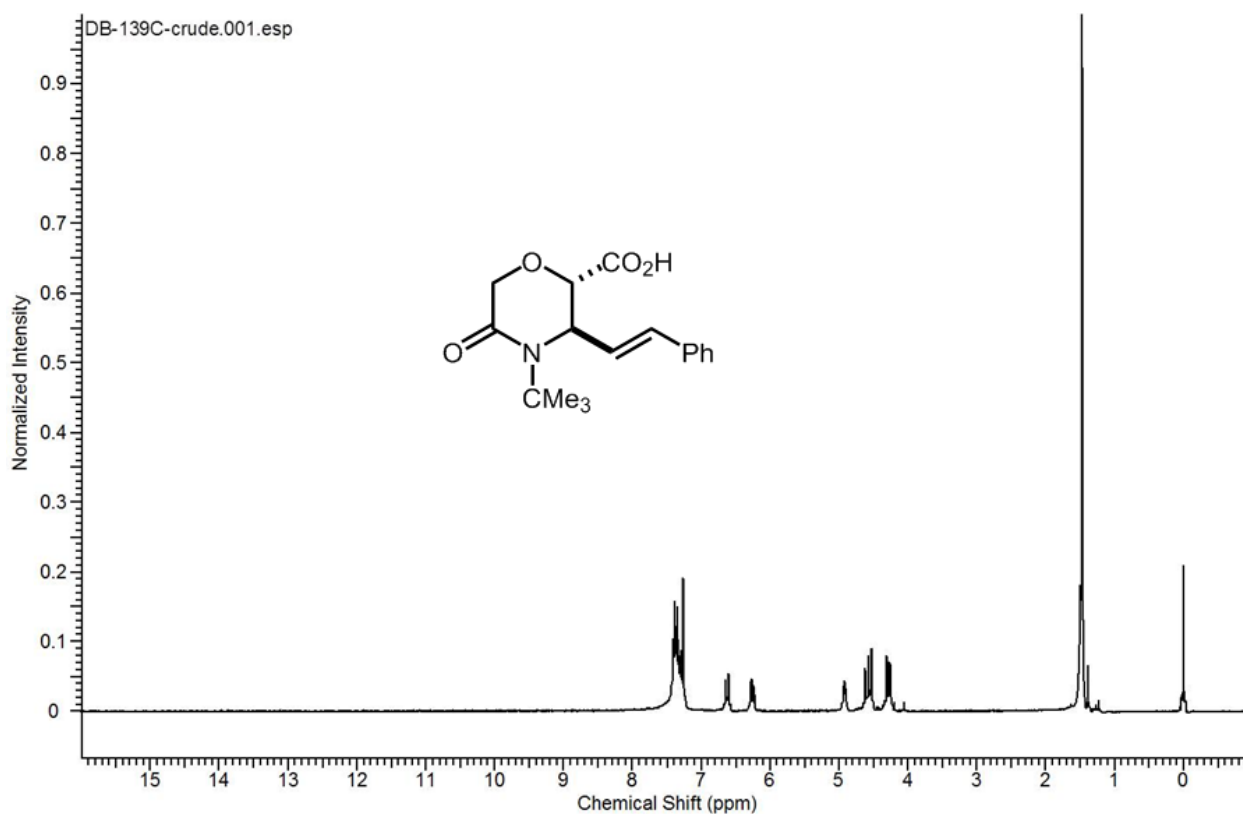

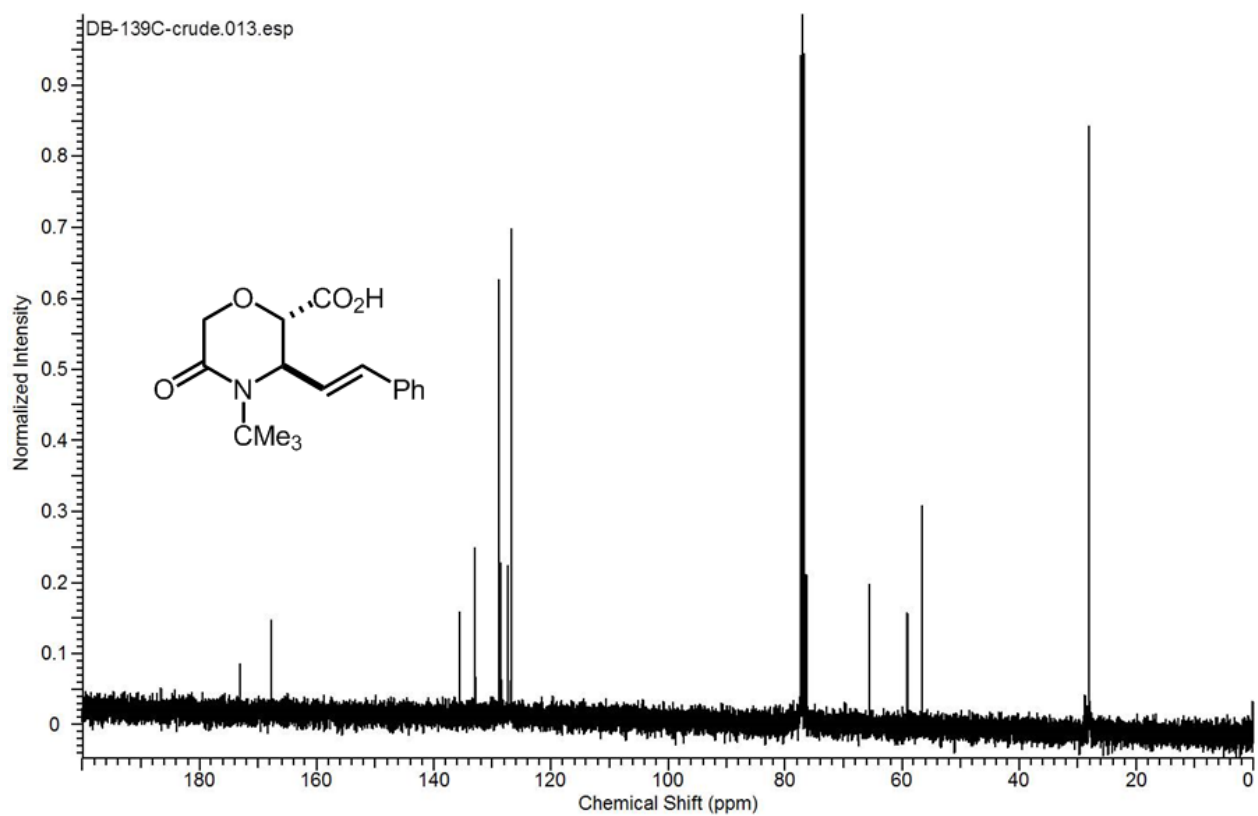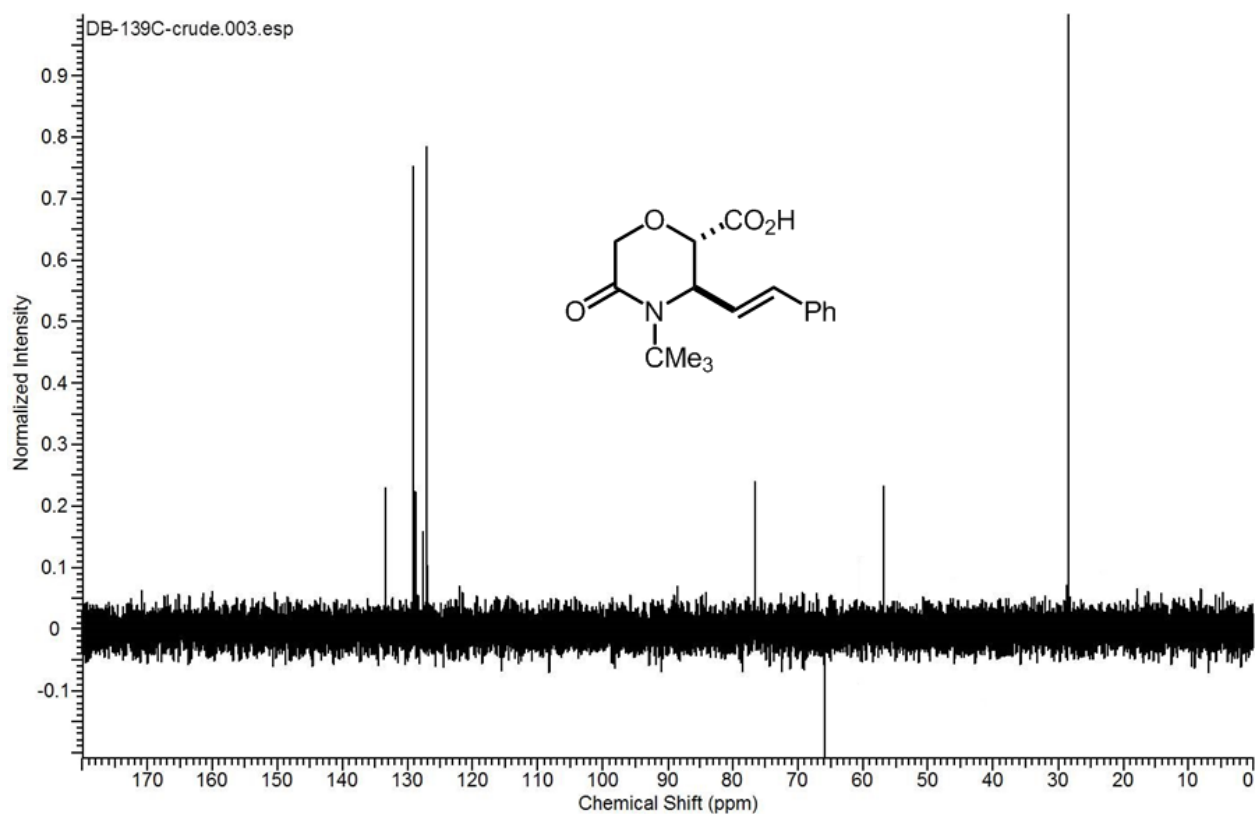

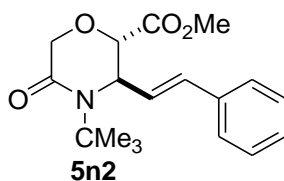

Prepared from crude **5n1** using General Procedure C. Purification: Flash chromatography on silica eluting with hexane/EtOAc (50:50 to 0:100) then 100% MeOH. Yield = 260 mg, 82% over 2 steps, 96:4 dr.  $^1\text{H}$  NMR (400 MHz,  $\text{CDCl}_3$ )  $\delta$  7.55 to 7.16 (5H, m), 6.66, (1H, d), 6.26 to 6.09 (1H, dd), 4.83 (1H, d), 4.58 to 4.32 (2H, dd), 4.25 (1H, d), 3.74 (3H, s), 1.43 (9H, s).  $^{13}\text{C}$  NMR (101 MHz,  $\text{CDCl}_3$ )  $\delta$  170.4, 167.8, 135.7, 135.7, 134.5, 134.0, 132.7, 131.3, 129.1, 128.9, 128.8, 128.7, 128.7, 128.6, 128.6, 128.5, 128.4, 128.3, 128.2, 127.7, 127.2, 127.1, 126.7, 126.6, 125.7, 80.2, 78.4, 77.6, 77.6, 77.3, 77.0, 76.6, 71.8, 71.7, 70.4, 68.6, 68.1, 68.0, 65.7, 59.2, 58.4, 57.3, 56.6, 52.6, 52.0, 51.8, 51.0, 45.8, 45.3, 36.5, 29.9, 28.8, 28.4, 28.1, 27.9. **HRMS- $\text{EI}^+$**  ( $m/z$ ): calc'd for  $\text{C}_{18}\text{H}_{23}\text{NO}_4$  317.1627; found 317.1629.

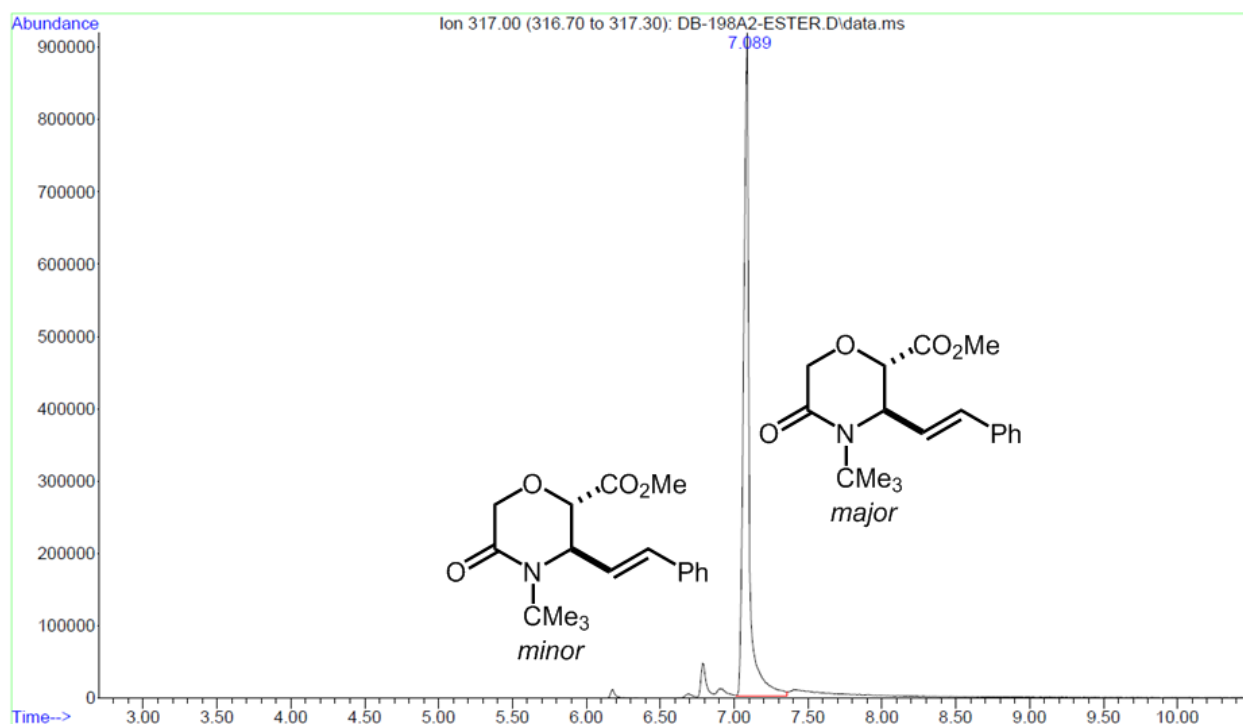

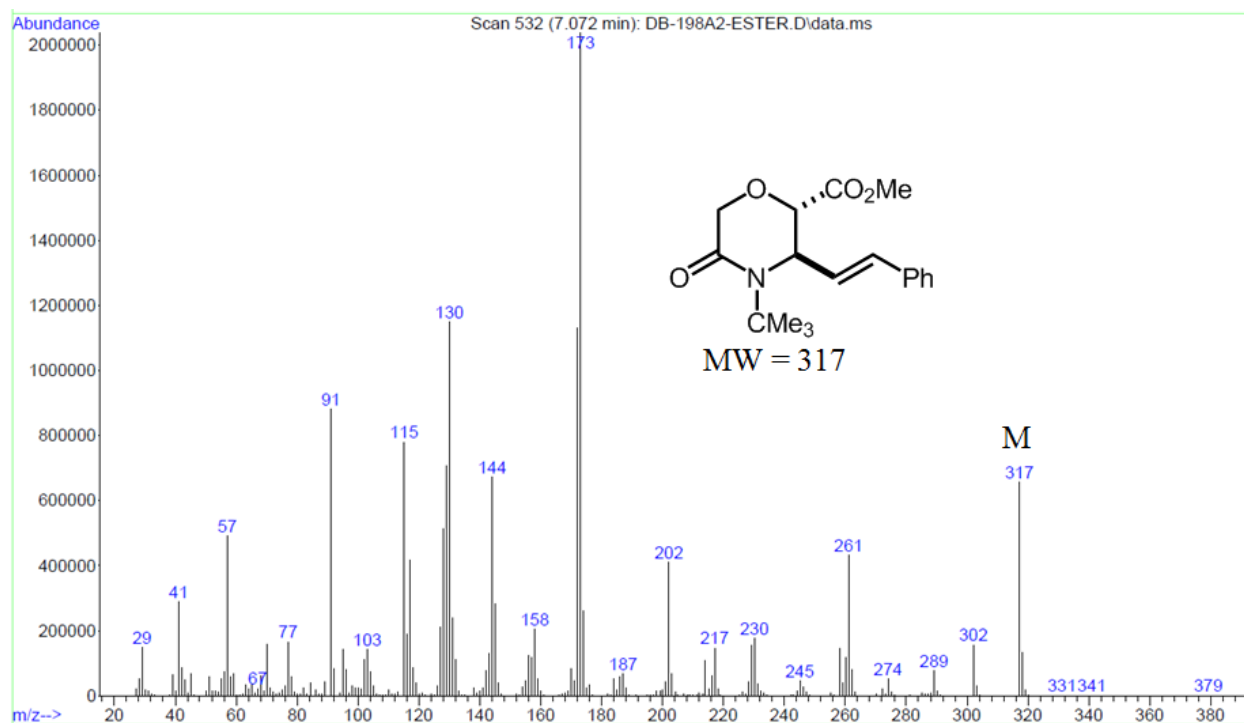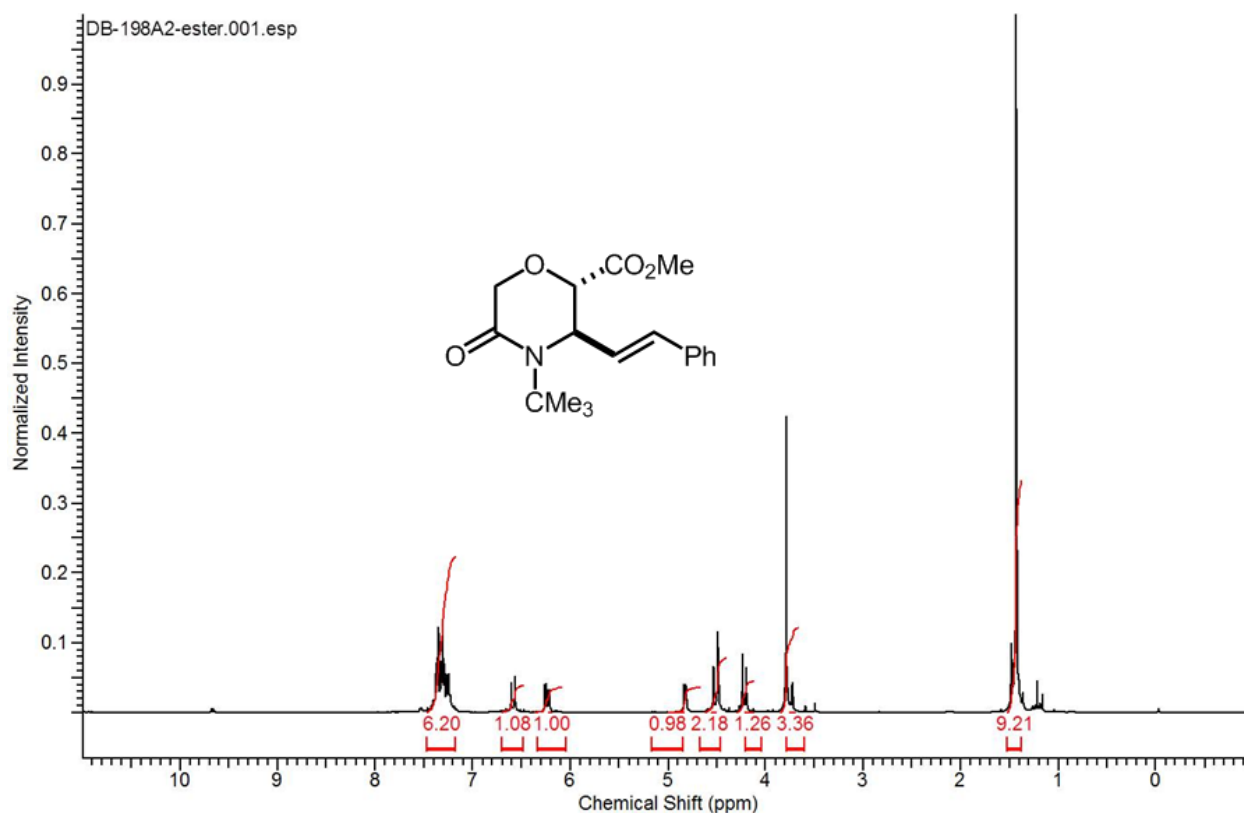

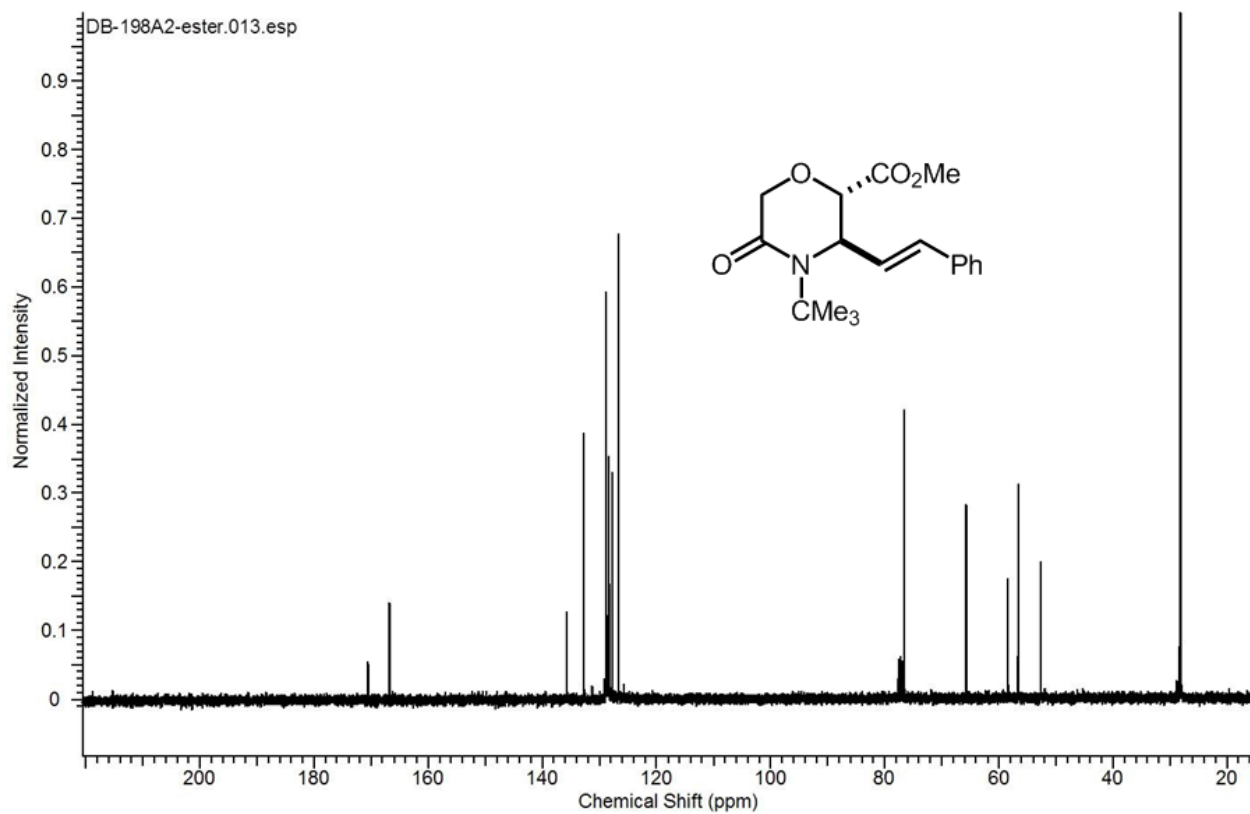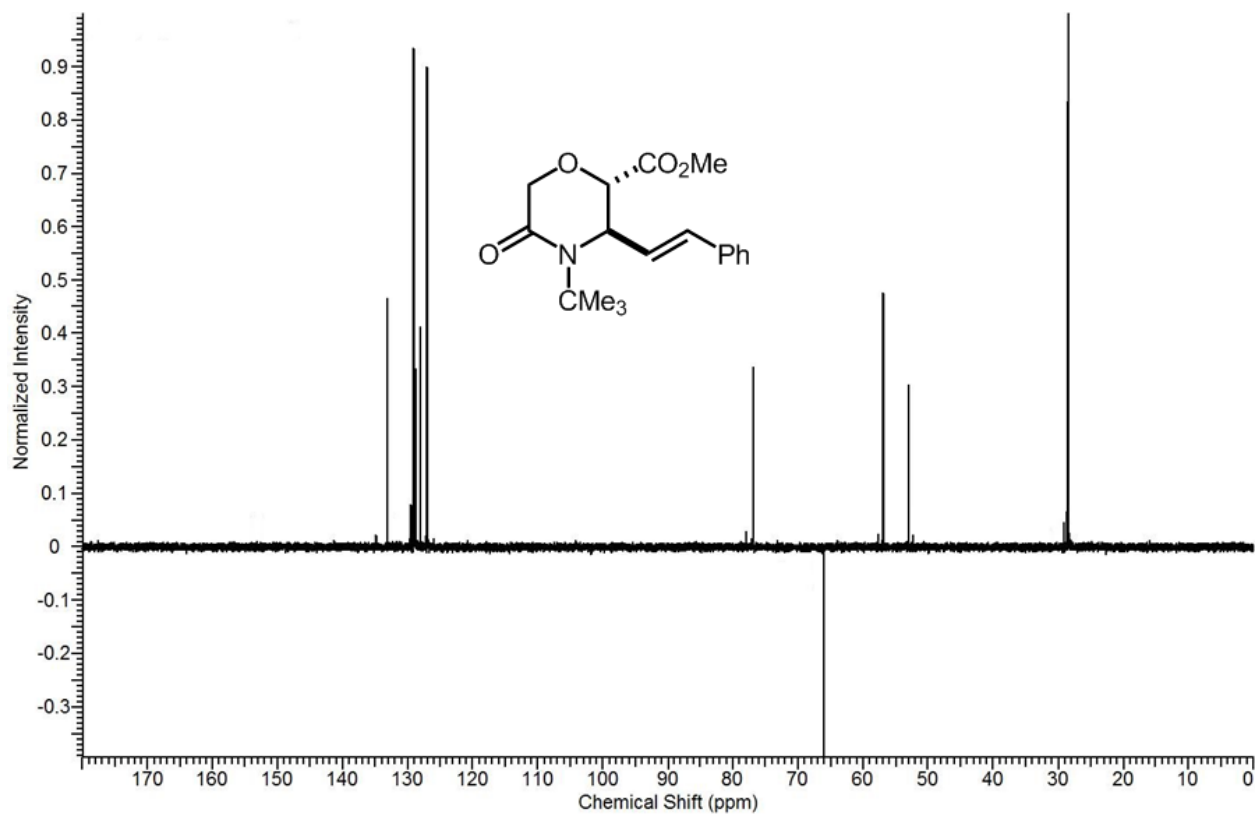

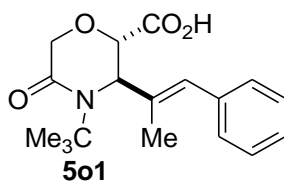

Prepared from imine **4o** (201 mg, 1.0 mmol) and diglycolic anhydride (128 mg, 1.1 equiv) using General Procedure B. T = 90 °C, time = 18 h. An analytical sample was obtained after a series of washes with cold petroleum ether.  $^1\text{H}$  NMR (400 MHz, DMSO)  $\delta$  13.45 (1H, s, br), 7.37 to 7.22 (5H, m), 6.37 (1H, s), 4.67 to 4.54 (2H, dd), 4.28 to 4.09 (2H, dd), 1.91 (3H, s), 1.37 (9H, s).  $^{13}\text{C}$  NMR (101 MHz, DMSO)  $\delta$  172.2, 166.8, 137.2, 136.9, 129.2, 128.8, 127.3, 127.0, 74.0, 65.4, 61.4, 58.2, 40.6, 40.4, 40.2, 40.0, 39.8, 39.6, 39.4, 27.9, 16.2. **HRMS- $\text{EI}^+$**  ( $m/z$ ): calc'd for  $\text{C}_{18}\text{H}_{23}\text{NO}_4$  317.1627; found 317.1627.

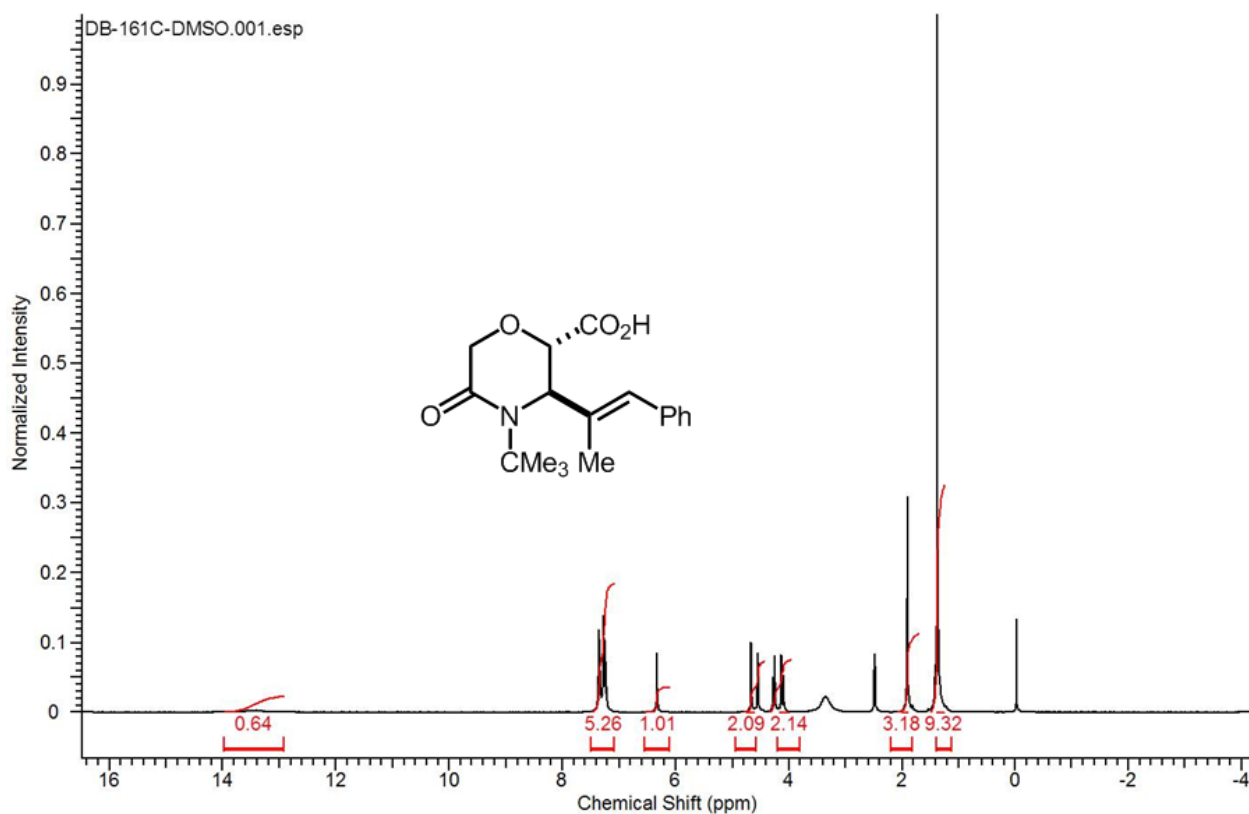

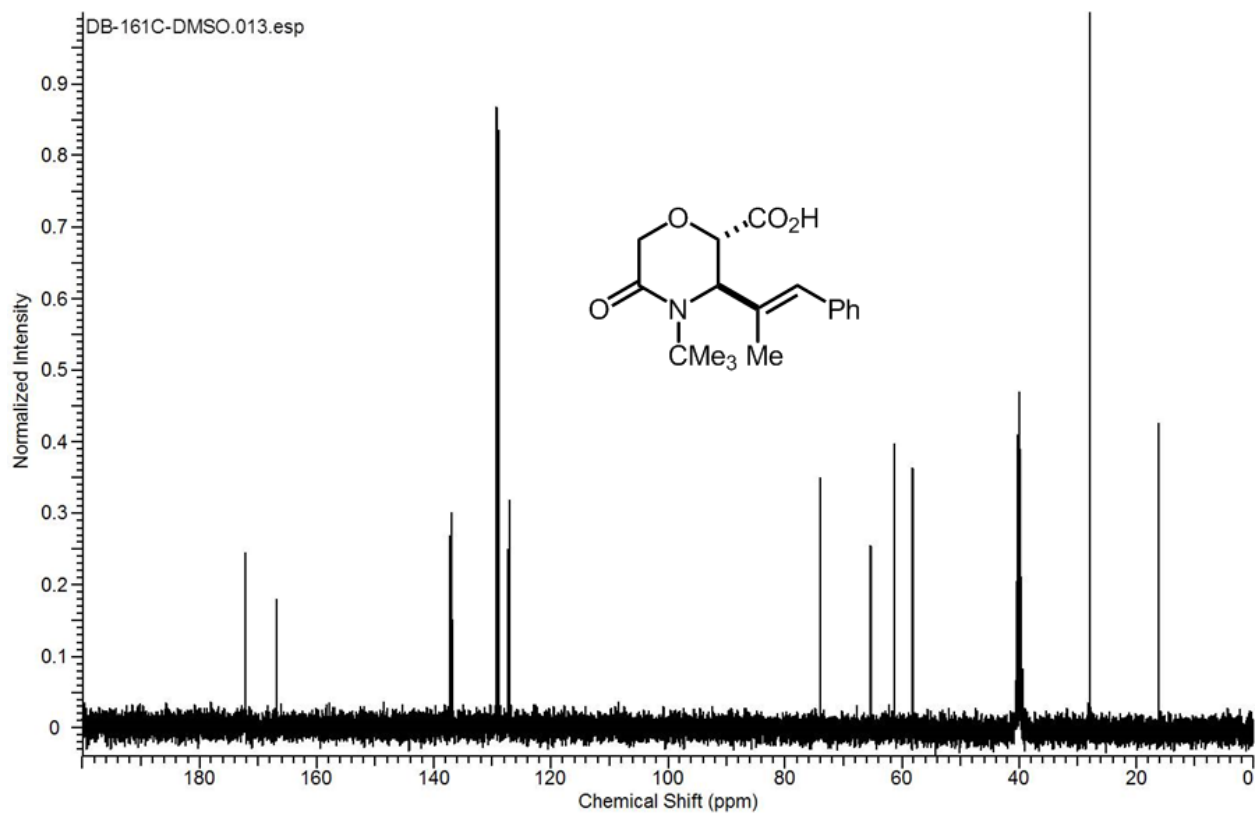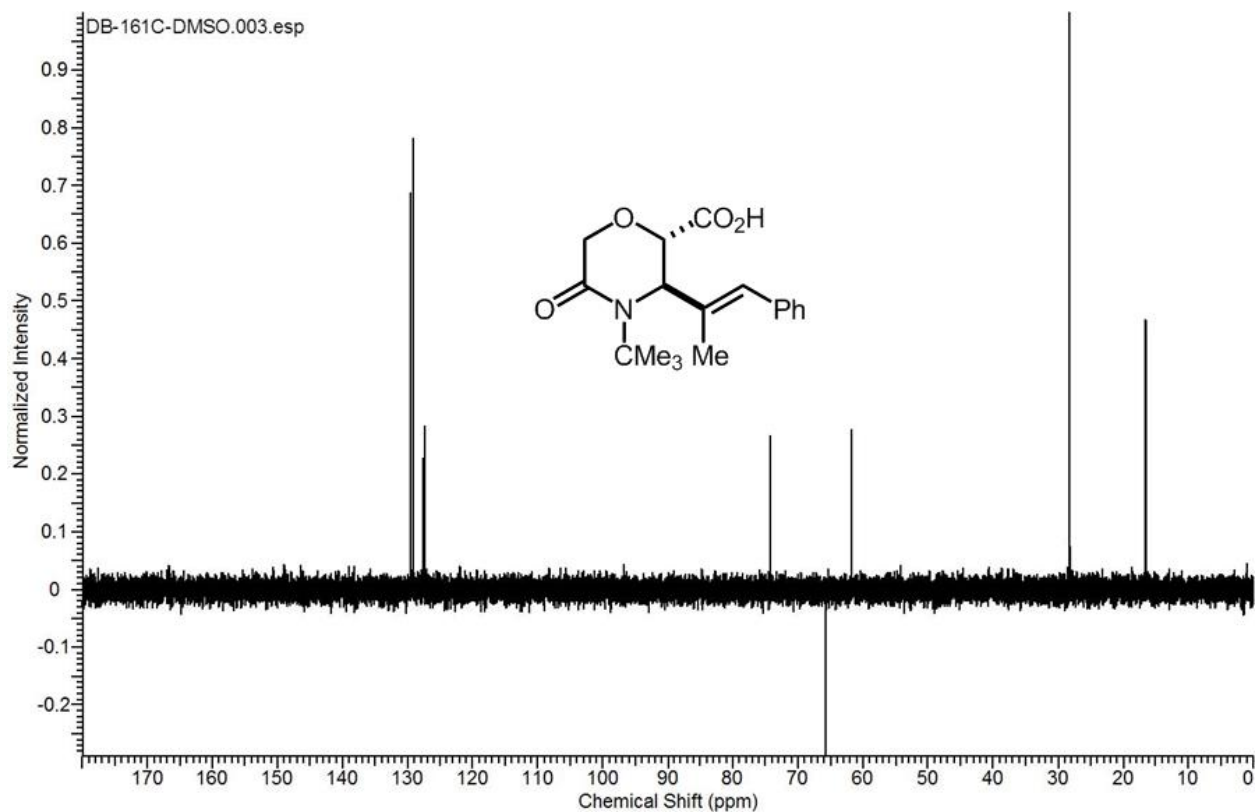



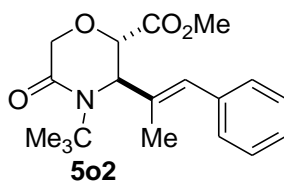

Prepared from crude **5o1** using General Procedure C. Purification: Flash chromatography on silica eluting with hexane/EtOAc (50:50 to 0:100) then 100% MeOH. Yield = 252 mg, 76% over 2 steps, >99:1 dr.  $^1\text{H}$  NMR (400 MHz,  $\text{CDCl}_3$ )  $\delta$  7.36 to 7.20 (5H, m), 6.48 (1H, s), 4.62 to 4.53 (3H, m), 4.23 (1H, d), 3.73 (3H, s), 1.97 (3H, s), 1.46 (9H, s).  $^{13}\text{C}$  NMR (101 MHz,  $\text{CDCl}_3$ )  $\delta$  170.9, 167.0, 136.8, 135.3, 129.0, 128.3, 127.1, 77.5, 77.1, 76.8, 74.8, 65.8, 61.6, 60.4, 58.8, 52.8, 28.2, 28.0, 16.0, 14.3. 28.2. **HRMS- $\text{EI}^+$**  ( $m/z$ ): calc'd for  $\text{C}_{19}\text{H}_{25}\text{NO}_4$  331.1784; found 331.1788.

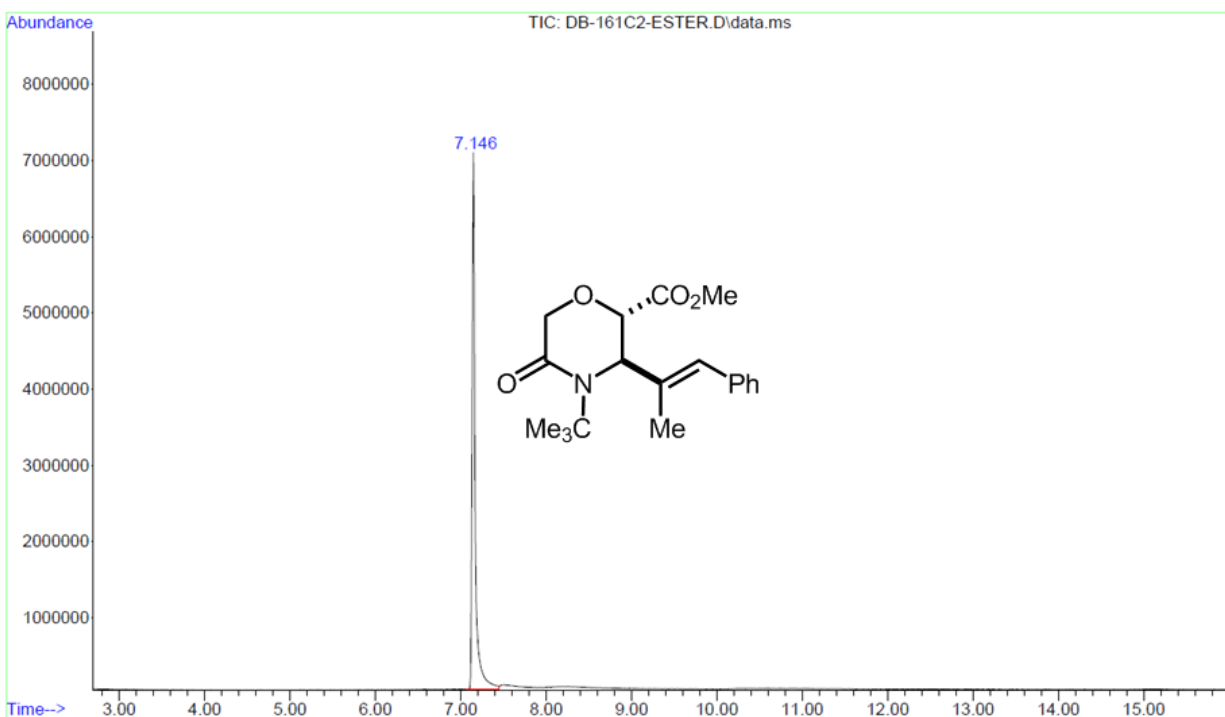

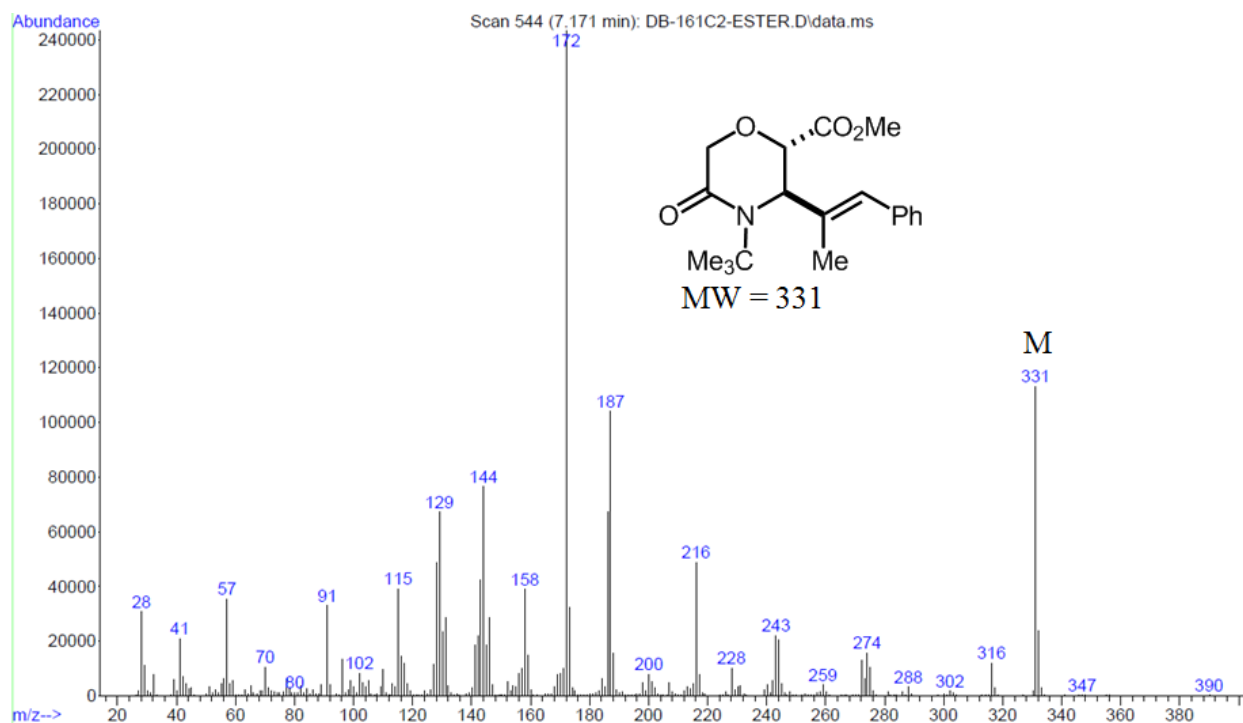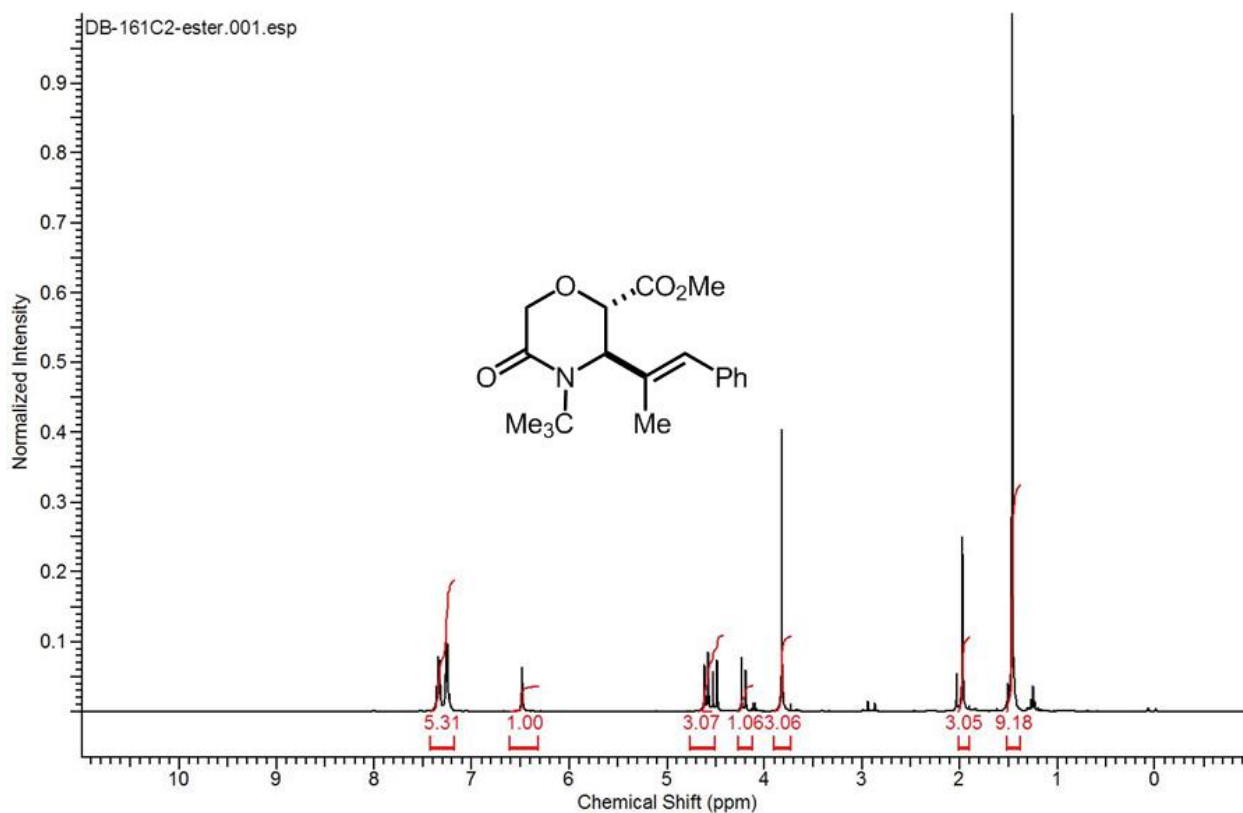

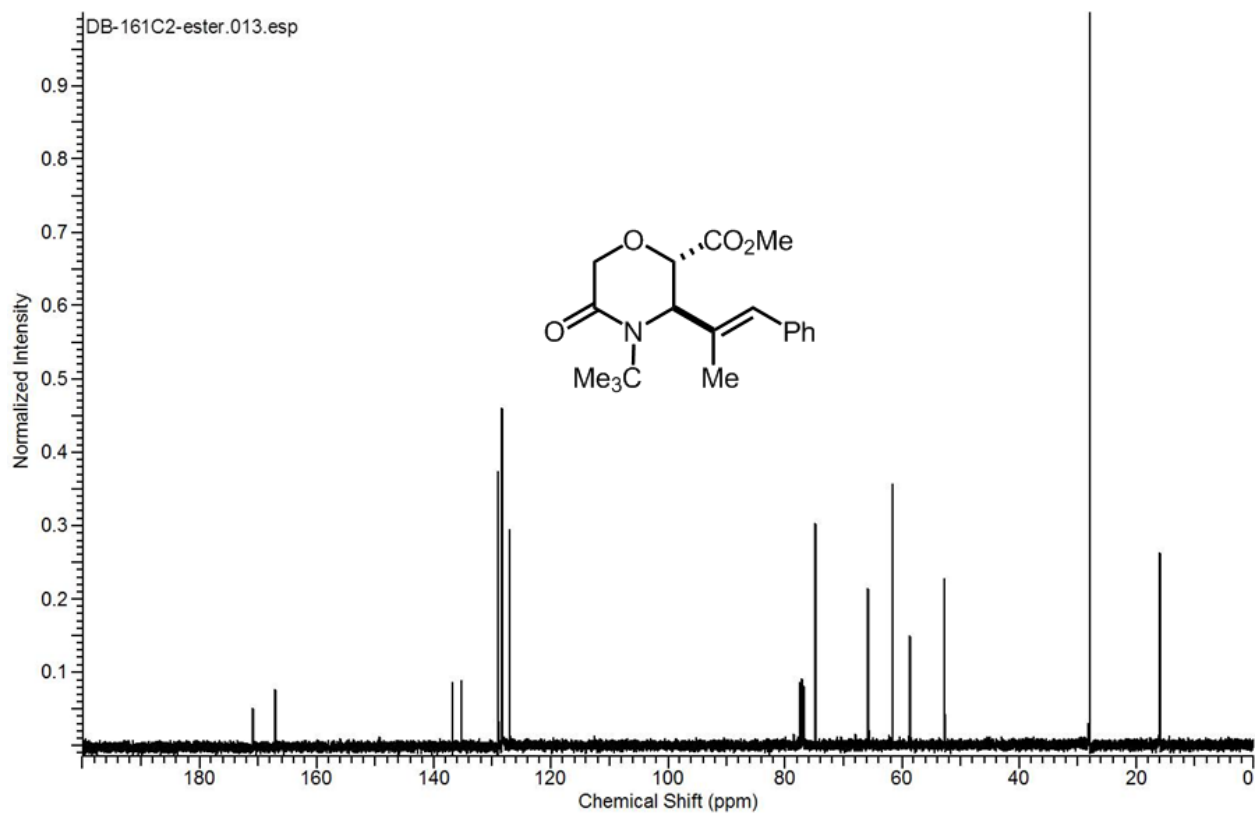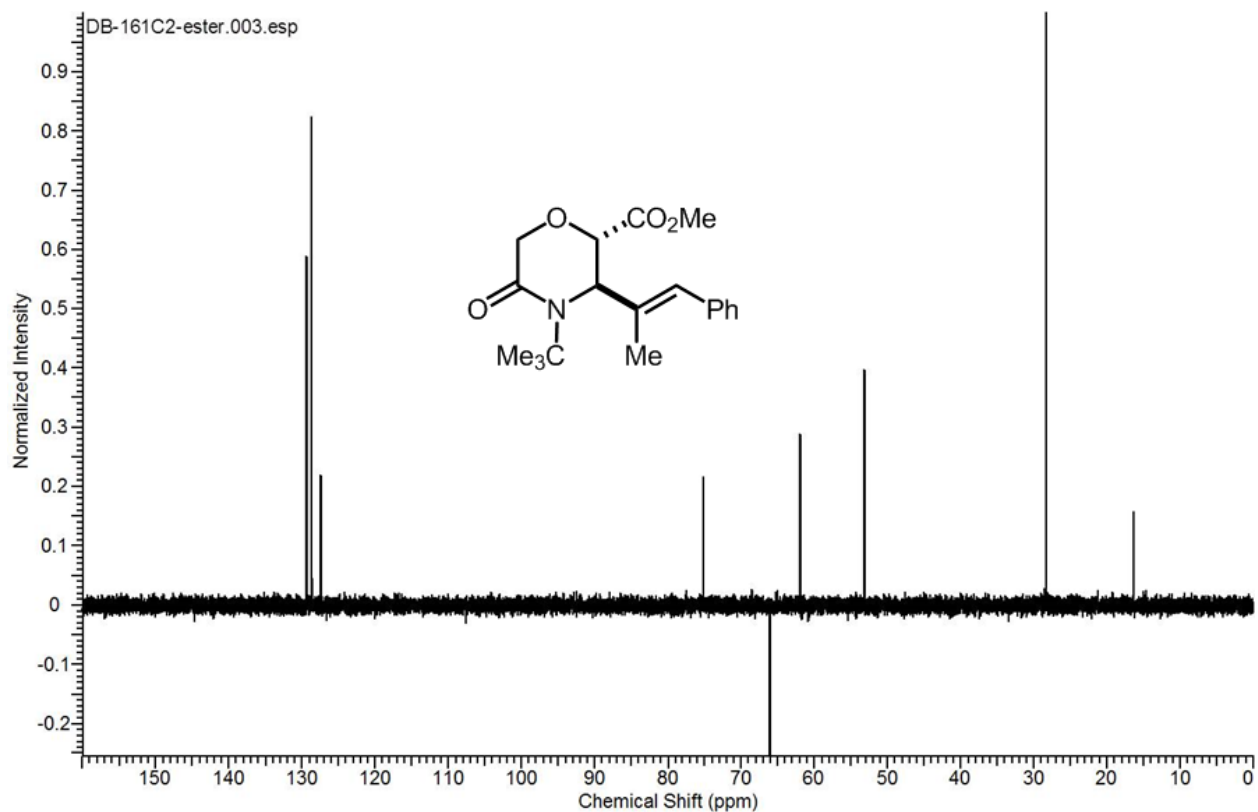

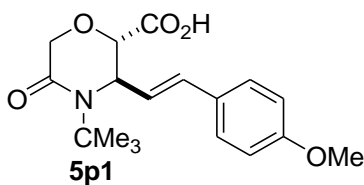

Prepared from imine **4r** (217 mg, 1.0 mmol) and diglycolic anhydride (128 mg, 1.1 equiv) using General Procedure B. T = 90 °C, time = 18 h. An analytical sample was obtained after a series of washes with cold petroleum ether. <sup>1</sup>H NMR (400 MHz, DMSO) δ 13.38 (1H, s, br), 7.41 (2H, d), 6.90 (2H, d), 6.50 (1H, d), 6.30 (1H, dd), 4.74 (1H, d), 4.55 (1H, d), 4.29 to 4.09 (2H, dd), 3.80 (3H, s), 1.36 (9H, s). <sup>13</sup>C NMR (101 MHz, DMSO) δ 172.0, 166.7, 159.6, 133.0, 131.2, 129.1, 128.3, 127.2, 114.6, 76.2, 68.8, 65.4, 58.5, 57.7, 56.7, 55.7, 40.7, 40.4, 40.2, 40.0, 39.8, 39.6, 39.4, 30.0, 29.0, 28.4, 28.2. **HRMS-EI<sup>+</sup>** (*m/z*): calc'd for C<sub>18</sub>H<sub>23</sub>NO<sub>5</sub> 333.1576; found 333.1580.

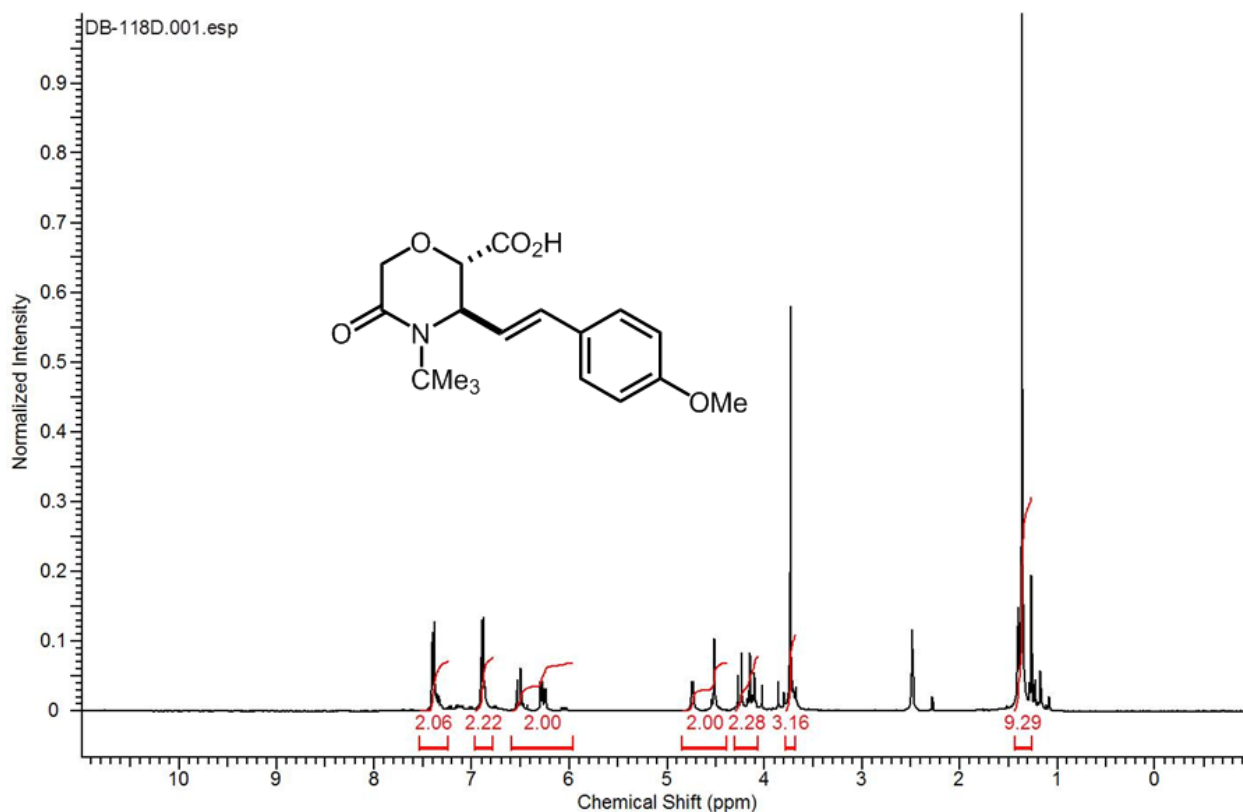

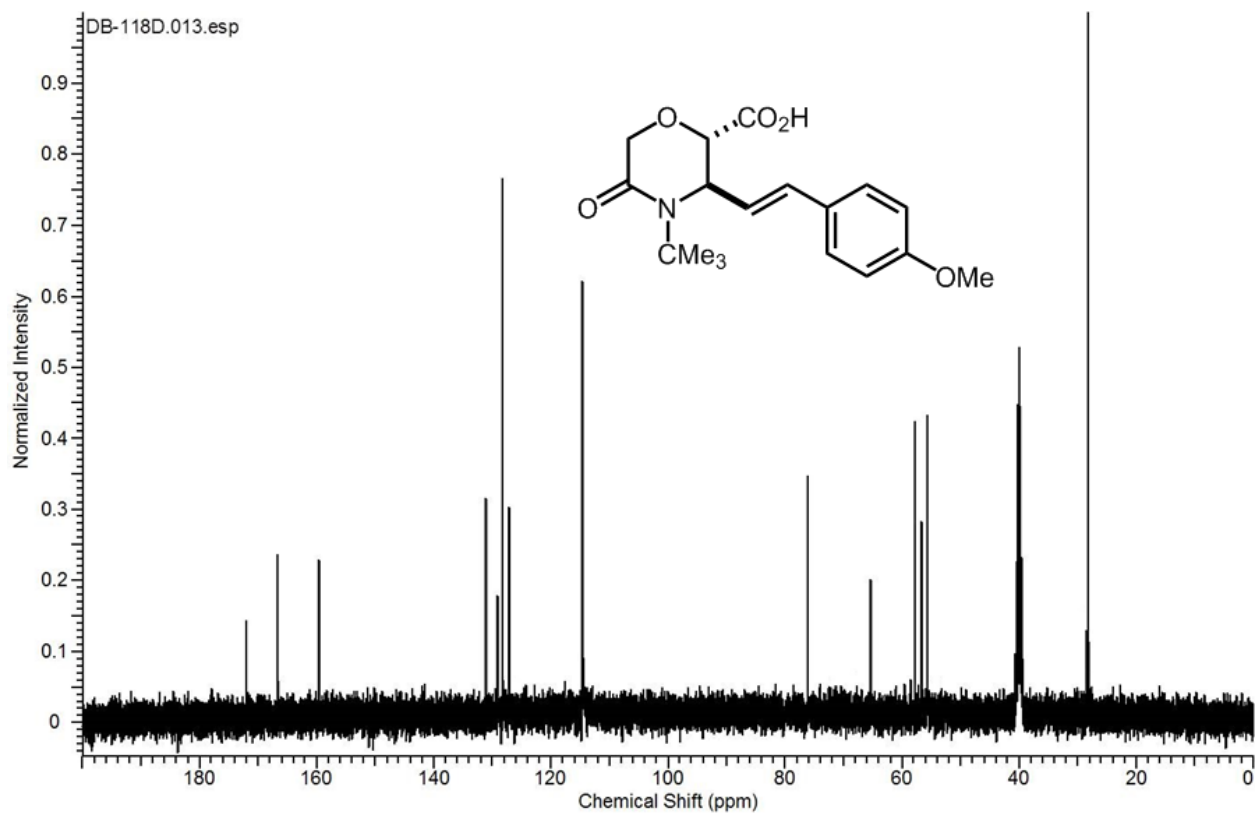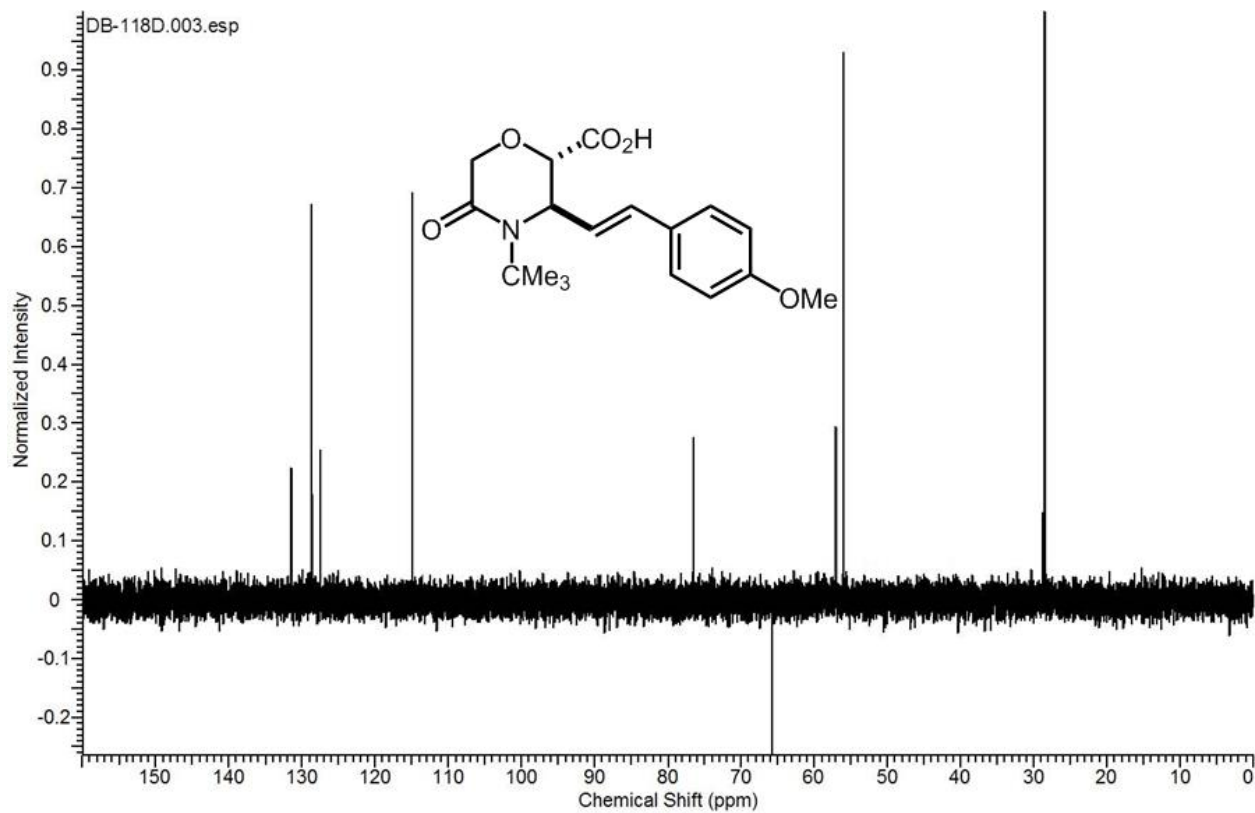

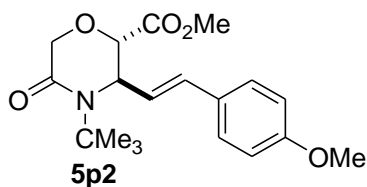

Prepared from crude **5p1** using General Procedure C. Purification: Flash chromatography on silica eluting with hexane/EtOAc (50:50 to 0:100) then 100% MeOH. Yield = 274 mg, 79% over 2 steps, 93:7 dr. <sup>1</sup>H NMR (400 MHz, CDCl<sub>3</sub>) δ 7.48 (2H, d), 6.88 (2H, d), 6.52 (1H, d), 6.09 (1H, dd), 4.78 (1H, d), 4.55 to 4.34 (2H, dd), 4.19 to 4.15 (1H, dd), 3.79 to 3.71 (6H, overlapping singlets), 1.33 (9H, s). <sup>13</sup>C NMR (101 MHz, CDCl<sub>3</sub>) δ 170.5, 166.7, 62.5, 159.8, 152.3, 133.9, 132.1, 130.4, 129.9, 128.4, 128.0, 127.9, 125.4, 123.3, 114.6, 114.2, 114.1, 113.5, 78.6, 77.0, 76.7, 71.8, 68.6, 68.1, 68.0, 65.7, 59.2, 58.3, 57.4, 56.6, 55.3, 52.6, 51.8, 28.8, 28.4. **HRMS-ESI<sup>+</sup>** (*m/z*): calc'd for C<sub>19</sub>H<sub>25</sub>NO<sub>5</sub> 347.1733; found 347.1729.

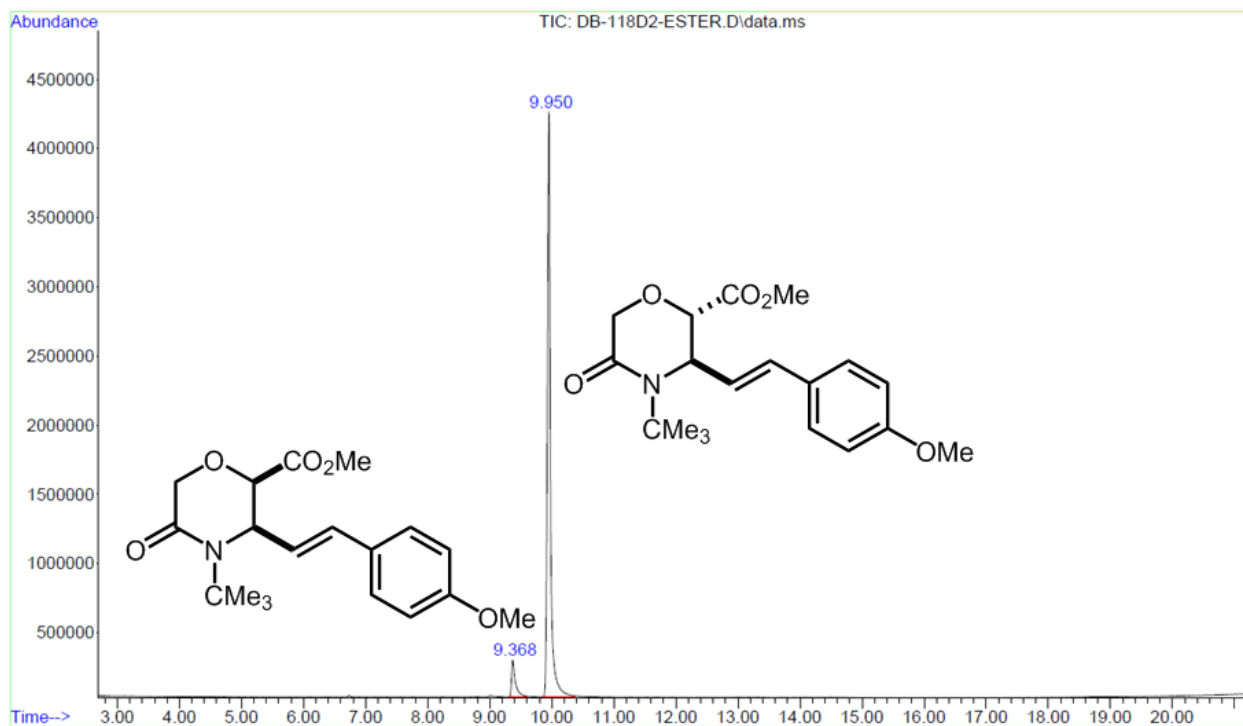

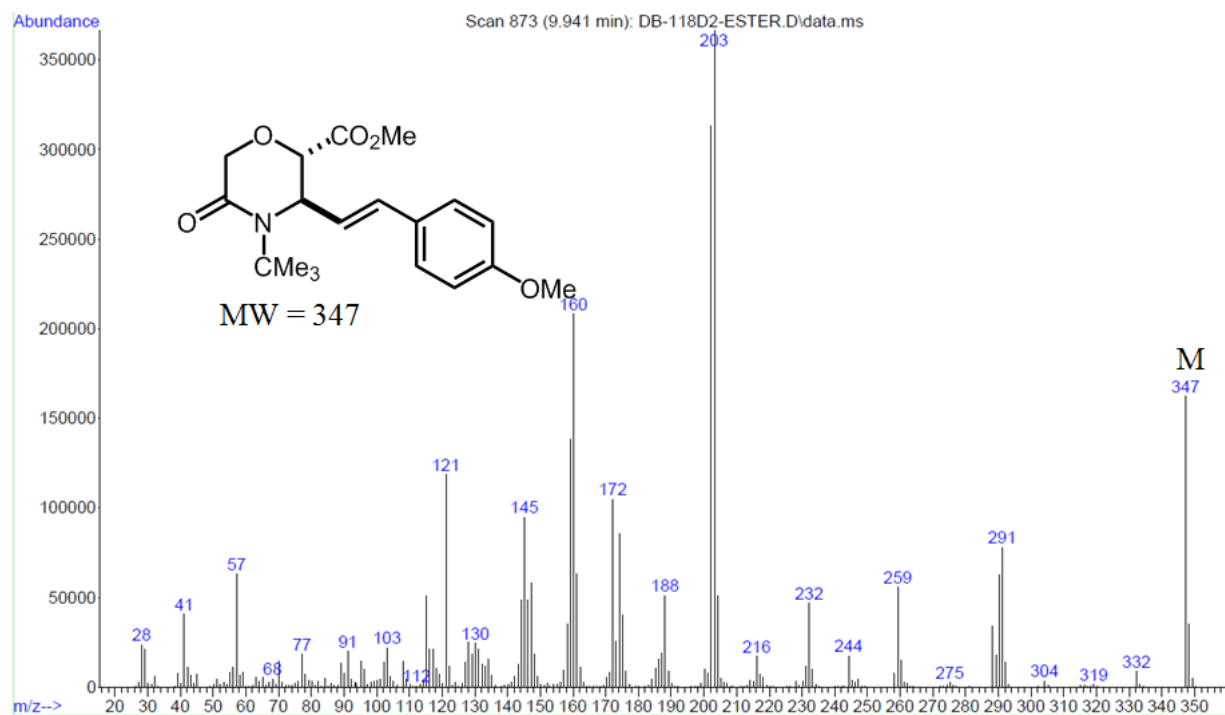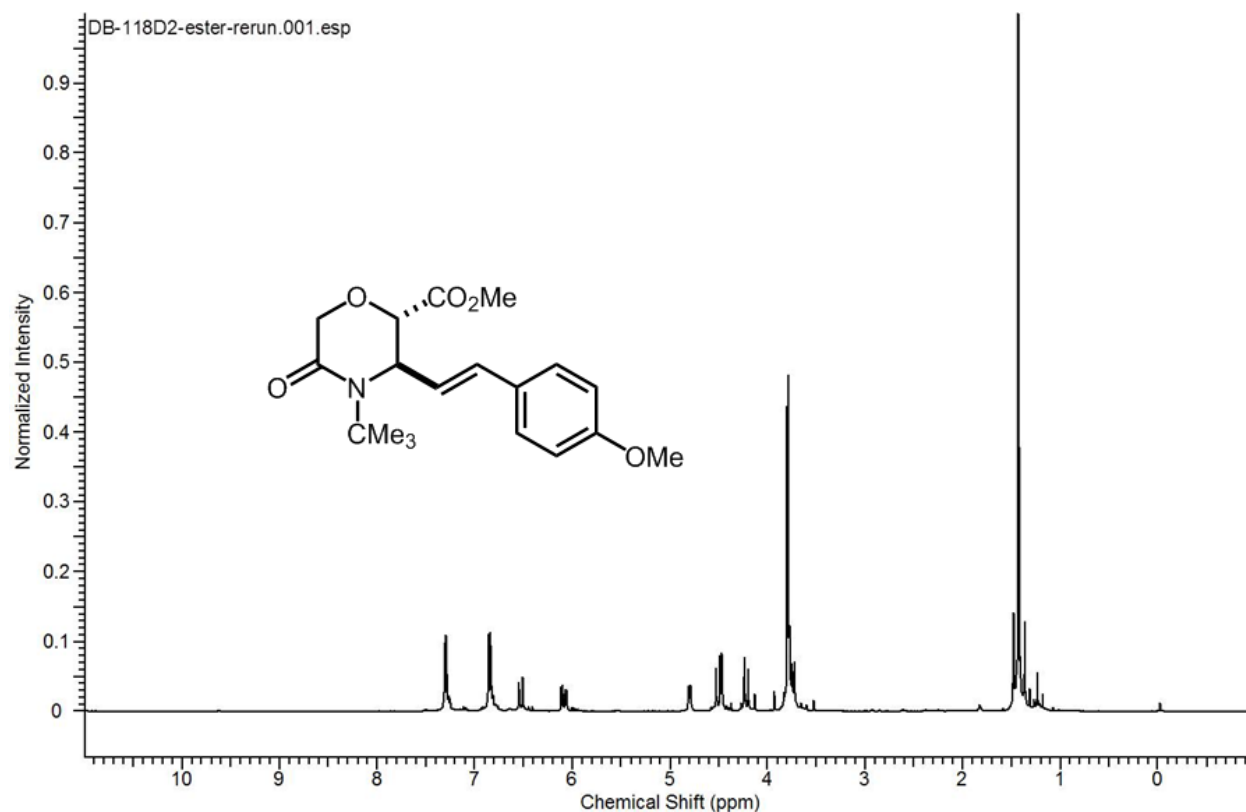

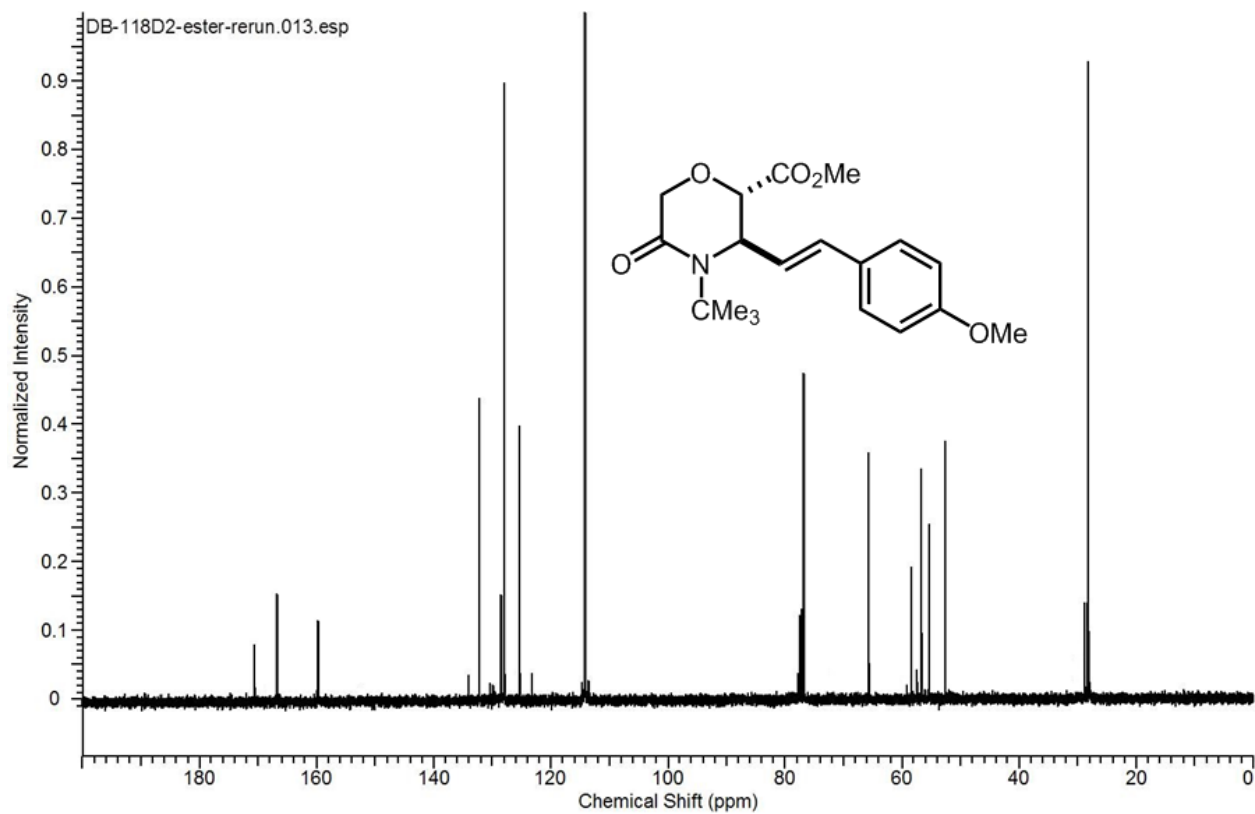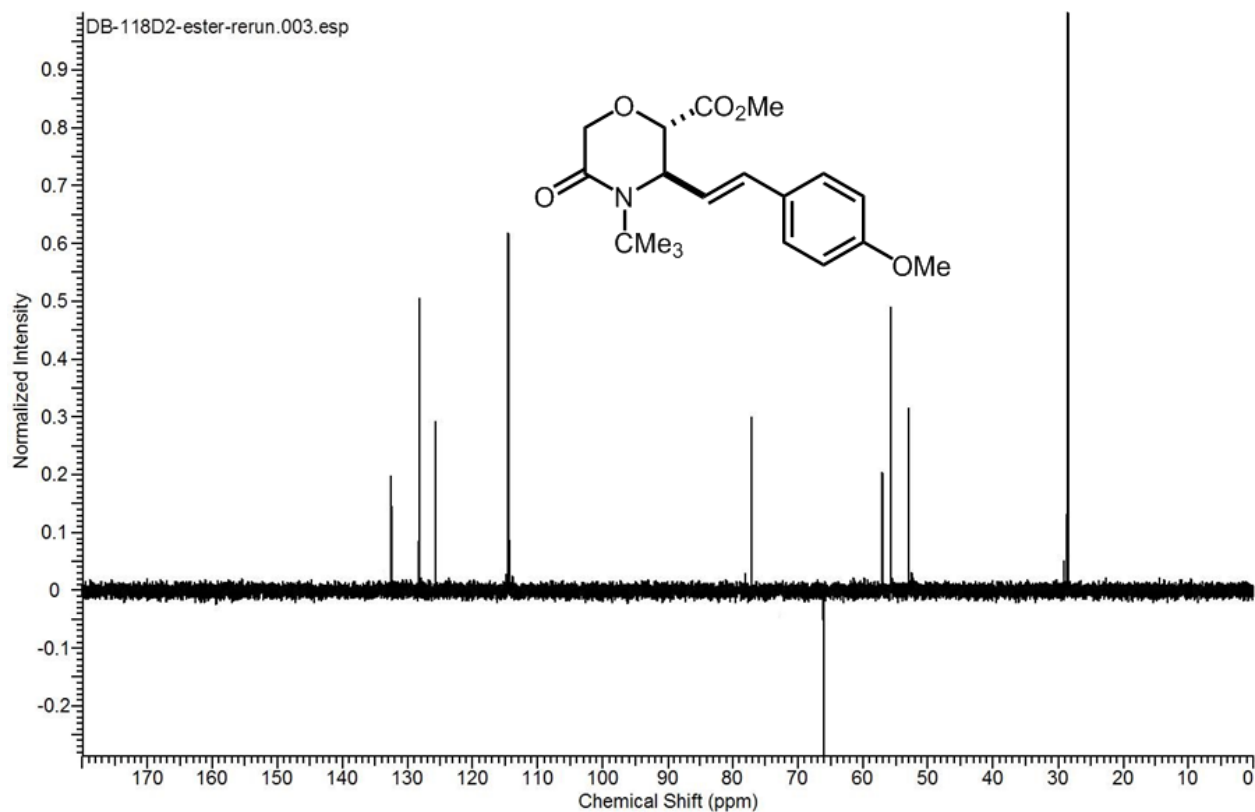



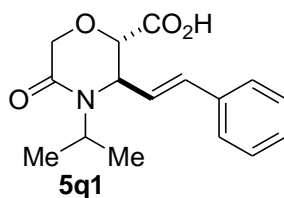

Prepared from imine **4p** (305 mg, 1.0 mmol) and diglycolic anhydride (128 mg, 1.1 equiv) using General Procedure B. T = 90 °C, time = 16 h. Yield = 295 mg, 82%, 83:17 dr.  $^1\text{H}$  NMR (400 MHz,  $\text{CDCl}_3$ )  $\delta$  11.31 (1H, s, br), 7.40 to 7.11 (5H, m), 6.62 (1H, d), 6.27 to 6.20 (1H, dd), 4.67 to 4.46 (3H, m), 4.39 to 4.21 (1H, m), 4.10 (1H, d), 1.27 to 1.18 (6H, dd).  $^{13}\text{C}$  NMR (101 MHz,  $\text{CDCl}_3$ )  $\delta$  173.6, 172.2, 170.7, 167.4, 167.0, 135.6, 135.6, 133.3, 129.2, 128.8, 128.7, 128.5, 128.1, 127.2, 126.9, 126.7, 123.8, 77.6, 77.3, 77.0, 76.4, 75.6, 70.8, 68.8, 68.2, 68.1, 68.1, 67.3, 64.5, 57.0, 55.5, 52.2, 49.0, 47.3, 45.3, 22.4, 20.6, 20.2, 19.6, 19.5. **HRMS- $\text{EI}^+$**  ( $m/z$ ): calc'd for  $\text{C}_{16}\text{H}_{19}\text{NO}_4$  289.1314; found 289.1318.

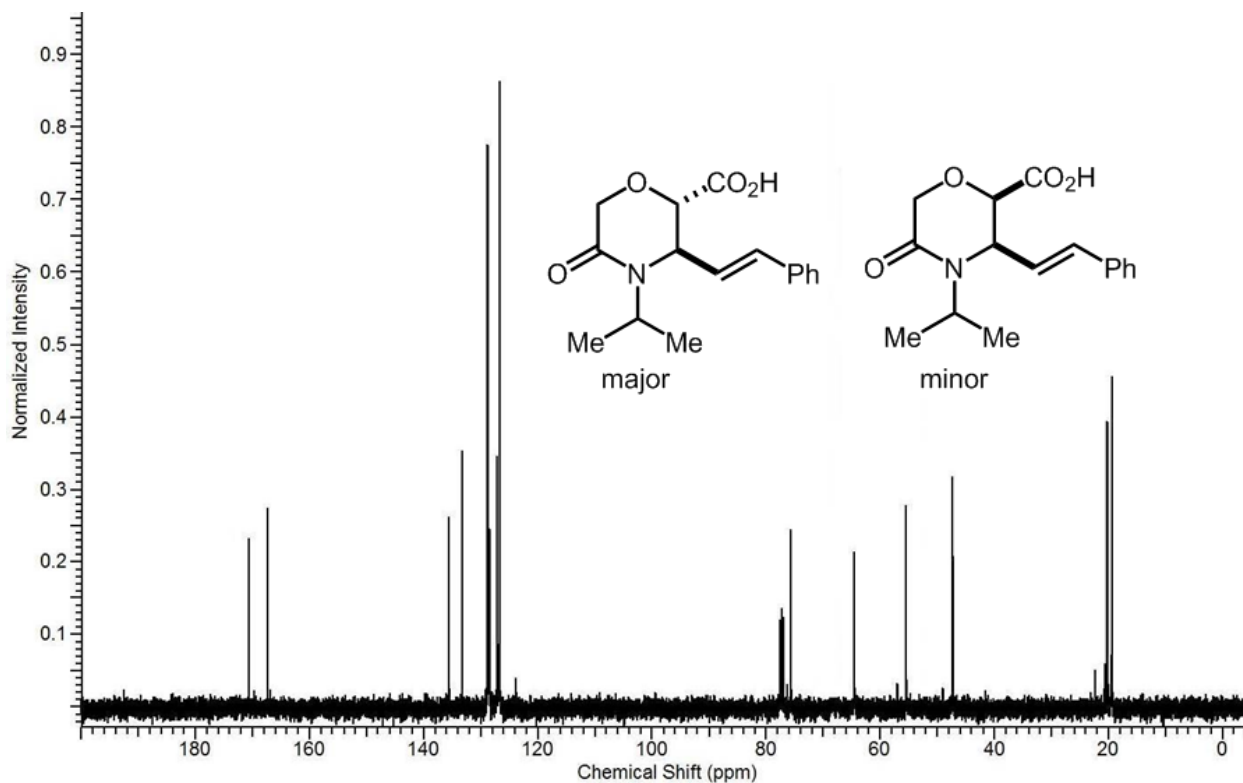

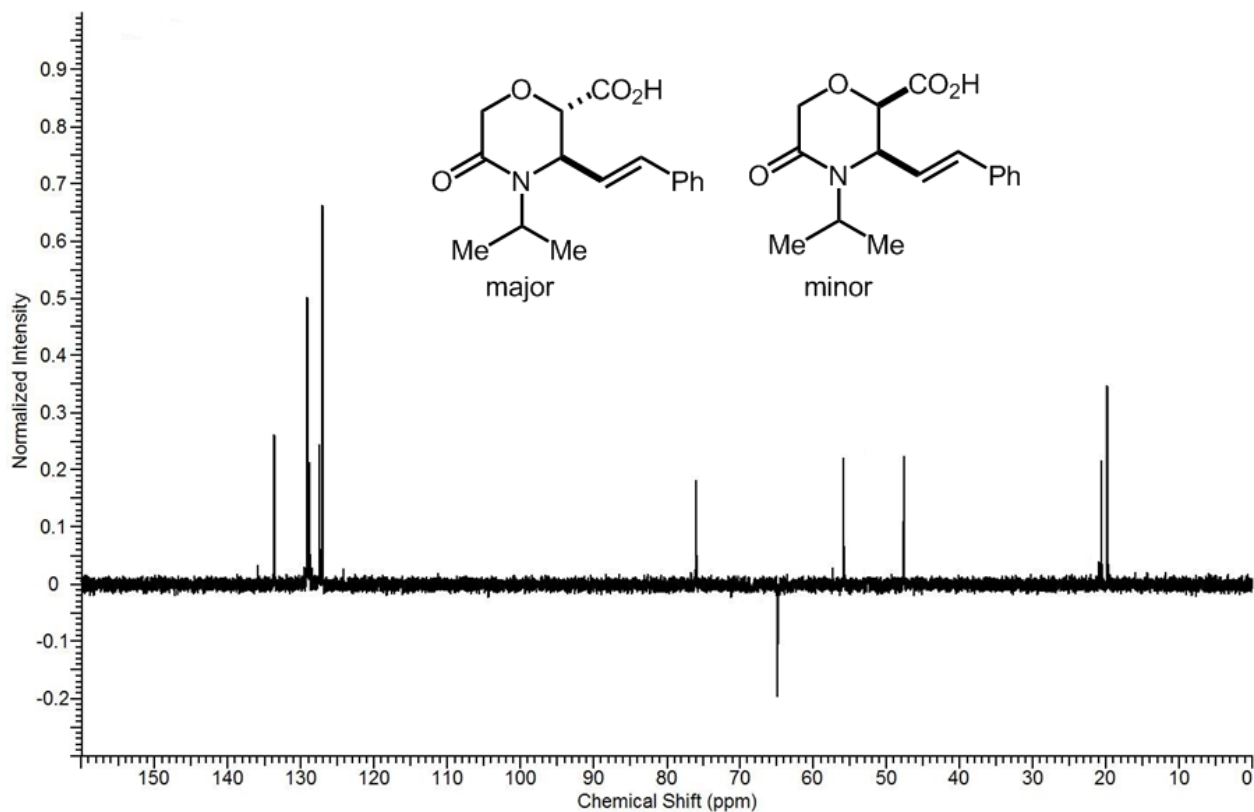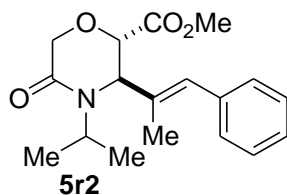

Prepared from imine **4q** (187 mg, 1.0 mmol) and diglycolic anhydride (128 mg, 1.1 equiv) using General Procedures B and C. T = 90 °C, time = 12 h. Yield = 289 mg, 91%, 92:8 dr. <sup>1</sup>H NMR (400 MHz, CDCl<sub>3</sub>) δ 7.36 to 7.20 (5H, m), 6.48 (1H, s), 4.62 to 4.53 (3H, m), 4.23 (1H, d), 3.73 (3H, s), 1.97 (3H, s), 1.46 (6H, dd). <sup>13</sup>C NMR (101 MHz, CDCl<sub>3</sub>) δ 170.3, 166.1, 136.7, 135.6, 131.2, 129.7, 128.9, 128.7, 128.5, 128.3, 127.3, 127.2, 127.1, 77.7, 77.6, 77.3, 77.0, 76.7, 74.8, 68.0, 67.3, 64.9, 64.6, 61.8, 60.1, 52.6, 52.4, 51.9, 51.9, 48.0, 46.4, 46.0, 20.2, 30.0, 19.6, 19.3, 19.0, 18.9, 15.5, 14.6. **HRMS-EI<sup>+</sup>** (*m/z*): calc'd for C<sub>18</sub>H<sub>23</sub>NO<sub>4</sub> 317.1627; found 317.1622.

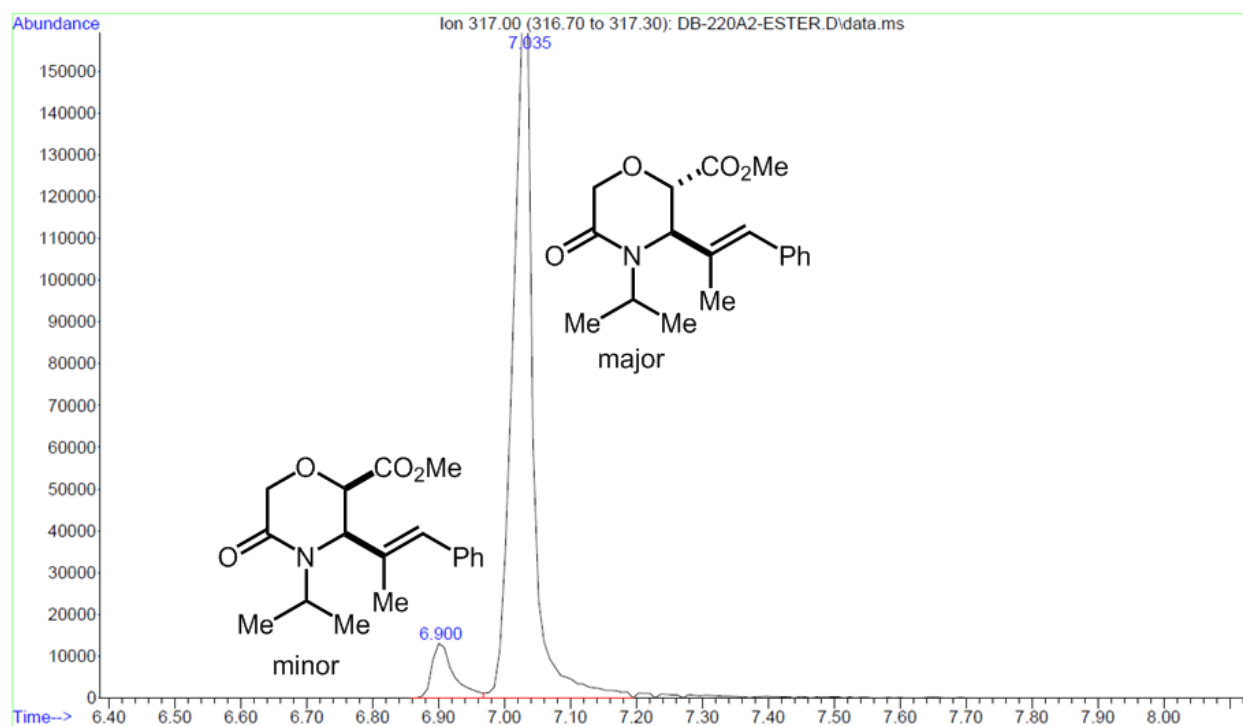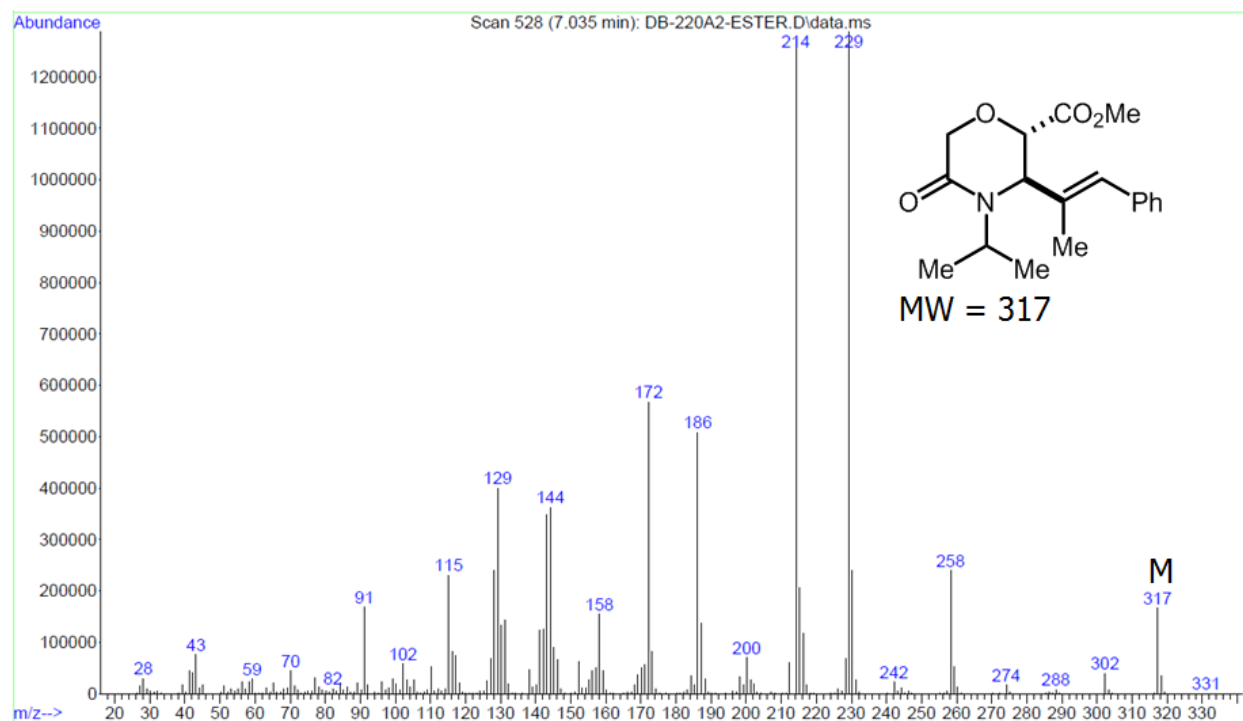

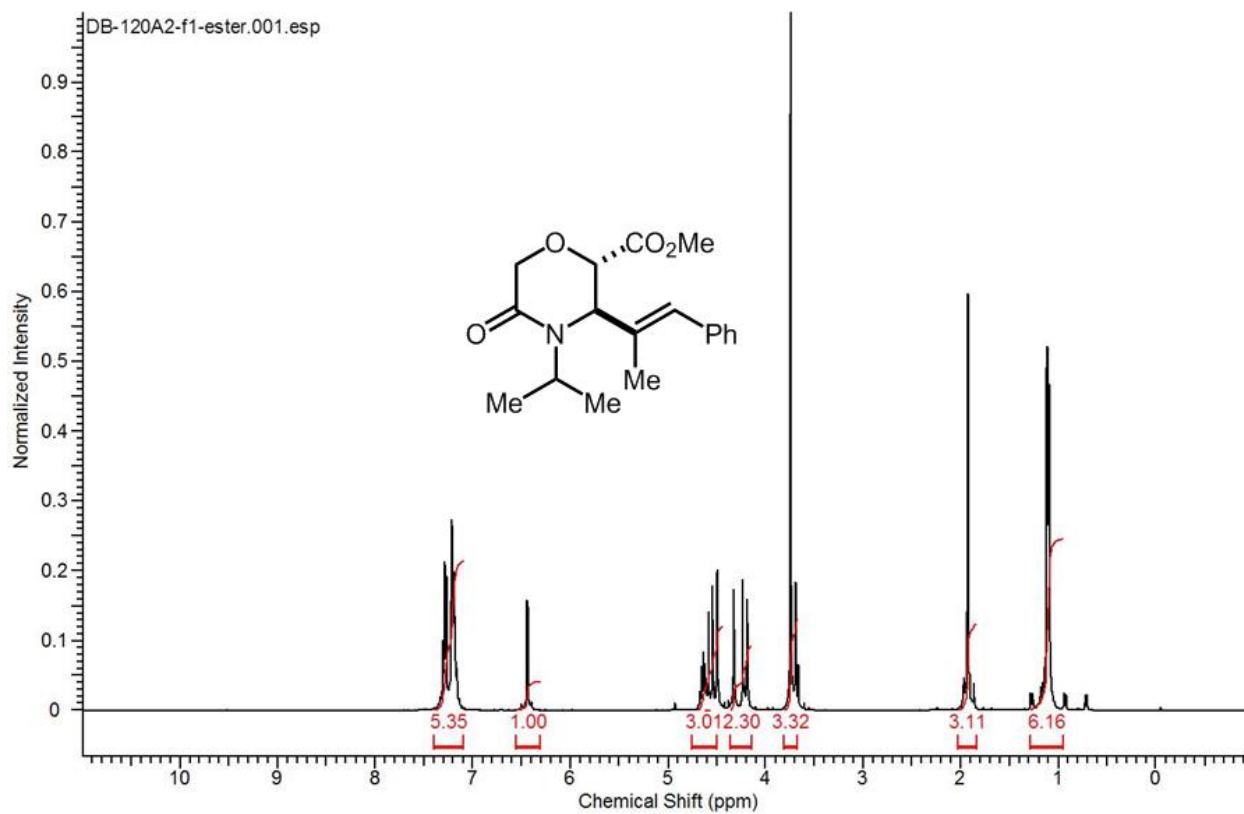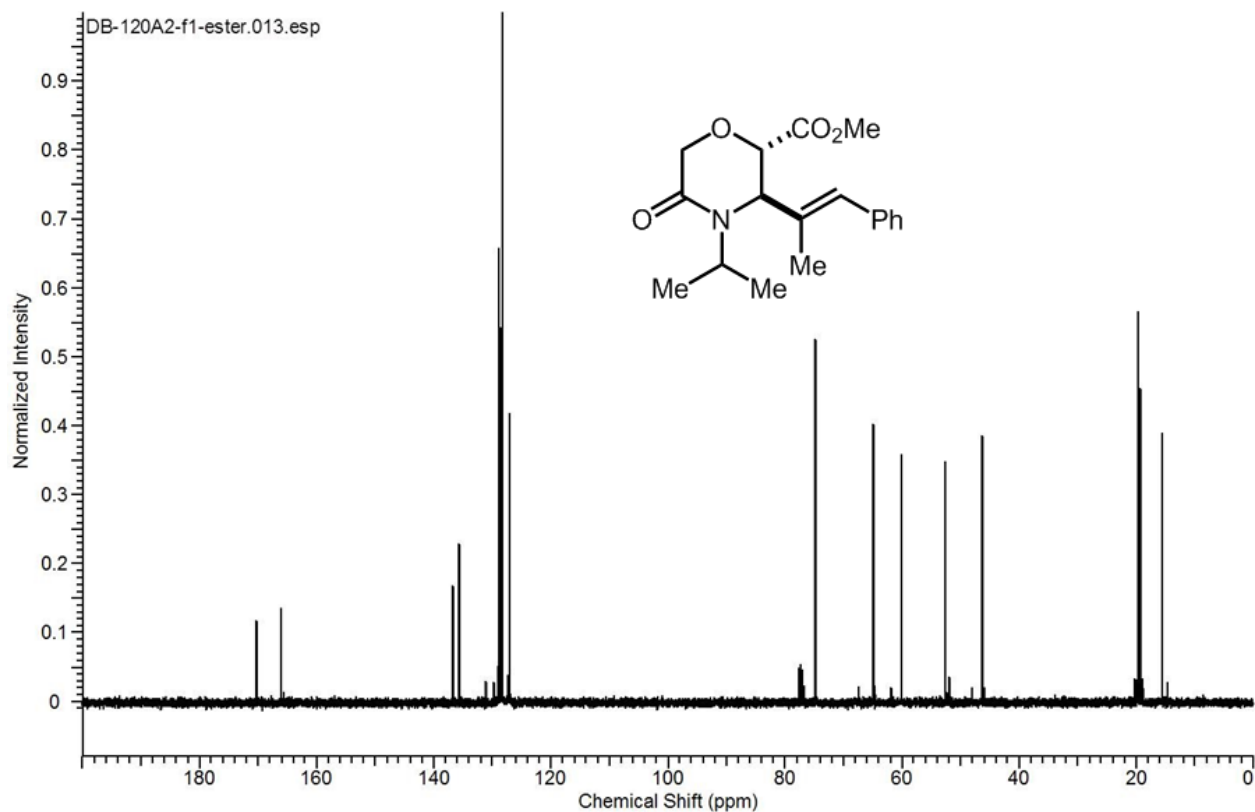

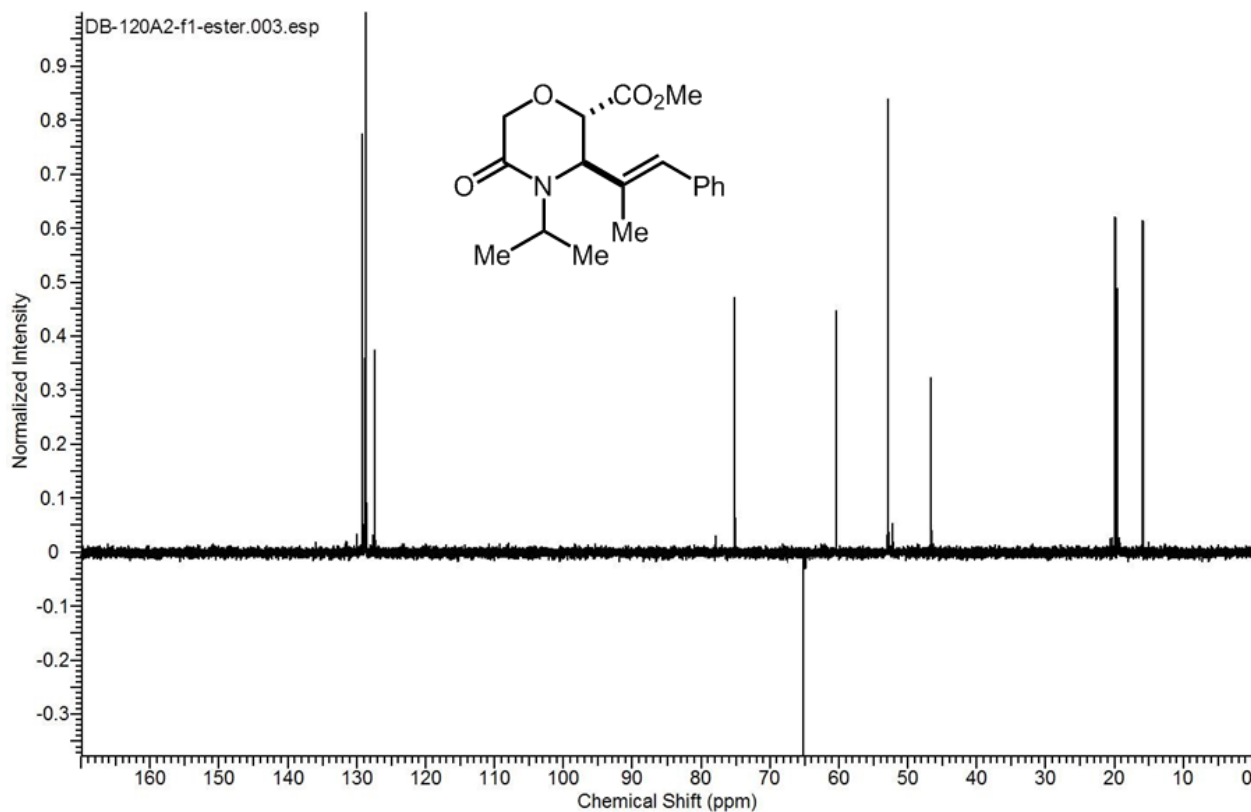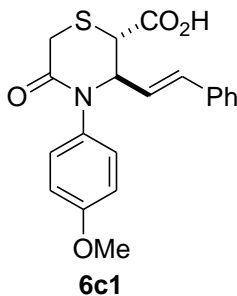

Prepared from imine **4b** (237 mg, 1.0 mmol) and thiodiglycolic anhydride (132 mg, 1.0 equiv), using General Procedure B. T = 60 °C, time = 12 h. An analytical sample was obtained after a series of washes with cold petroleum ether. Yield = 258 mg, 70%.  $^1\text{H}$  NMR (400 MHz,  $\text{CDCl}_3$ )  $\delta$  10.96 (1H, br. S), 7.52 to 7.09 (7H, m), 6.91 to 6.79 (2H, d), 6.58 to 6.32 (2H, m), 4.85 to 4.83 (1H, dd), 3.80 to 3.32 (6H, m).  $^{13}\text{C}$  NMR (101 MHz,  $\text{CDCl}_3$ )  $\delta$  173.19, 168.27, 158.78, 135.84, 134.61, 134.11, 130.75, 129.26, 128.06, 126.88, 122.31, 118.93, 66.58, 55.96, 44.84, 28.34.

**HRMS-EI+** ( $m/z$ ): calc'd for  $\text{C}_{20}\text{H}_{19}\text{NO}_4\text{S}$  369.1035; found 369.1039.

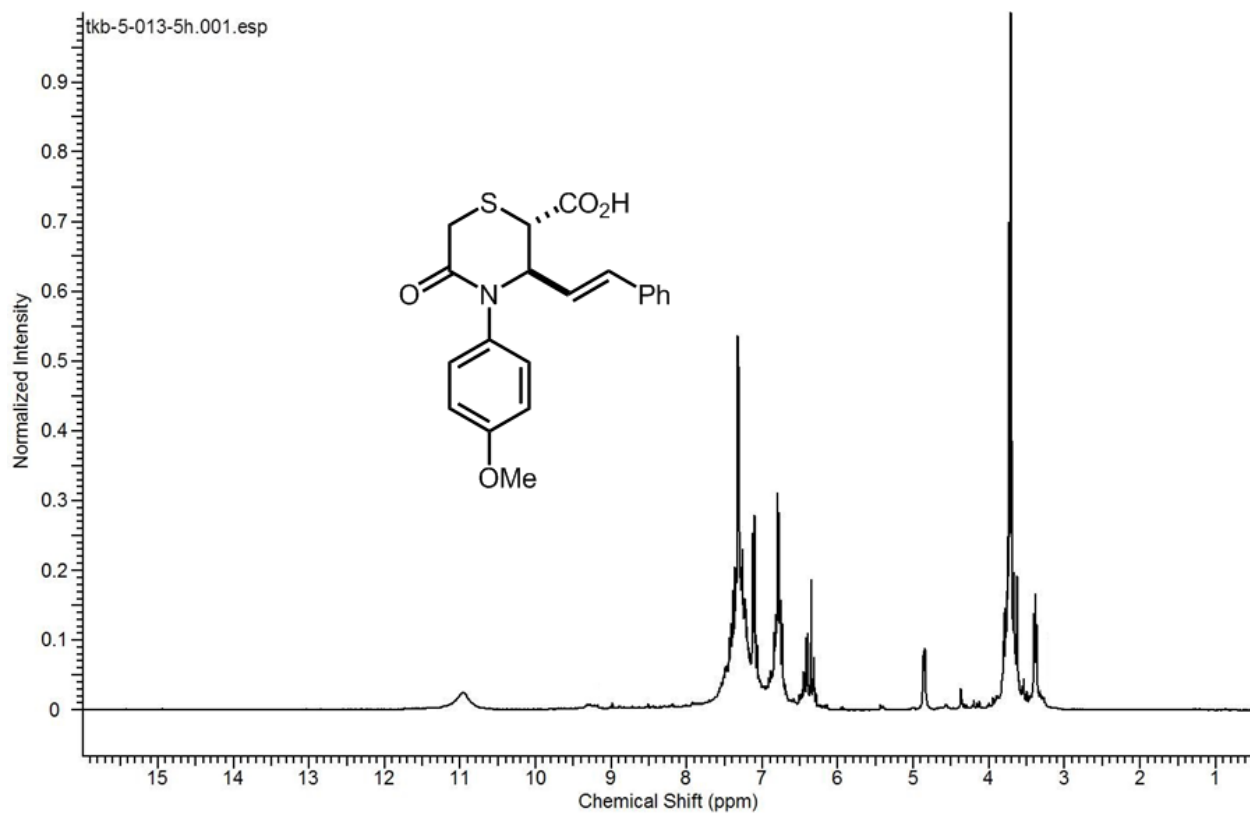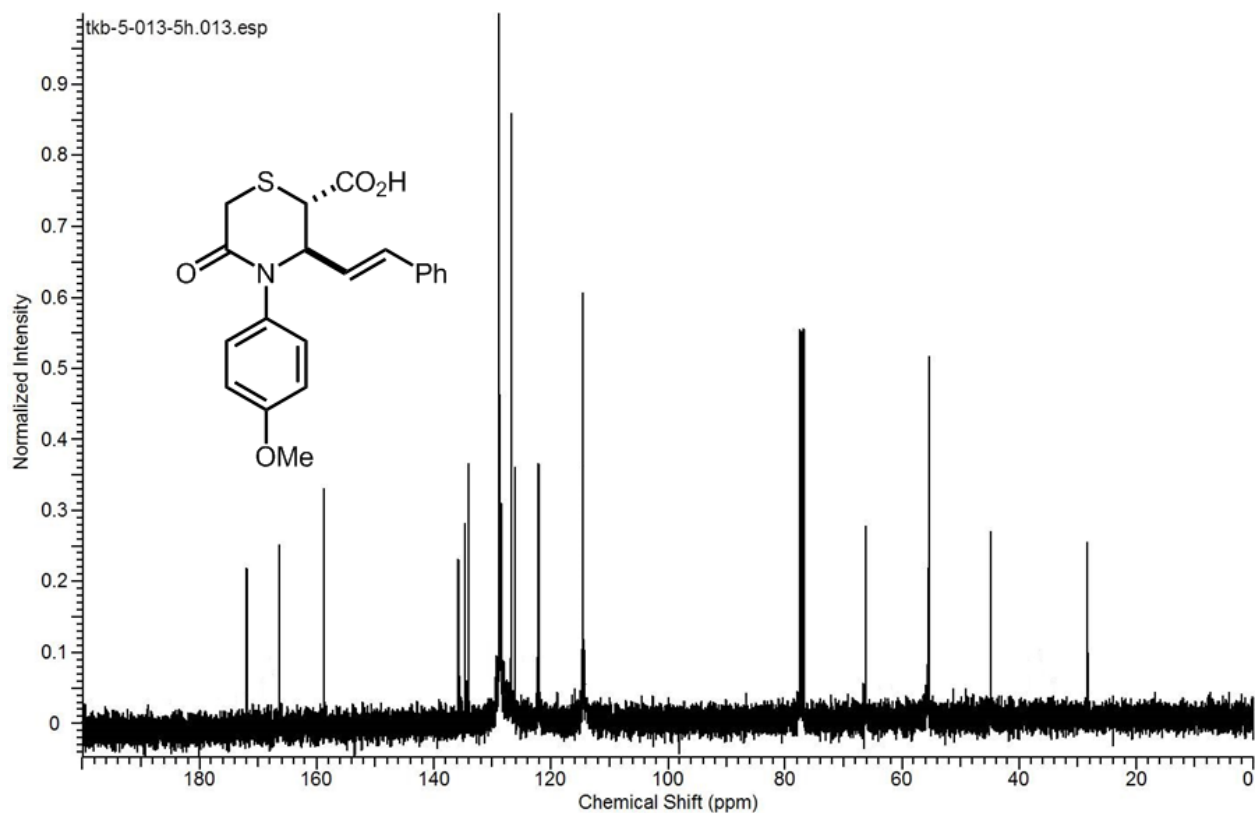

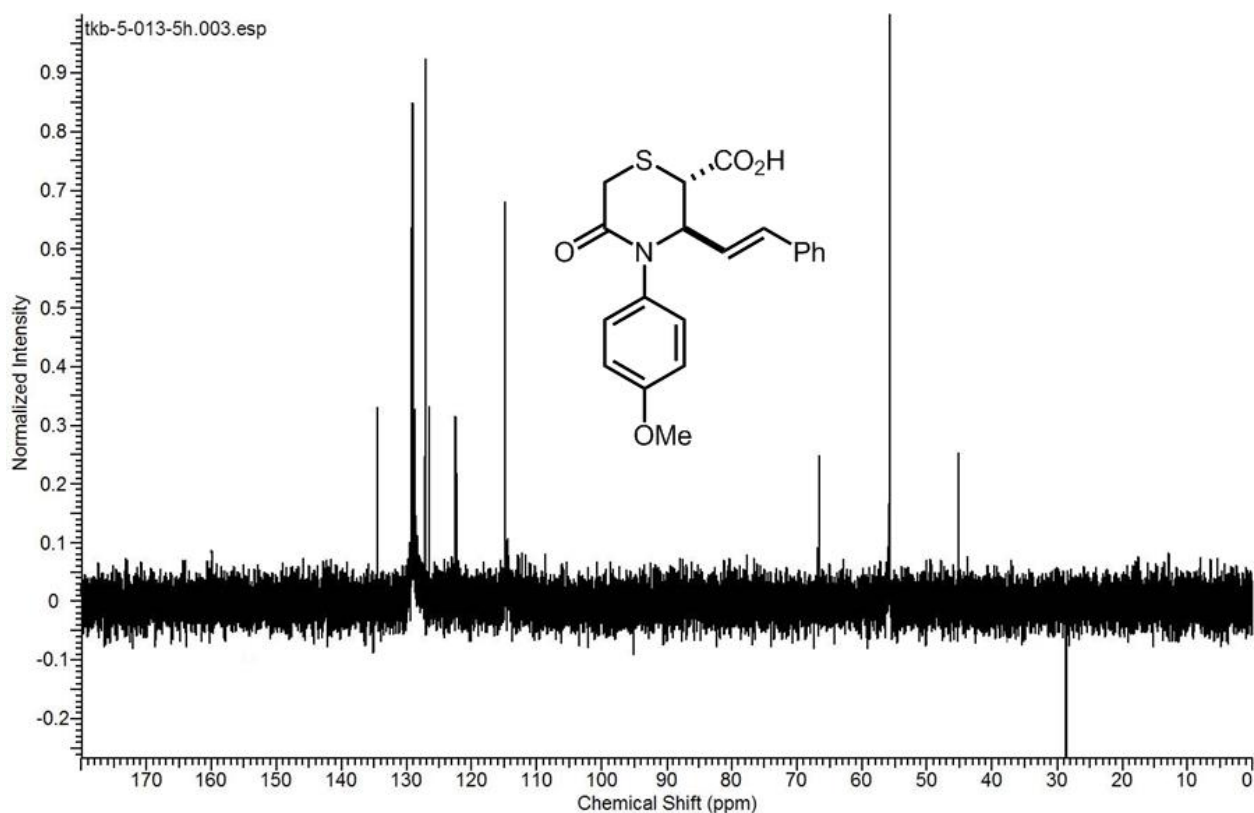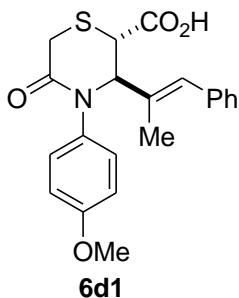

Prepared from imine **4i** (251 mg, 1.0 mmol) and thiodiglycolic anhydride (132 mg, 1.0 equiv) using General Procedure B. T = 60 °C, time = 12 h. Yield = 280 mg, 73%.  $^1\text{H}$  NMR (400 MHz,  $\text{CDCl}_3$ )  $\delta$  11.02 (1H, s br), 7.55 to 7.08 (5H, m), 6.95 to 6.81 (2H, d), 6.41 (1H, s), 4.89 (1H, d), 3.85 to 3.30 (6H, m), 1.86 (3H, s).  $^{13}\text{C}$  NMR (101 MHz,  $\text{CDCl}_3$ )  $\delta$  172.48, 167.36, 158.59, 136.78, 135.18, 133.62, 130.15, 129.38, 129.02, 128.75, 127.09, 118.12, 71.05, 55.45, 43.98, 28.66, 18.23. **HRMS- $\text{EI}^+$**  ( $m/z$ ): calc'd for  $\text{C}_{21}\text{H}_{21}\text{NO}_4\text{S}$  383.1191; found 383.1187.

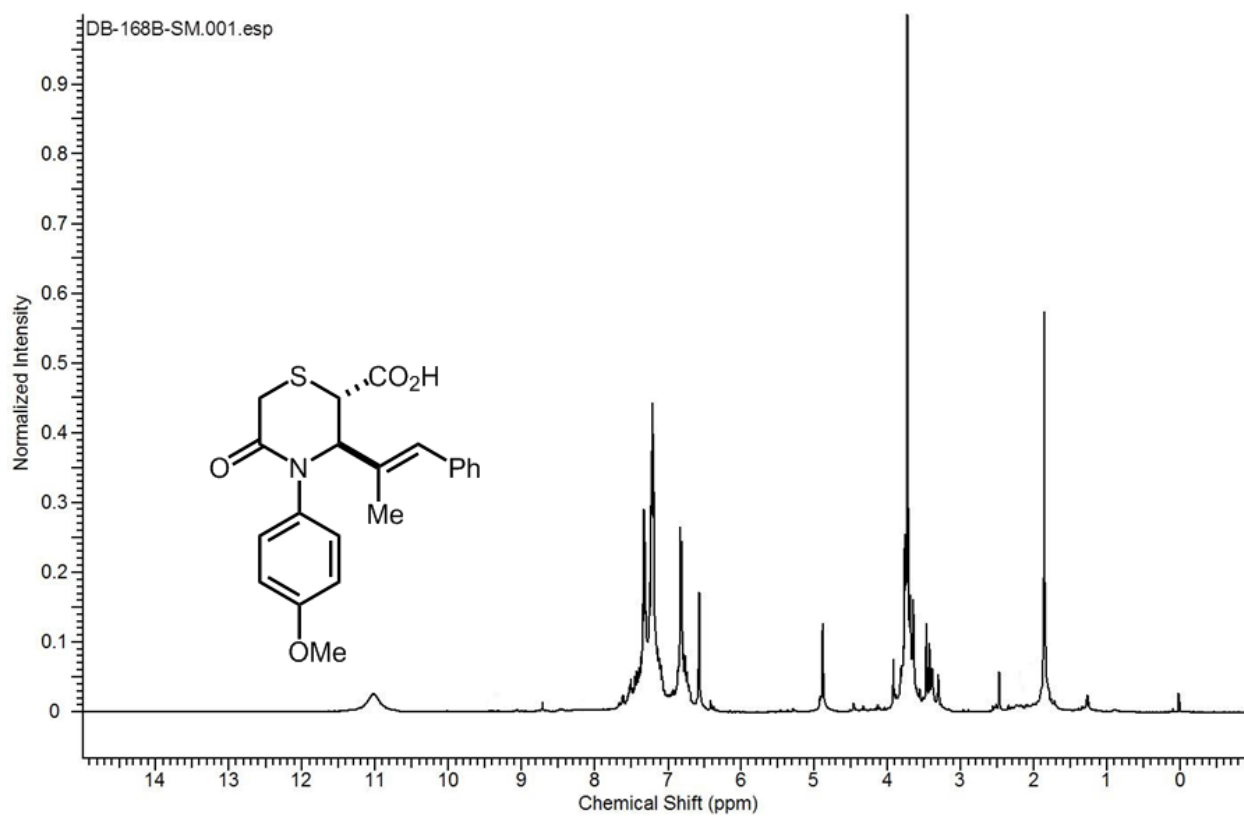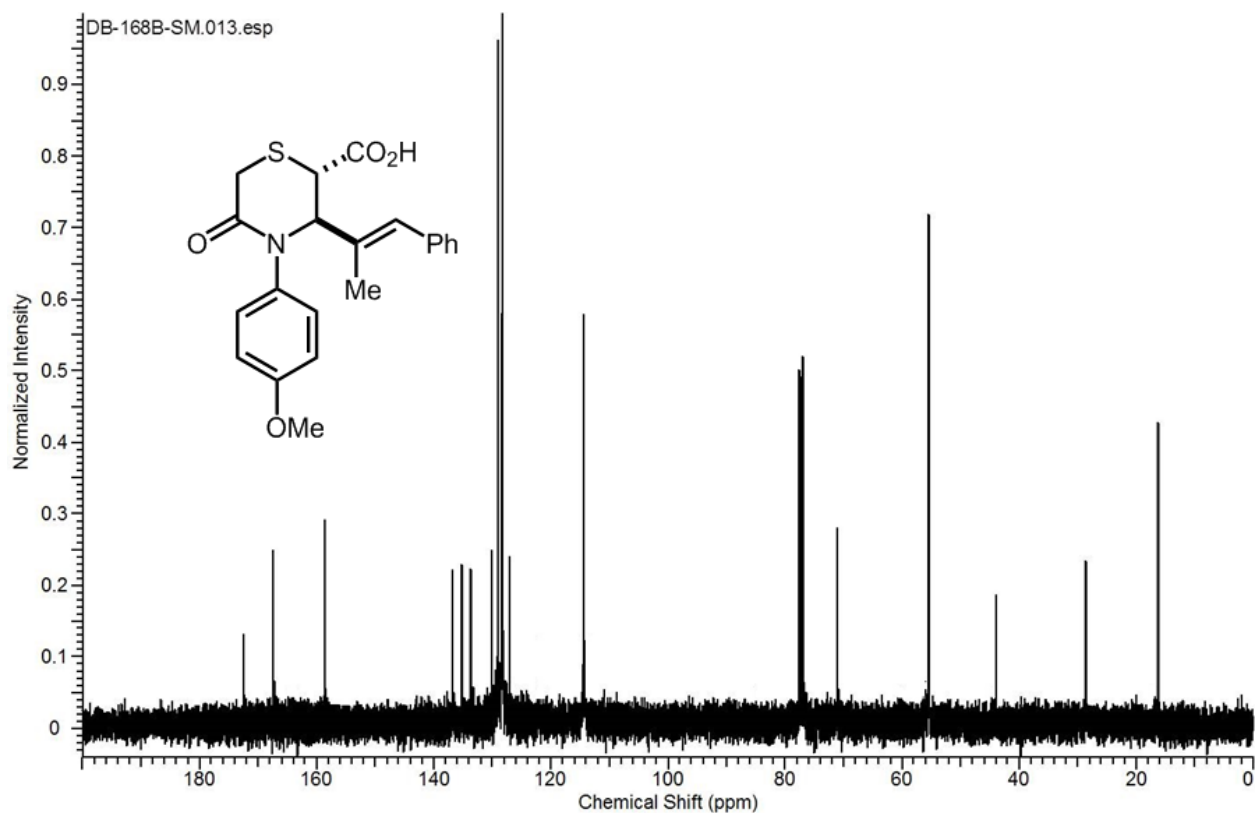



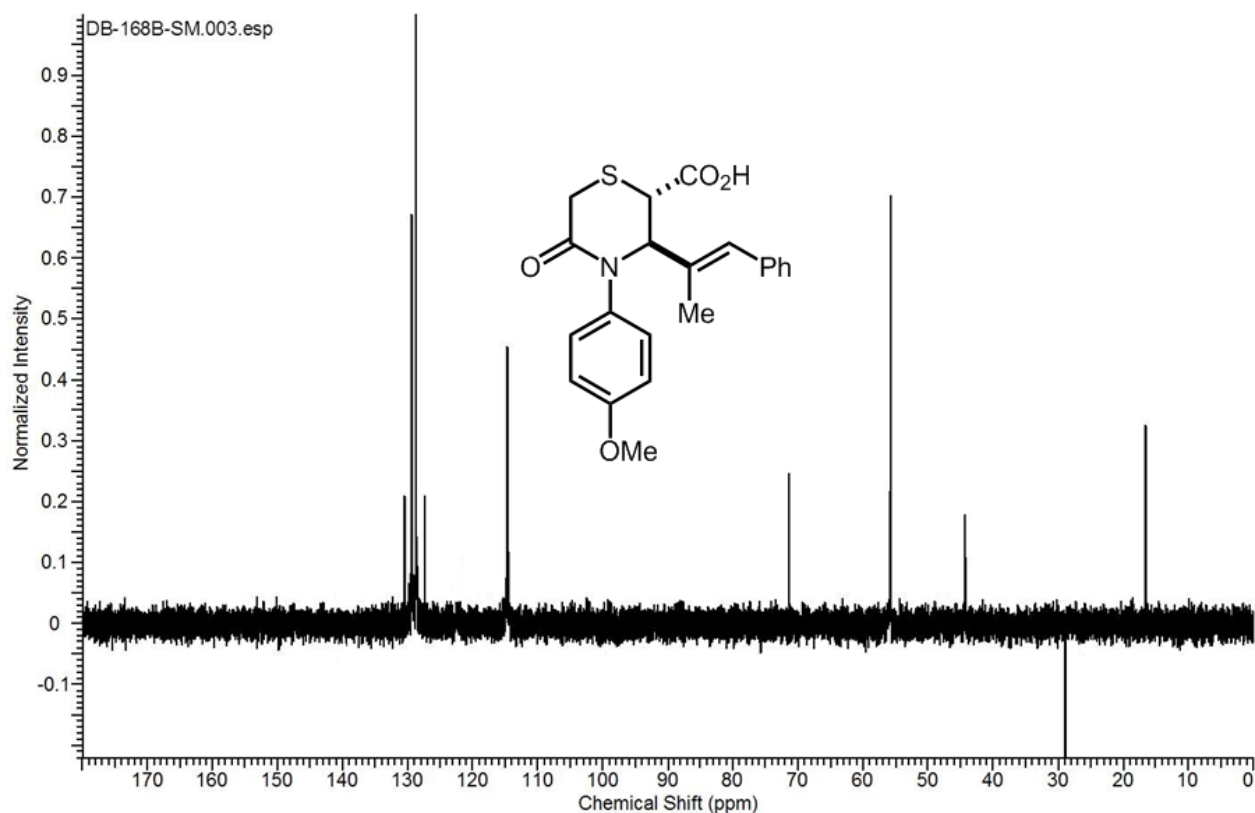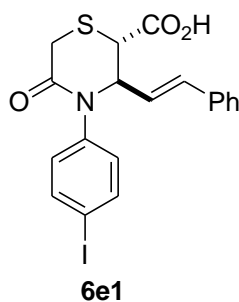

Prepared from thiodiglycolic anhydride (132 mg, 1.0 equiv) using General Procedure B. T = 60 °C, time = 16 h. Yield = 363 mg, 78%.  $^1\text{H}$  NMR (400 MHz,  $\text{CDCl}_3$ )  $\delta$  11.05 (1H, s br), 7.66 to 7.57 (2H, d), 7.38 to 7.19 (5H, m), 6.95 (2H, d), 6.46 to 6.39 (2H, m), 4.86 to 4.81 (1H, dd), 3.73 to 3.36 (3H, m).  $^{13}\text{C}$  NMR (101 MHz,  $\text{CDCl}_3$ )  $\delta$  174.84, 168.17, 141.39, 138.6, 137.99, 136.24, 134.74, 129.78, 128.78, 126.90, 125.35, 93.71, 66.28, 44.34, 28.27. **HRMS- $\text{EI}^+$**  ( $m/z$ ): calc'd for  $\text{C}_{19}\text{H}_{16}\text{INO}_3\text{S}$  464.9896; found 465.0007.

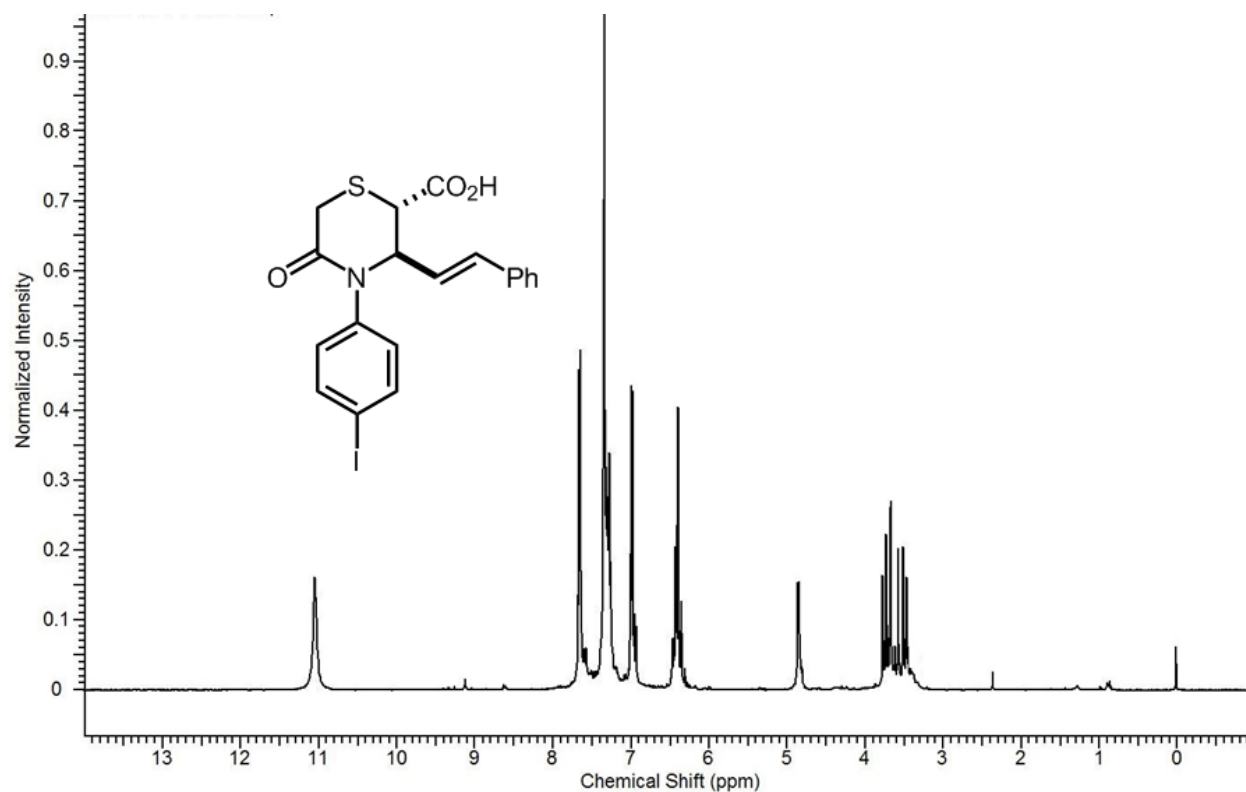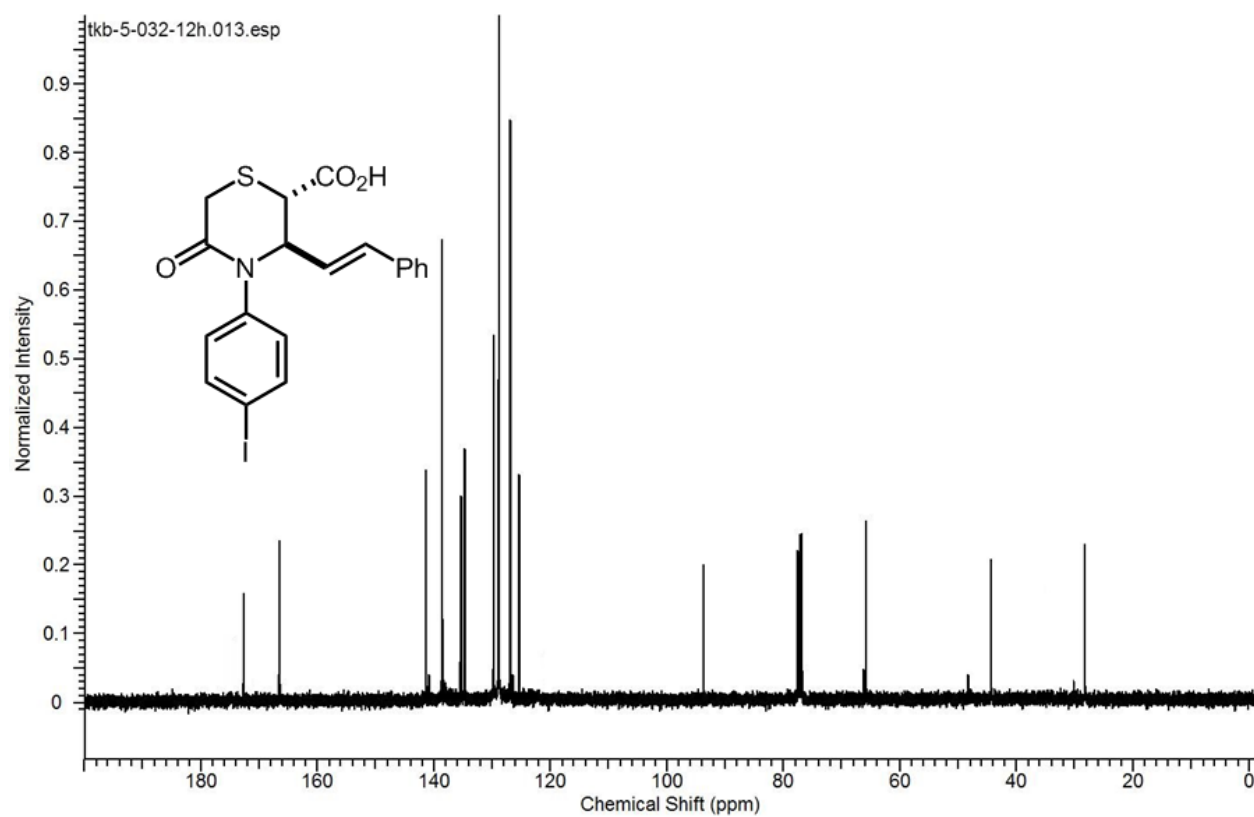

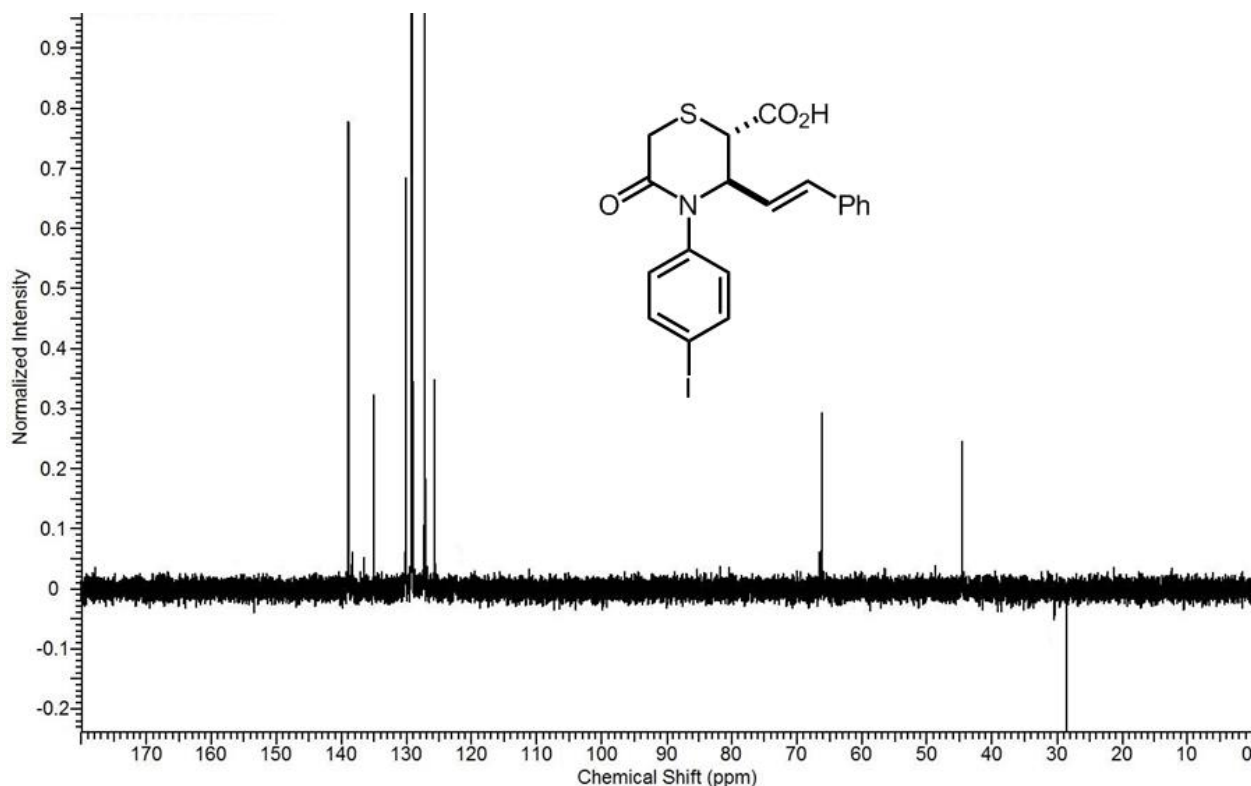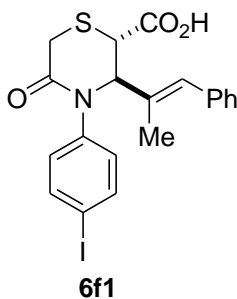

Prepared from thiodiglycolic anhydride (132 mg, 1.0 equiv) using General Procedure B. T = 60 °C, time = 22 h. Yield = 407 mg, 85%.  $^1\text{H}$  NMR (400 MHz,  $\text{CDCl}_3$ )  $\delta$  11.04 (1H, s br), 7.81 to 7.03 (9H, m), 6.59 (1H, s), 4.88 (1H, d), 3.83 to 3.36 (3H, m), 1.87 (3H, s).  $^{13}\text{C}$  NMR (101 MHz,  $\text{CDCl}_3$ )  $\delta$  174.93, 167.29, 141.96, 139.91, 138.46, 132.90, 130.73, 129.19, 128.45, 128.03, 127.41, 93.28, 70.43, 43.23, 28.53, 18.53. **HRMS- $\text{EI}^+$**  ( $m/z$ ): calc'd for  $\text{C}_{20}\text{H}_{18}\text{INO}_3\text{S}$  479.0052; found 479.0061.

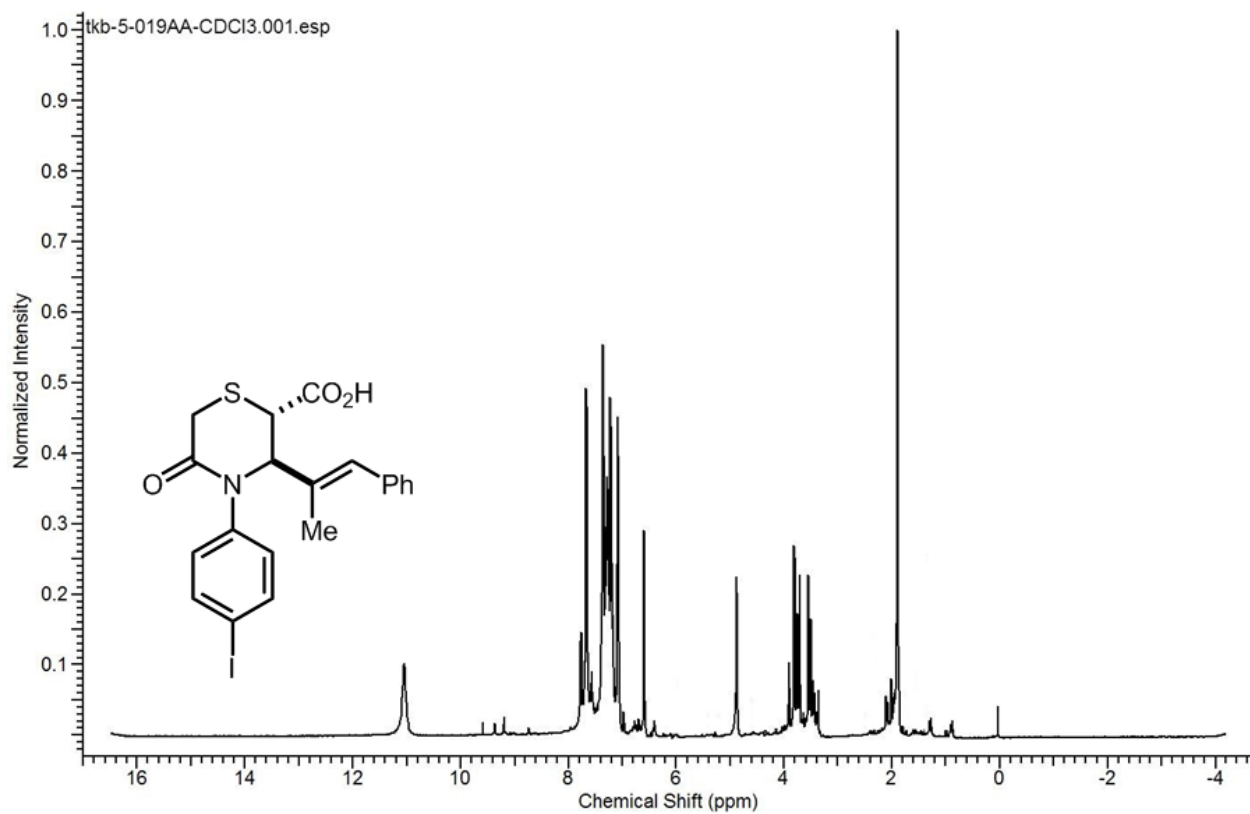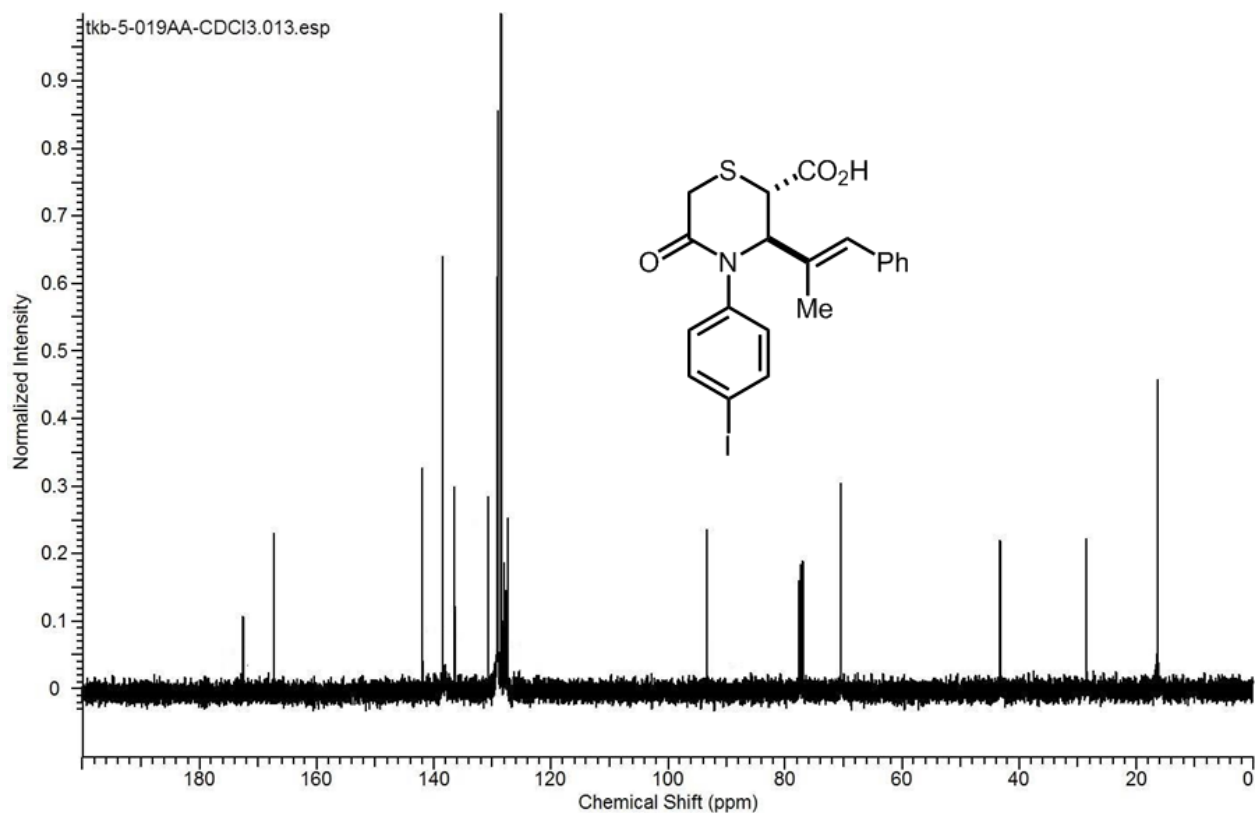

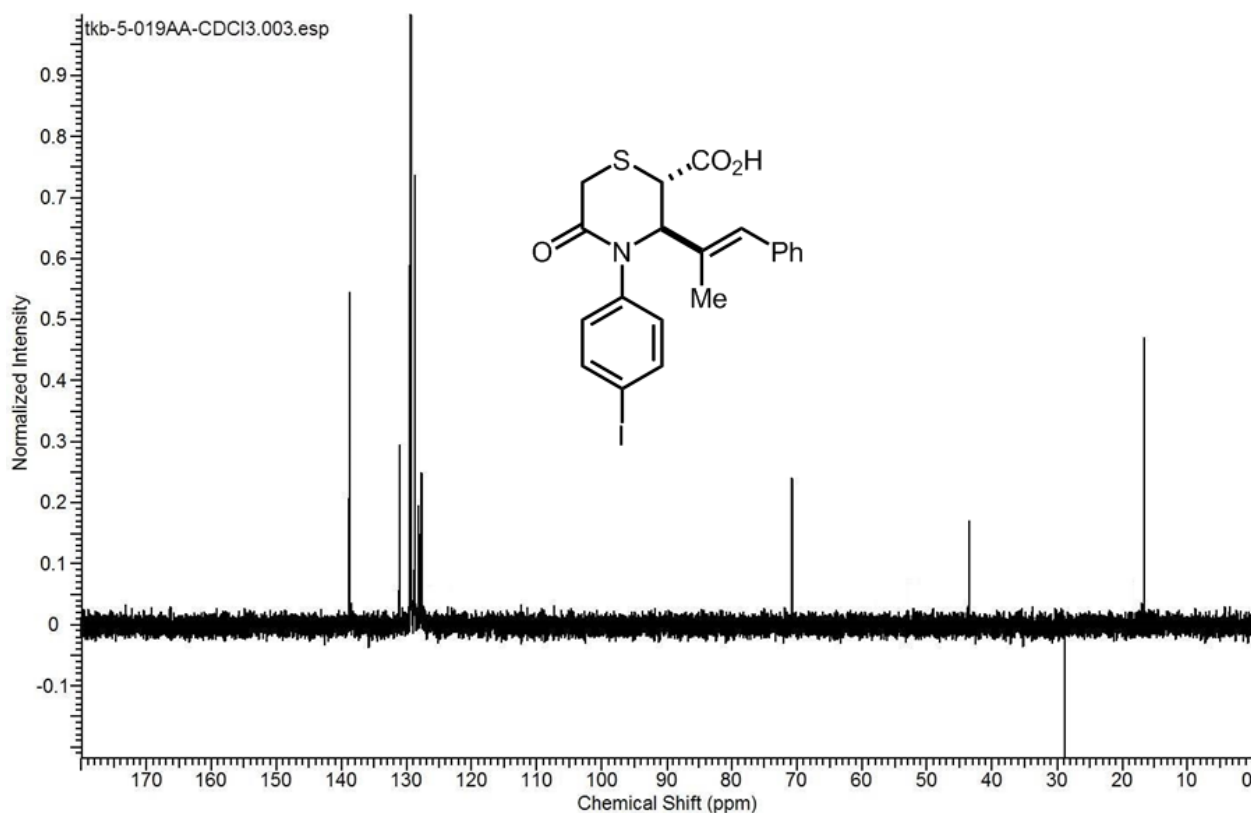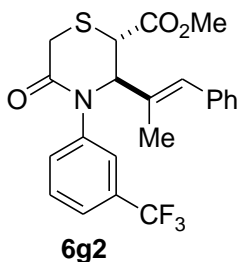

Prepared from thiodiglycolic anhydride (132 mg, 1.0 equiv) using General Procedures B & C. T = 60 °C, time = 22 h. Yield = 387 mg, 89%.  $^1\text{H}$  NMR (400 MHz,  $\text{CDCl}_3$ )  $\delta$  7.61 to 7.18 (9H, m), 6.62 (1H, s), 4.93 (1H, d), 3.93 to 3.87 (4H, m), 3.57 to 3.39 (2H, m), 1.96 (3H, s).  $^{13}\text{C}$  NMR (101 MHz,  $\text{CDCl}_3$ )  $\delta$  170.37, 165.93, 152.71, 142.86, 141.45, 136.25, 133.03, 131.15, 130.83, 129.73, 129.70, 129.54, 128.52, 128.32, 127.40, 124.35, 124.31, 124.06, 122.78, 70.83, 53.38, 43.75, 29.05, 18.18. **HRMS- $\text{EI}^+$**  ( $m/z$ ): calc'd for  $\text{C}_{23}\text{H}_{20}\text{F}_3\text{NO}_3\text{S}$  435.1116; found 435.1121.

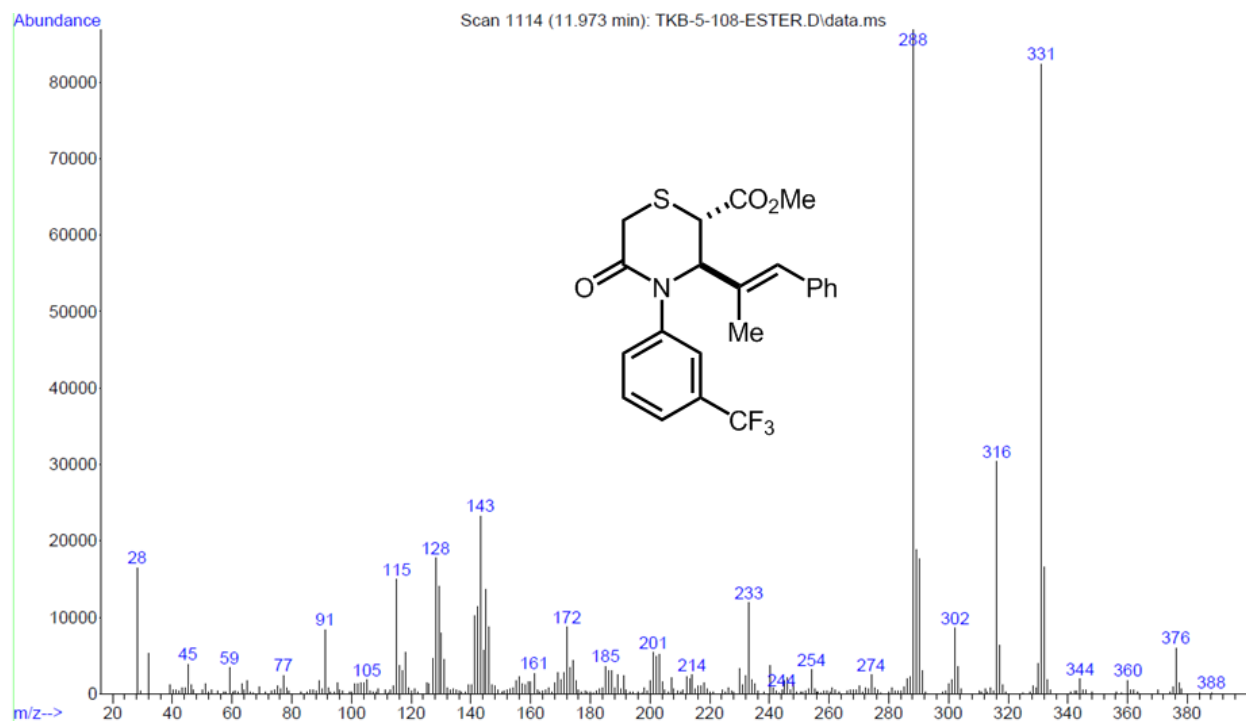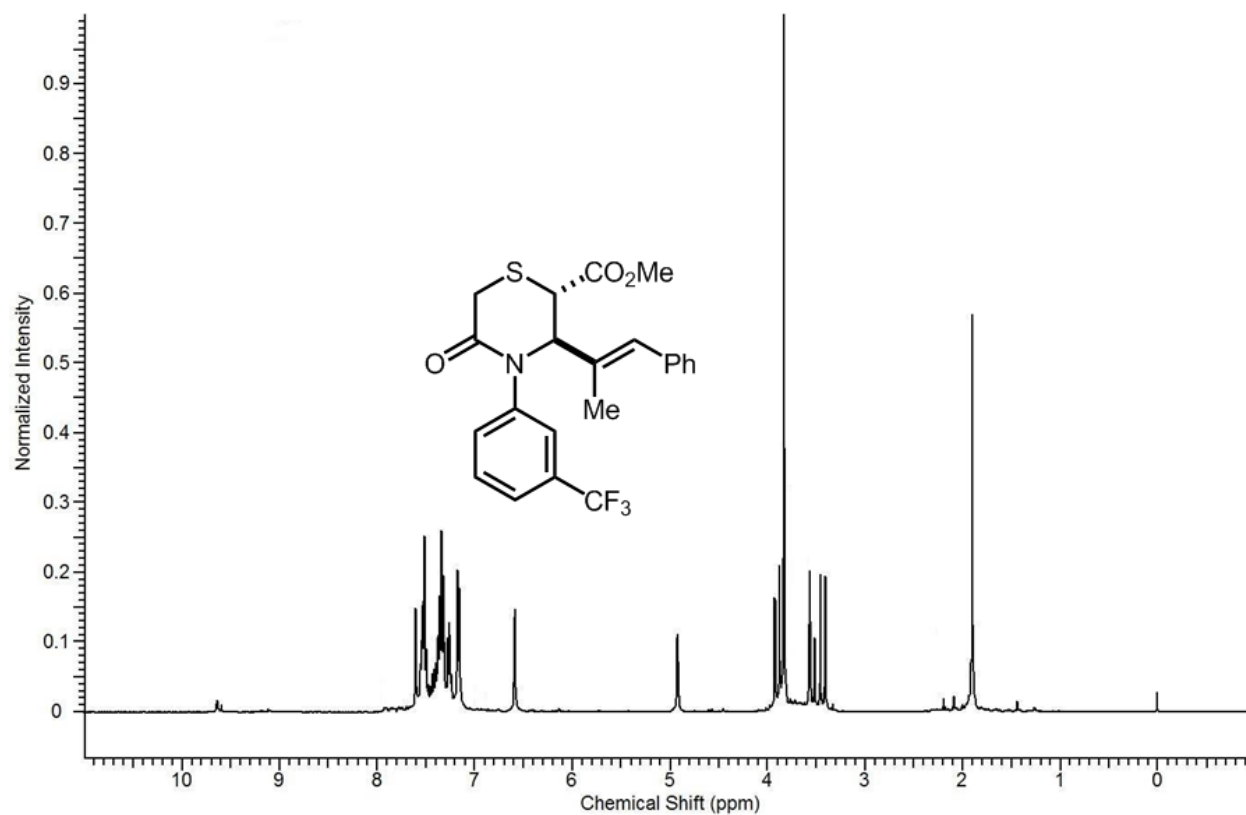

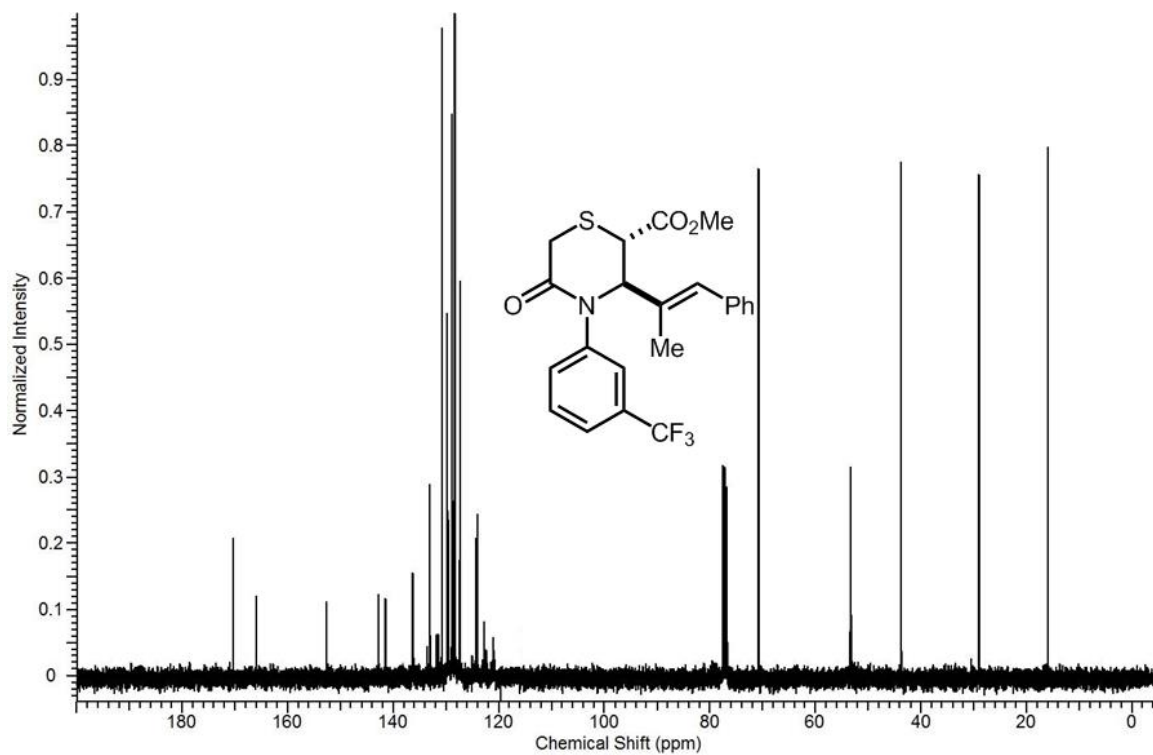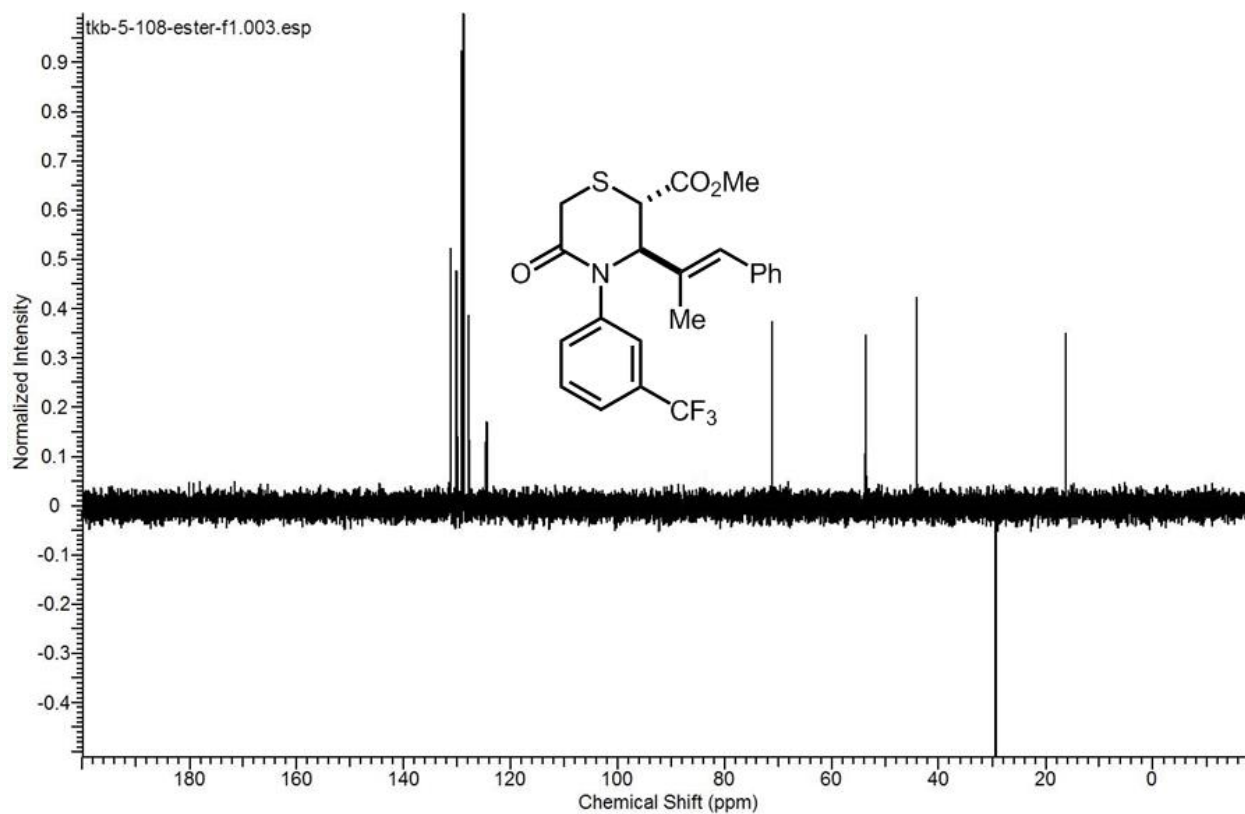

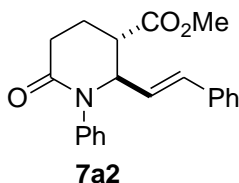

Prepared from imine **4a** and glutaric anhydride (114 mg, 1 equiv) using General Procedures B and C. Temp = 105 °C, time = 18 h. Purification: Flash chromatography on silica eluting with hexane/EtOAc (50:50 to 0:100) then 100% MeOH. Yield = 268 mg, 80% over 2 steps, 95:5 dr.  $^1\text{H}$  NMR (400 MHz,  $\text{CDCl}_3$ )  $\delta$  7.47 to 7.05 (10H, m), 6.39 (1H, d), 6.15 to 6.09 (1H, dd), 4.92 to 4.89 (1H, d), 3.79 (3H, s), 2.97 to 2.93 (1H, m), 2.73 to 2.61 (2H, m), 2.42 to 2.25 (2H, m).  $^{13}\text{C}$  NMR (101 MHz,  $\text{CDCl}_3$ )  $\delta$  172.5, 169.3, 141.9, 135.8, 134.8, 133.3, 129.1, 128.8, 128.2, 127.7, 127.3, 126.5, 124.4, 63.8, 52.5, 44.5, 29.9, 20.4. **HRMS-ESI<sup>+</sup>** ( $m/z$ ): calc'd for  $\text{C}_{21}\text{H}_{21}\text{NO}_3$  335.1521; found 335.1525.

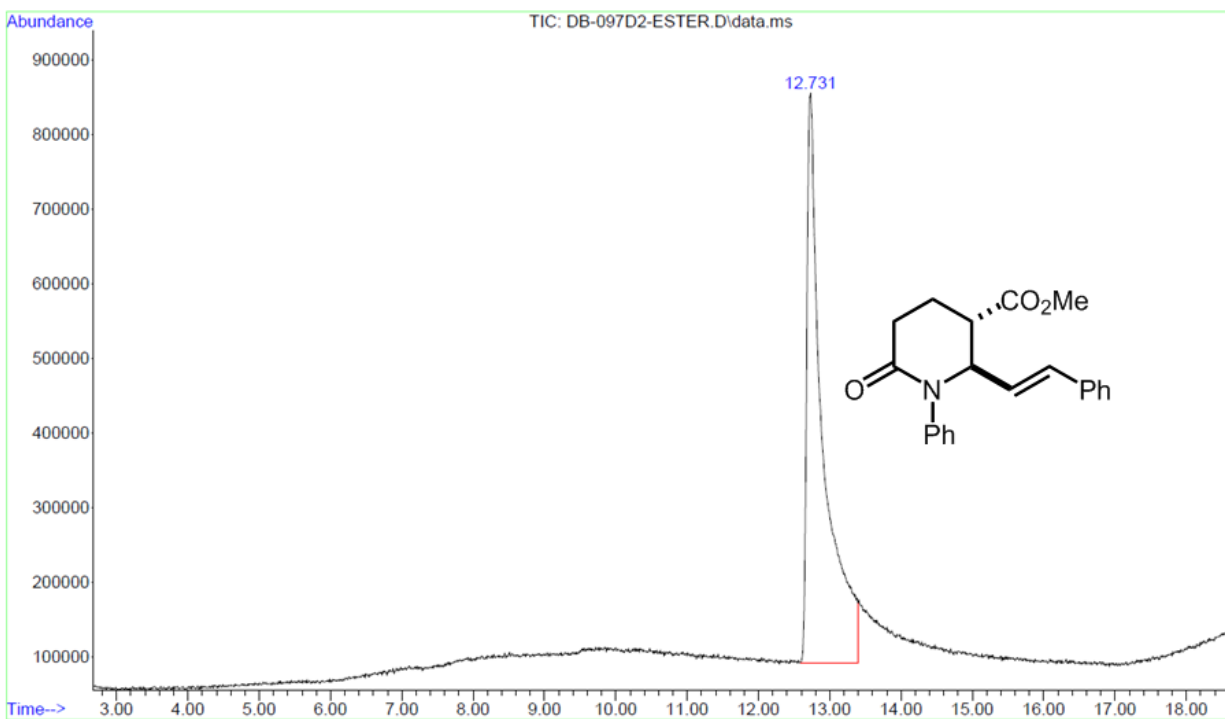



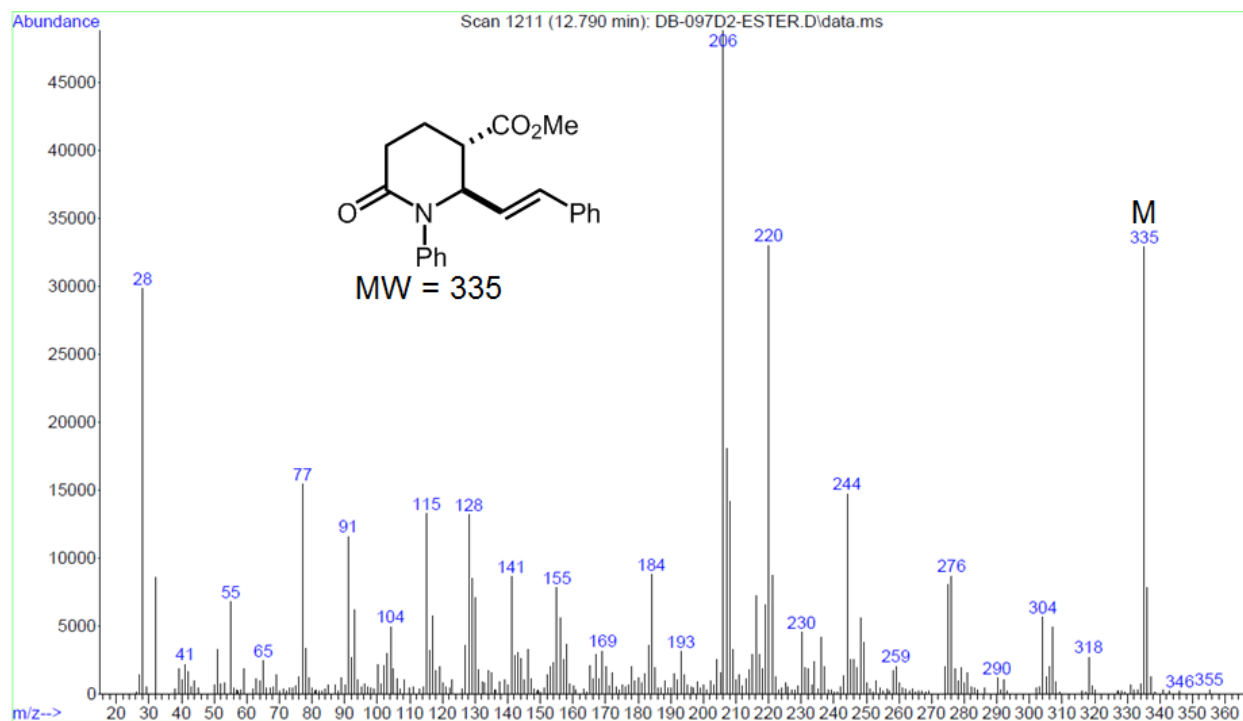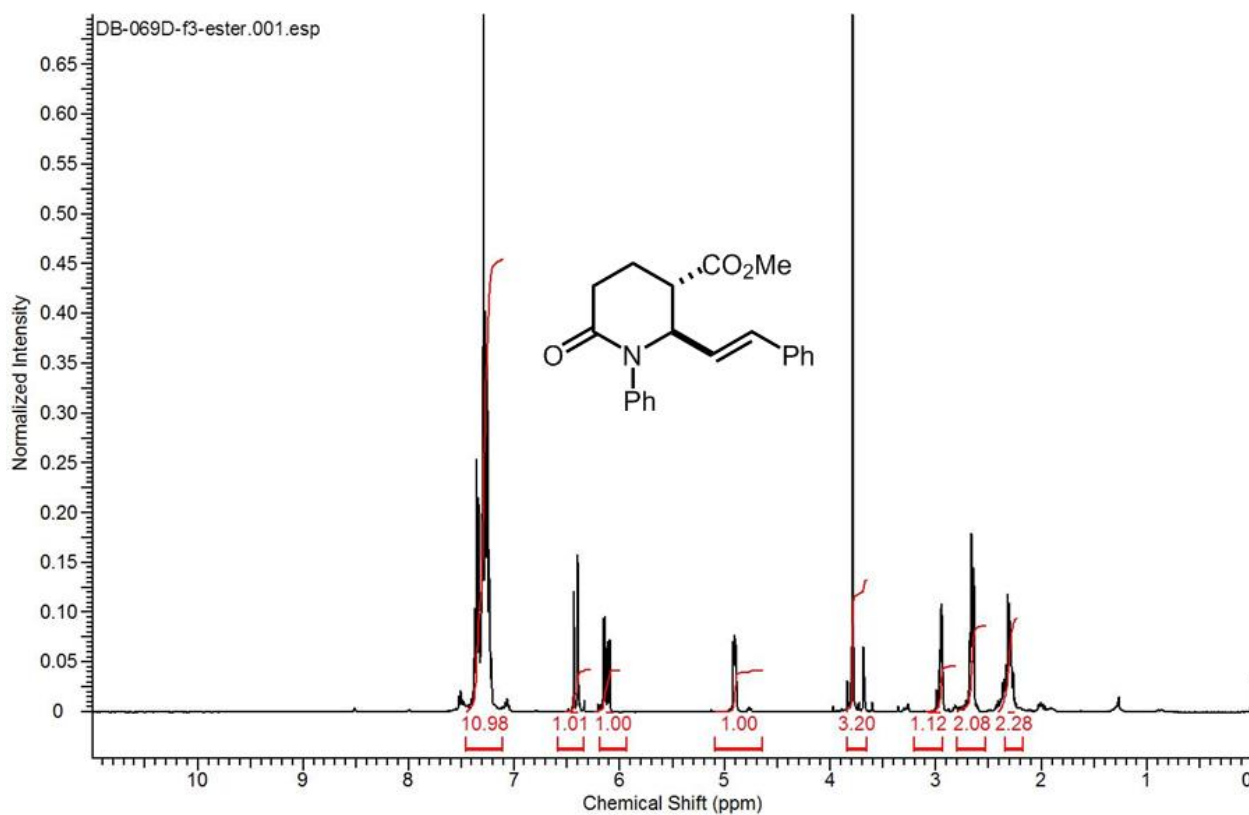

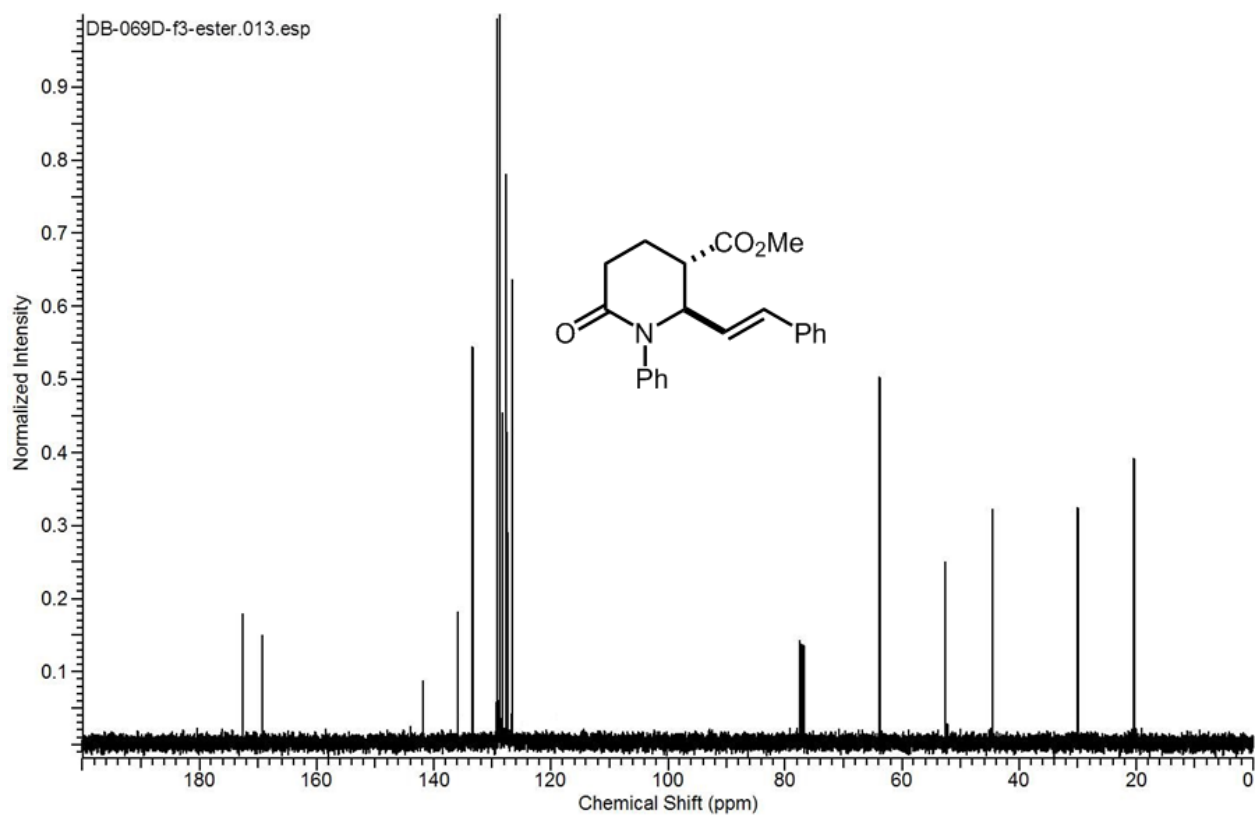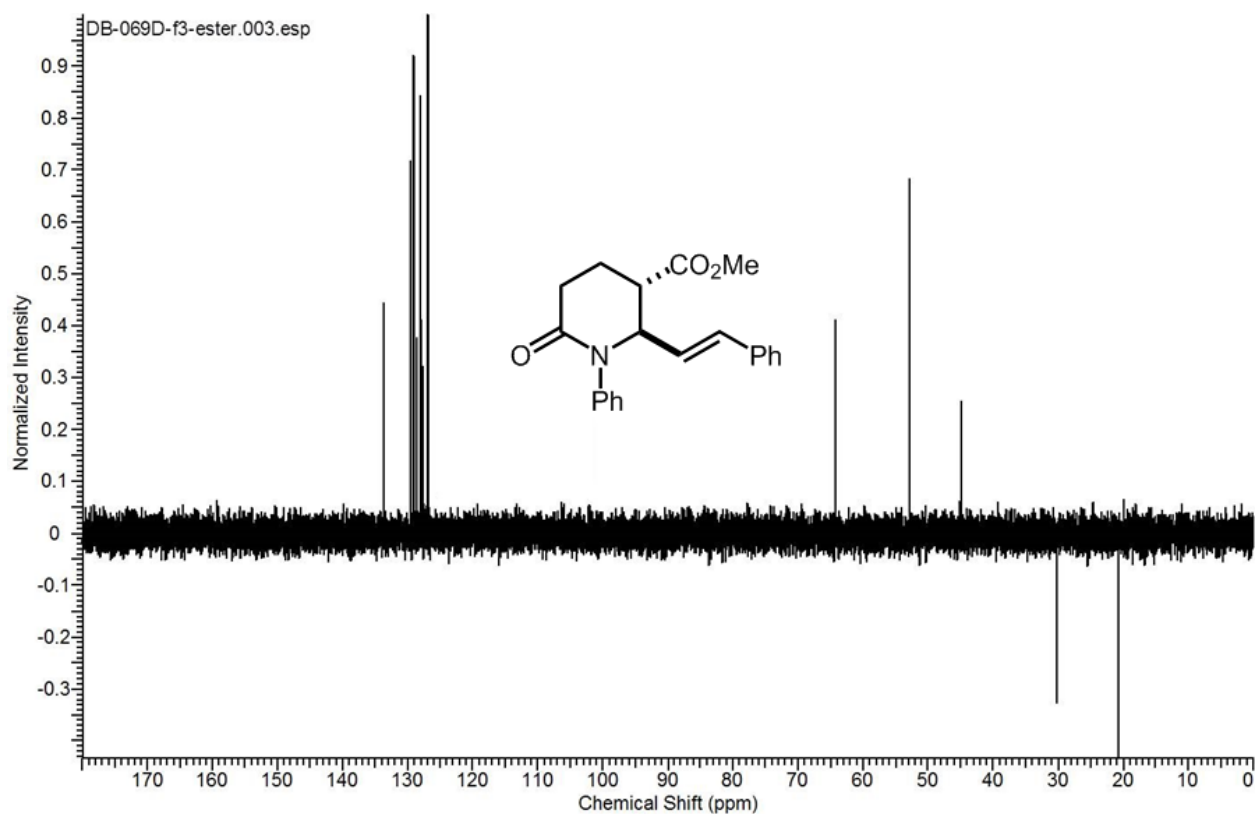

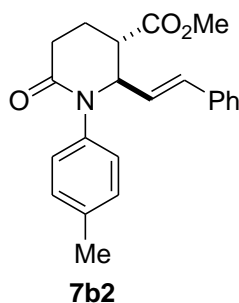

Prepared from imine **4c** (221 mg, 1.0 mmol) and glutaric anhydride (114 mg, 1.0 equiv), using General Procedures B and C. T = 105 °C, time = 18 h. Purification: Flash chromatography on silica eluting with hexane/EtOAc (50:50 to 0:100) then 100% MeOH. Yield = 304 mg, 87% over 2 steps, 95:5 dr.  $^1\text{H}$  NMR (400 MHz,  $\text{CDCl}_3$ )  $\delta$  7.38 to 7.00 (9H, m), 6.41 to 6.34 (1H, d), 6.18 to 6.10 (1H, dd), 4.90 to 4.87 (1H, dd), 3.77 (3H, s), 2.96 to 2.93 (1H, m), 2.70 to 2.61 (2H, m), 2.41 to 2.28 (5H, m).  $^{13}\text{C}$  NMR (101 MHz,  $\text{CDCl}_3$ )  $\delta$  172.5, 169.4, 139.3, 137.0, 135.9, 134.8, 133.2, 130.0, 129.8, 129.3, 128.7, 128.3, 128.2, 128.1, 127.7, 127.47, 127.3, 126.7, 126.6, 124.5, 63.9, 52.5, 44.5, 29.9, 21.1, 20.8. **HRMS- $\text{EI}^+$**  ( $m/z$ ): calc'd for  $\text{C}_{22}\text{H}_{23}\text{NO}_3$  349.1678; found 349.1672.

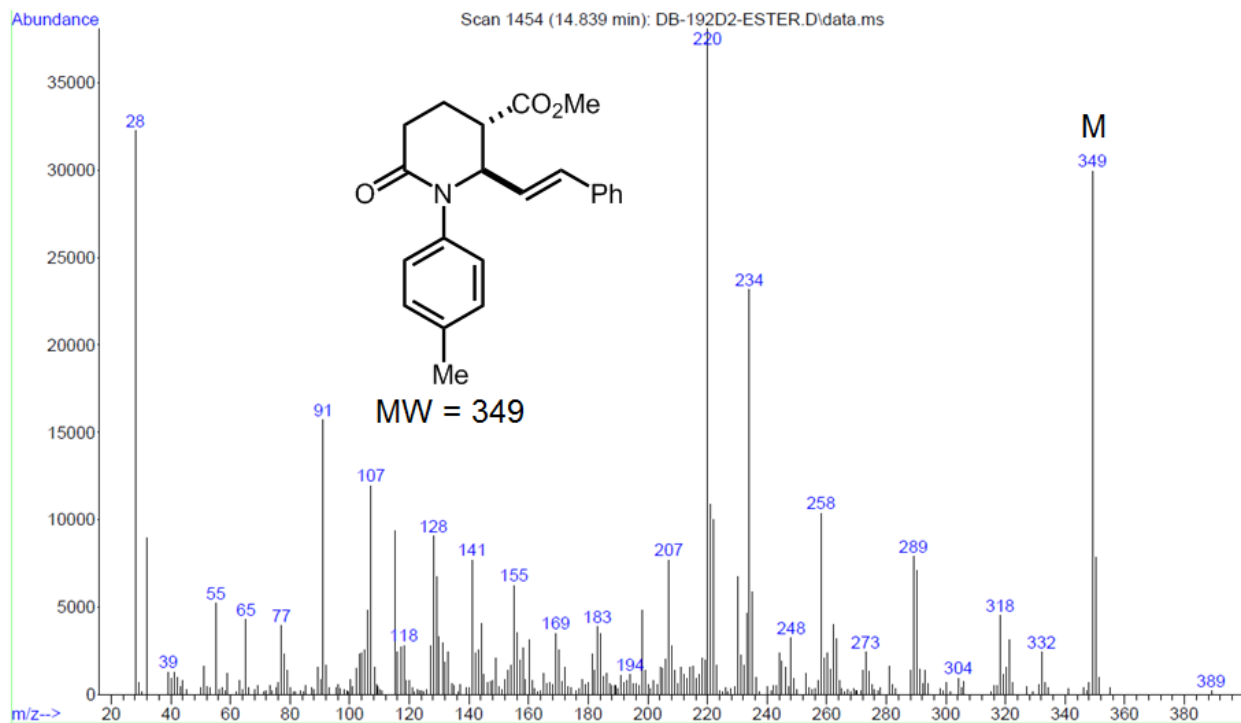

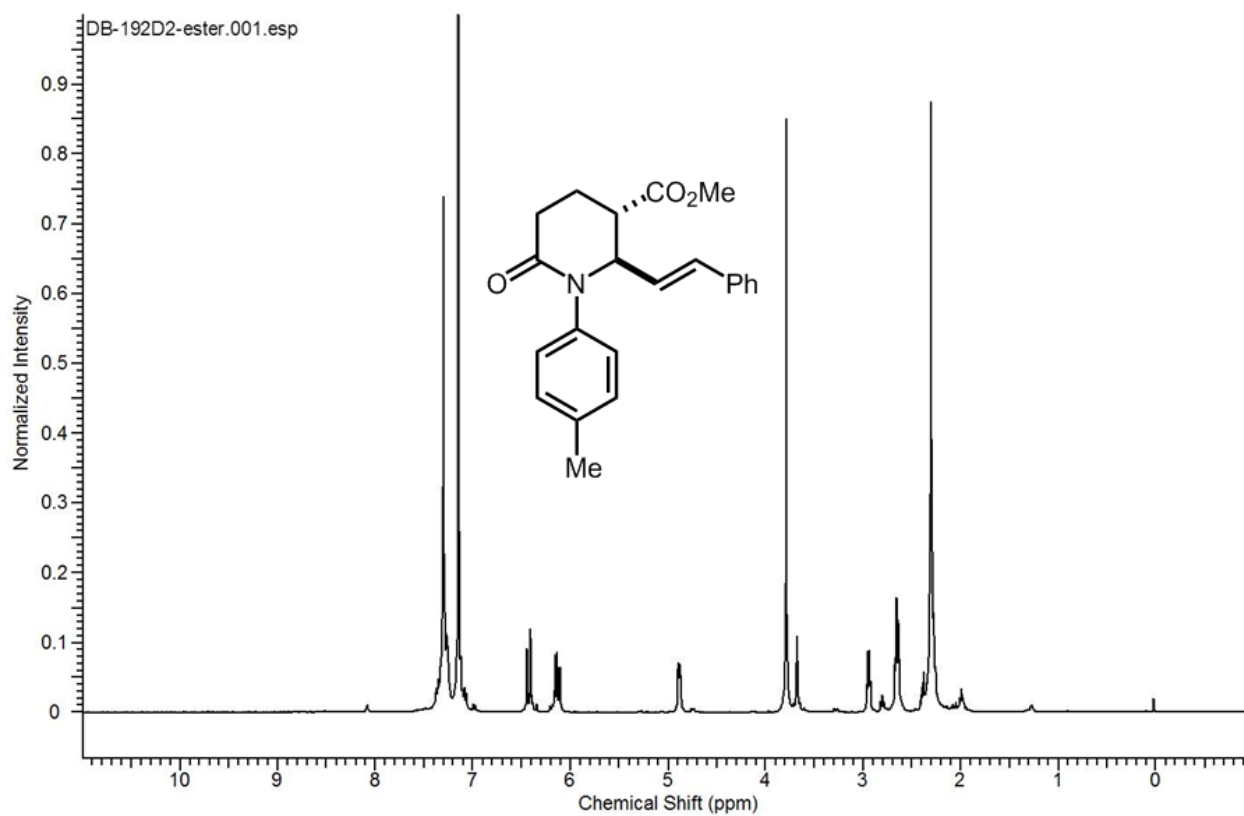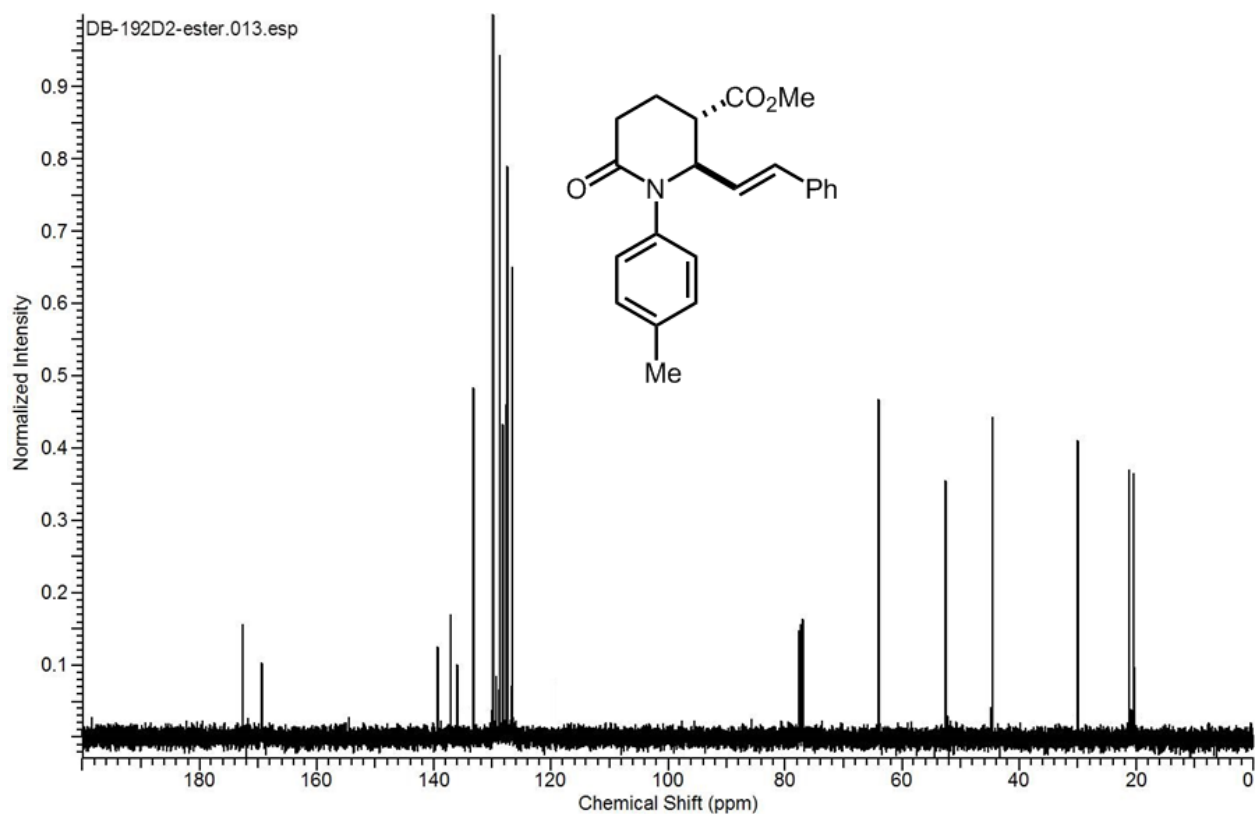

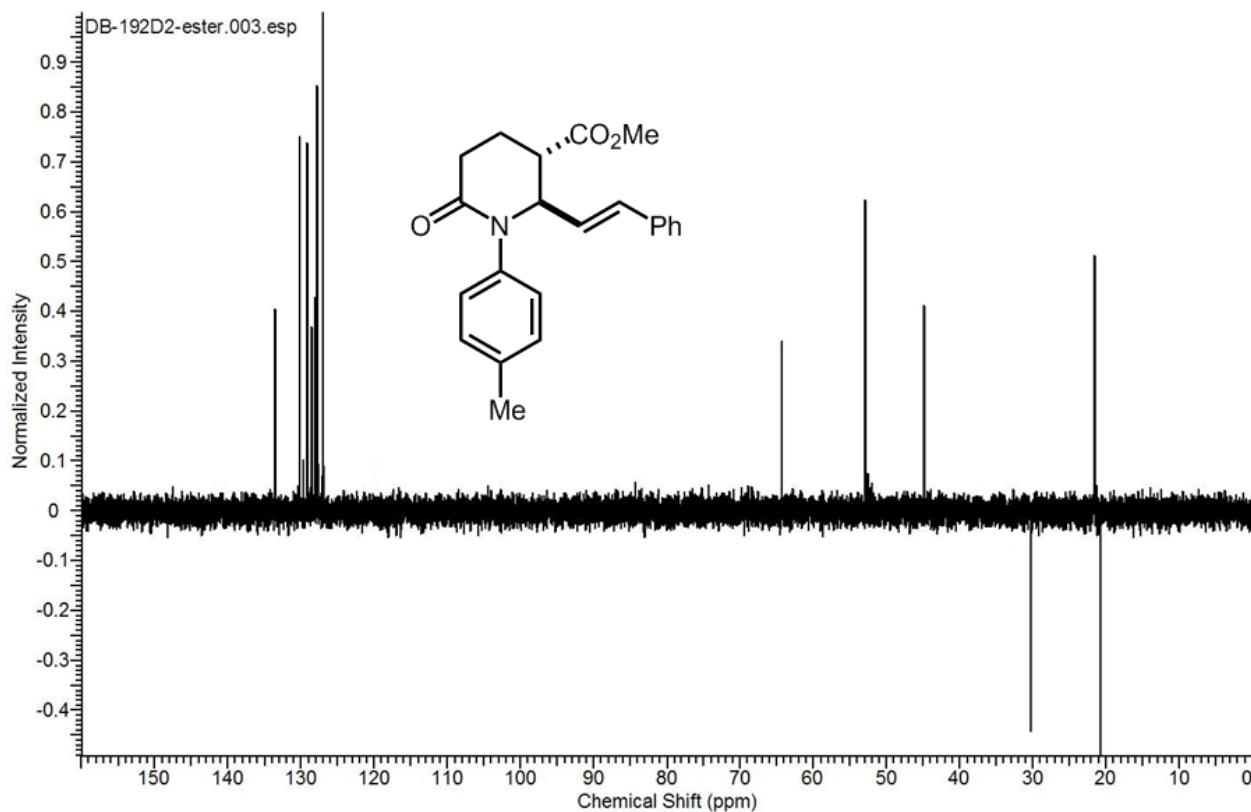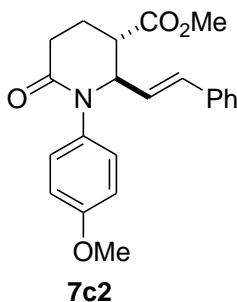

Prepared from imine **4b** (237 mg, 1.0 mmol) and glutaric anhydride (114 mg, 1.0 equiv), using General Procedures B and C. T = 105 °C, time = 18 h. Purification: Flash chromatography on silica eluting with hexane/EtOAc (50:50 to 0:100) then 100% MeOH. Yield = 307 mg, 84% over 2 steps, 95:5 dr.  $^1\text{H}$  NMR (400 MHz,  $\text{CDCl}_3$ )  $\delta$  7.37 to 7.15 (7H, m), 6.87 (2H, d), 6.38 to 6.31 (1H, d), 6.13 to 6.09 (1H, dd), 4.69 to 4.67 (1H, dd), 3.77 to 3.72 (6H, ss), 2.89 to 2.72 (1H, t), 2.65 to 2.56 (2H, m), 2.39 to 2.23 (2H, m).  $^{13}\text{C}$  NMR (101 MHz,  $\text{CDCl}_3$ )  $\delta$  172.9, 169.5, 158.4, 135.9, 134.9, 134.7, 133.2, 129.3, 128.8, 128.7, 128.7, 128.3, 128.2, 127.6, 126.7, 126.6, 124.5, 114.4, 64.1, 55.4, 52.4, 44.4, 29.9, 20.2. **HRMS- $\text{EI}^+$**  ( $m/z$ ): calc'd for  $\text{C}_{22}\text{H}_{23}\text{NO}_4$  365.1627; found 365.1633.

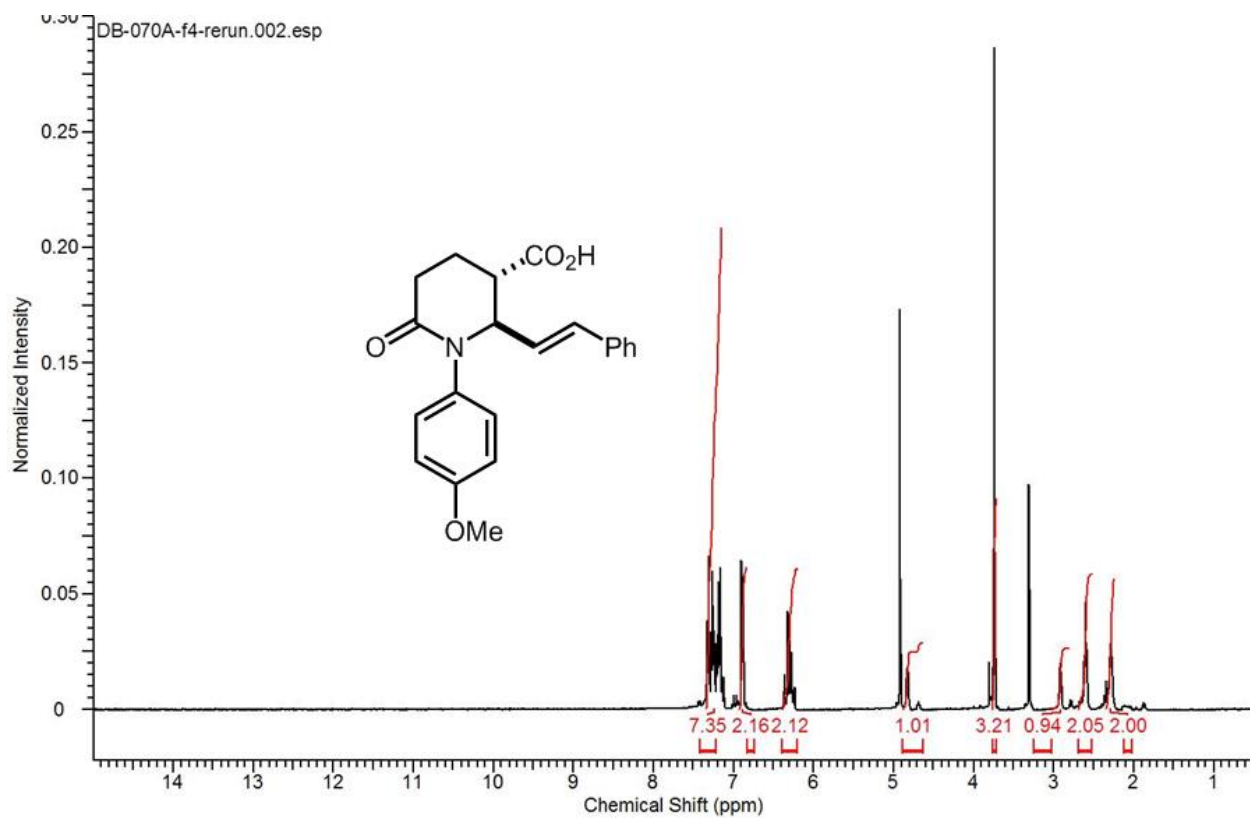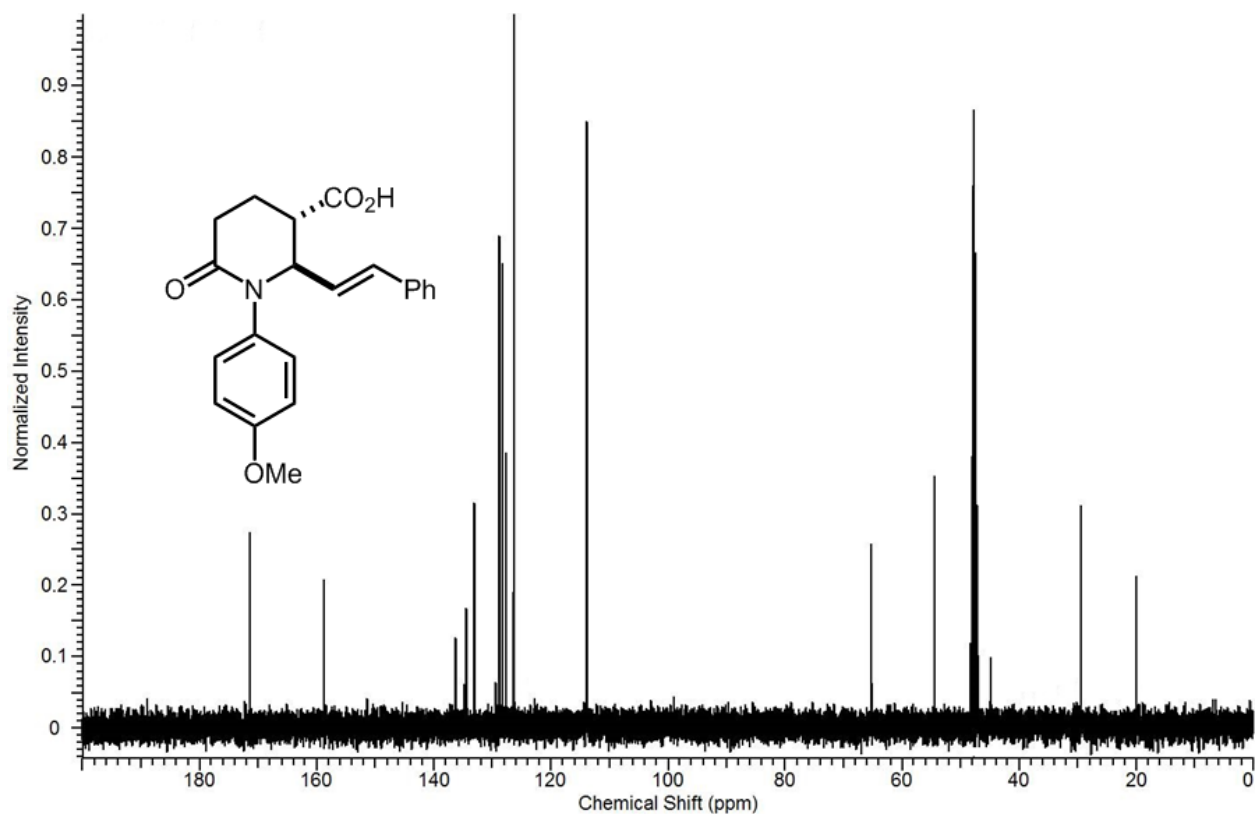

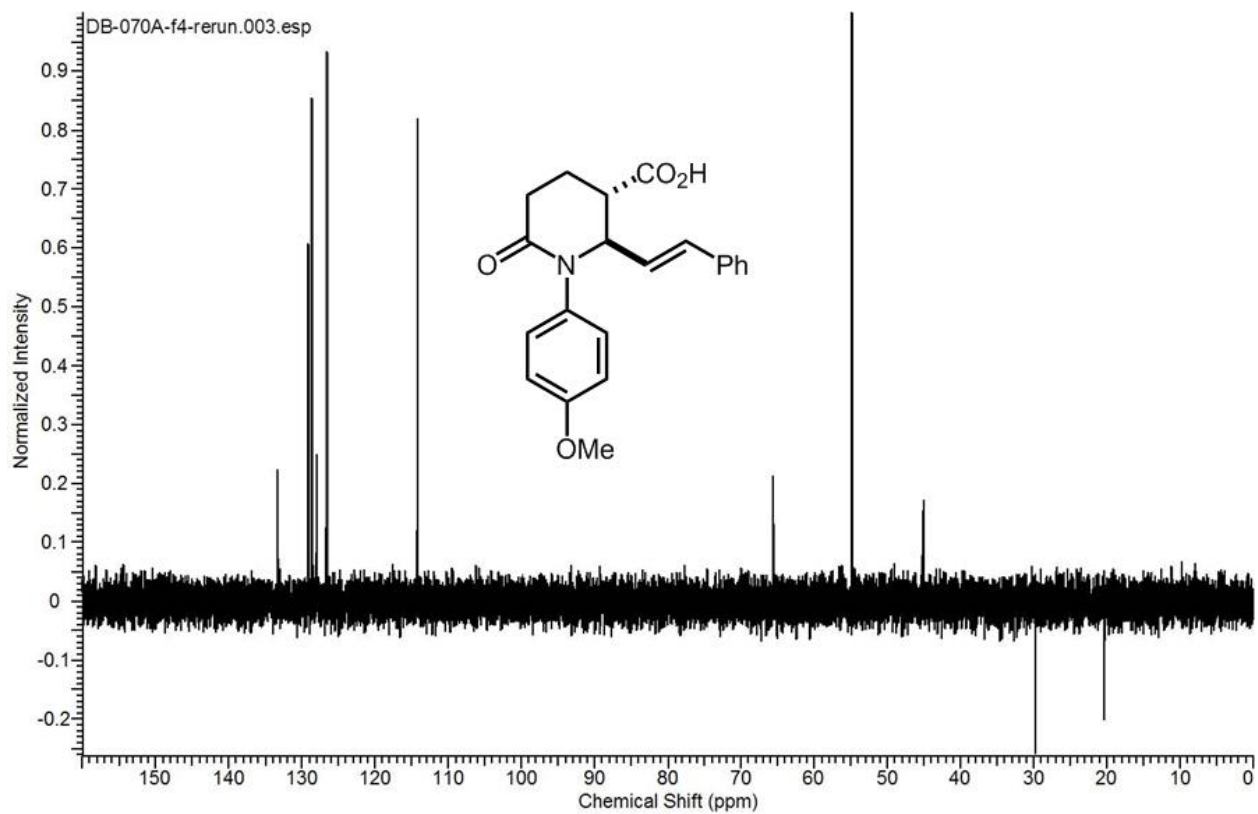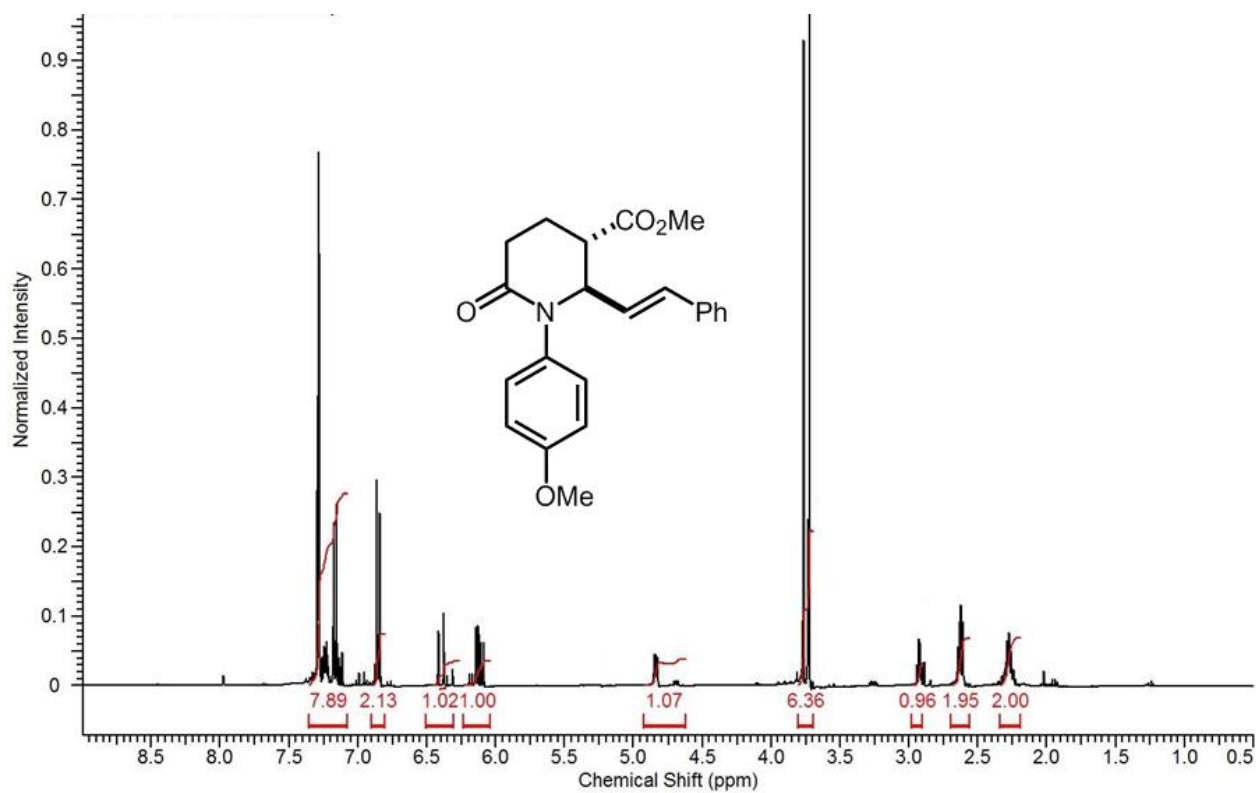

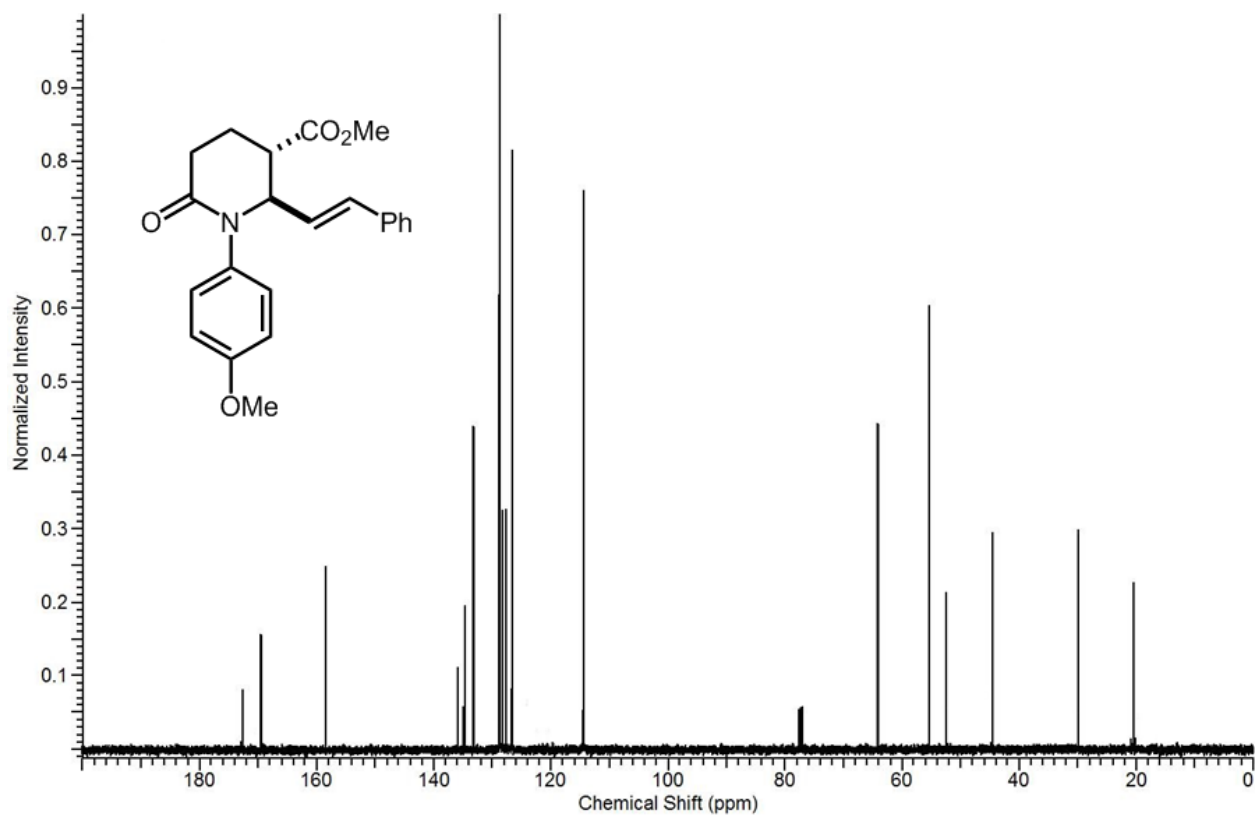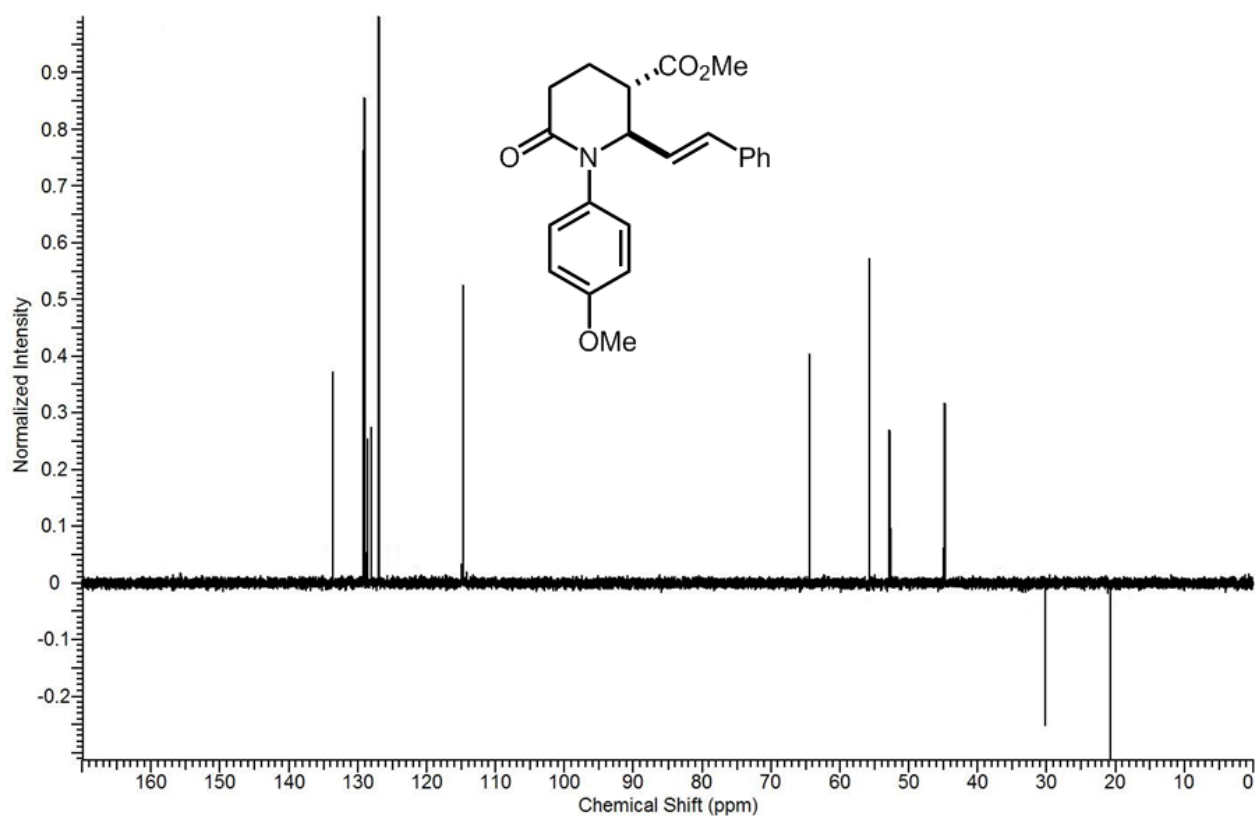



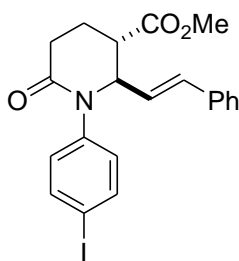**7d2**

Prepared from imine **4d** (333 mg, 1.0 mmol) and glutaric anhydride (114 mg, 1.0 equiv), using General Procedures B and C. T = 105 °C, time = 22 h. Purification: Flash chromatography on silica eluting with hexane/EtOAc (50:50 to 0:100). Yield = 346 mg, 75% over 2 steps, 95:5 dr.

$^1\text{H}$  NMR (400 MHz,  $\text{CDCl}_3$ )  $\delta$  7.77 (2H, d), 7.46 to 7.23 (5H, m), 7.04 (2H, d), 6.37 to 6.33 (1H, d), 6.16 to 6.08 (1H, dd), 4.88 to 4.85 (1H, dd), 3.78 (3H, s), 2.95 to 2.93 (1H, m), 2.69 to 2.61 (2H, m), 2.37 to 2.24 (2H, m).  $^{13}\text{C}$  NMR (101 MHz,  $\text{CDCl}_3$ )  $\delta$  172.4, 169.2, 141.7, 138.5, 138.3, 138.3, 137.7, 135.6, 135.1, 133.5, 131.3, 130.4, 129.7, 129.4, 129.2, 128.8, 128.5, 128.5, 128.4, 127.1, 126.7, 126.6, 124.1, 123.9, 92.5, 63.7, 52.3, 44.7, 29.8, 20.6. **HRMS- $\text{EI}^+$**  ( $m/z$ ): calc'd for  $\text{C}_{21}\text{H}_{20}\text{INO}_3$  461.0488; found 461.0492.

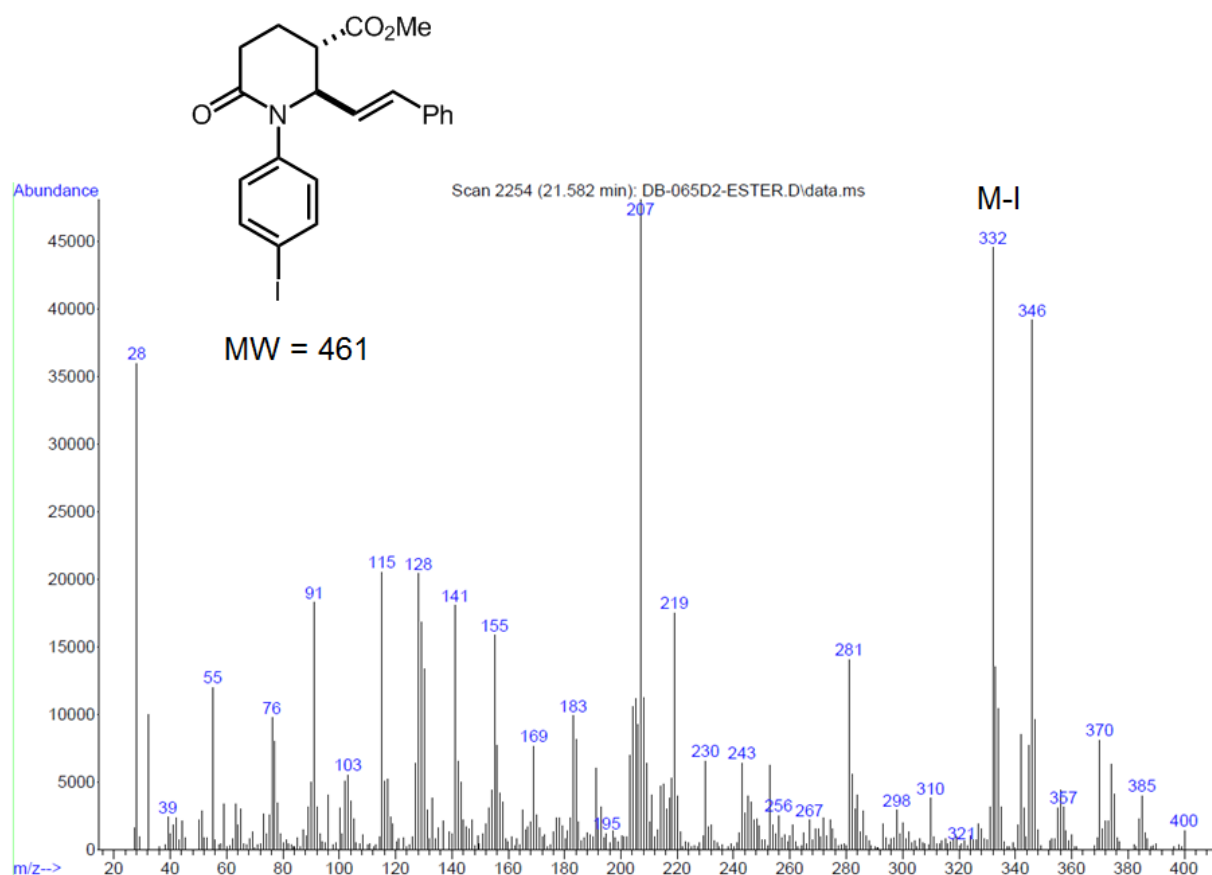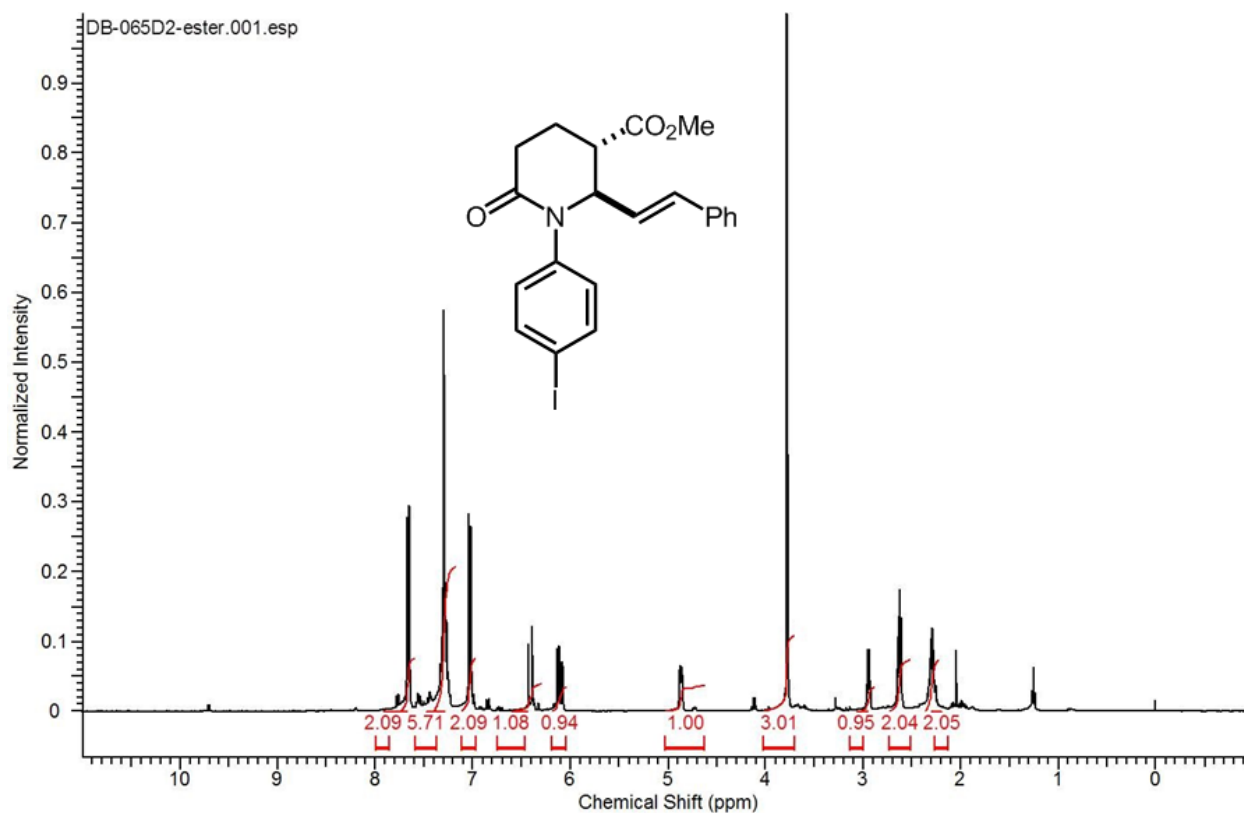

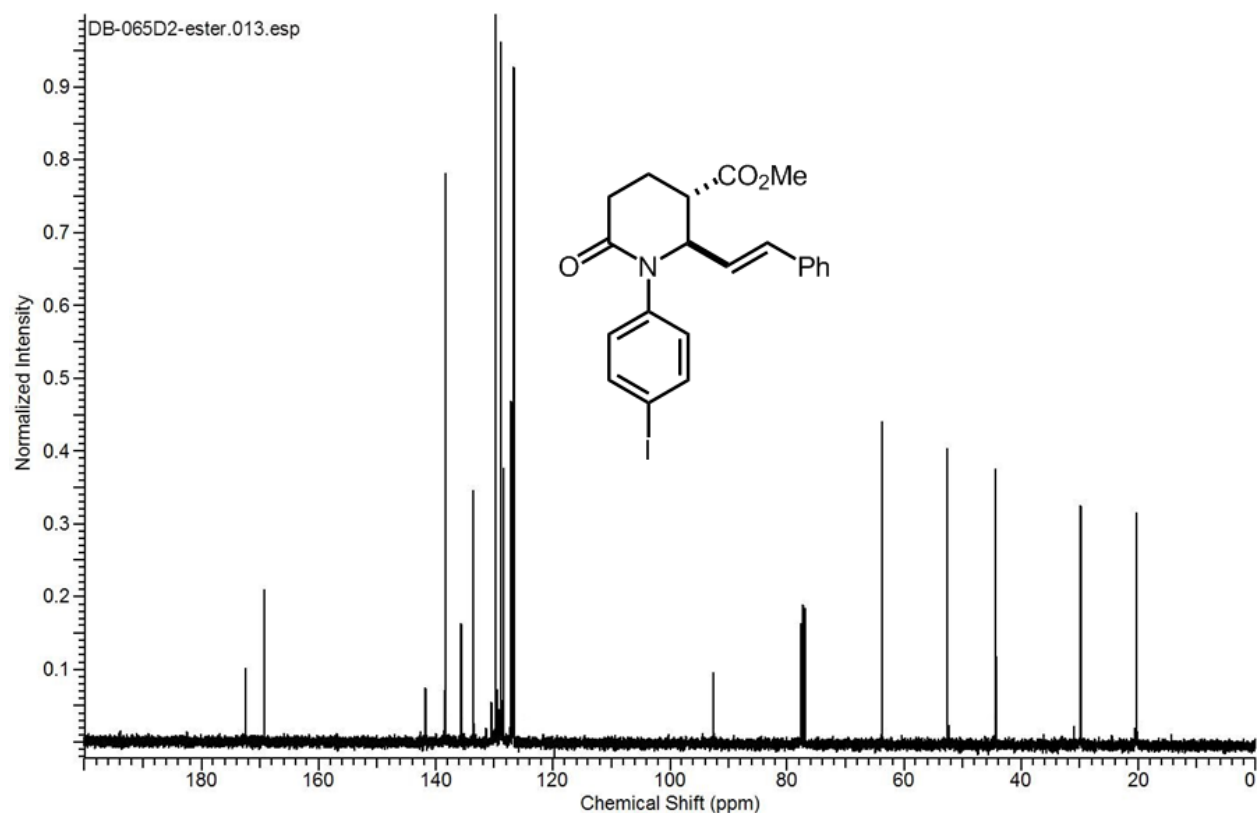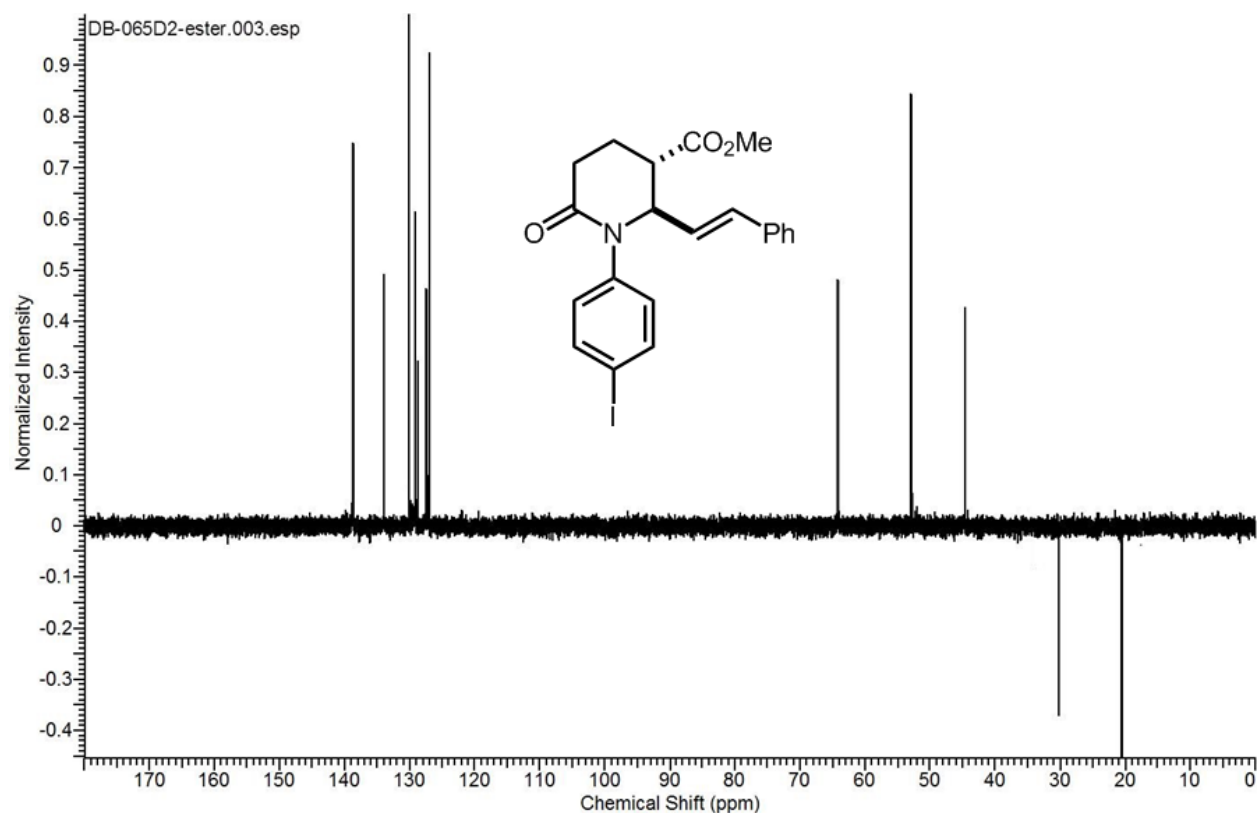

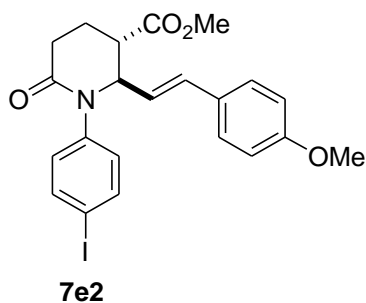

Prepared from imine **4g** (363 mg, 1.0 mmol) and glutaric anhydride (114 mg, 1.0 equiv), using General Procedures B and C. T = 105 °C, time = 22 h. Purification: Flash chromatography on silica eluting with hexane/EtOAc (50:50 to 0:100). Yield = 339 mg, 69% over 2 steps, 95:5 dr.

$^1\text{H}$  NMR (400 MHz,  $\text{CDCl}_3$ )  $\delta$  7.71 (2H, d), 7.28 to 7.16 (3H, m), 7.04 to 6.98 (2H, m), 6.81 (2H, d), 6.27 (1H, d), 5.95 to 5.91 (1H, dd), 4.82 to 4.79 (1H, dd), 3.78 to 3.74 (6H, s,s), 2.93 to 2.90 (1H, m), 2.61 to 2.57 (2H, m), 2.38 to 2.24 (2H, m).  $^{13}\text{C}$  NMR (101 MHz,  $\text{CDCl}_3$ )  $\delta$  173.4, 169.2, 159.8, 141.7, 138.2, 137.7, 133.0, 129.7, 129.4, 128.3, 127.8, 127.4, 124.7, 114.16, 92.5, 63.9, 55.41, 52.5, 44.4, 32.3, 20.1. **HRMS- $\text{EI}^+$**  ( $m/z$ ): calc'd for  $\text{C}_{22}\text{H}_{22}\text{INO}_4$  491.0594; found 491.0590.

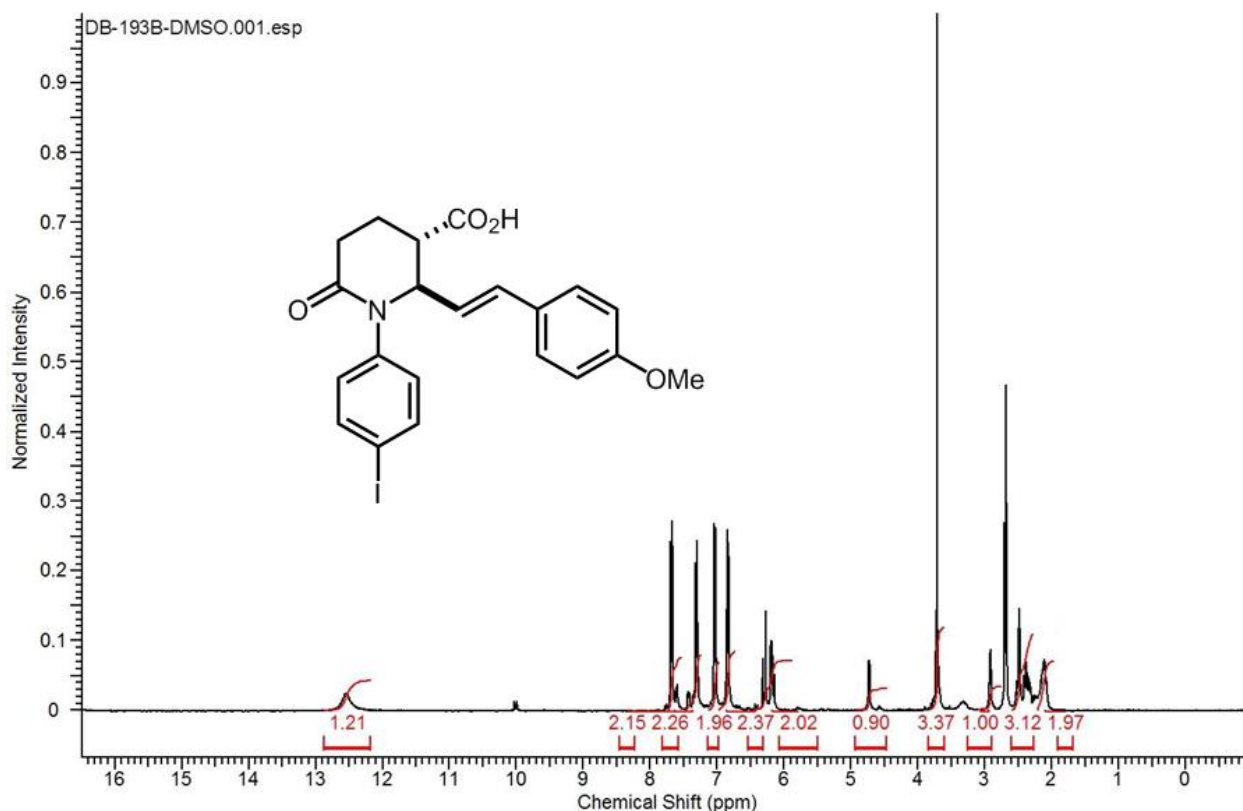

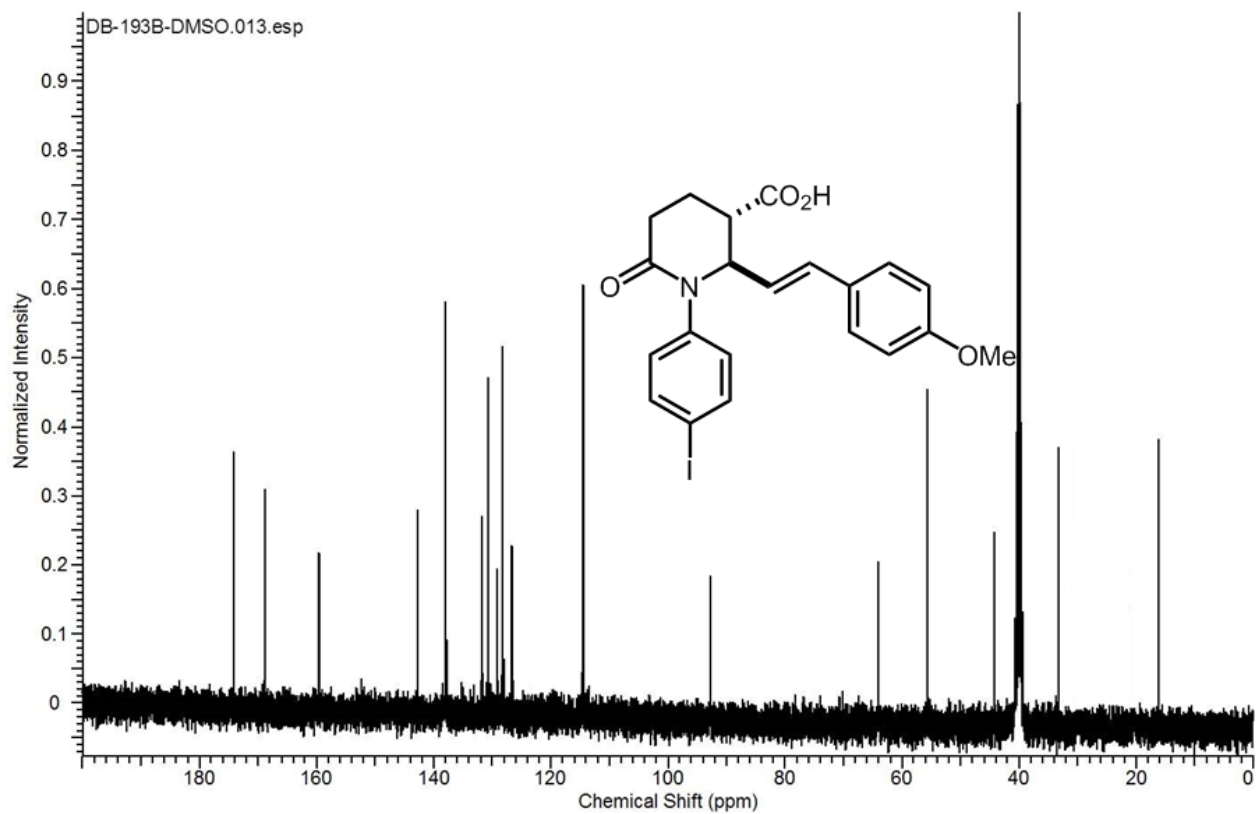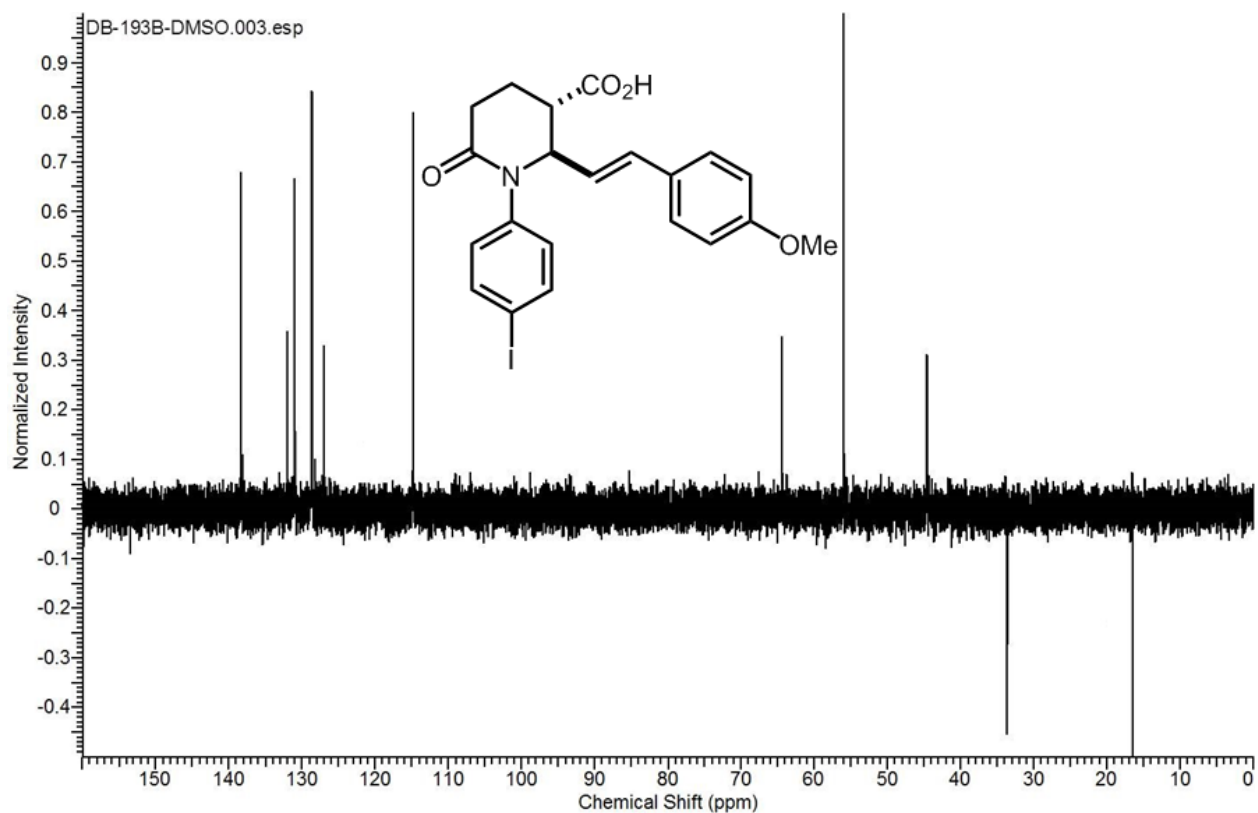

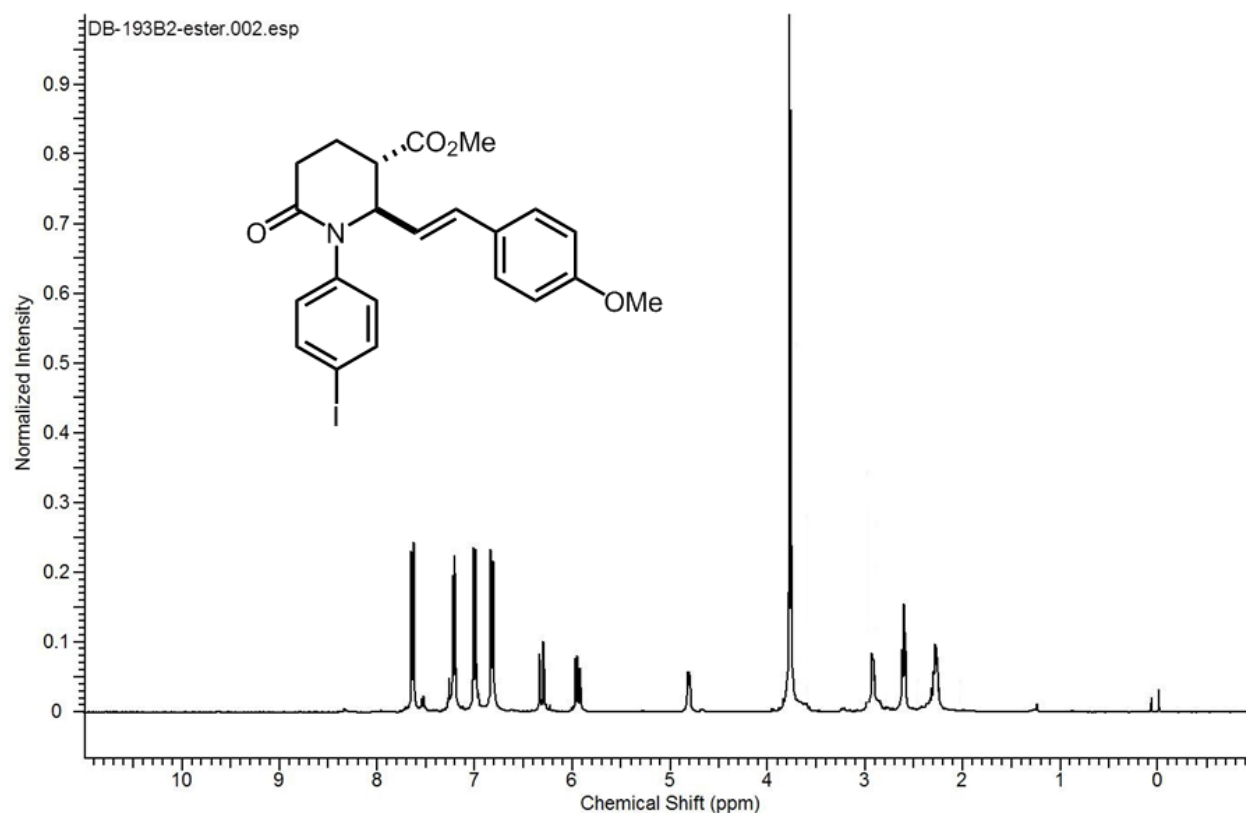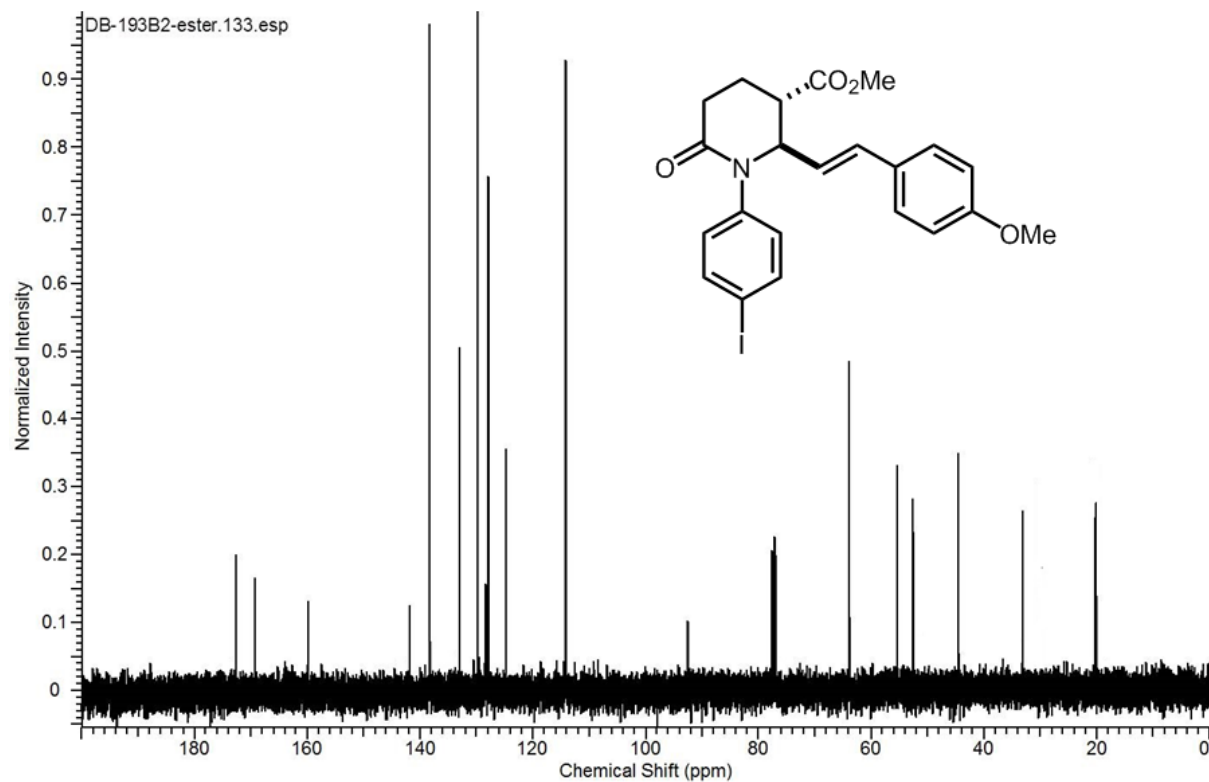

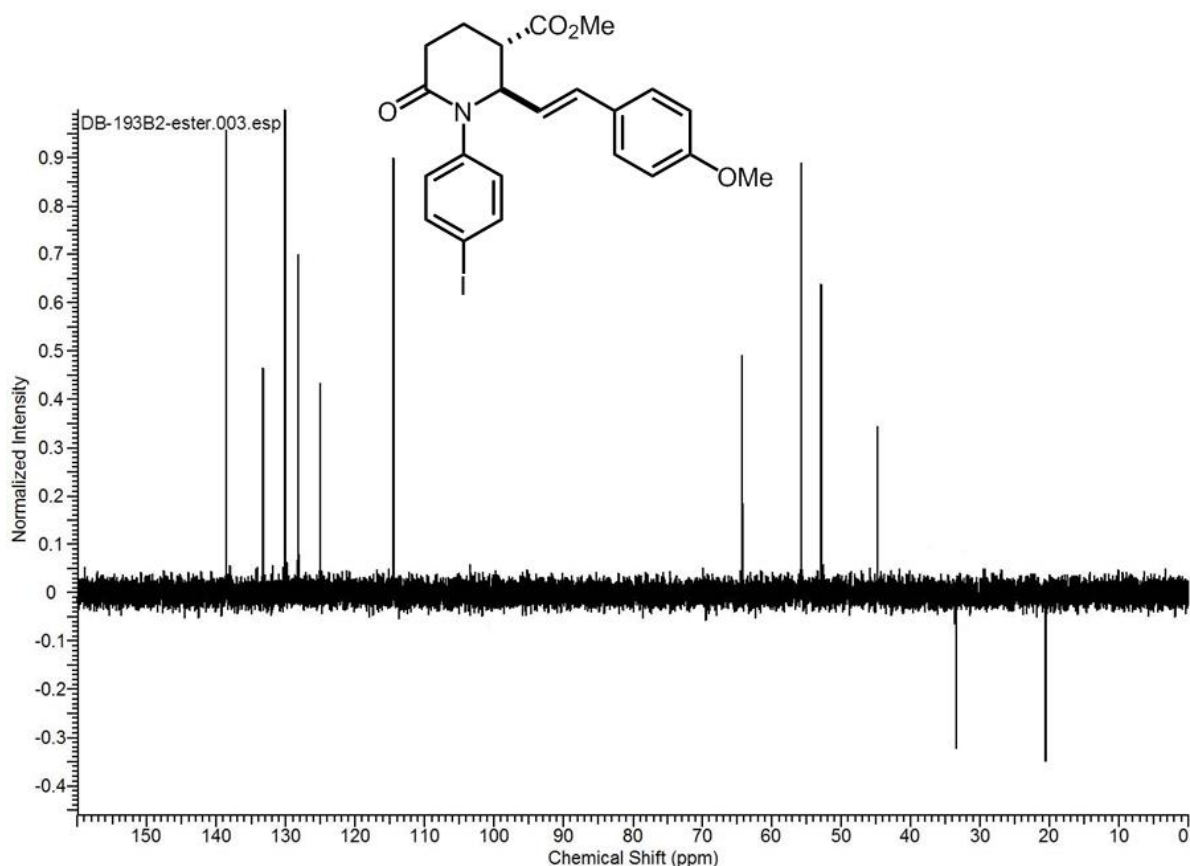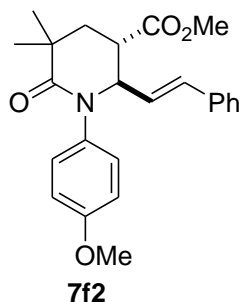

Prepared from imine **4b** (337 mg, 1.0 mmol) and 2,2-dimethyl glutaric anhydride (142 mg, 1.0 equiv), using General Procedures B and C. T = 110 °C, time = 26 h. Purification: Flash chromatography on silica eluting with hexane/EtOAc (50:50 to 0:100). Yield = 339 mg, 77% over 2 steps, 95:5 dr. <sup>1</sup>H NMR (400 MHz, CDCl<sub>3</sub>) δ 7.36 to 7.12 (7H, m), 6.84 to 6.81 (2H, d), 6.29 to 6.26 (1H, d), 5.91 to 5.87 (1H, dd), 4.75 to 4.70 (1H, t), 3.78 to 3.70 (6H, s,s), 3.03 to 2.98 (1H, m), 2.27 to 2.19 (1H, dd), 2.09 to 2.03 (1H, dd), 1.41 to 1.35 (6H, ss). <sup>13</sup>C NMR (101 MHz, CDCl<sub>3</sub>) δ 175.6, 173.2, 158.2, 136.0, 134.9, 134.3, 133.3, 129.3, 129.2, 128.7, 128.6, 128.2, 128.2, 128.1, 128.0, 126.6, 114.5, 64.7, 55.3, 52.1, 43.4, 38.4, 38.0, 28.4, 27.8. **HRMS-<sup>+</sup> (m/z)**: calc'd for C<sub>24</sub>H<sub>27</sub>NO<sub>4</sub> 393.1940; found 393.1944.

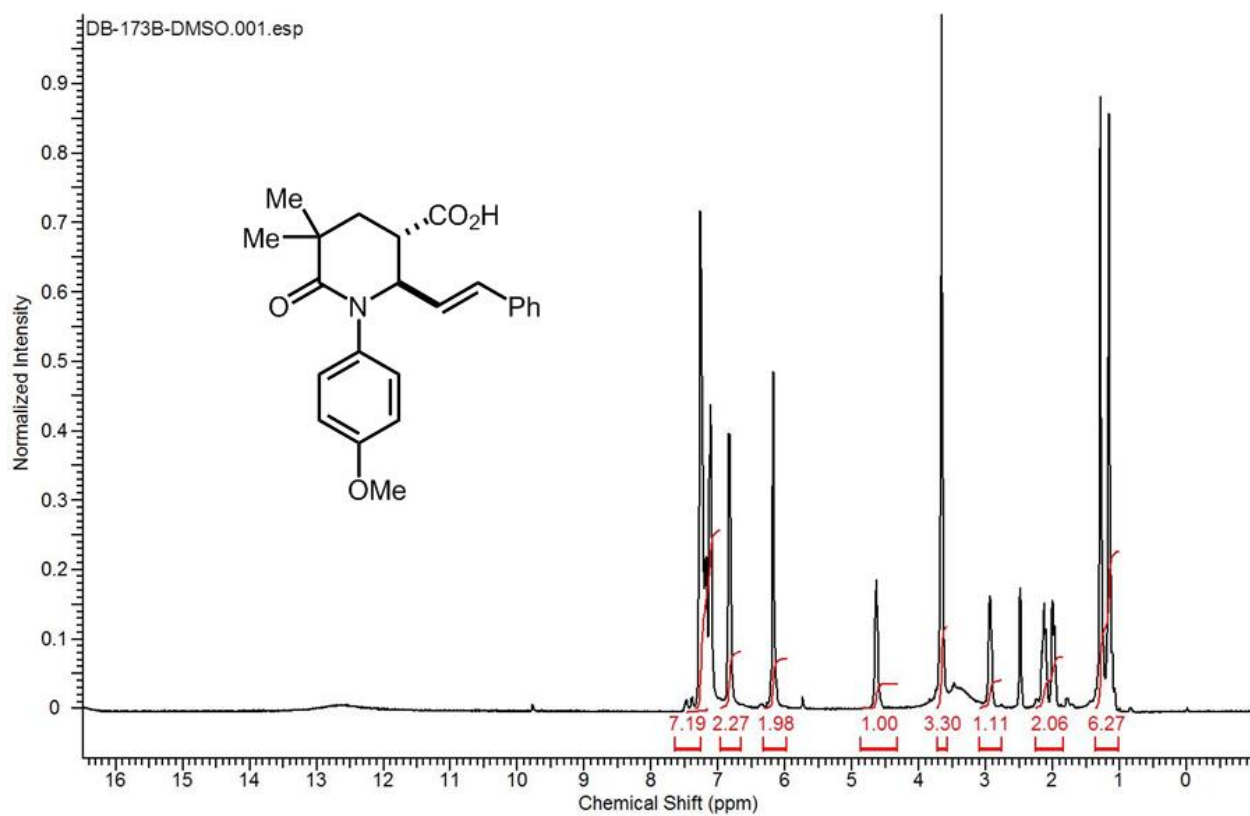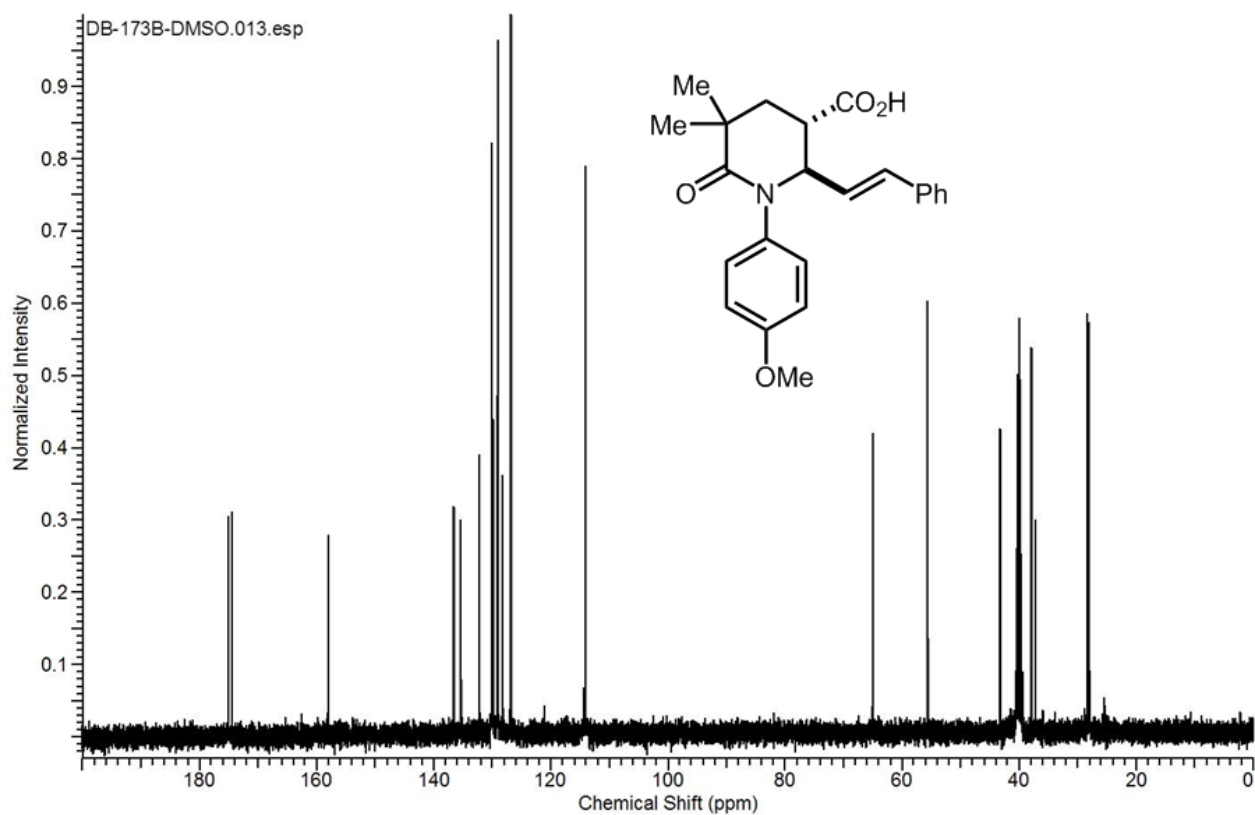



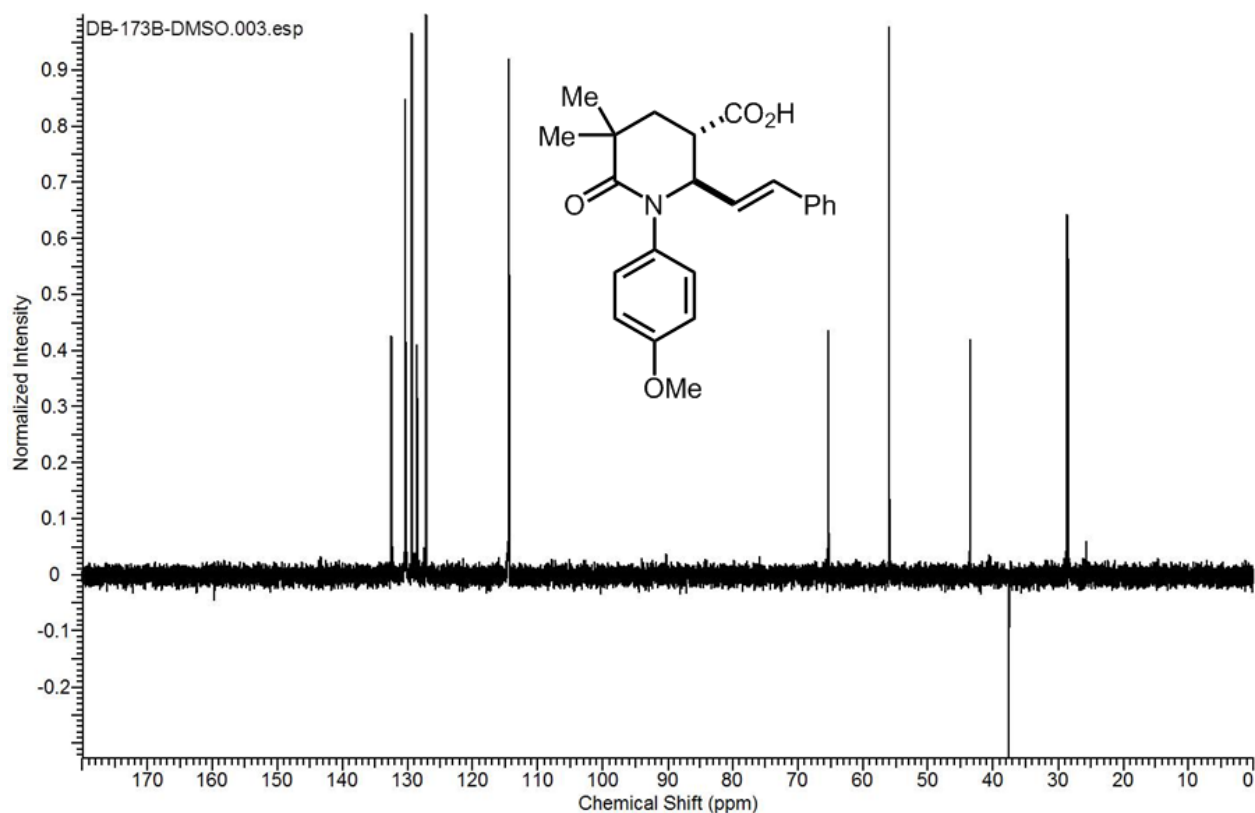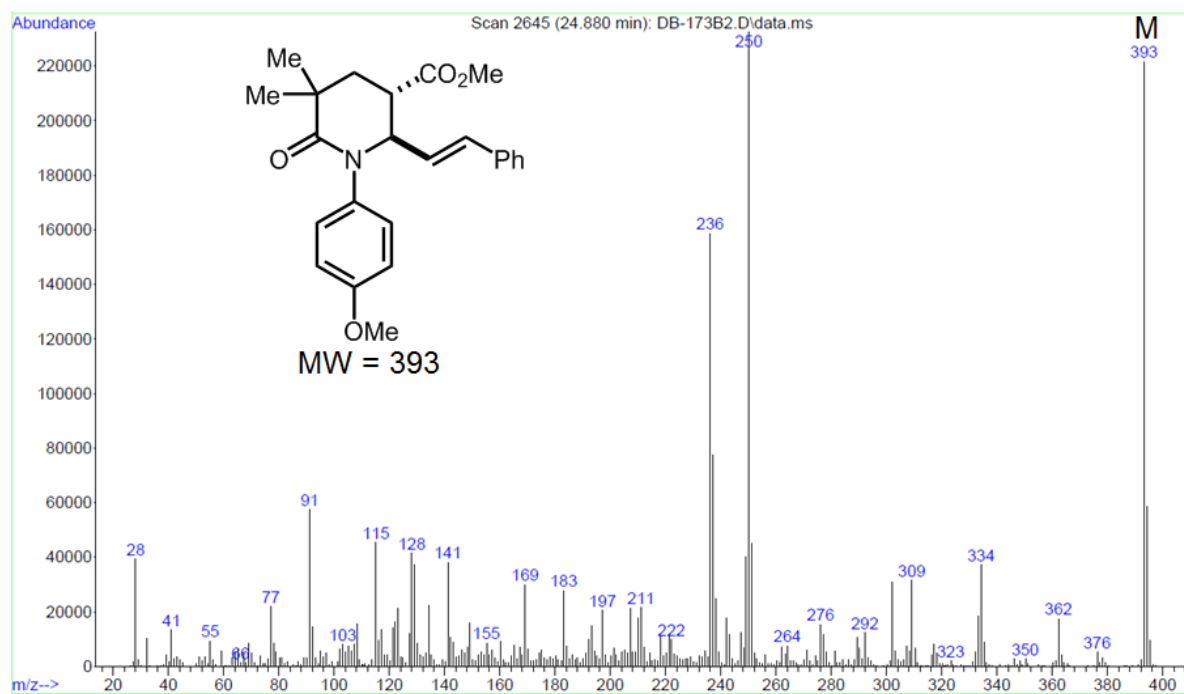

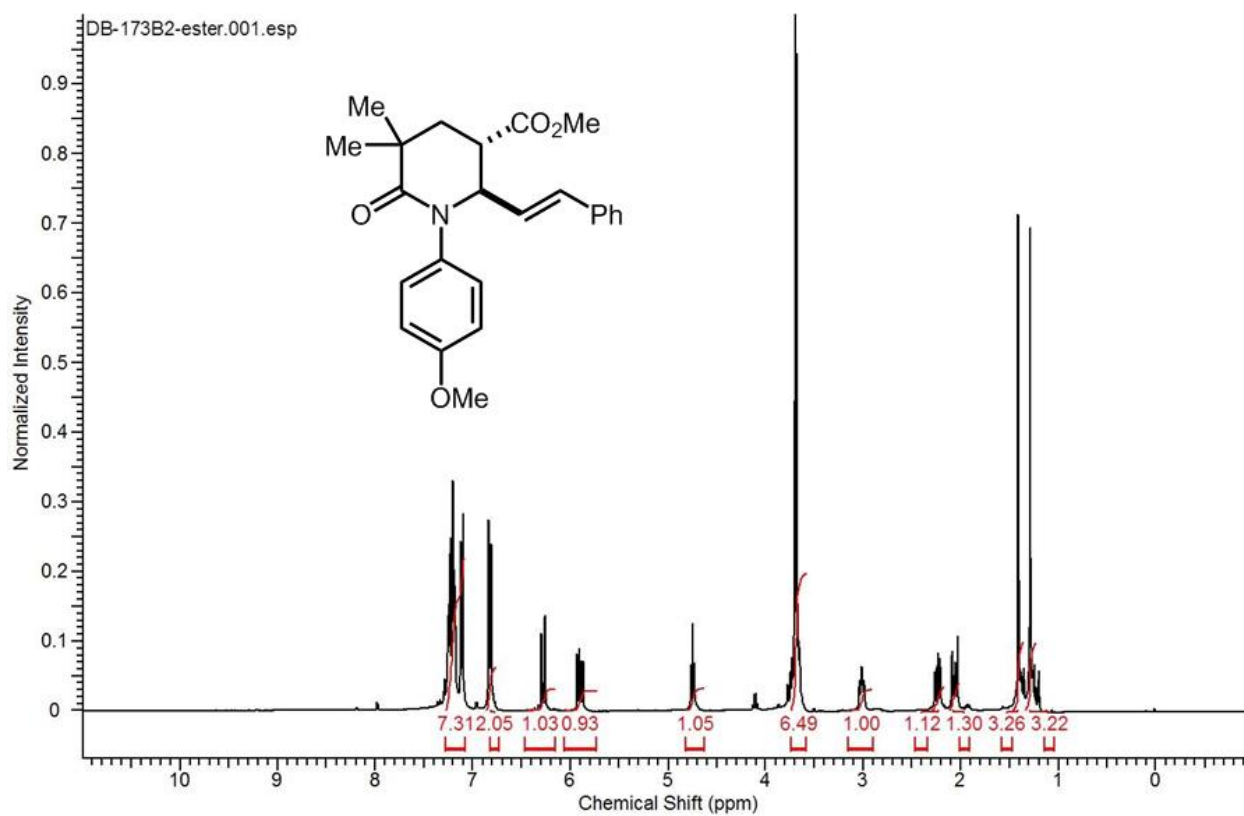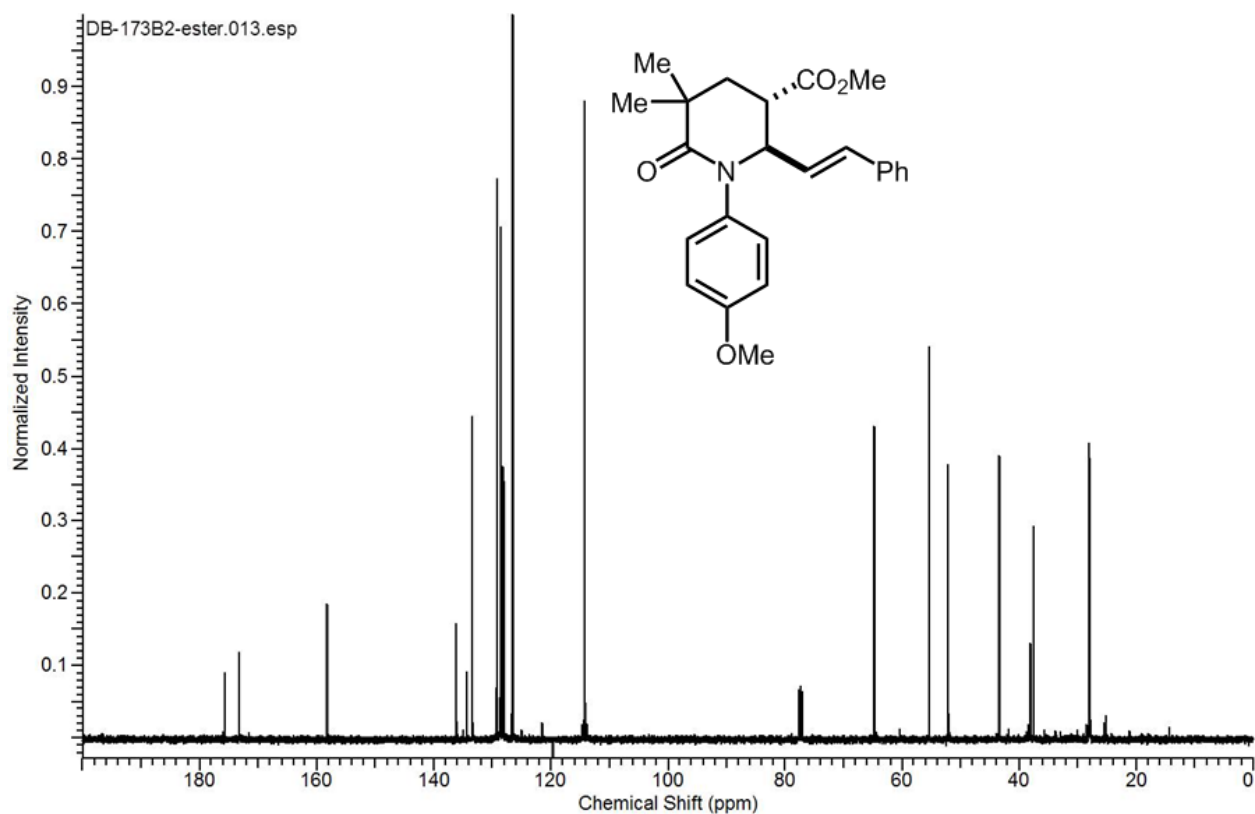

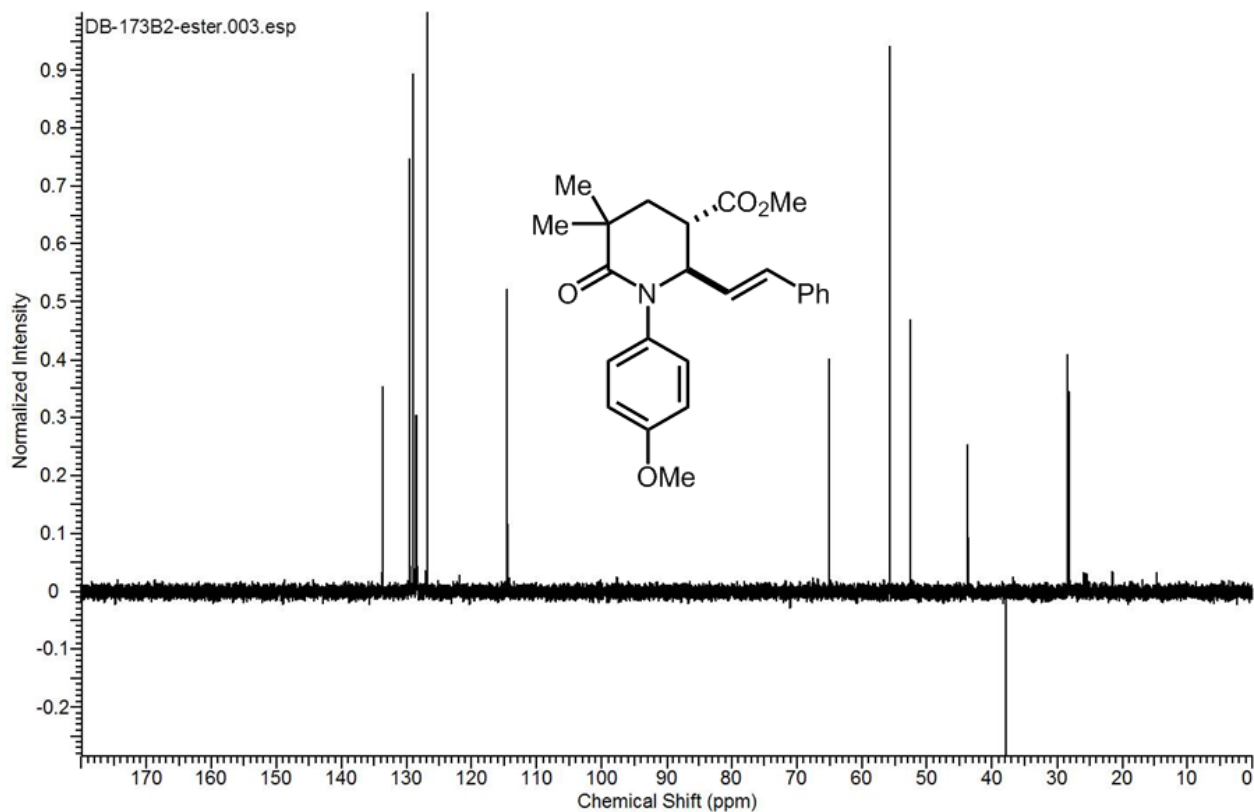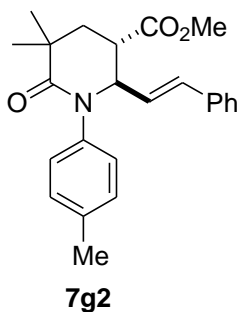

Prepared from imine **4c** (221 mg, 1.0 mmol) and 2,2-dimethyl glutaric anhydride (142 mg, 1.0 equiv), using General Procedures B and C. T = 110 °C, time = 26 h. Purification: Flash chromatography on silica eluting with hexane/EtOAc (50:50 to 0:100). Yield = 317 mg, 84% over 2 steps, 95:5 dr.  $^1\text{H}$  NMR (400 MHz,  $\text{CDCl}_3$ )  $\delta$  7.37 to 7.05 (9H, m), 6.29 to 6.25 (1H, d), 5.87 to 5.85 (1H, dd), 4.78 to 4.74 (1H, t), 3.77 (3H, s), 3.03 to 2.91 (1H, m), 2.36 to 2.26 (4H, m), 2.09 to 1.98 (1H, dd), 1.38 to 1.26 (6H, s,s).  $^{13}\text{C}$  NMR (101 MHz,  $\text{CDCl}_3$ )  $\delta$  175.5, 173.2, 138.8, 136.7, 136.1, 133.3, 129.6, 129.4, 129.1, 128.5, 128.2, 127.9, 127.9, 127.2, 126.6, 126.5, 64.5, 51.9, 43.5, 38.0, 37.5, 29.3, 27.8, 20.9. **HRMS- $\text{EI}^+$**  ( $m/z$ ): calc'd for  $\text{C}_{24}\text{H}_{27}\text{NO}_3$  377.1991; found 377.1995.

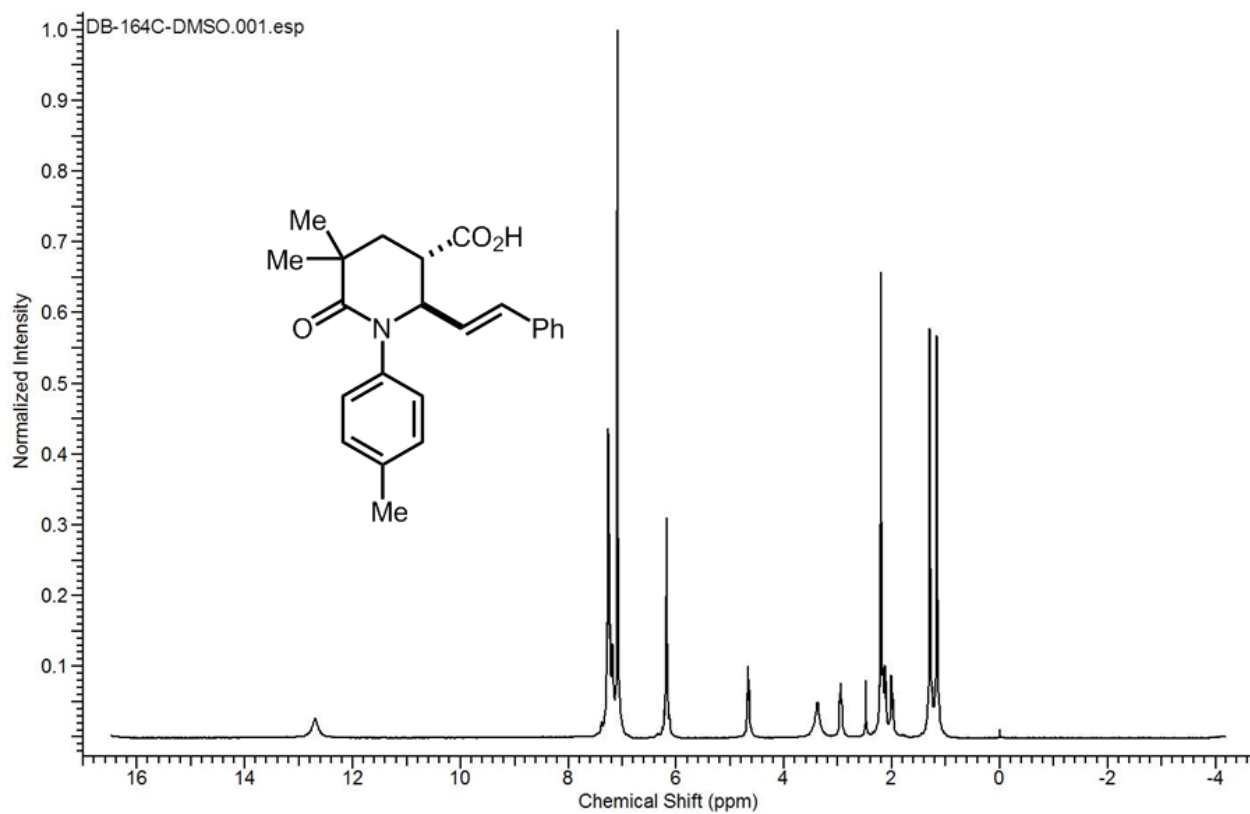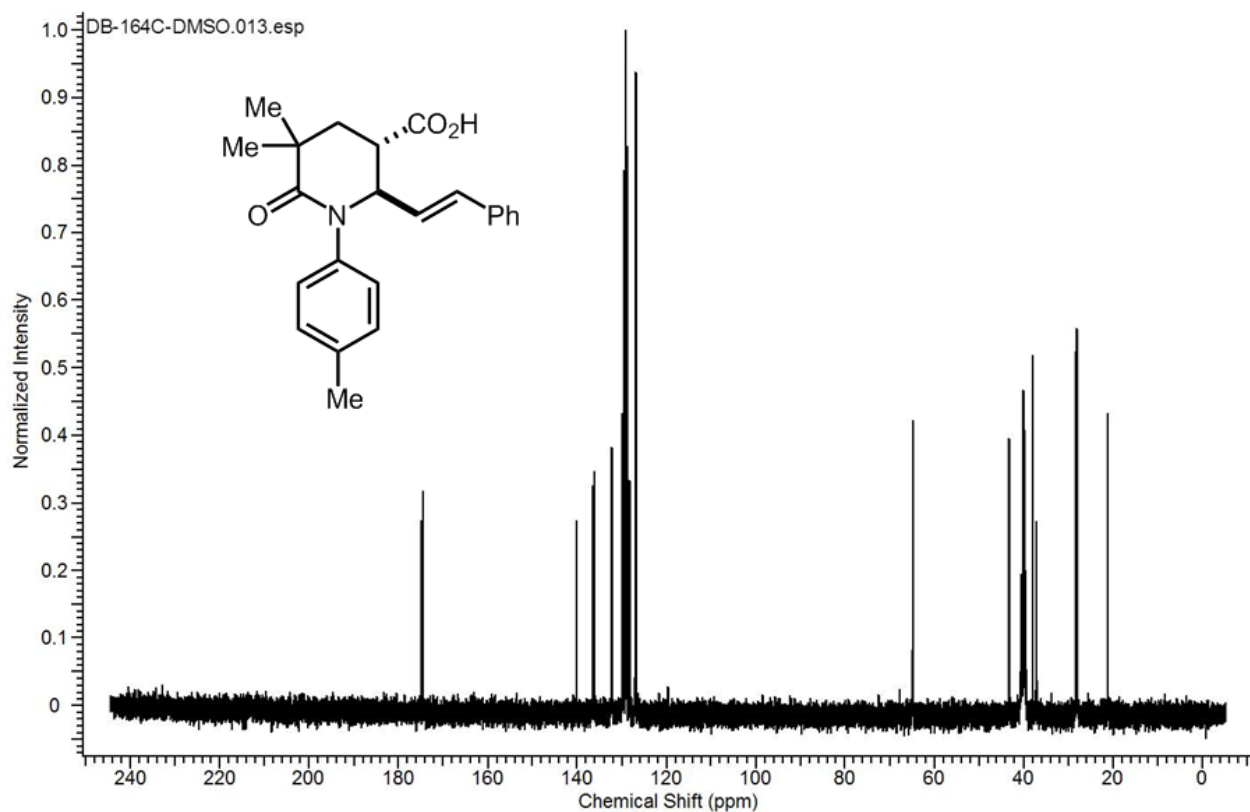

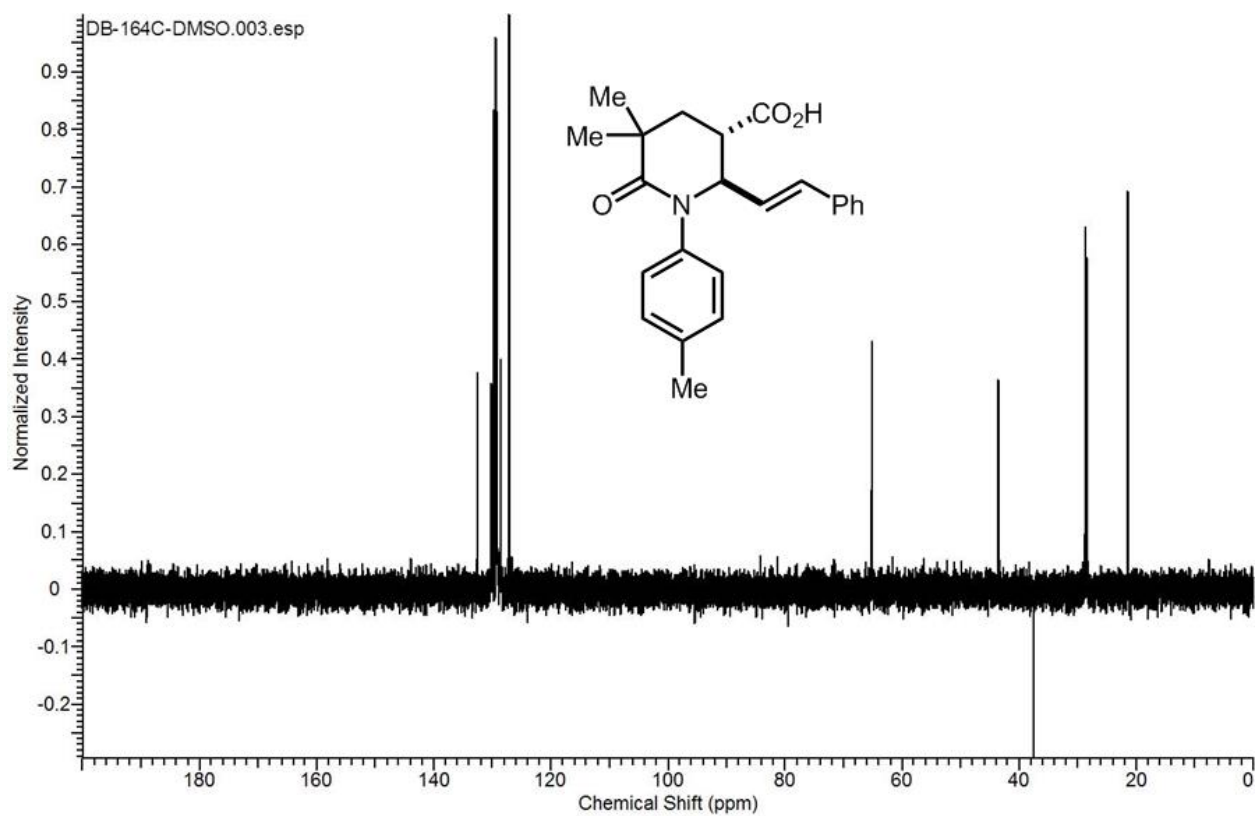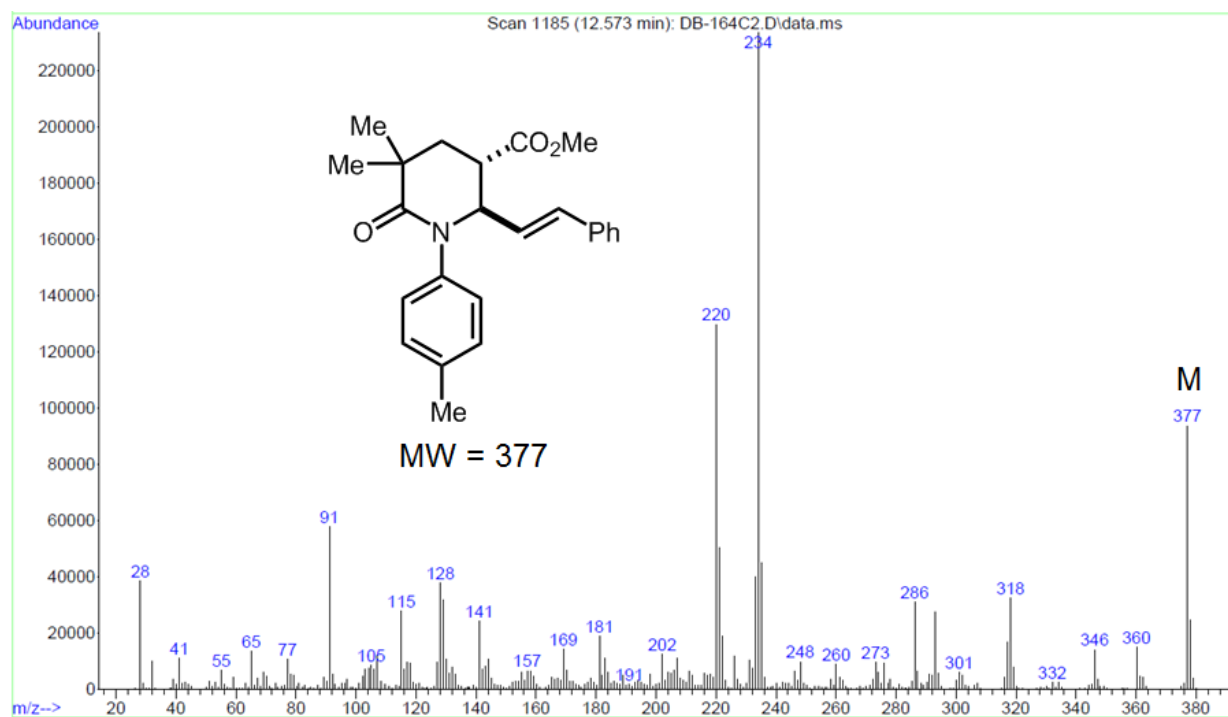

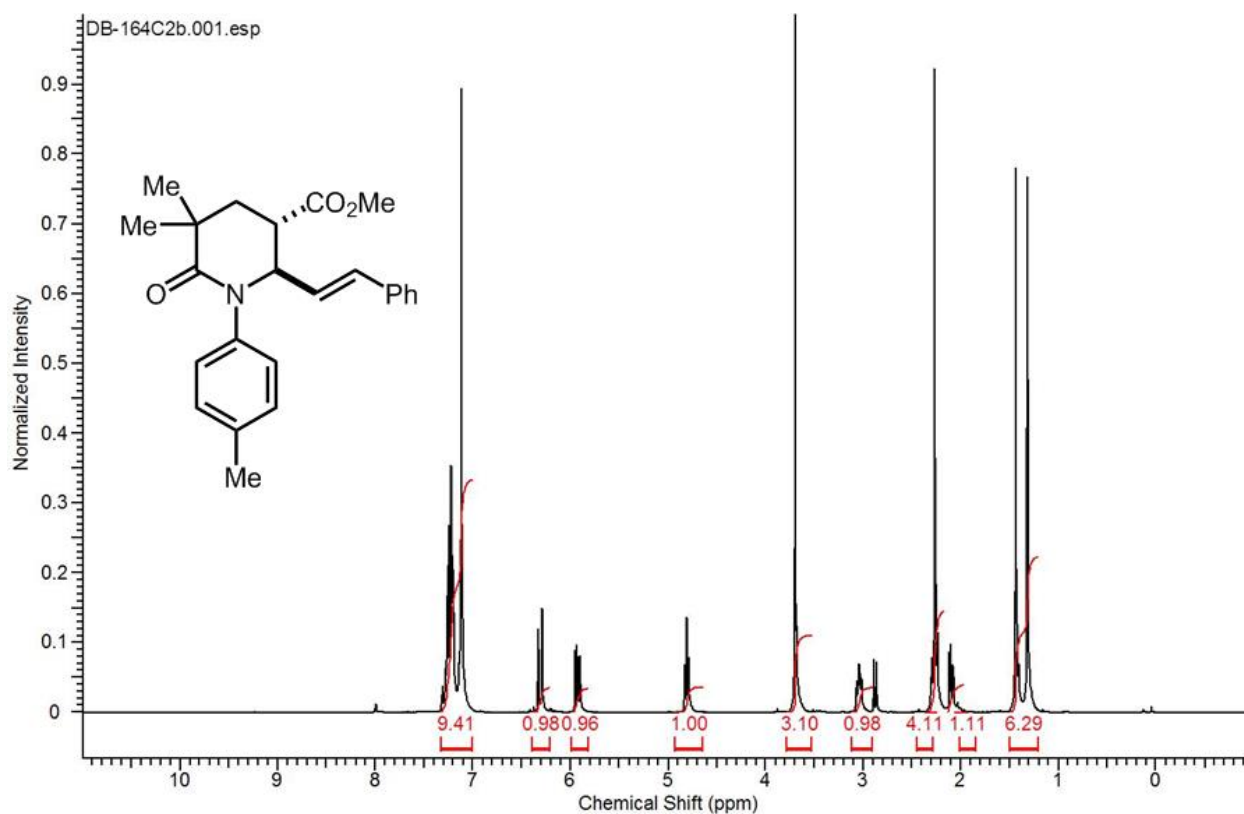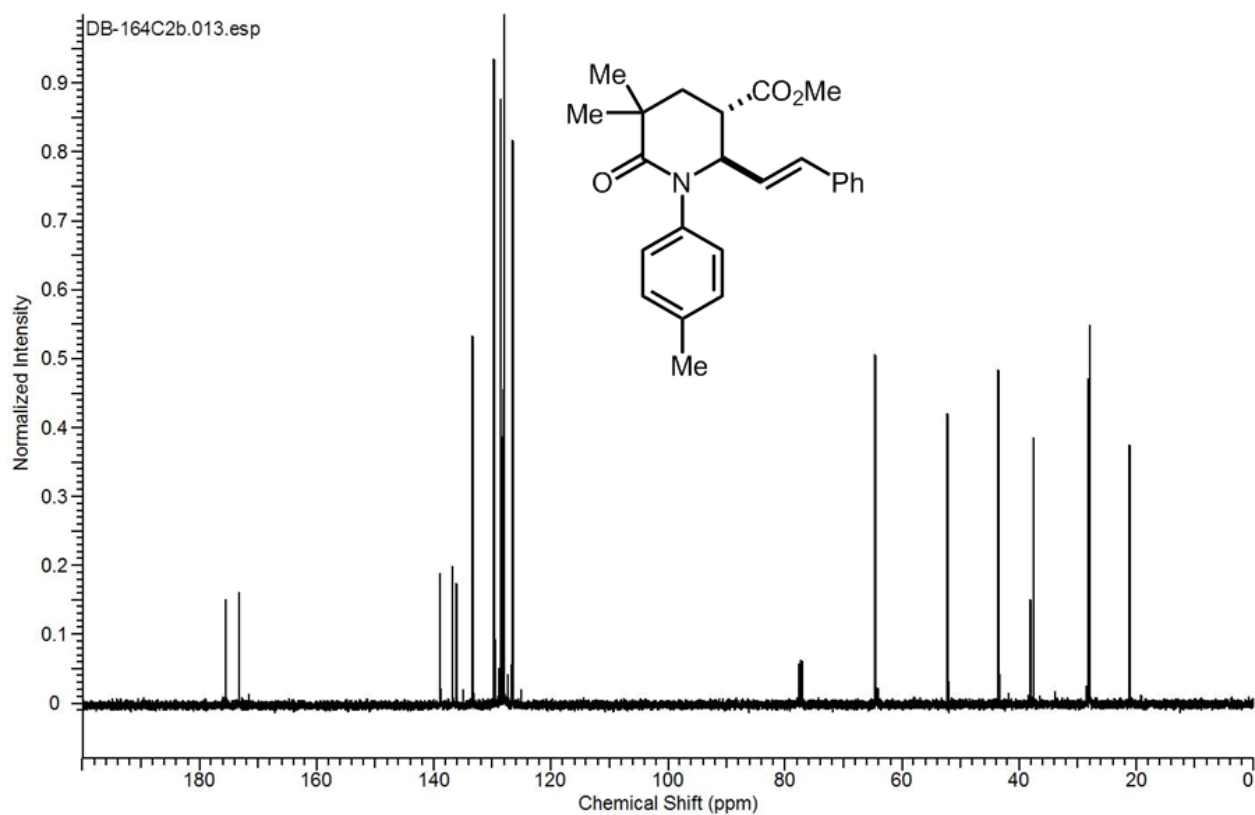

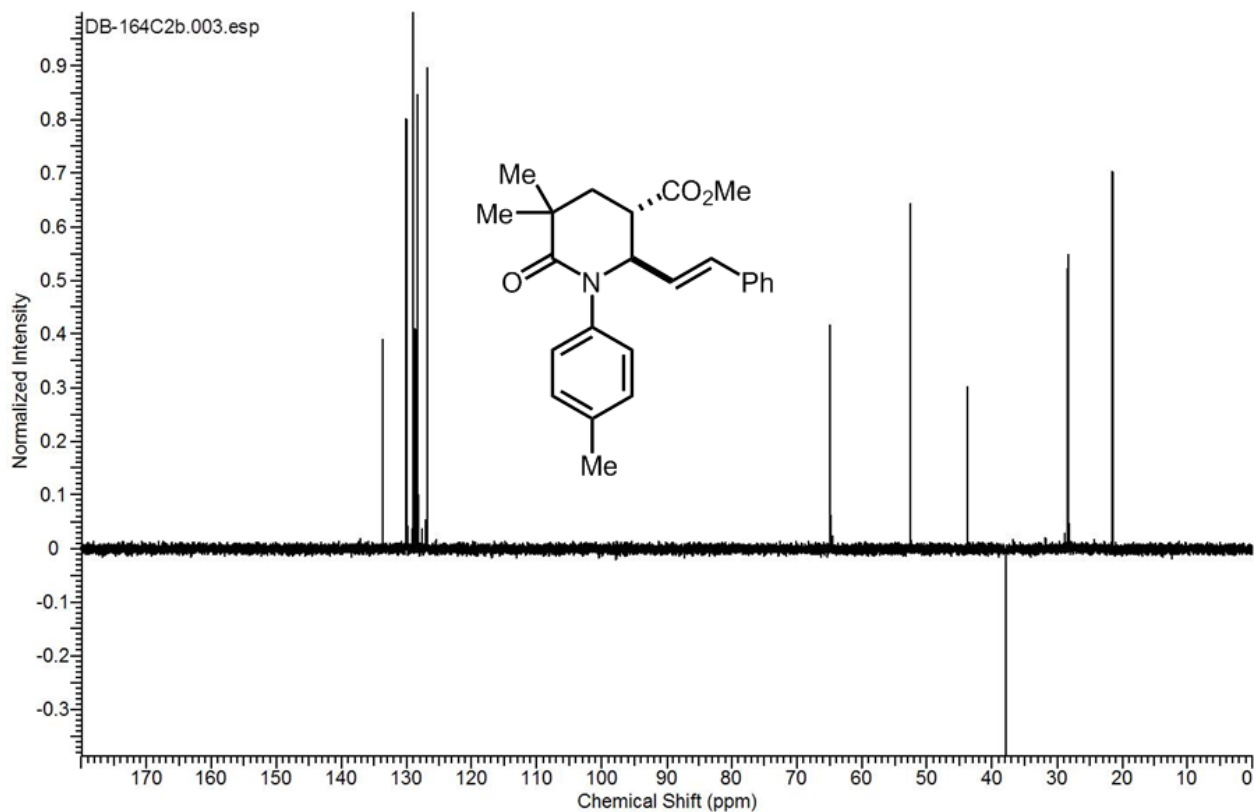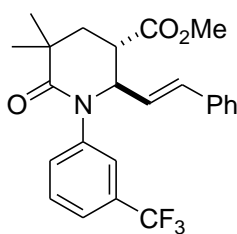**7h2**

Prepared from imine **4e** (275 mg, 1.0 mmol) and 2,2-dimethyl glutaric anhydride (142 mg, 1.0 equiv), using General Procedures B and C. T = 110 °C, time = 36 h. Purification: Flash chromatography on silica eluting with hexane/EtOAc (50:50 to 0:100). Yield = 302 mg, 70% over 2 steps, 96:4 dr.  $^1\text{H}$  NMR (400 MHz,  $\text{CDCl}_3$ )  $\delta$  7.52 to 7.16 (9H, m), 6.33 (1H, d), 5.85 to 5.82 (1H, dd), 4.85 to 4.81 (1H, t), 3.70 (3H, s), 3.07 to 2.91 (1H, m), 2.27 to 2.22 (1H, dd), 2.09 to 2.01 (1H, dd), 1.46 (3H, s), 1.43 (3H, s).  $^{13}\text{C}$  NMR (101 MHz,  $\text{CDCl}_3$ )  $\delta$  175.6, 172.9, 142.0, 135.7, 134.3, 132.0, 131.4, 131.1, 129.4, 128.7, 128.6, 128.2, 127.4, 126.6, 126.4, 125.3, 125.2, 125.2, 124.4, 64.6, 52.2, 43.3, 38.2, 37.4, 27.9, 27.3. **HRMS- $\text{EI}^+$**  ( $m/z$ ): calc'd for  $\text{C}_{24}\text{H}_{24}\text{F}_3\text{NO}_3$  431.1708; found 431.1700.

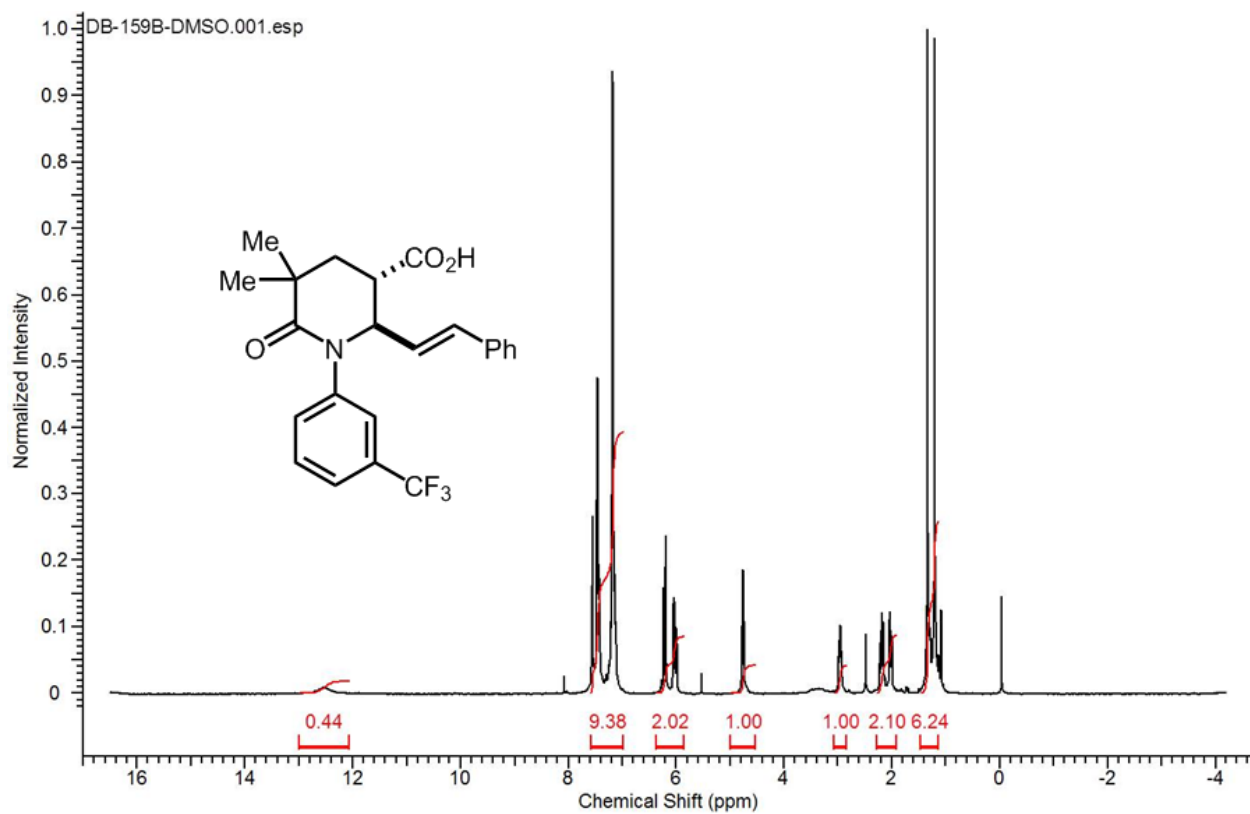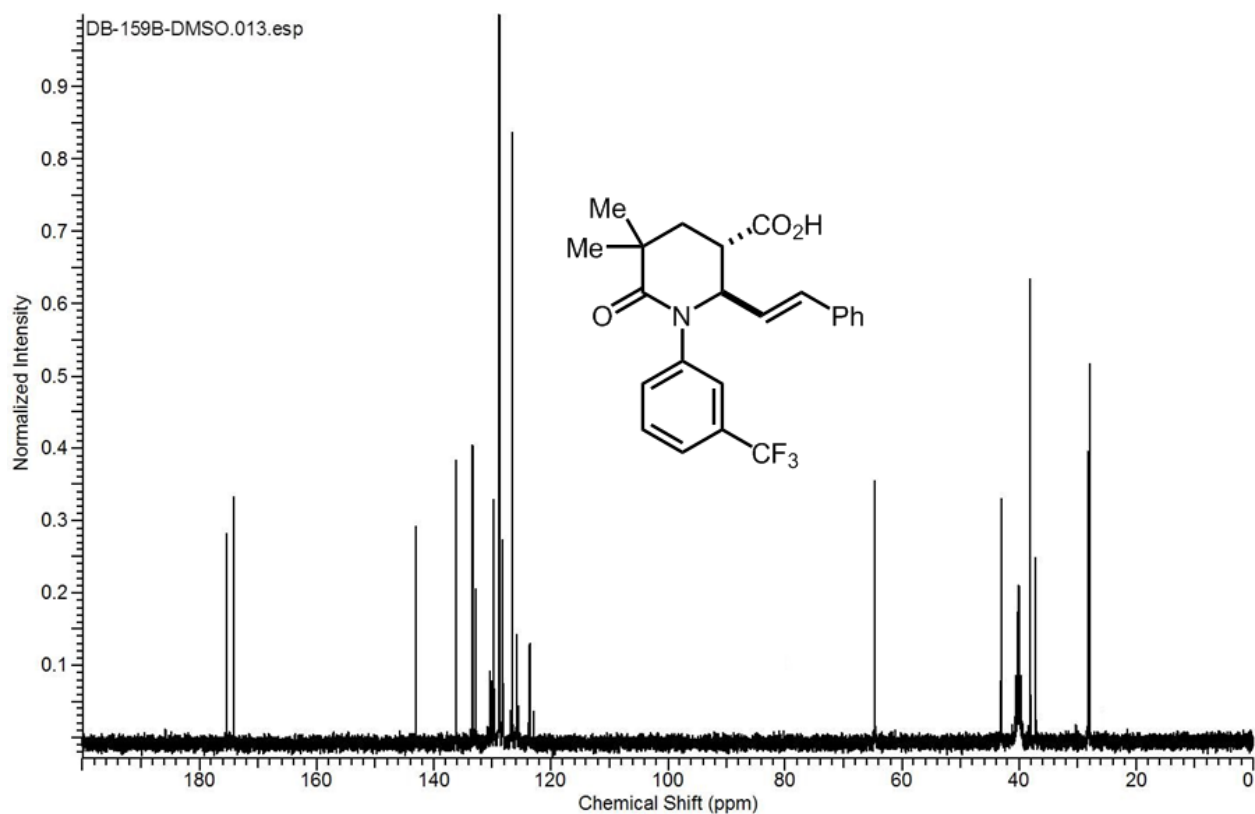



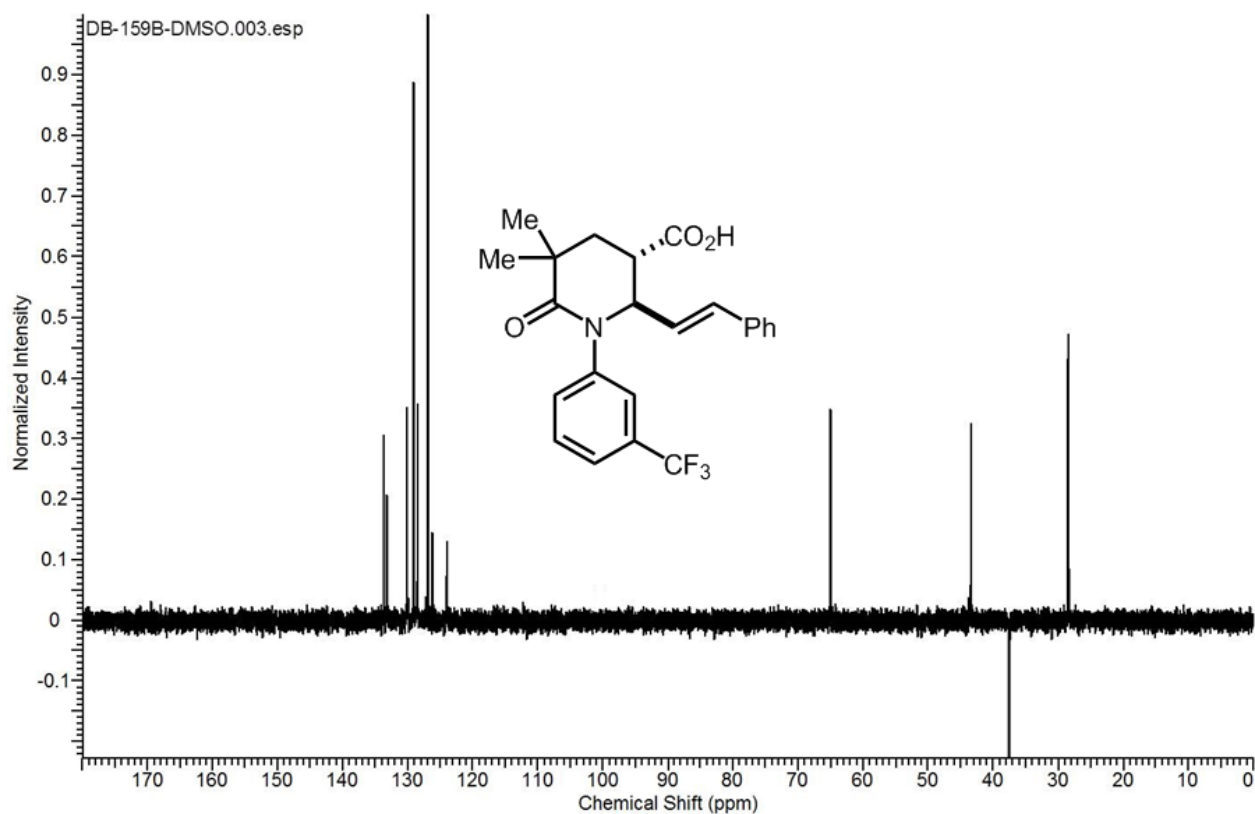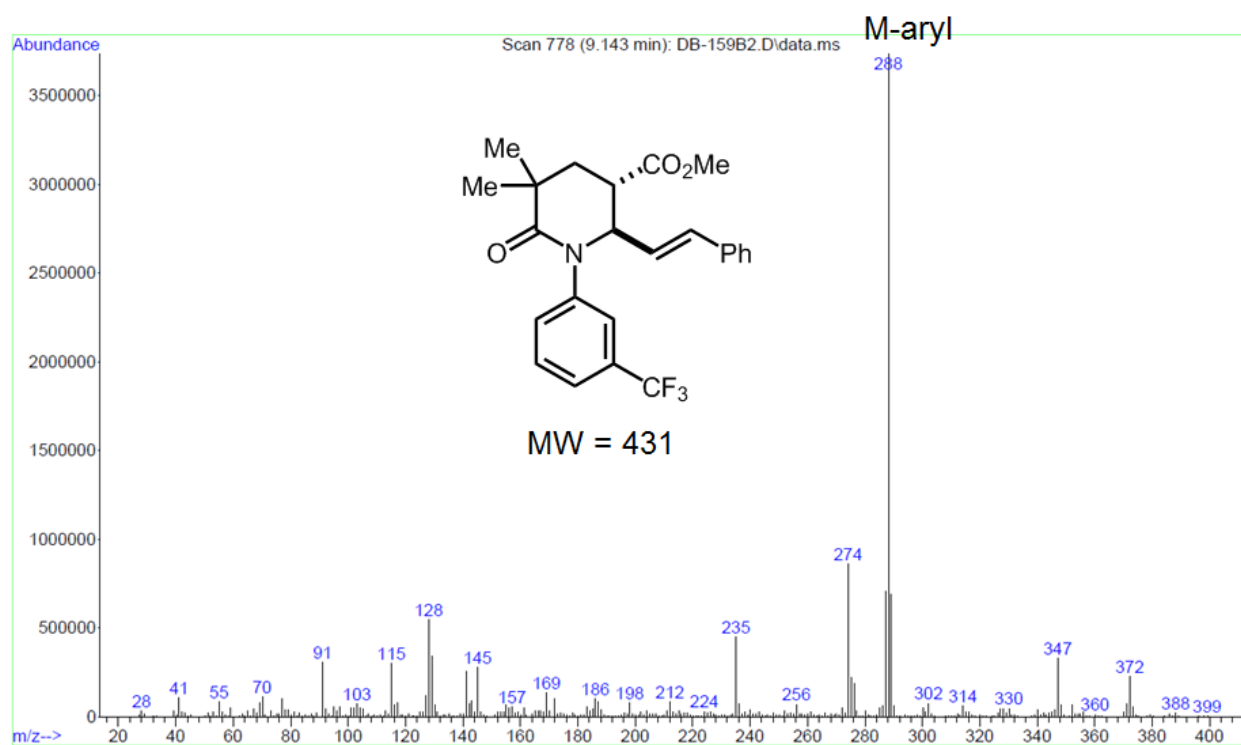

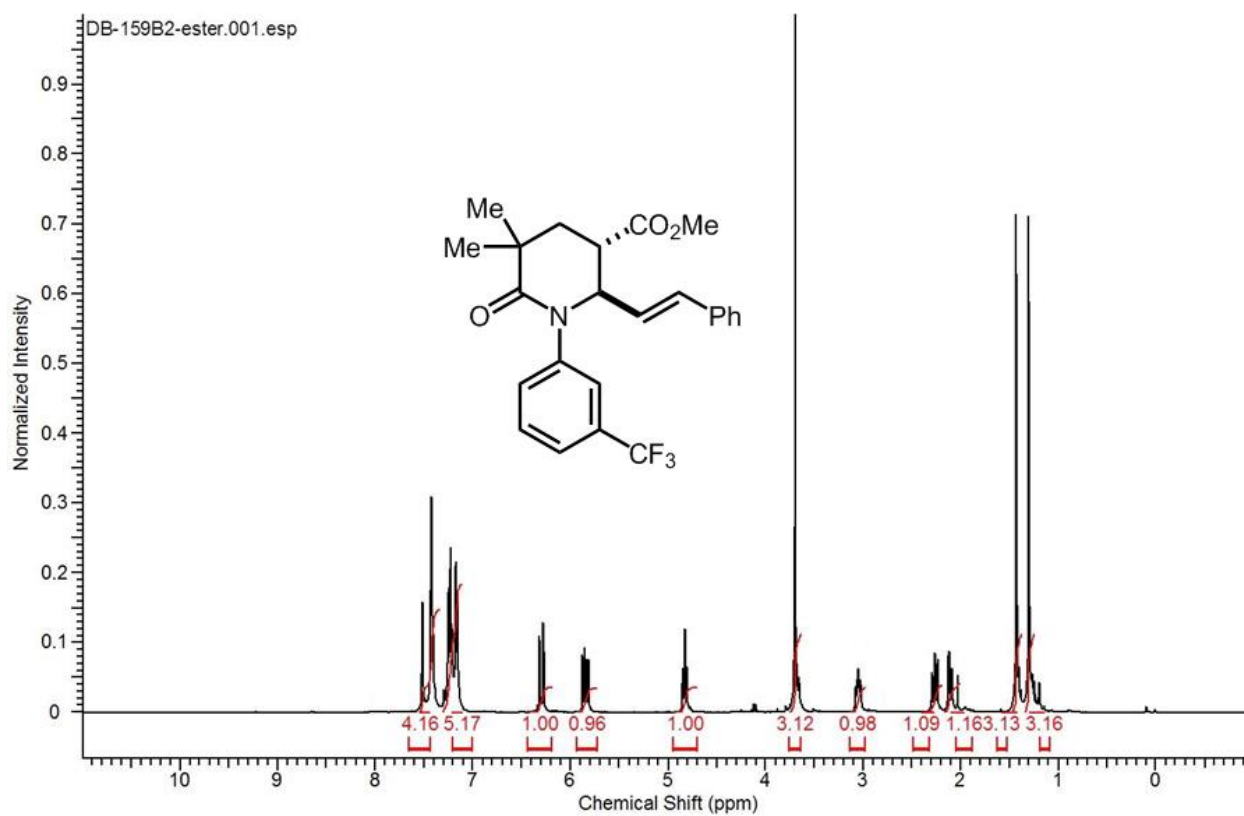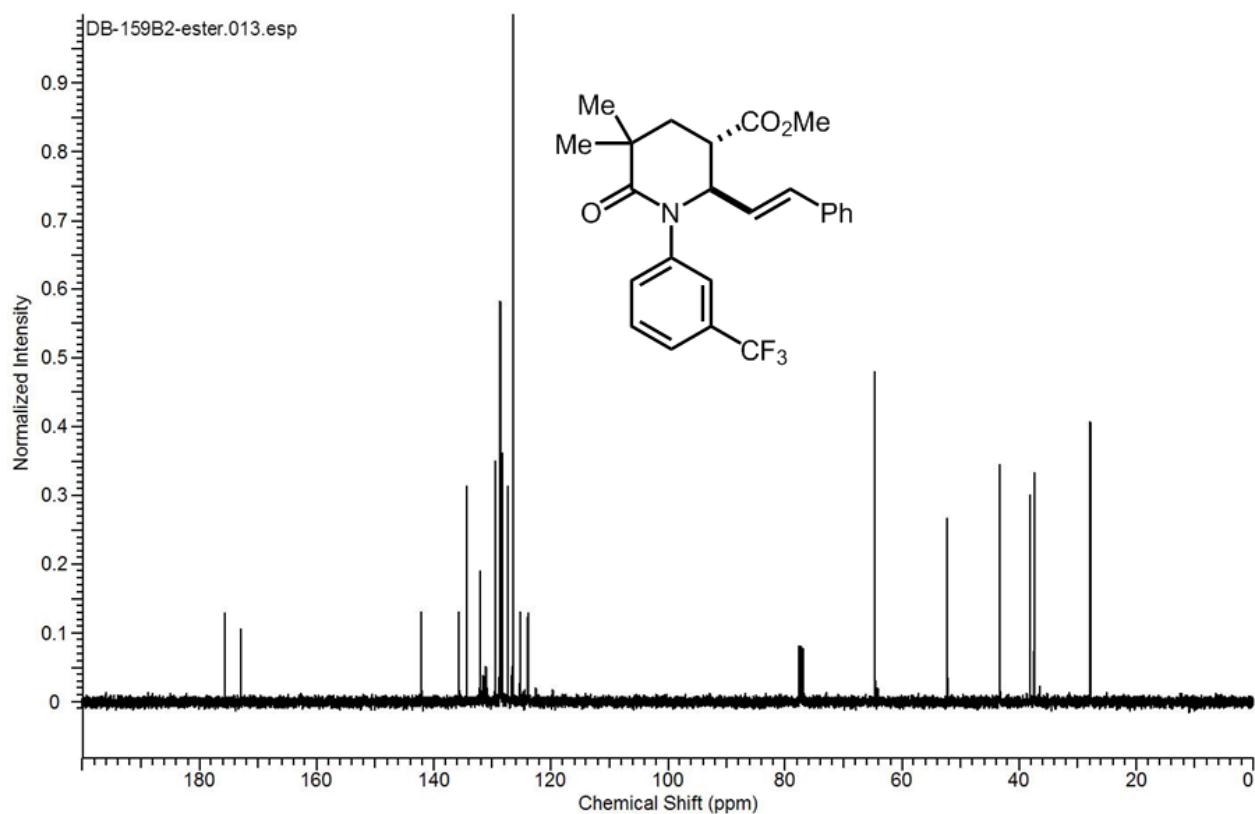

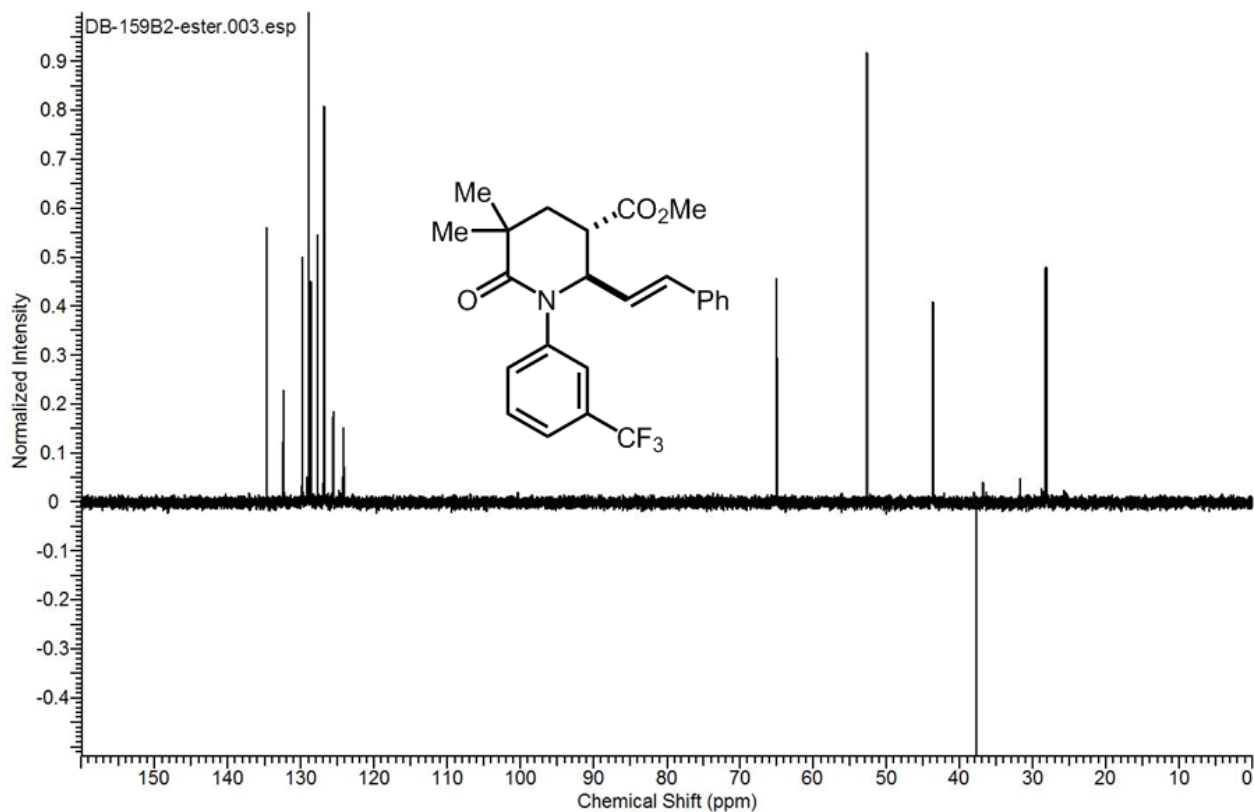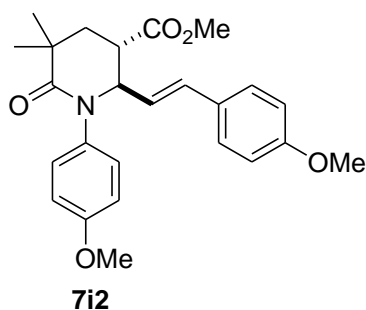

Prepared from imine **4f** (267 mg, 1.0 mmol) and 2,2-dimethyl glutaric anhydride (142 mg, 1.0 equiv), using General Procedures B and C. T = 105 °C, time = 22 h. Purification: Flash chromatography on silica eluting with hexane/EtOAc (50:50 to 0:100). Yield = 351 mg, 83% over 2 steps, 96:4 dr.  $^1\text{H}$  NMR (400 MHz,  $\text{CDCl}_3$ )  $\delta$  7.14 to 7.07 (4H, m), 6.83 to 6.77 (4H, m), 6.21 to 6.17 (1H, d), 5.76 to 5.70 (1H, dd), 4.71 to 4.67 (1H, t), 3.82 to 3.68 (9H, m), 3.01 to 2.96 (1H, m), 2.25 to 2.19 (1H, dd), 2.08 to 1.92 (1H, dd), 1.40 to 1.37 (6H, s,s).  $^{13}\text{C}$  NMR (101 MHz,  $\text{CDCl}_3$ )  $\delta$  175.6, 173.3, 159.5, 158.1, 134.3, 132.8, 129.3, 129.0, 128.8, 128.6, 127.9, 127.7, 125.9, 114.6, 114.2, 114.0, 113.9, 64.8, 55.5, 55.3, 52.1, 43.6, 38.0, 37.5, 28.4, 28.0. **HRMS- $\text{EI}^+$**  ( $m/z$ ): calc'd for  $\text{C}_{25}\text{H}_{29}\text{NO}_5$  423.2046; found 423.2051.

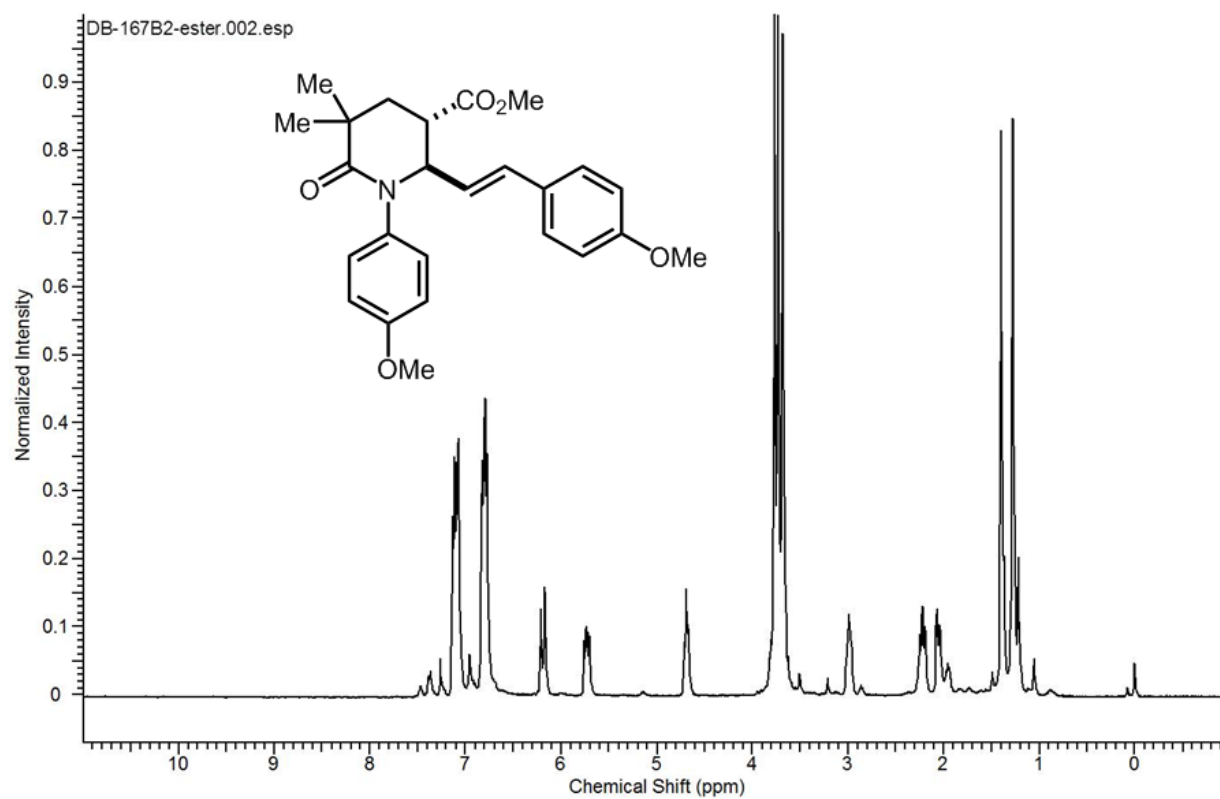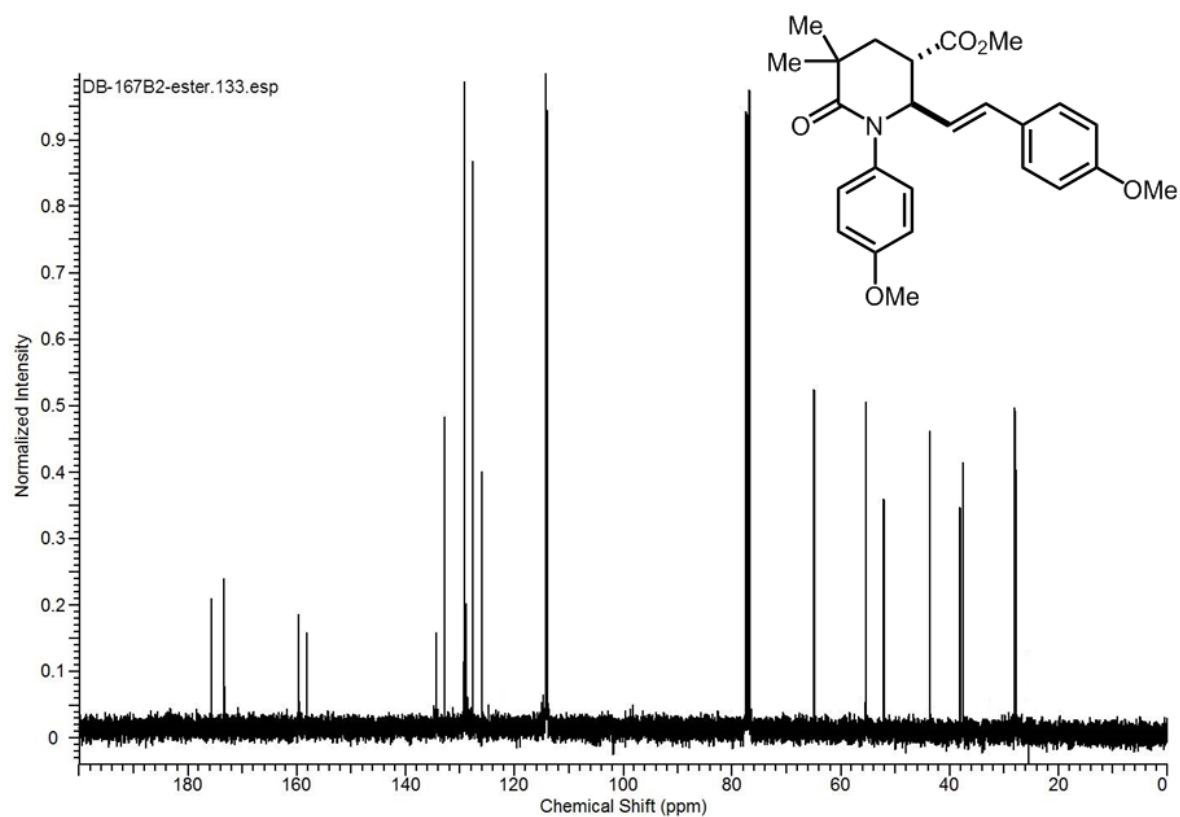

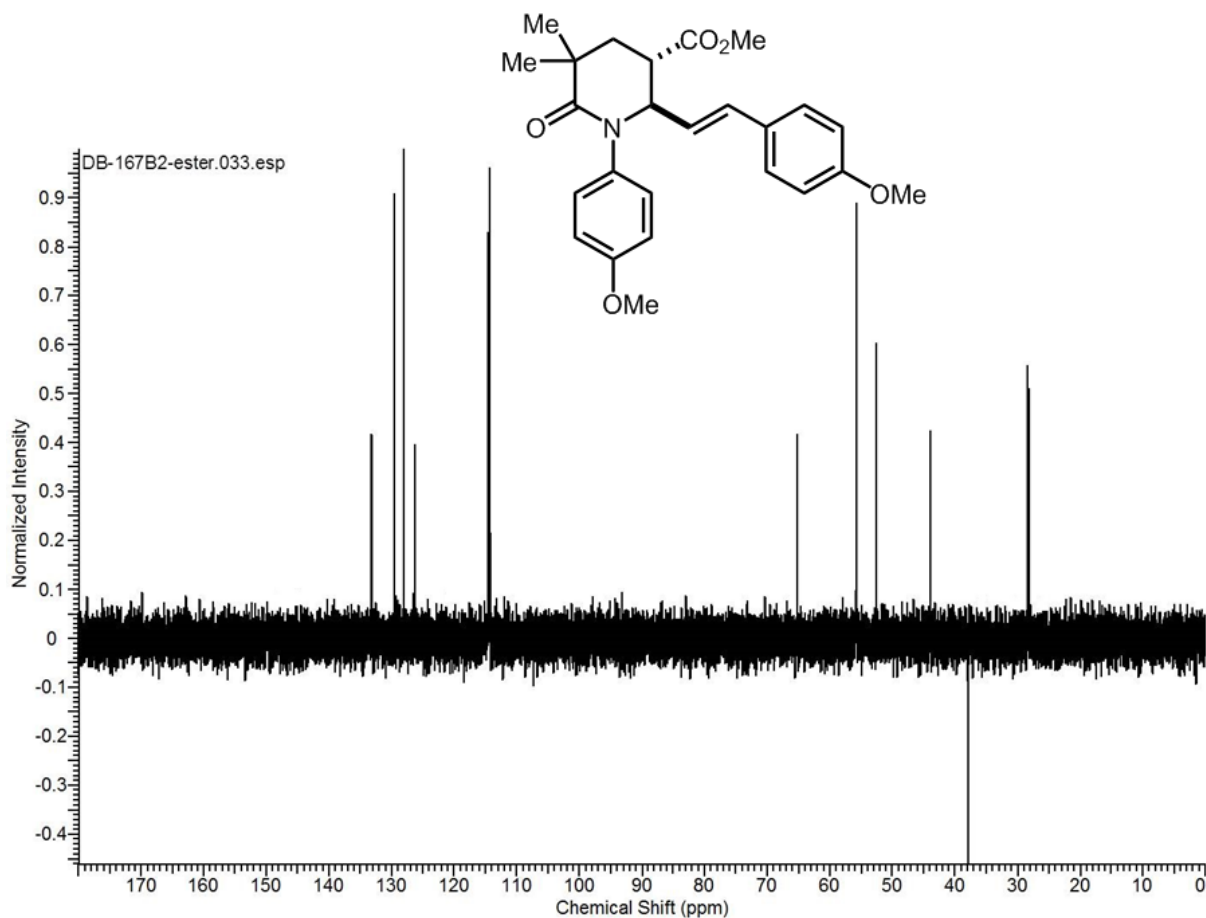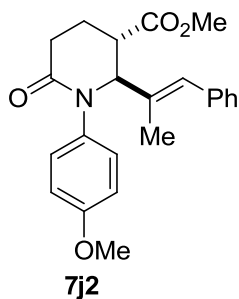

Prepared from imine **4i** (251 mg, 1.0 mmol) and glutaric anhydride (114 mg, 1.0 equiv), using General Procedures B and C. T = 105 °C, time = 18 h. Purification: Flash chromatography on silica eluting with hexane/EtOAc (50:50 to 0:100). Yield = 300 mg, 79% over 2 steps, 95:5 dr.

$^1\text{H}$  NMR (400 MHz,  $\text{CDCl}_3$ )  $\delta$  7.32 to 7.12 (7H, m), 6.88 (2H, d), 6.43 (1H, s), 4.75 (1H, d), 3.77 to 3.66 (6H, s,s), 2.87 to 2.85 (1H, m), 2.71 to 2.58 (2H, m), 2.26 to 2.20 (2H, m), 1.80 (3H, s).

$^{13}\text{C}$  NMR (101 MHz,  $\text{CDCl}_3$ )  $\delta$  172.9, 170.0, 158.2, 136.8, 134.5, 129.7, 128.8, 128.4, 128.2, 126.9, 114.2, 69.6, 55.4, 52.4, 42.9, 30.4, 21.1, 15.3. **HRMS- $\text{EI}^+$**  ( $m/z$ ): calc'd for  $\text{C}_{23}\text{H}_{25}\text{NO}_4$  379.1784; found 379.1789.

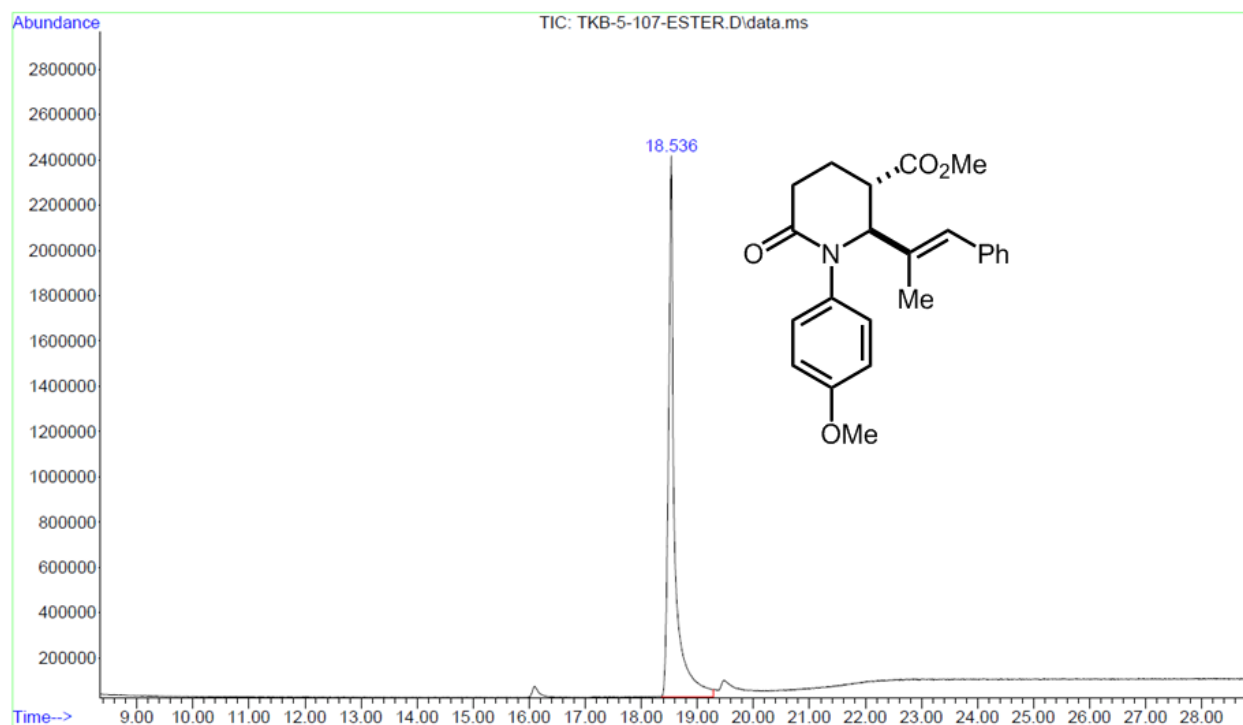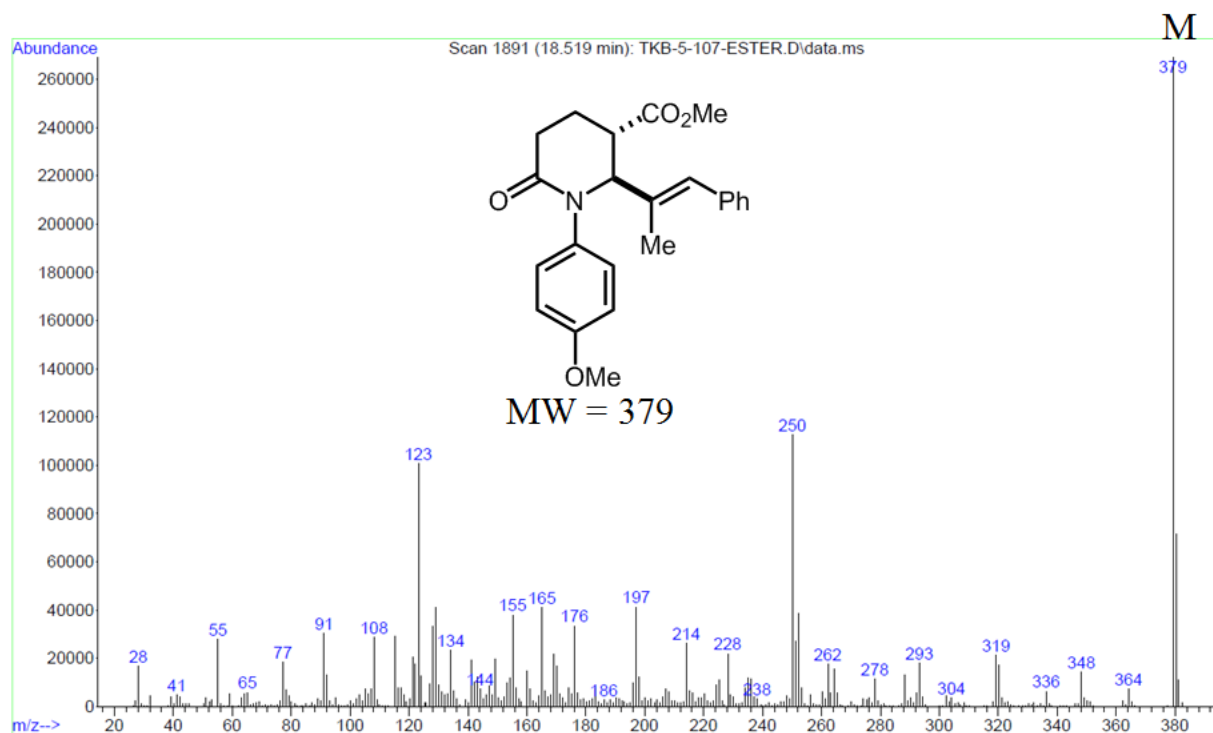

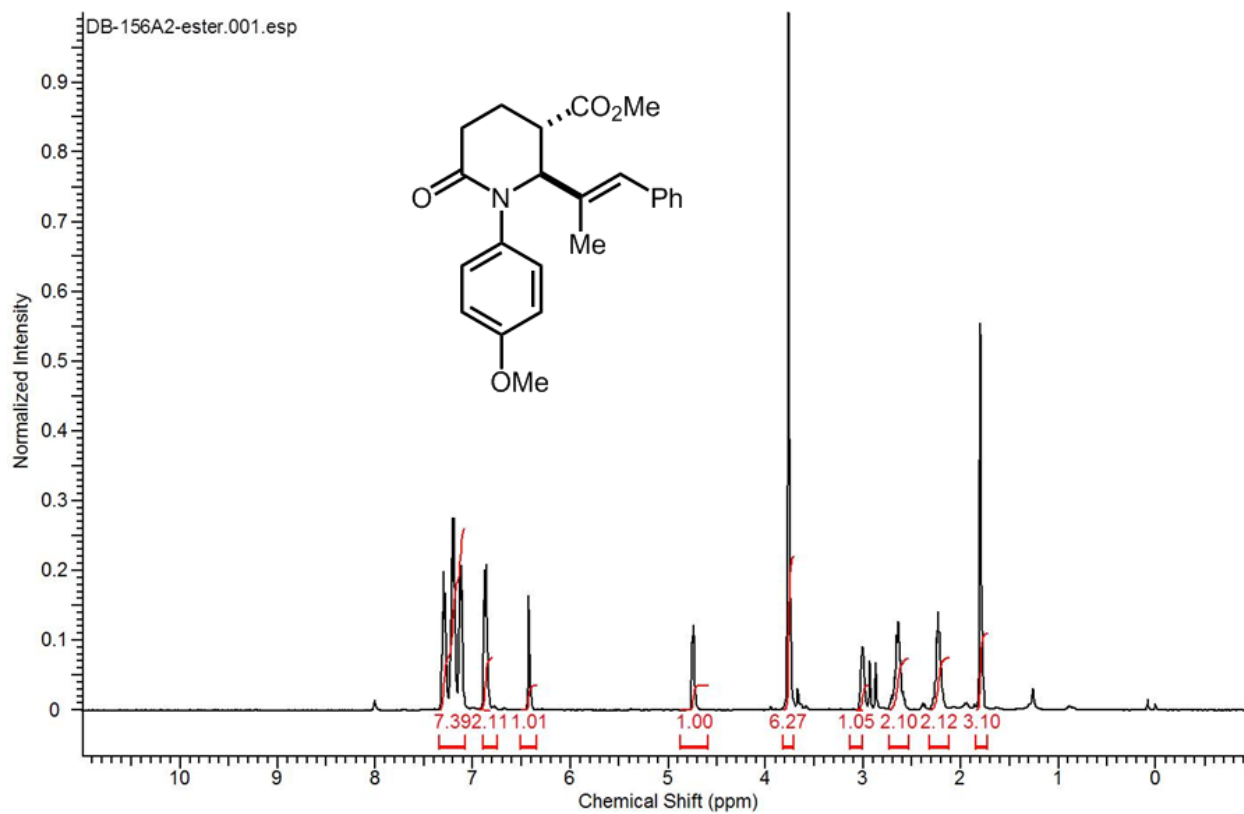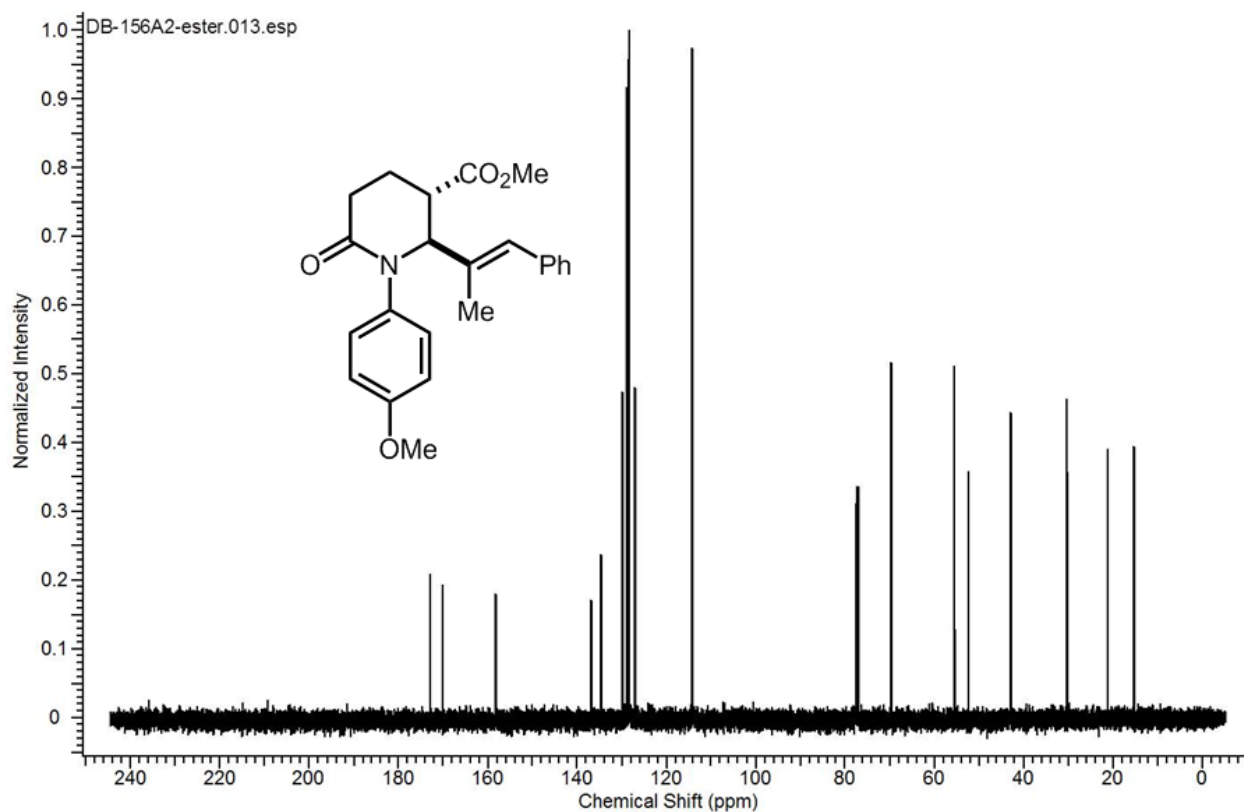

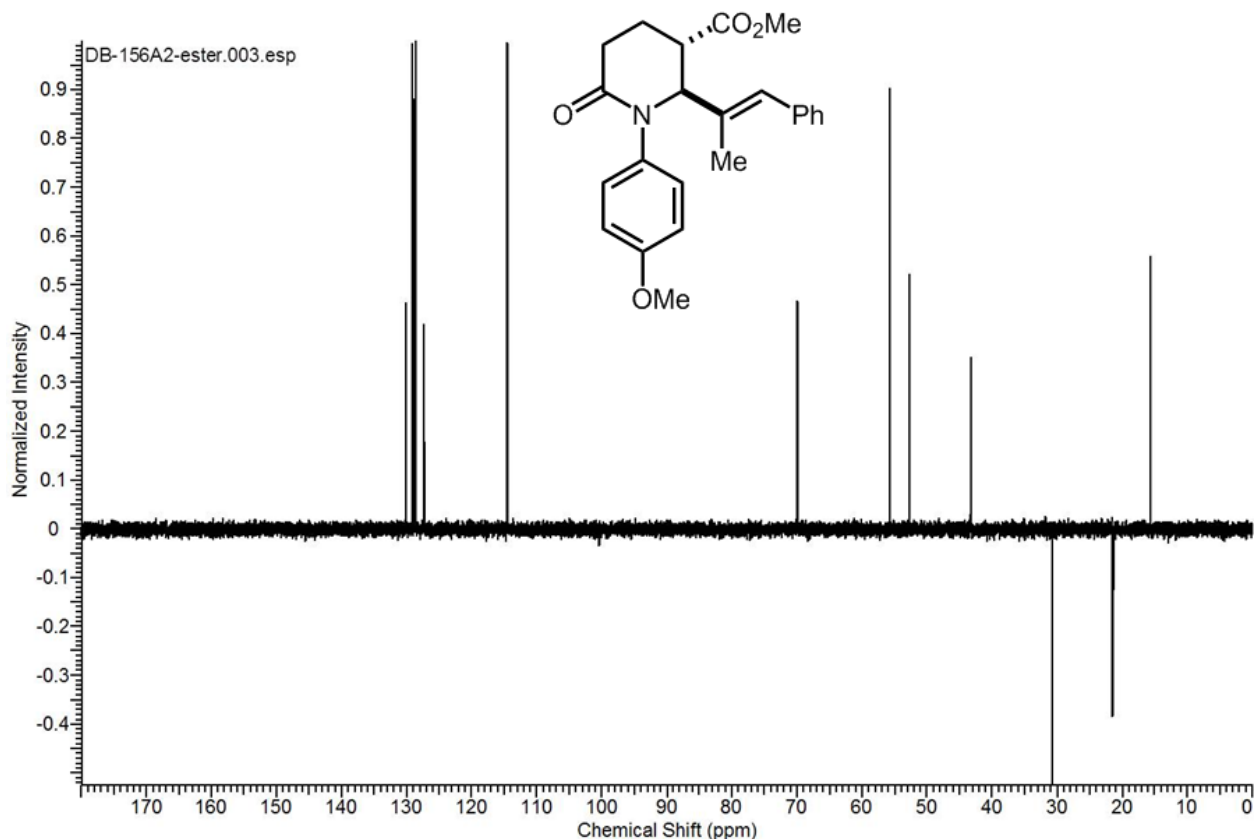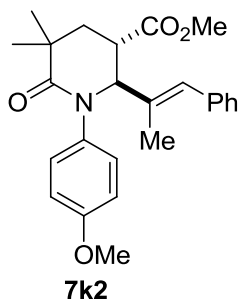

Prepared from imine **4i** (251 mg, 1.0 mmol) and 2,2-dimethyl glutaric anhydride (142 mg, 1.0 equiv), using General Procedures B and C. Temp = 110 °C, time = 36 h. Purification: Flash chromatography on silica eluting with hexane/EtOAc (50:50 to 0:100). Yield = 300 mg, 79% over 2 steps, 95:5 dr.  $^1\text{H}$  NMR (400 MHz,  $\text{CDCl}_3$ )  $\delta$  7.30 to 7.09 (5H, m), 7.01 to 6.96 (2H, d), 6.78 to 6.74 (2H, d), 6.26 (1H, s), 4.68 (1H, d), 3.78 to 3.73 (6H, s,s), 3.22 to 3.16 (1H, m), 2.31 to 2.19 (1H, dd), 2.03 to 1.97 (1H, dd), 1.74 (3H, s), 1.43 (3H, s), 1.41 (3H, s).  $^{13}\text{C}$  NMR (101 MHz,  $\text{CDCl}_3$ )  $\delta$  176.1, 173.3, 159.3, 136.8, 134.2, 133.8, 132.9, 131.3, 131.2, 129.3, 129.0, 128.9, 128.8, 128.7, 128.4, 128.2, 128.1, 127.9, 127.1, 126.8, 114.5, 70.8, 55.4, 52.2, 41.78, 38.7, 38.1, 28.6, 28.2, 27.0, 13.7. **HRMS-EI<sup>+</sup>** ( $m/z$ ): calc'd for  $\text{C}_{25}\text{H}_{29}\text{NO}_4$  407.2097; found 407.2093.



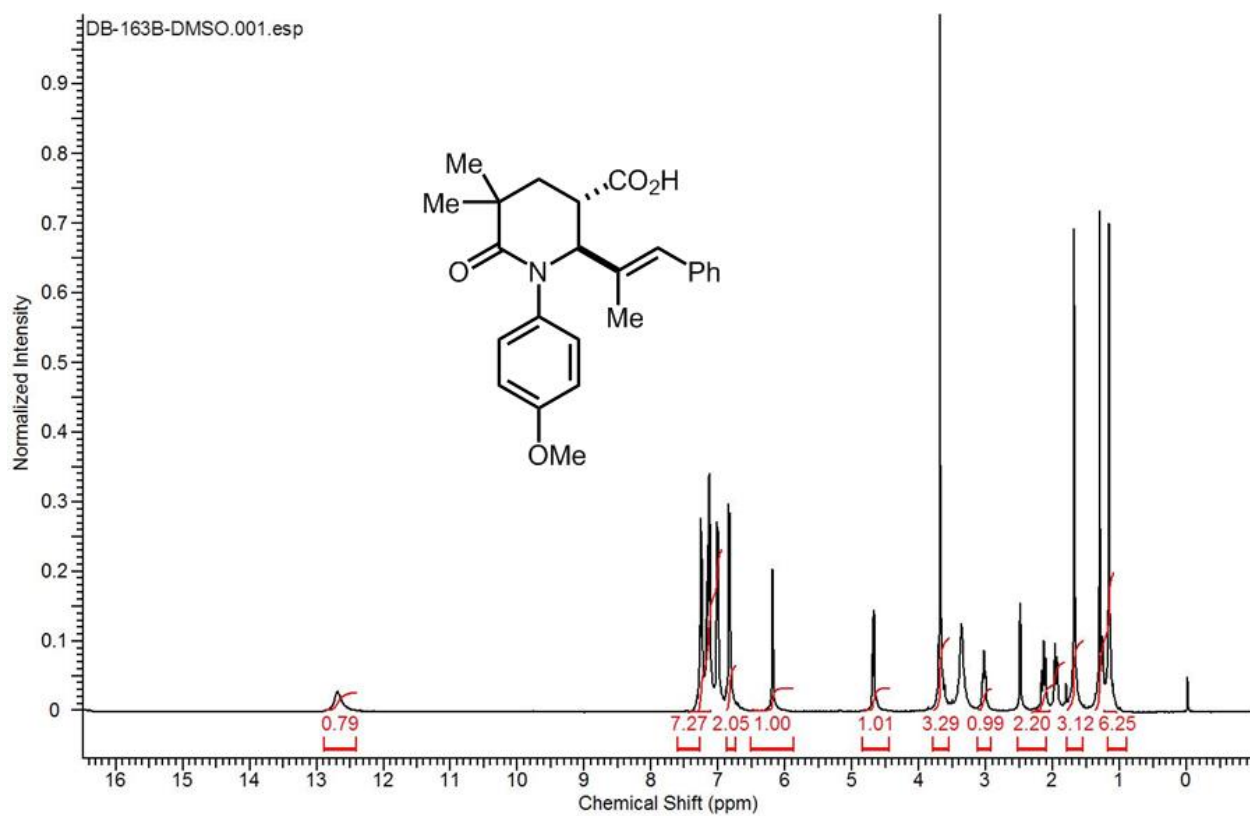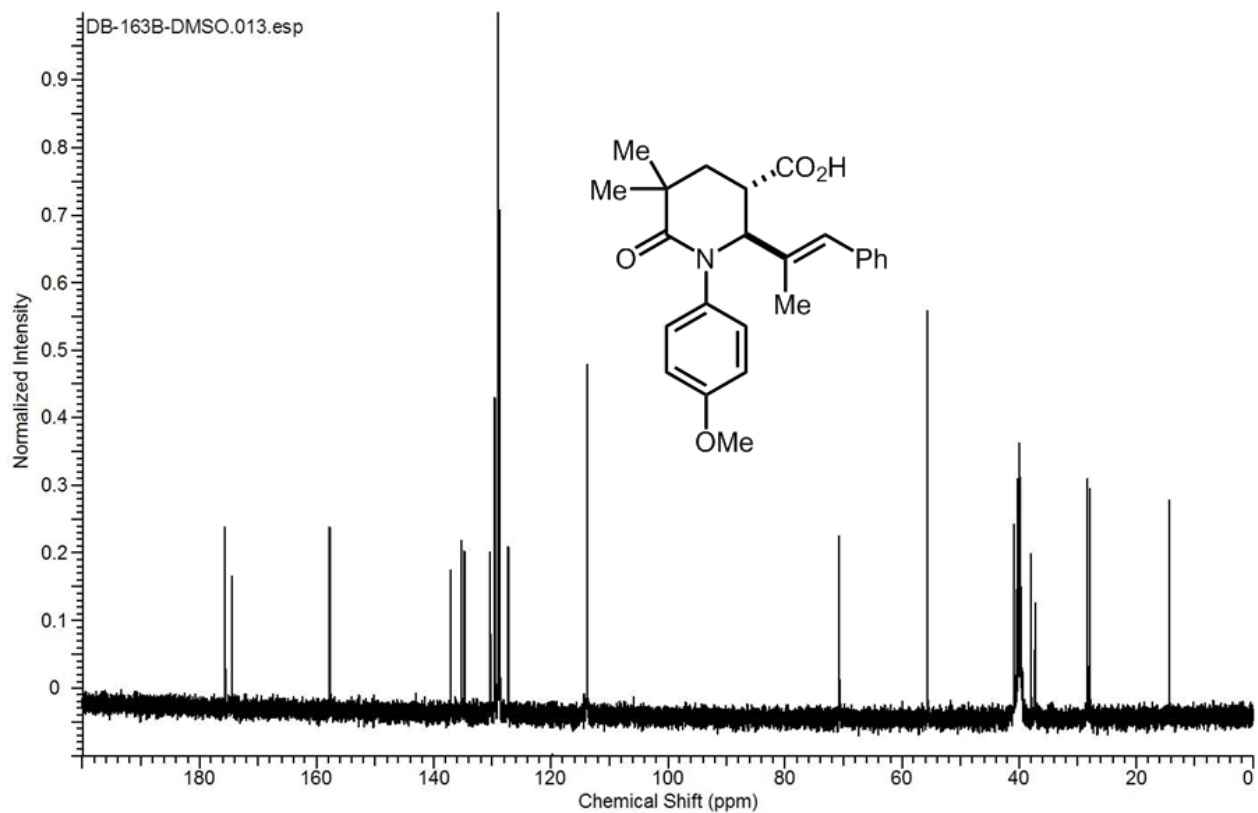

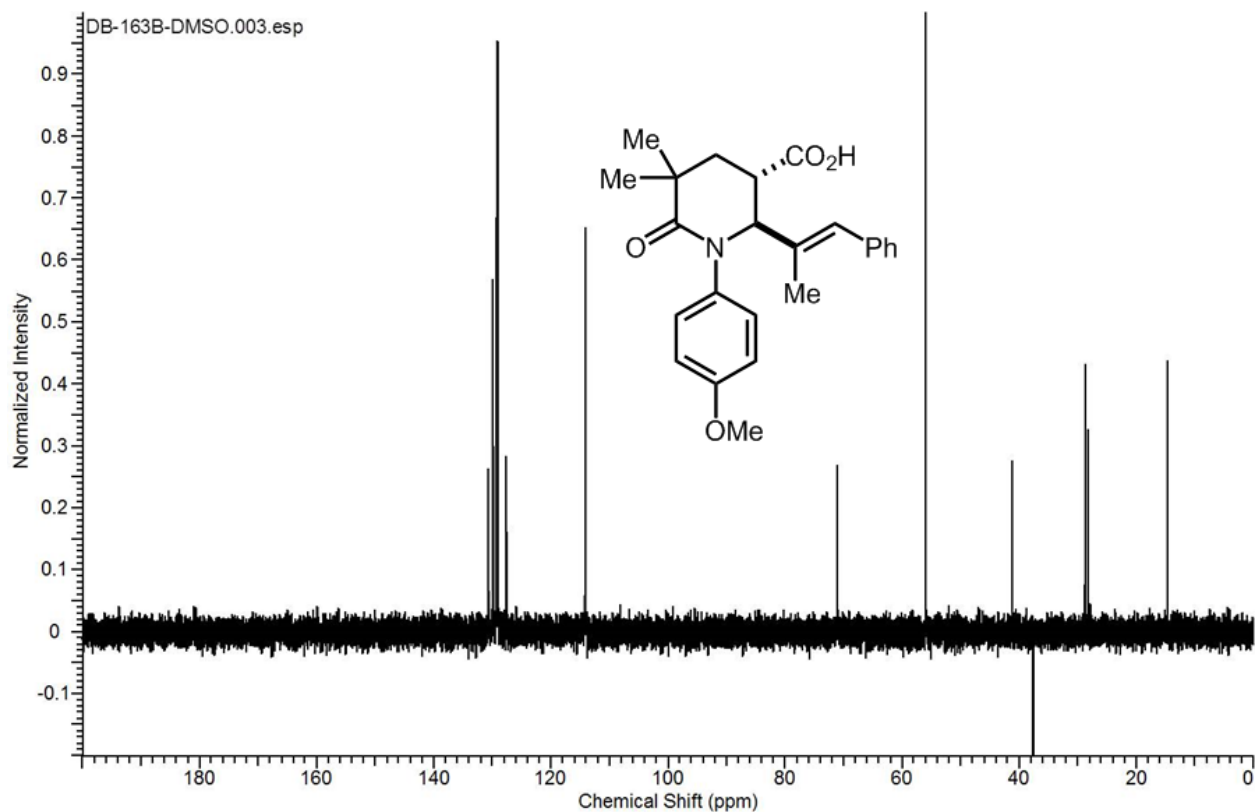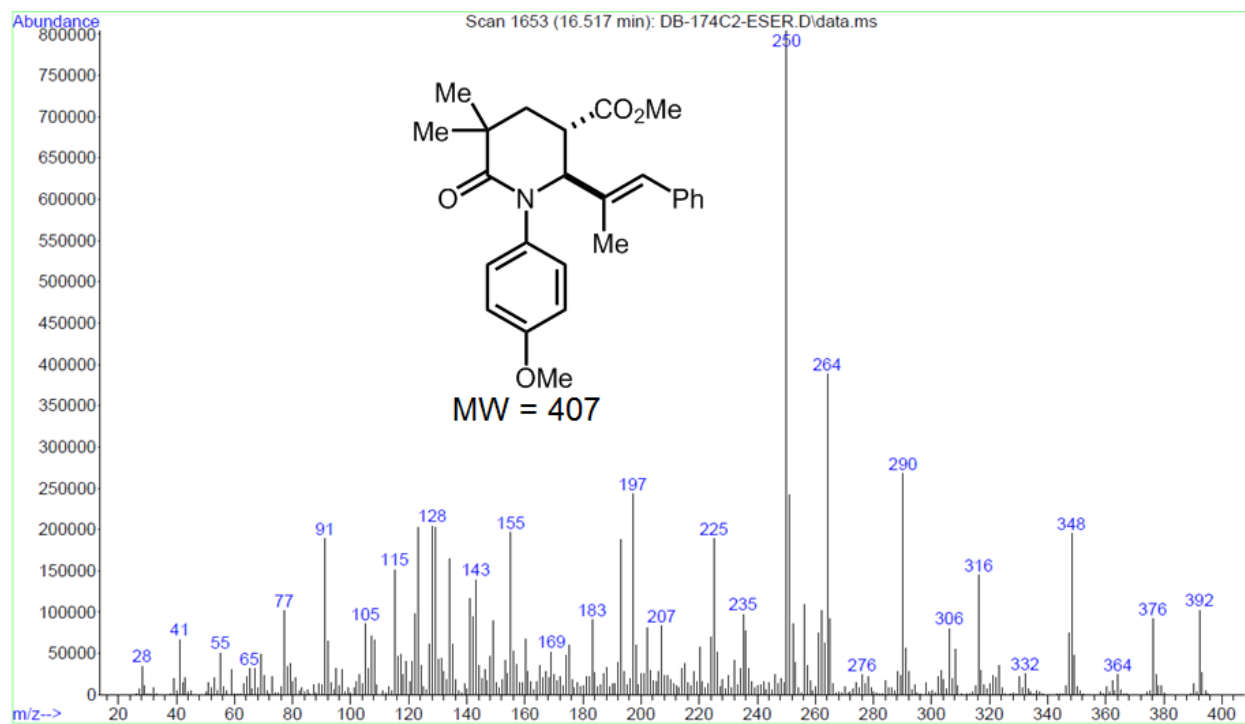

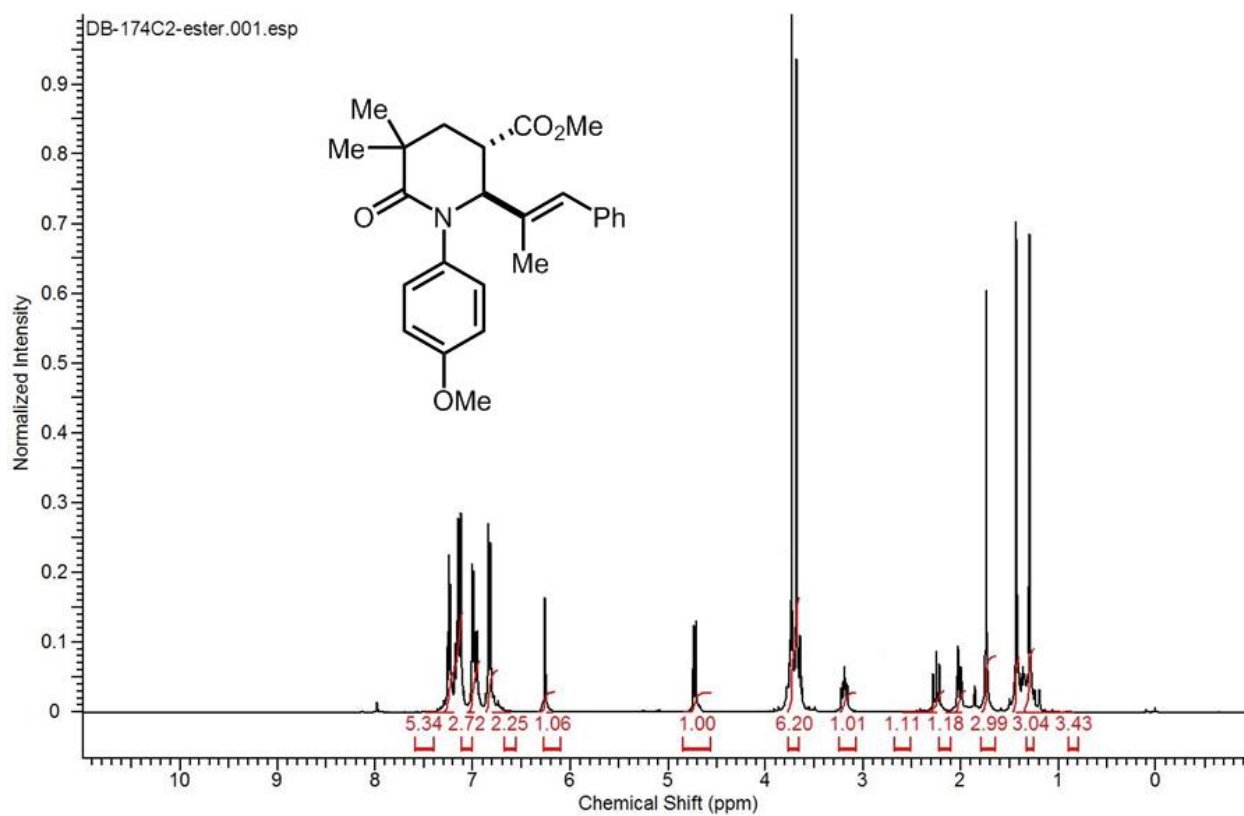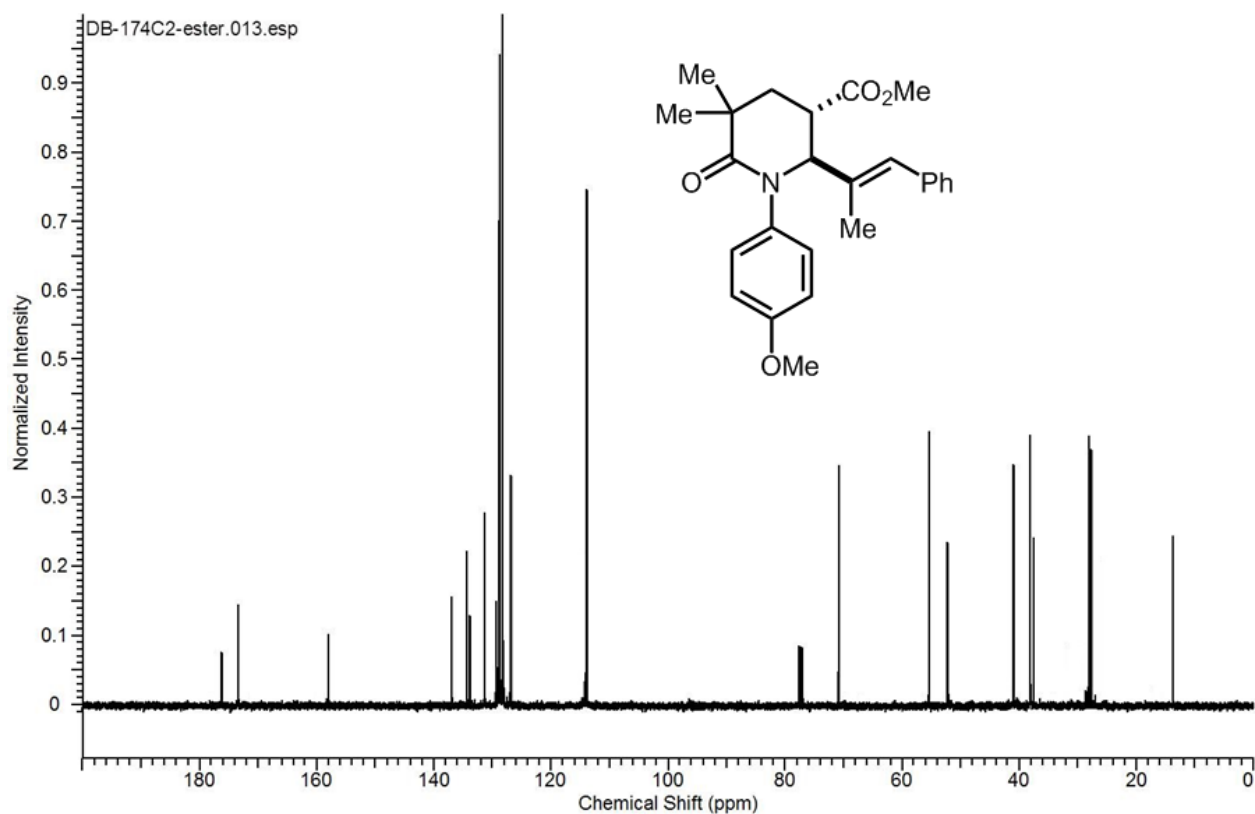

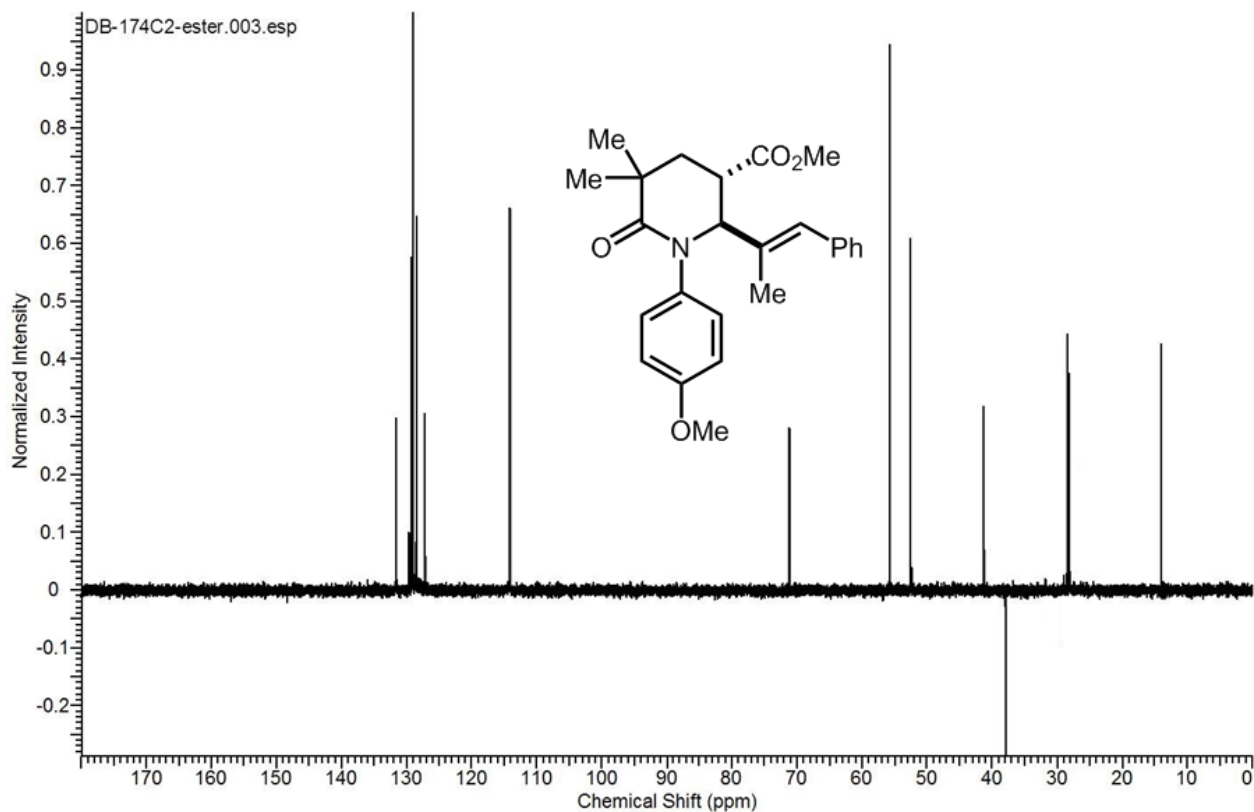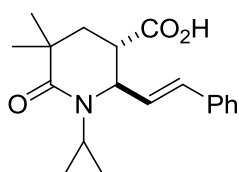**7i1**

Prepared from imine **4k** (171 mg, 1.0 mmol) and 2,2-dimethyl glutaric anhydride (142 mg, 1.0 equiv), using General Procedures B and C. Temp = 100 °C, time = 18 h. Purification: Flash chromatography on silica eluting with hexane/EtOAc (50:50 to 0:100). Yield = 235 mg, 75%, 98:2 dr. <sup>1</sup>H NMR (400 MHz, MeOH) δ 11.12 (1H, br. s), 7.42 to 7.22 (5H, m), 6.53 to 6.50 (1H, d), 6.22 to 6.16 (1H, dd), 4.50 to 4.48 (1H, t), 2.86 to 2.81 (1H, t), 2.57 to 2.48 (1H, t), 1.80 to 1.77 (2H, m), 1.26 to 0.53 (10H, m). <sup>13</sup>C NMR (101 MHz, MeOH) δ 179.1, 174.7, 136.2, 132.9, 128.3, 127.6, 126.2, 61.9, 48.2, 48.0, 48.0, 47.8, 47.8, 47.65, 47.5, 47.4, 47.3, 47.2, 47.1, 47.0, 42.3, 38.0, 36.0, 28.7, 27.3, 25.9, 9.34, 5.9. **HRMS-ESI<sup>+</sup>** (*m/z*): calc'd for C<sub>19</sub>H<sub>23</sub>NO<sub>3</sub> 313.1678; found 313.1683.

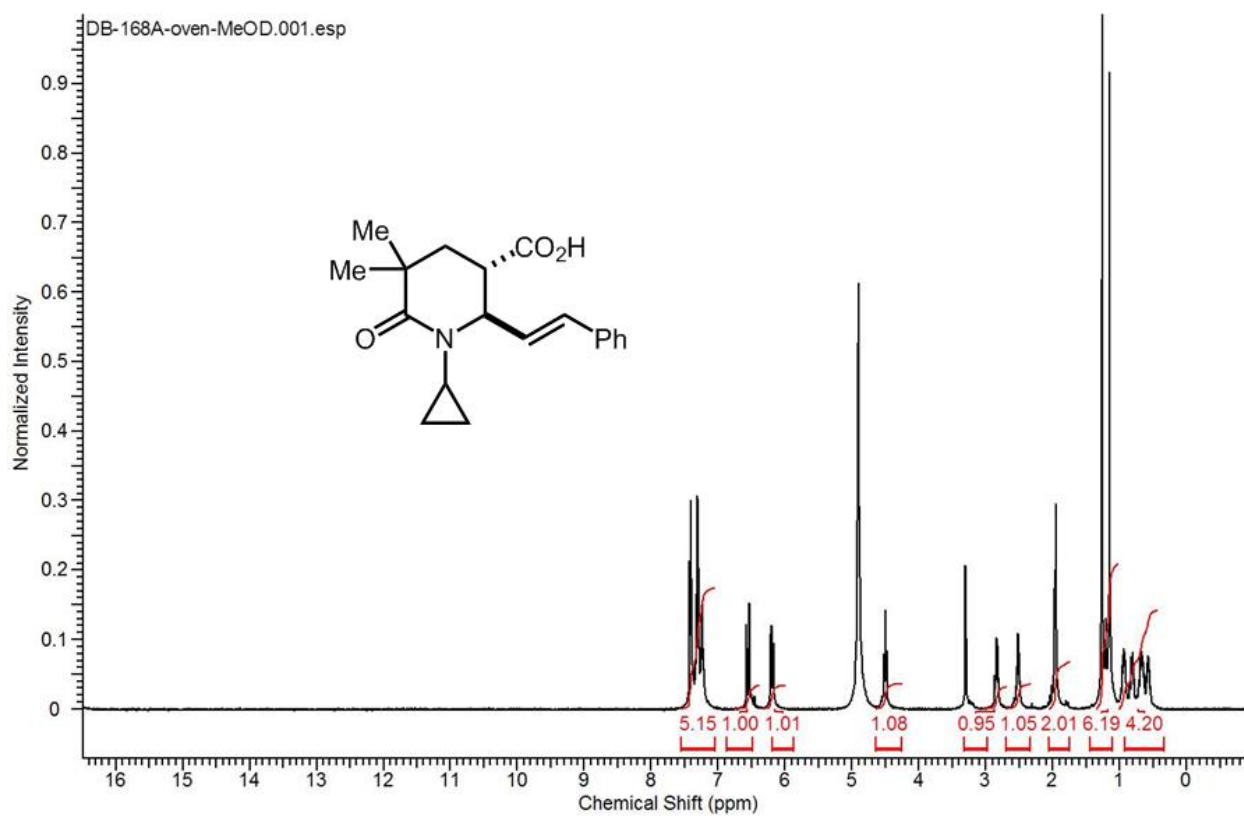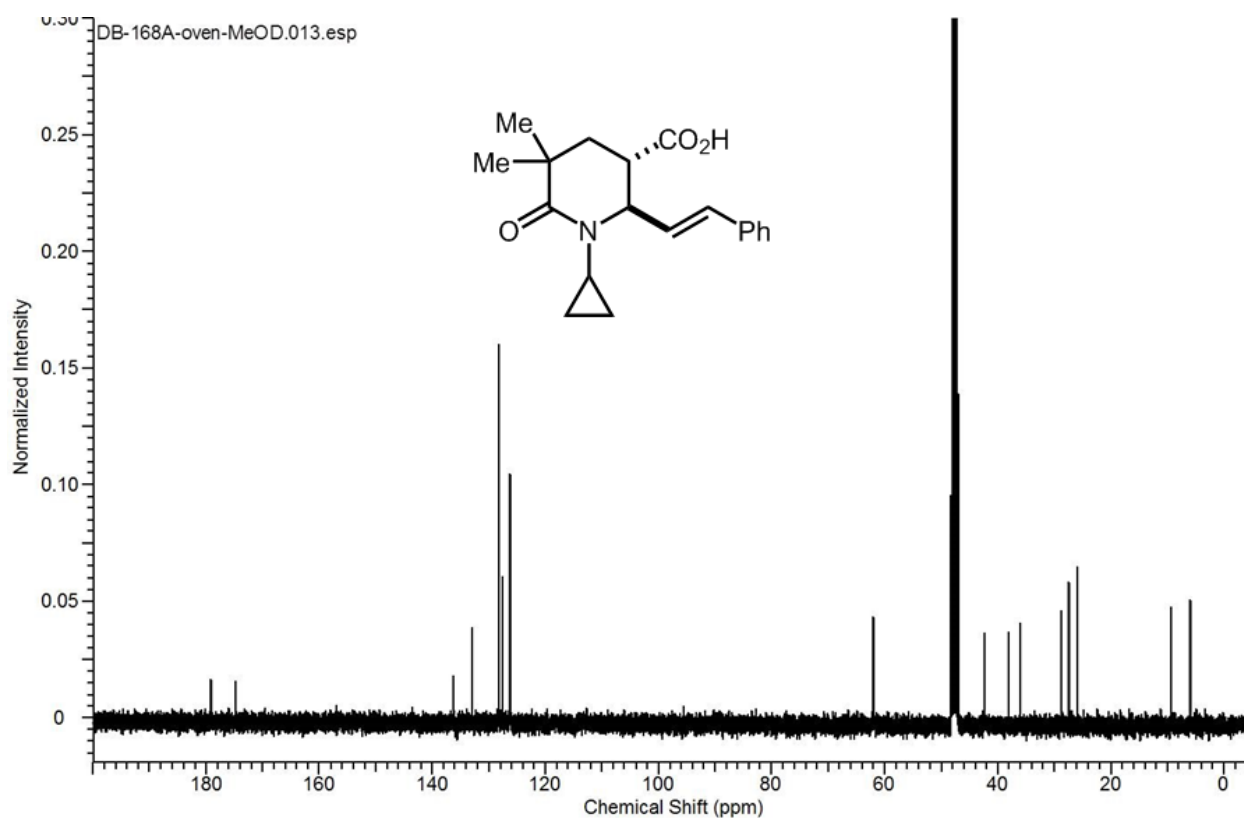

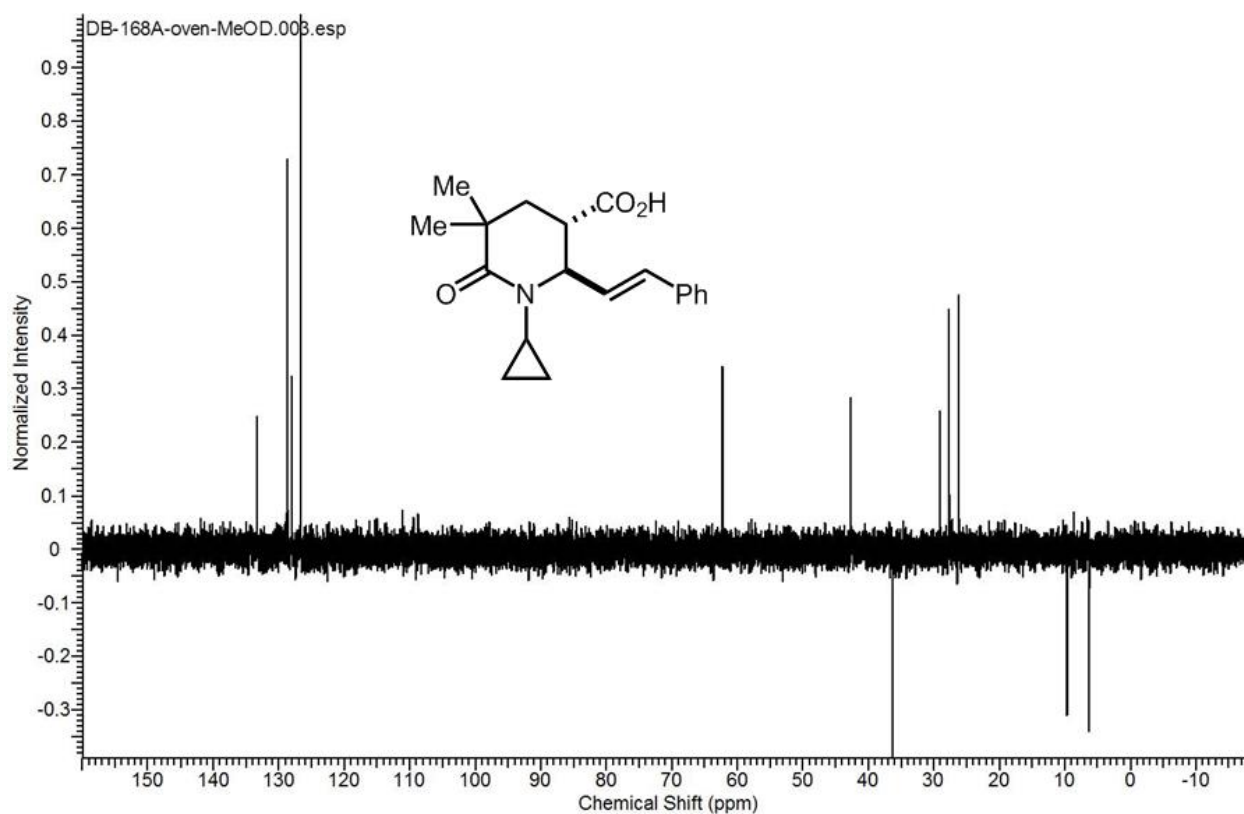

Methylation of the ester led to some minimal epimerization

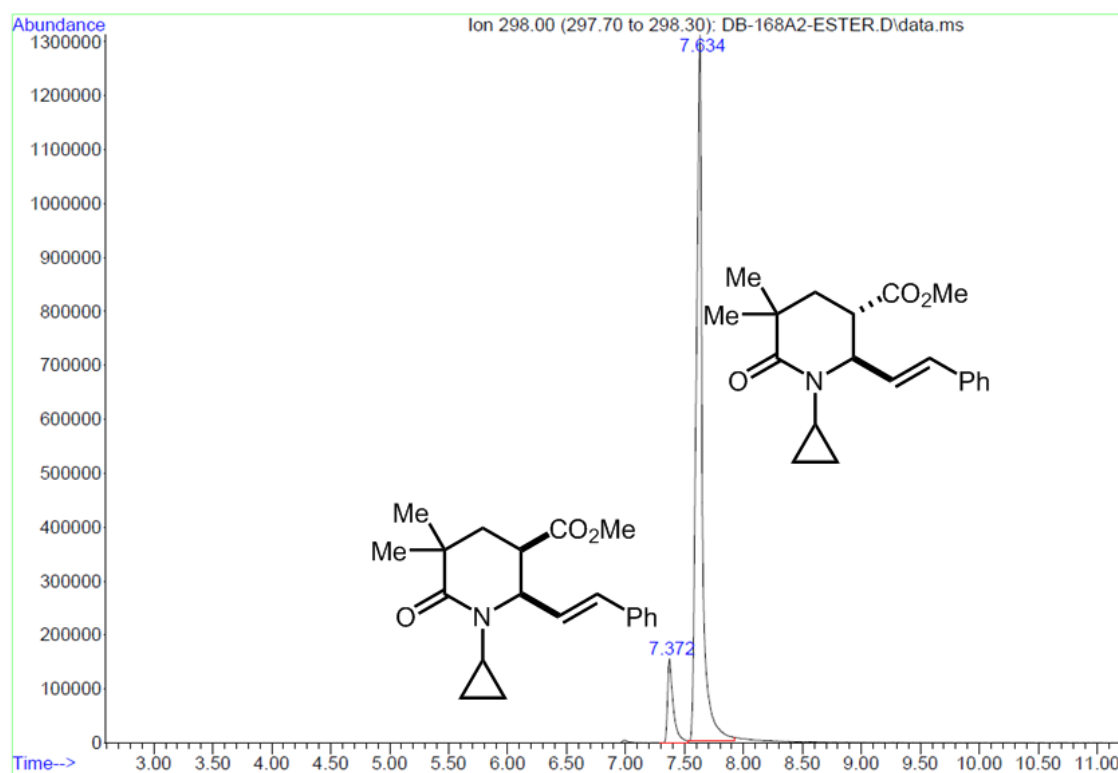

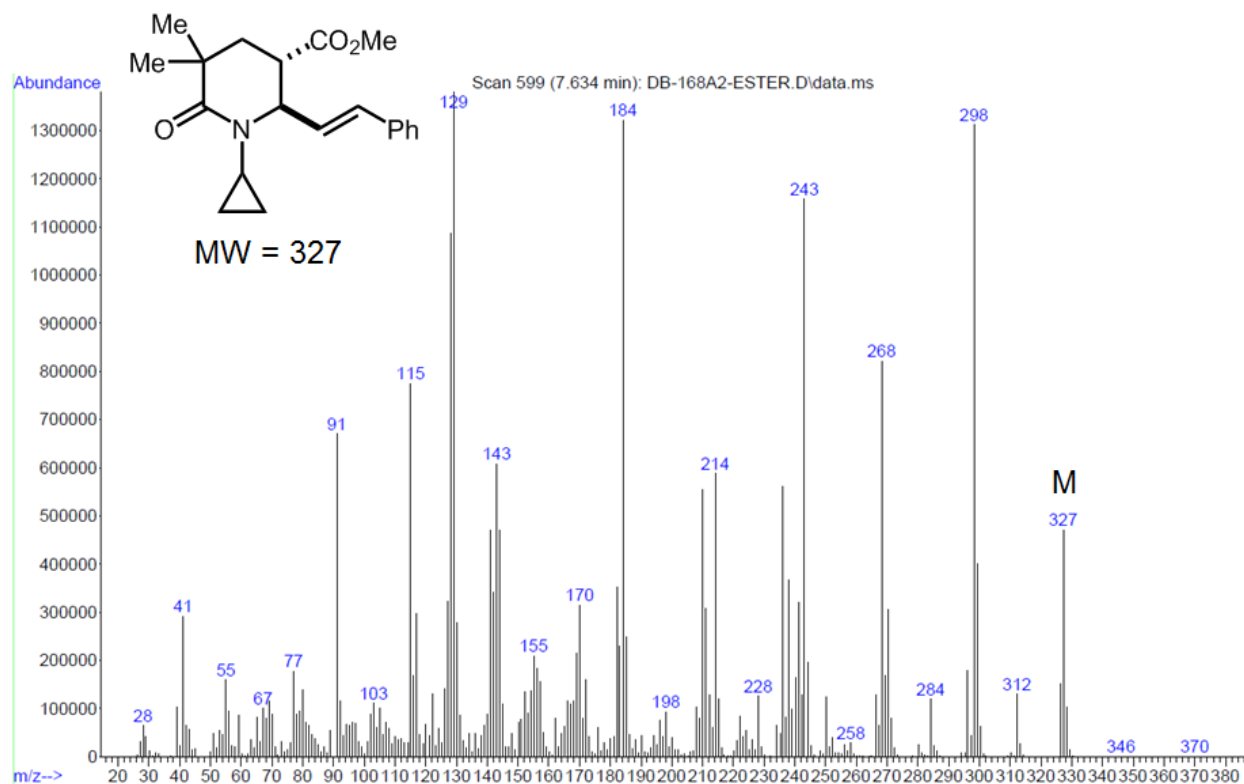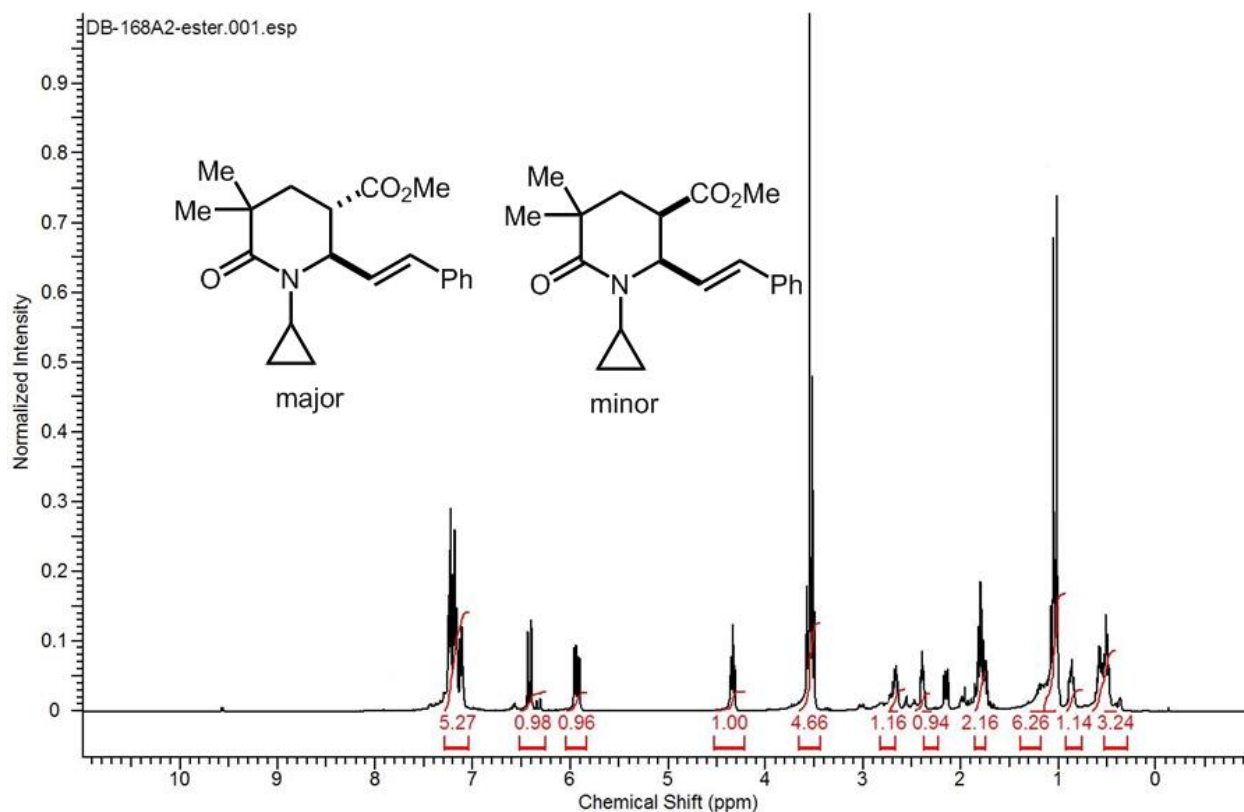

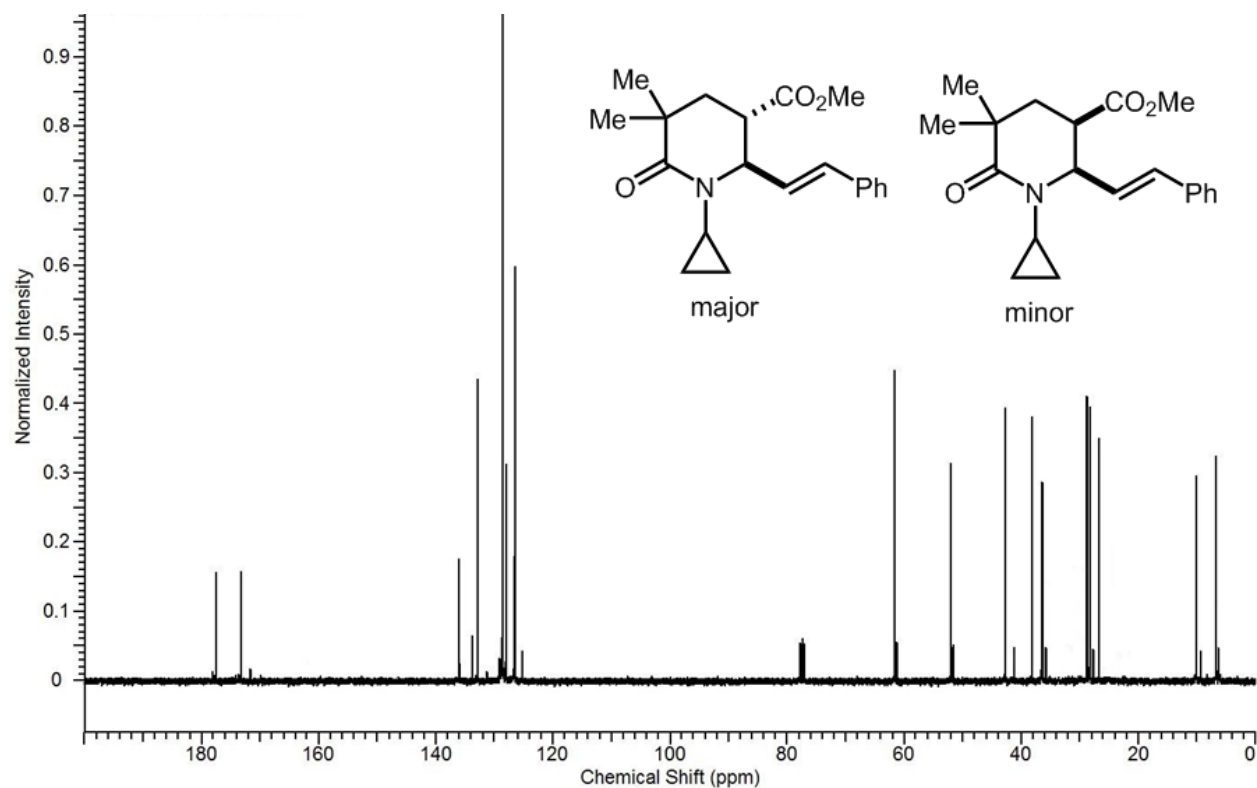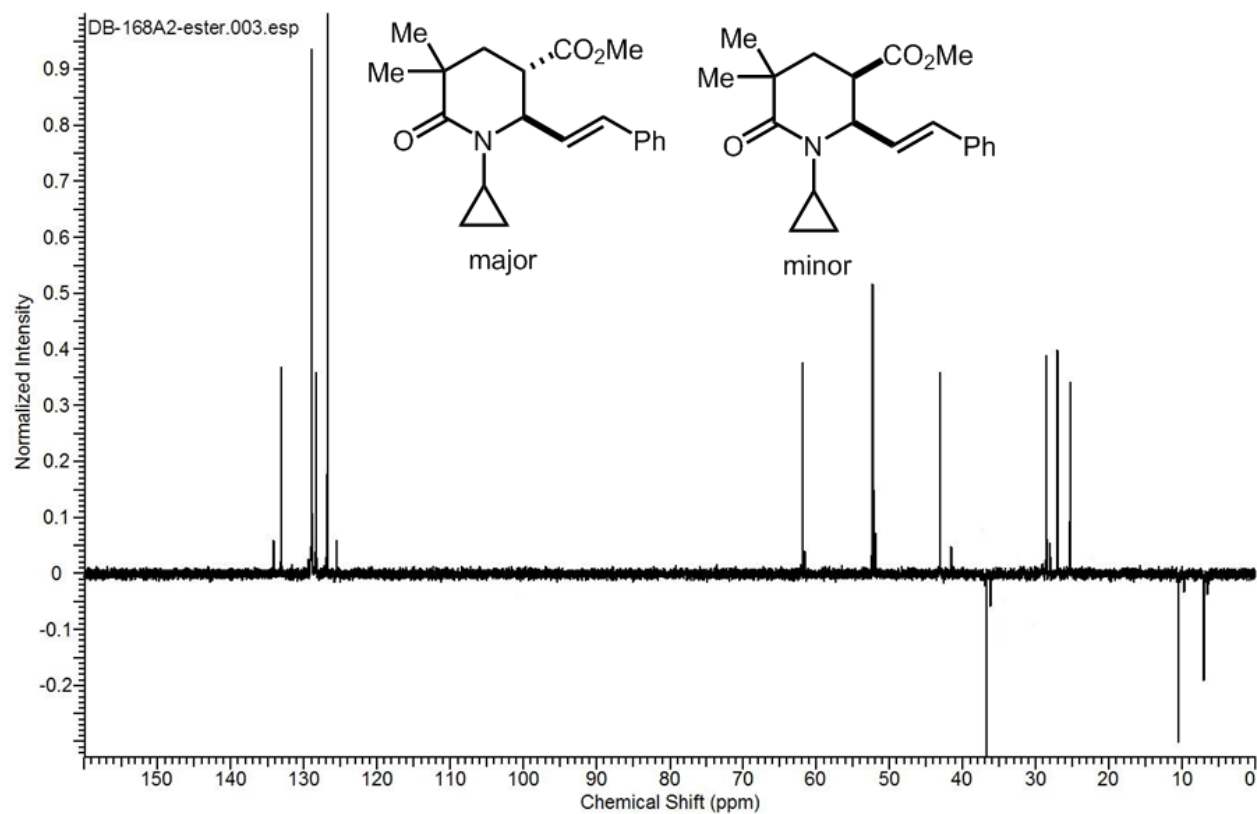



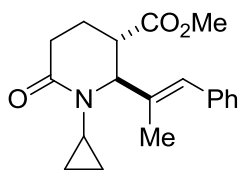**7m2**

Prepared from imine **4l** (185 mg, 1.0 mmol) and glutaric anhydride (114 mg, 1.0 equiv), using General Procedures B and C. Temp = 100 °C, time = 18 h. Purification: Flash chromatography on silica eluting with hexane/EtOAc (50:50 to 0:100). Yield = 226 mg, 72% over 2 steps, 98:2 dr.  $^1\text{H}$  NMR (400 MHz,  $\text{CDCl}_3$ )  $\delta$  7.30 to 7.13 (5H, m), 6.30 (1H, s), 4.36 to 4.33 (1H, d), 3.69 (3H, s), 2.88 to 2.80 (1H, dd), 2.54 to 2.30 (3H, m), 1.89 to 1.75 (5H, m), 0.96 to 0.91 (1H, m), 0.70 to 0.51 (3H, m).  $^{13}\text{C}$  NMR (101 MHz,  $\text{CDCl}_3$ )  $\delta$  172.8, 171.7, 136.8, 135.2, 129.1, 128.9, 128.4, 128.2, 128.2, 128.2, 128.1, 127.0, 126.9, 66.2, 51.9, 42.3, 30.4, 28.0, 20.1, 16.4, 8.8, 5.6. **HRMS- $\text{EI}^+$**  ( $m/z$ ): calc'd for  $\text{C}_{19}\text{H}_{23}\text{NO}_3$  313.1678; found 313.1683.

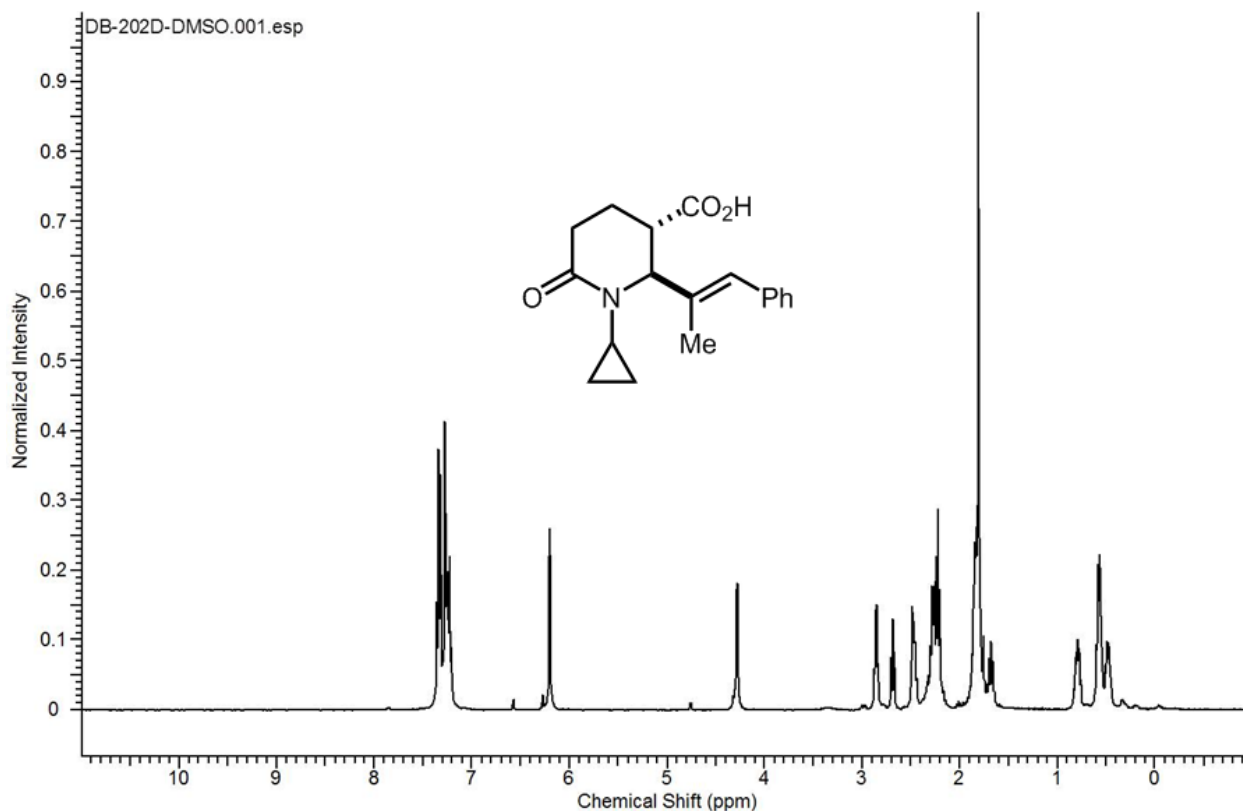

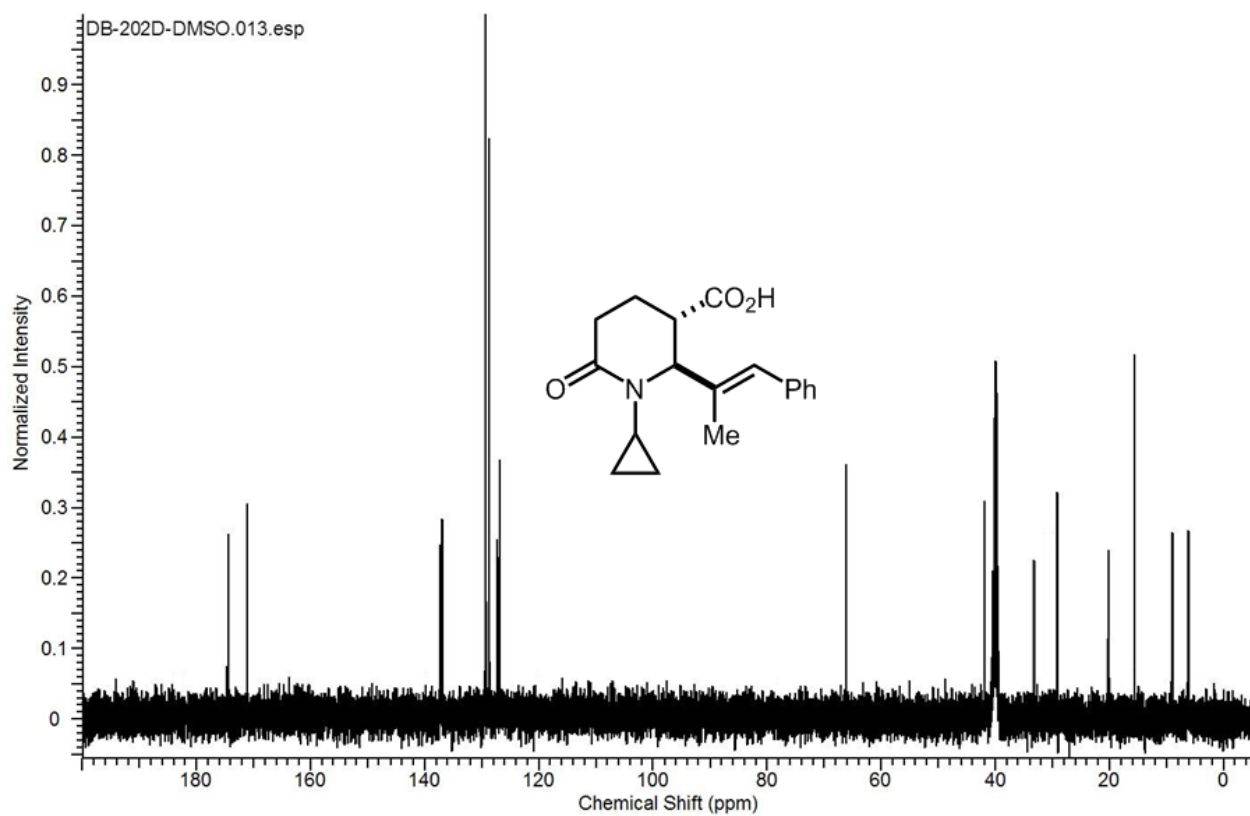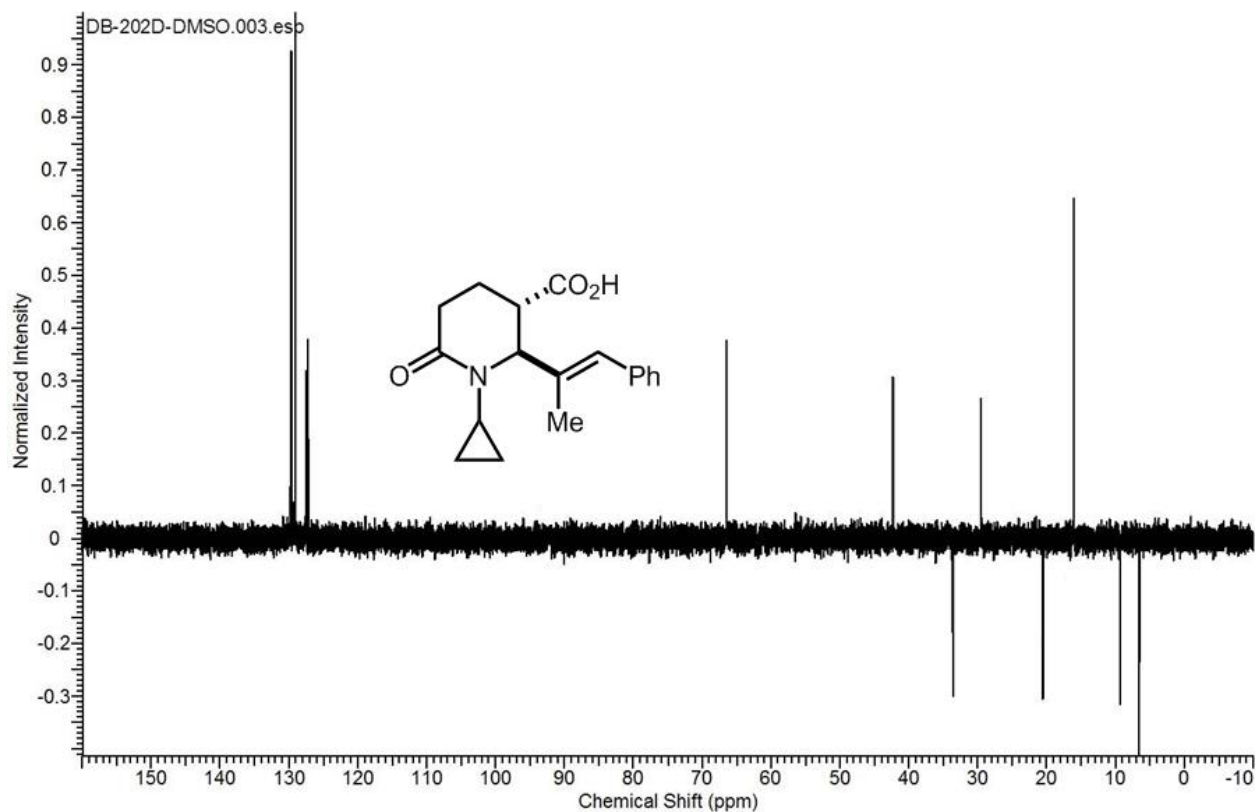

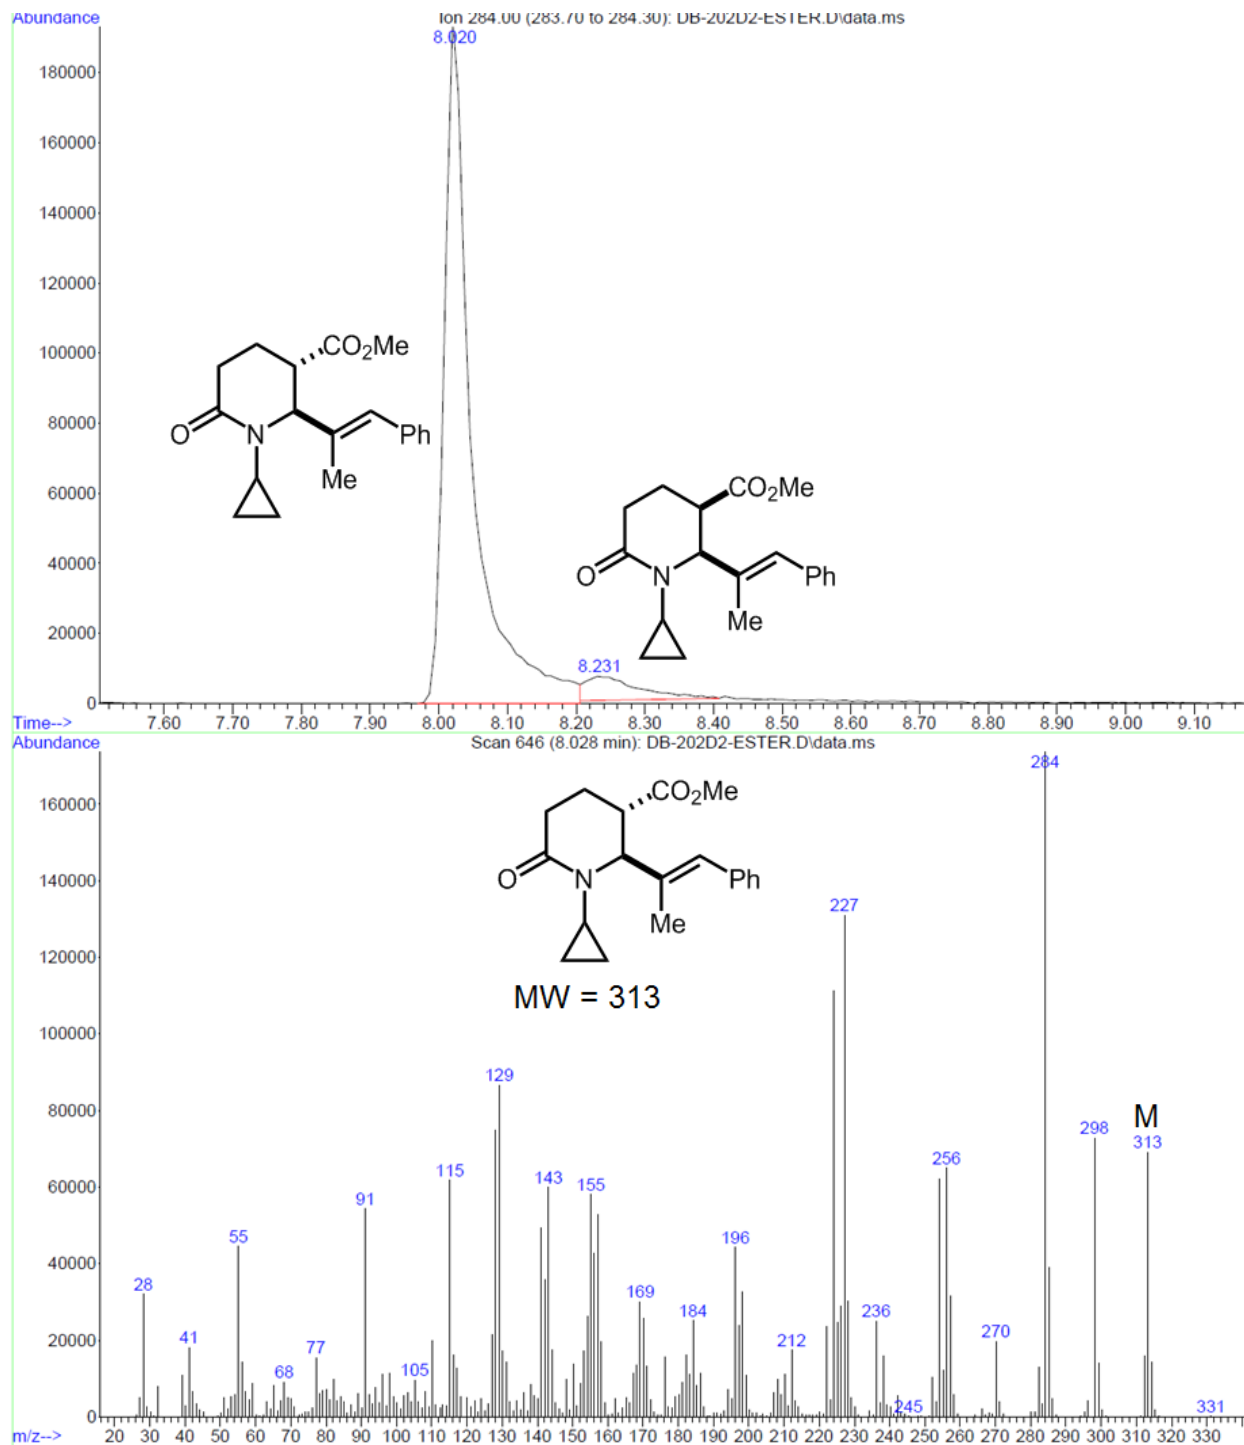

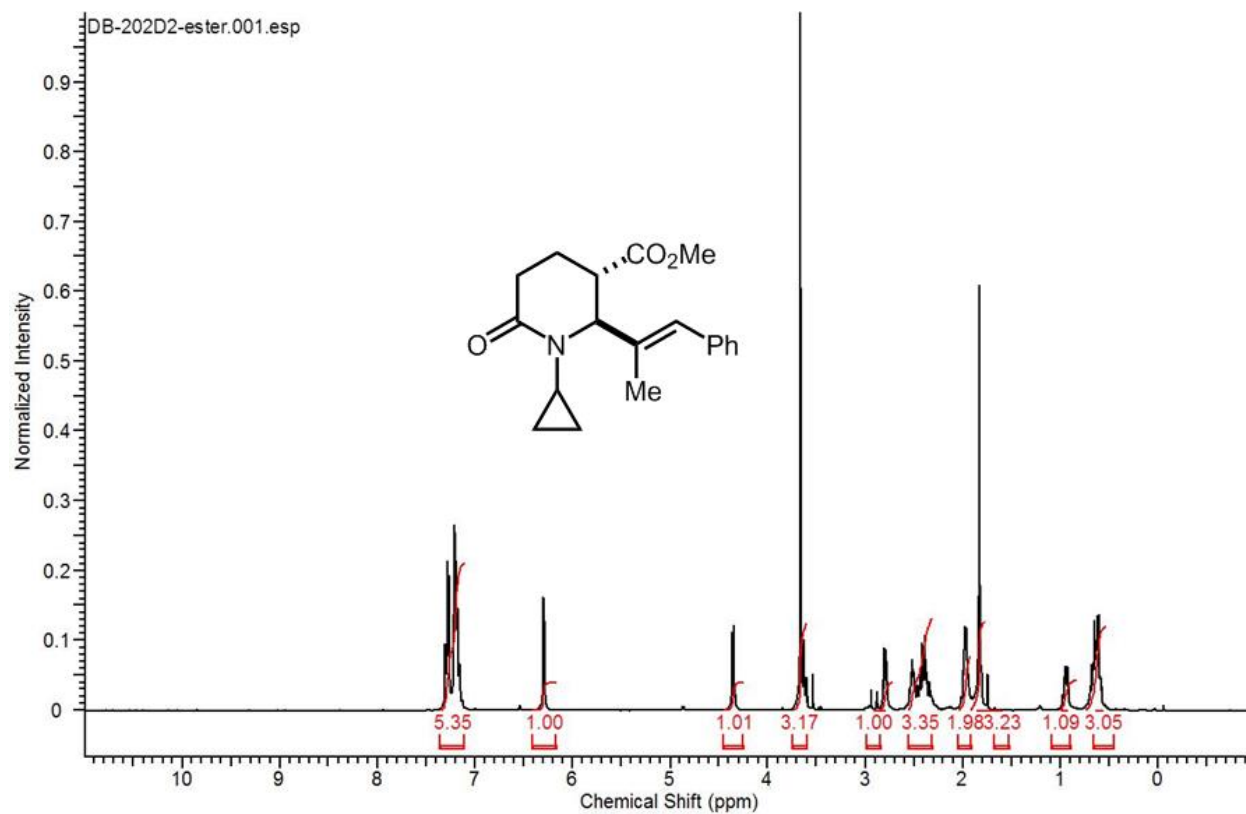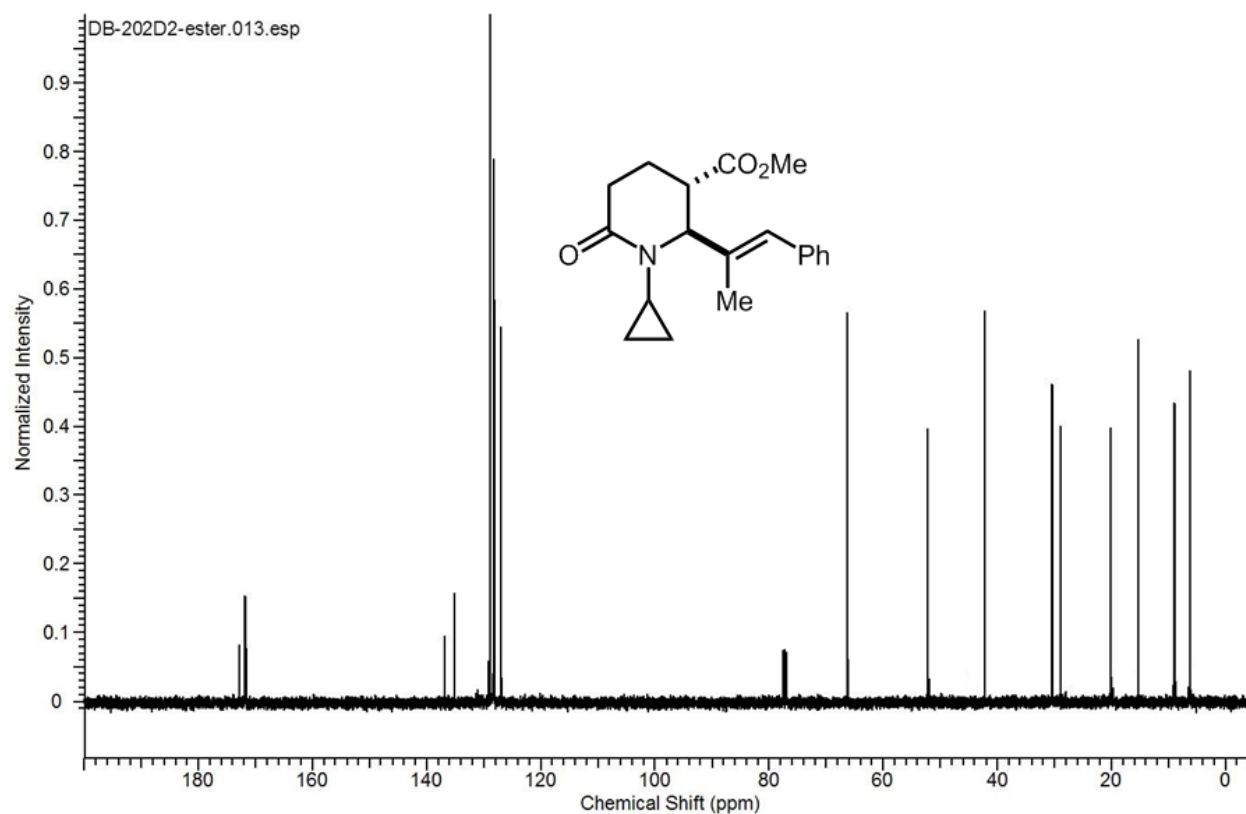

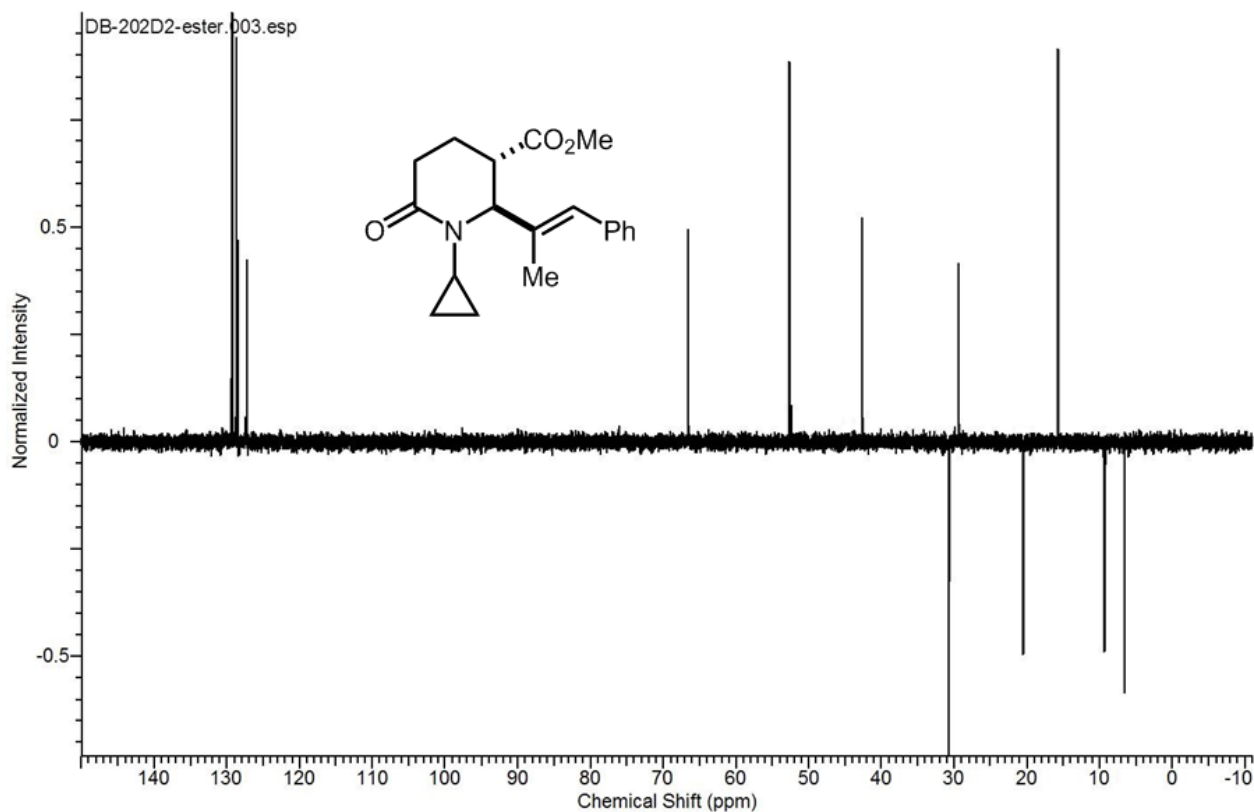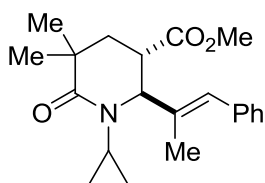**7n2**

Prepared from imine **4l** (185 mg, 1.0 mmol) and 2,2-dimethyl glutaric anhydride (142 mg, 1.0 equiv), using General Procedures B and C. Temp = 100 °C, time = 18 h. Purification: Flash chromatography on silica eluting with hexane/EtOAc (50:50 to 0:100). Yield = 239 mg, 70% over 2 steps, 98:2 dr.  $^1\text{H}$  NMR (400 MHz,  $\text{CDCl}_3$ )  $\delta$  7.38 to 7.21 (5H, m), 6.43 (1H, s), 4.37 (1H, d), 3.65 (3H, s), 2.89 to 2.86 (1H, m), 2.36 to 2.31 (1H, t), 1.89 to 1.77 (5H, m), 1.32 to 1.25 (6H, s,s), 0.91 to 0.87 (1H, m), 0.70 to 0.55 (3H, m).  $^{13}\text{C}$  NMR (101 MHz,  $\text{CDCl}_3$ )  $\delta$  178.0, 173.6, 137.0, 135.0, 129.7, 128.9, 128.4, 128.3, 128.2, 126.9, 68.0, 52.1, 40.8, 38.3, 37.0, 28.5, 28.1, 26.4, 13.6, 9.8, 7.2. **HRMS-EI $^+$**  ( $m/z$ ): calc'd for  $\text{C}_{21}\text{H}_{27}\text{NO}_3$  341.1991; found 341.1995.

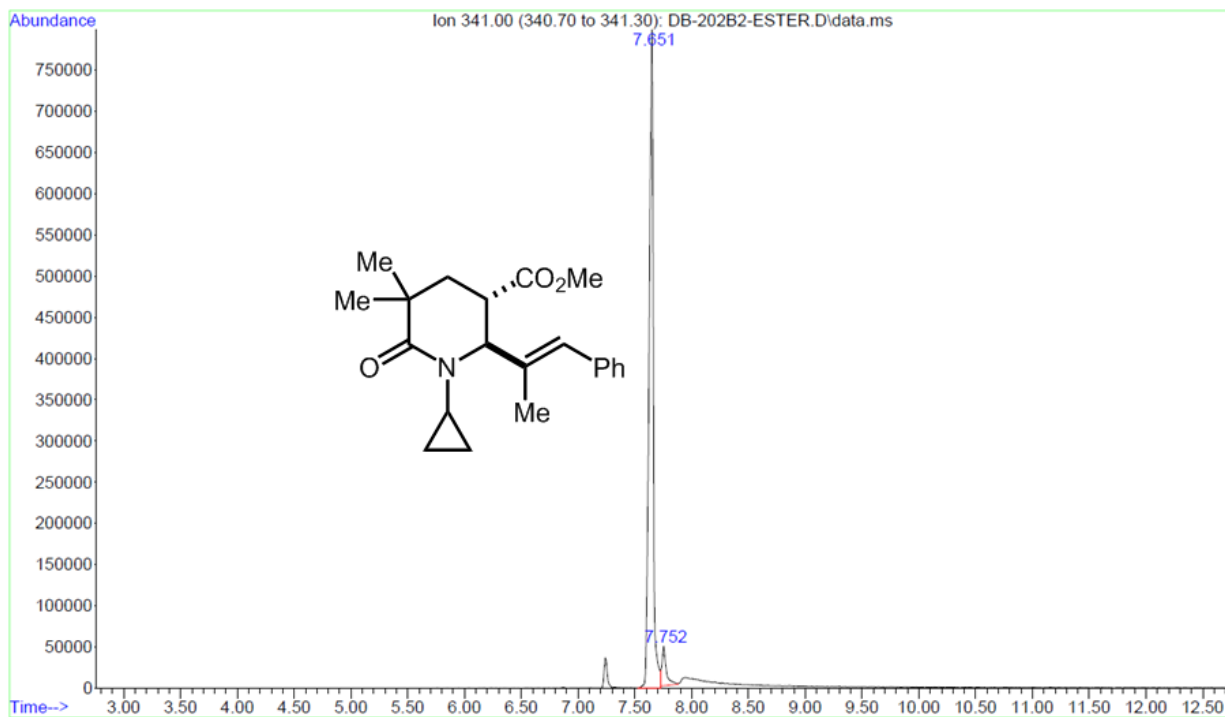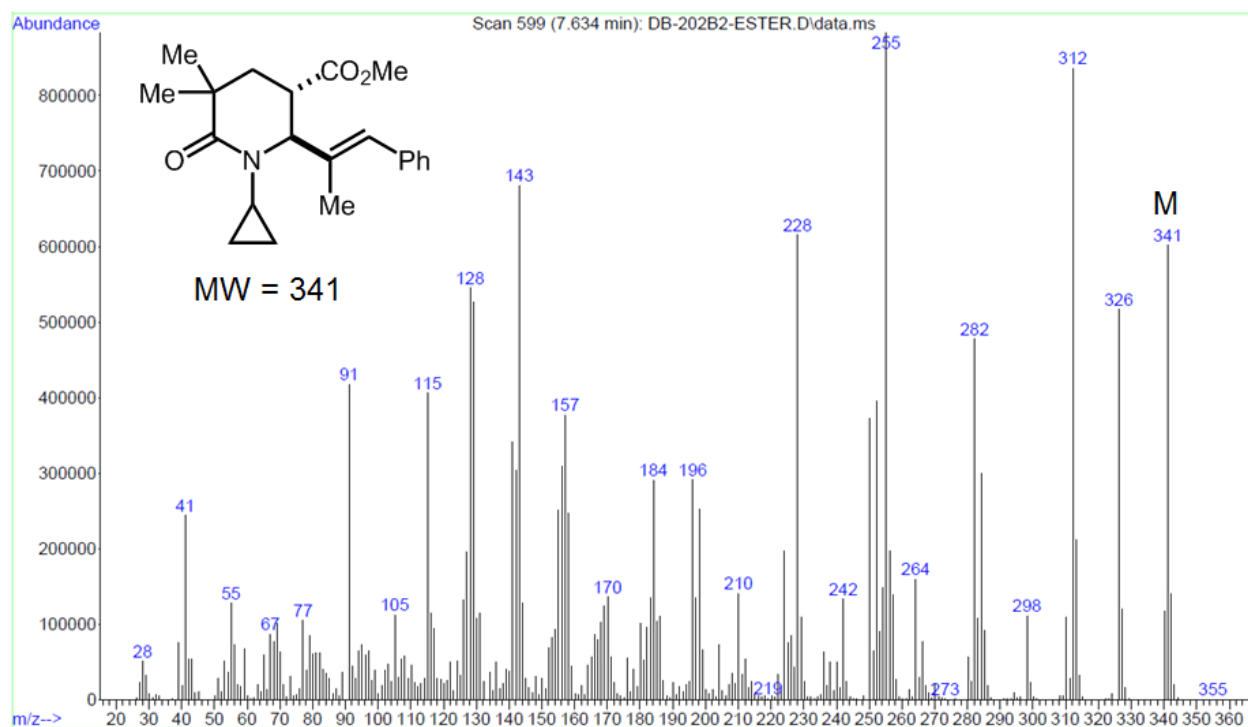

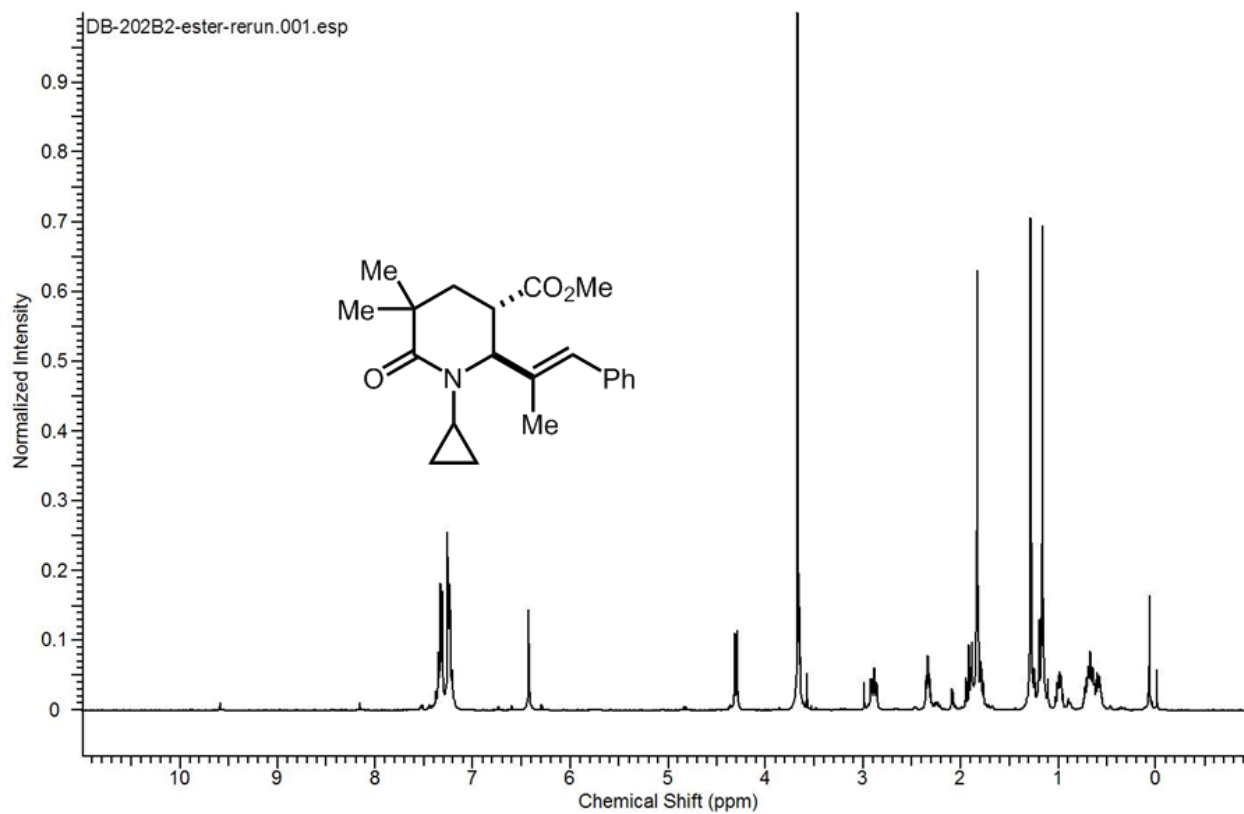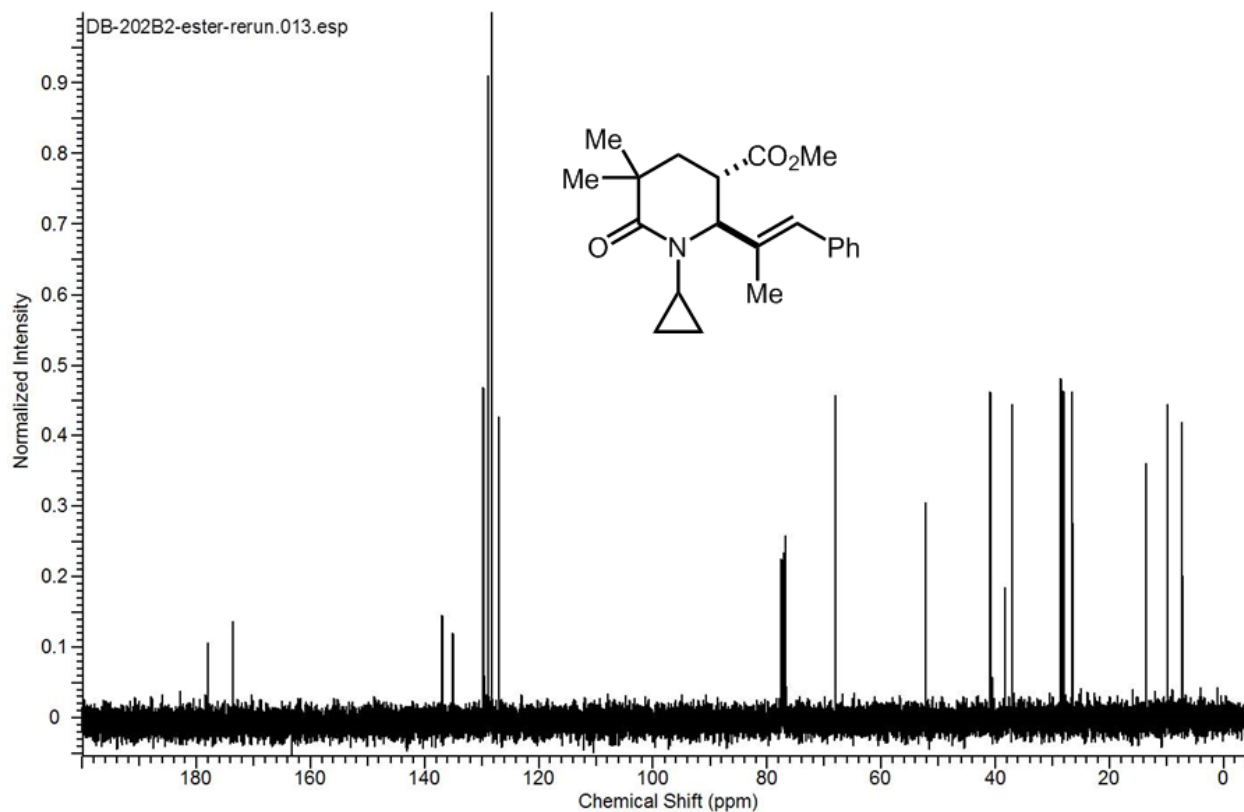

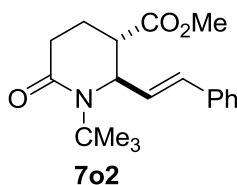

Prepared from imine **4n** (187 mg, 1.0 mmol) and glutaric anhydride (114 mg, 1.0 equiv), using General Procedures B and C. Temp = 100 °C, time = 12 h. Purification: Flash chromatography on silica eluting with hexane/EtOAc (50:50 to 0:100). Yield = 258 mg, 82% over 2 steps, 95:5 dr.  $^1\text{H}$  NMR (400 MHz,  $\text{CDCl}_3$ )  $\delta$  7.57 to 7.14 (5H, m), 6.52 to 6.49 (1H, d), 6.19 to 6.07 (1H, dd), 5.03 to 5.01 (1H, dd), 3.78 (3H, s), 2.92 to 2.81 (1H, m), 2.53 to 2.31 (2H, m), 2.15 to 1.90 (2H, m), 1.47 (9H, s).  $^{13}\text{C}$  NMR (101 MHz,  $\text{CDCl}_3$ )  $\delta$  172.7, 170.6, 136.0, 133.2, 129.1, 128.7, 128.1, 127.9, 126.4, 58.7, 58.2, 51.6, 44.7, 31.0, 28.5, 18.6. **HRMS- $\text{EI}^+$**  ( $m/z$ ): calc'd for  $\text{C}_{19}\text{H}_{25}\text{NO}_3$  315.1834; found 315.1839.

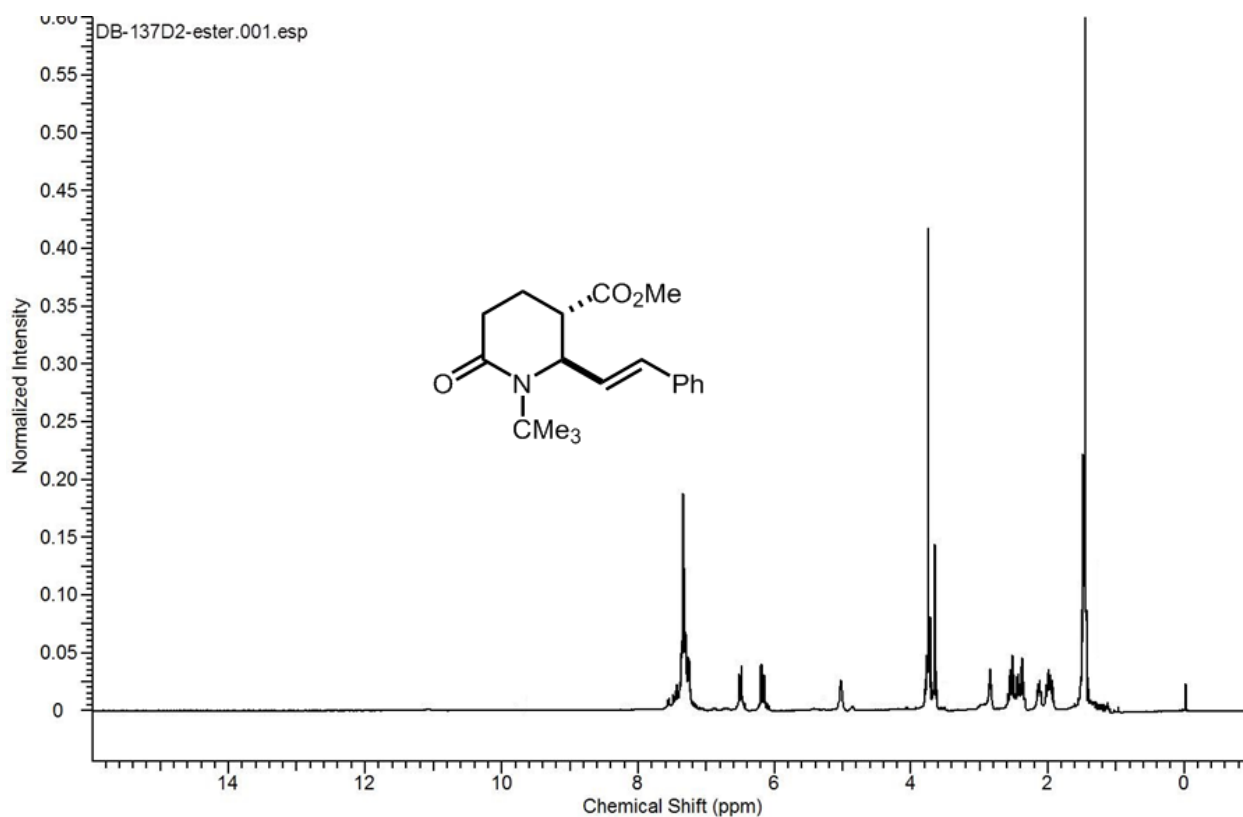



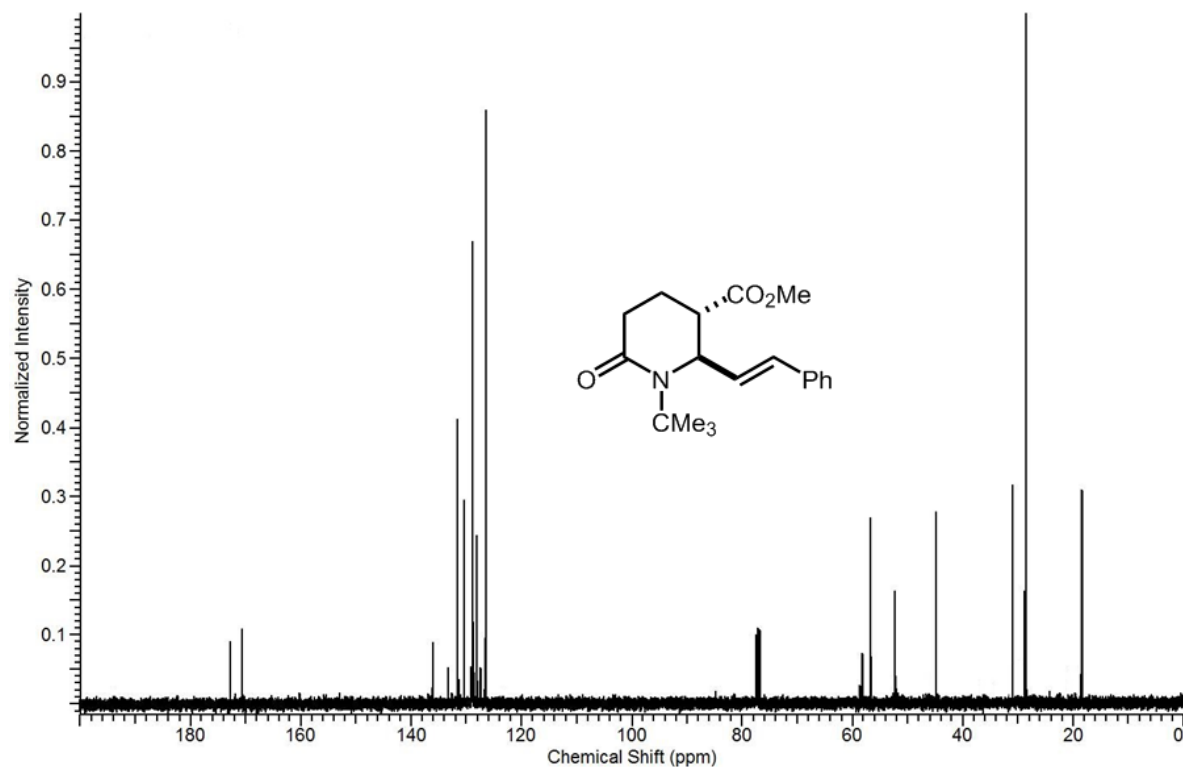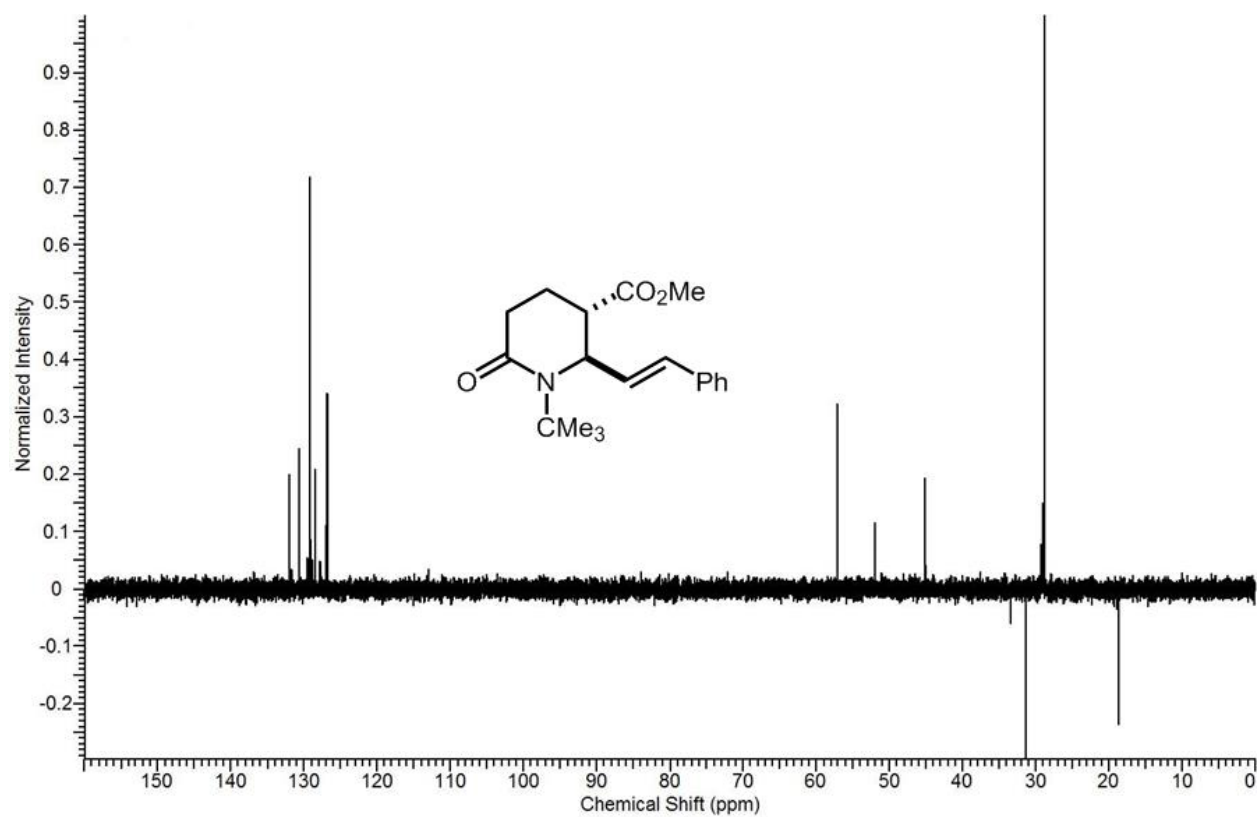

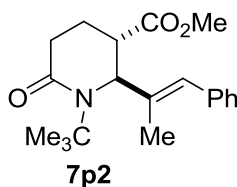

Prepared from imine **4o** (201 mg, 1.0 mmol) and glutaric anhydride (114 mg, 1.0 equiv), using General Procedures B and C. Temp = 100 °C, time = 18 h. Purification: Flash chromatography on silica eluting with hexane/EtOAc (50:50 to 0:100). Yield = 250 mg, 76% over 2 steps, 95:5 dr.  $^1\text{H}$  NMR (400 MHz,  $\text{CDCl}_3$ )  $\delta$  7.37 to 7.17 (5H, m), 6.39 (1H, s), 4.71 (1H, d), 3.76 (3H, s), 2.92 to 2.88 (1H, m), 2.55 to 2.32 (3H, m), 2.23 to 1.82 (4H, m), 1.49 (9H, s).  $^{13}\text{C}$  NMR (101 MHz,  $\text{CDCl}_3$ )  $\delta$  173.0, 170.5, 136.9, 129.0, 128.8, 128.2, 127.6, 127.2, 126.9, 62.3, 58.6, 55.3, 41.7, 31.1, 28.8, 19.4, 17.9. **HRMS-ESI<sup>+</sup>** ( $m/z$ ): calc'd for  $\text{C}_{20}\text{H}_{27}\text{NO}_3$  329.1991; found 329.1995.

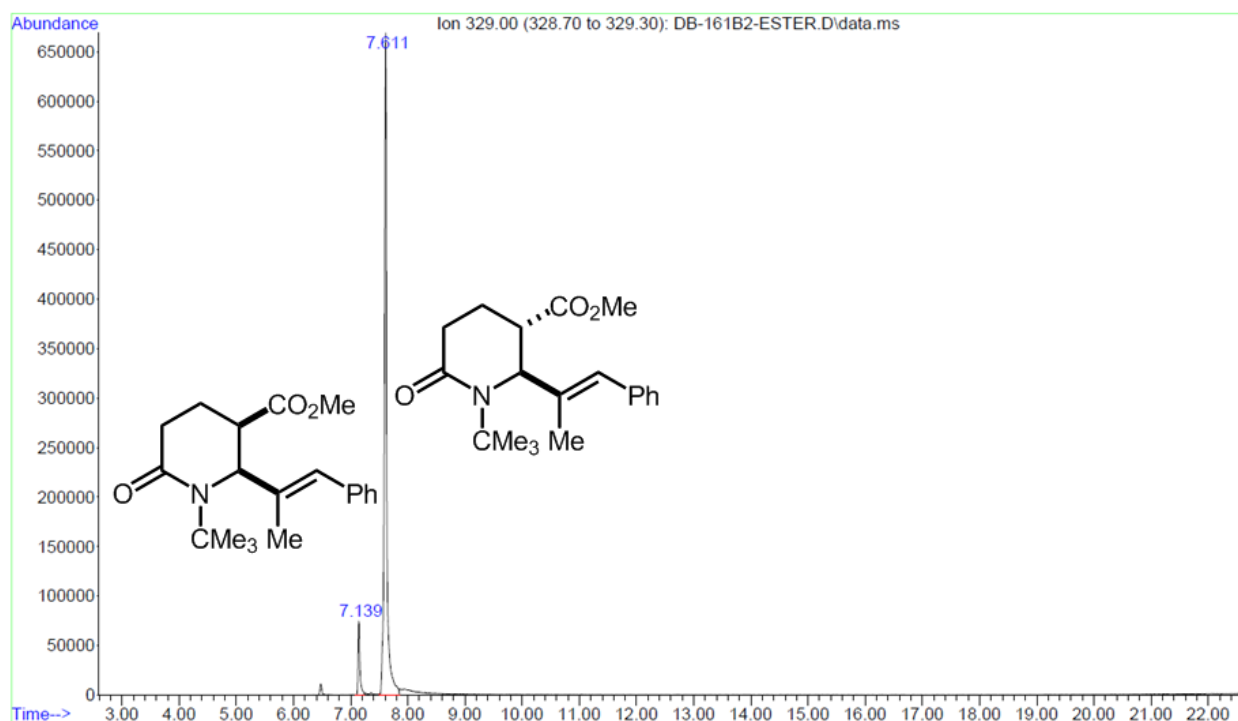

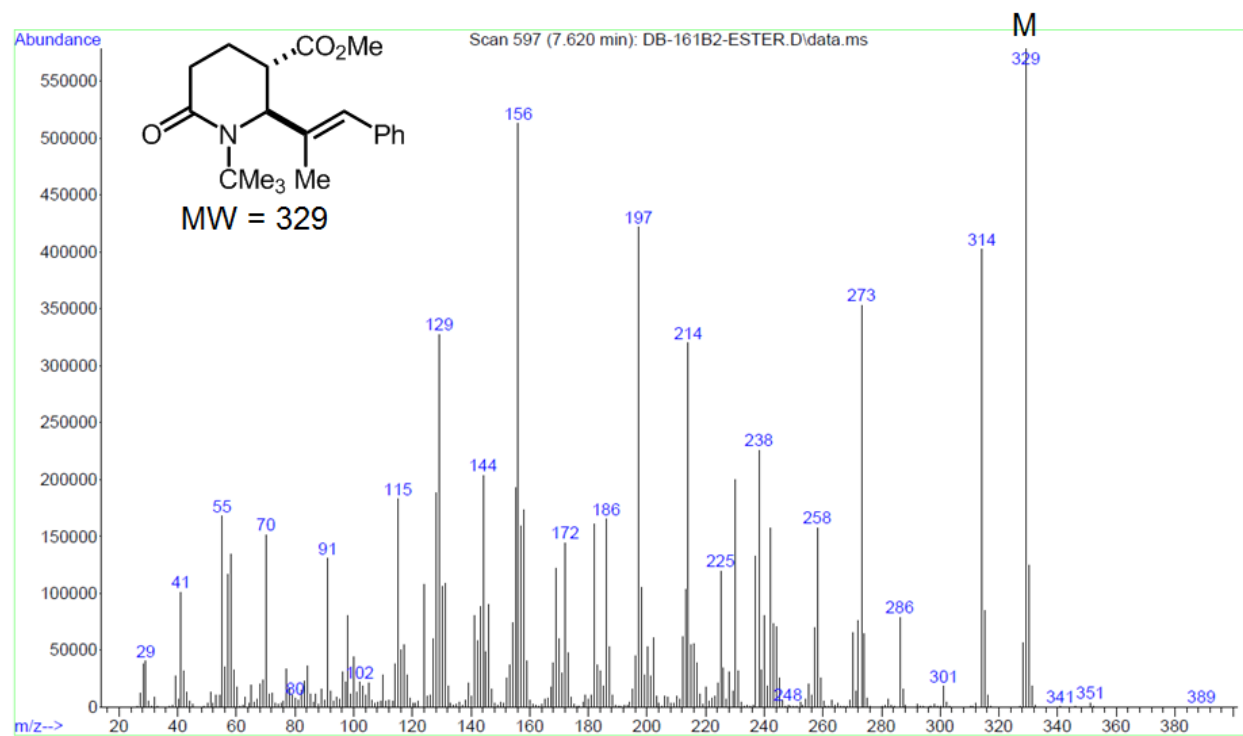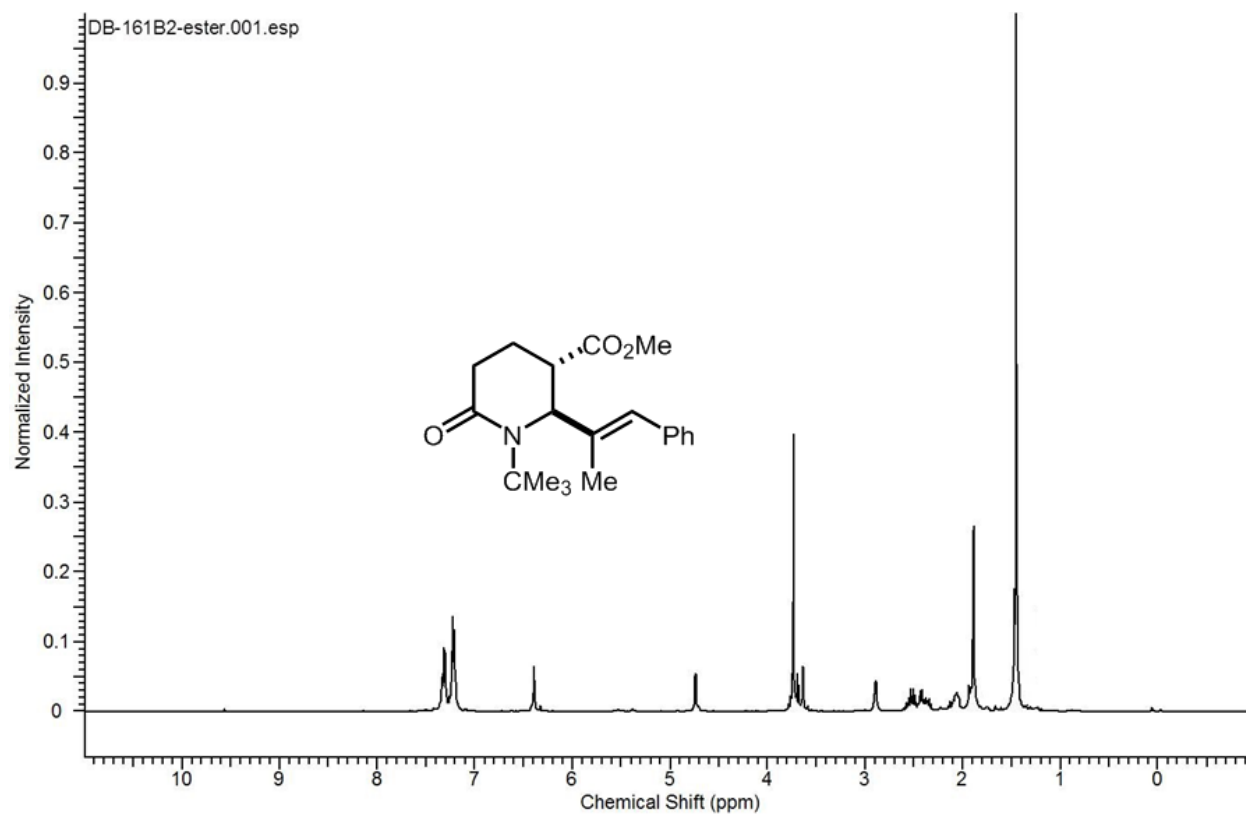

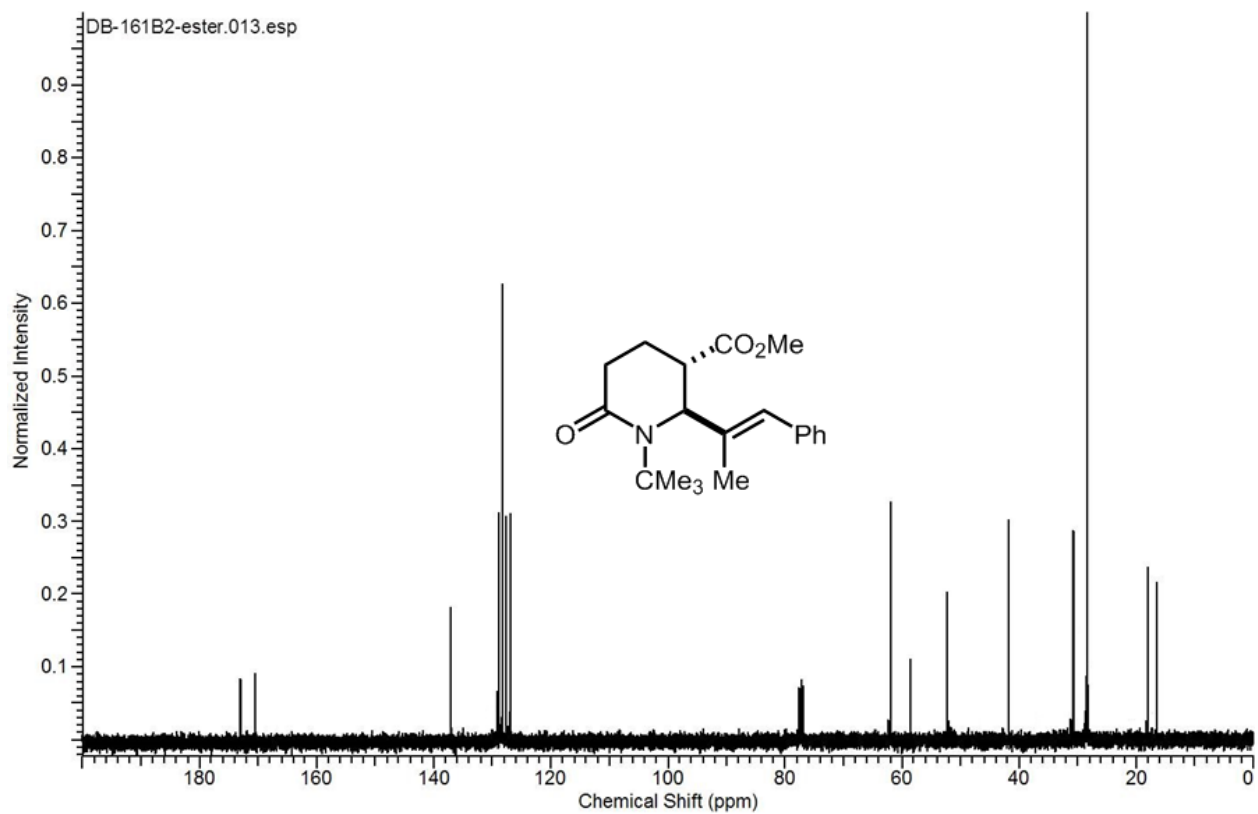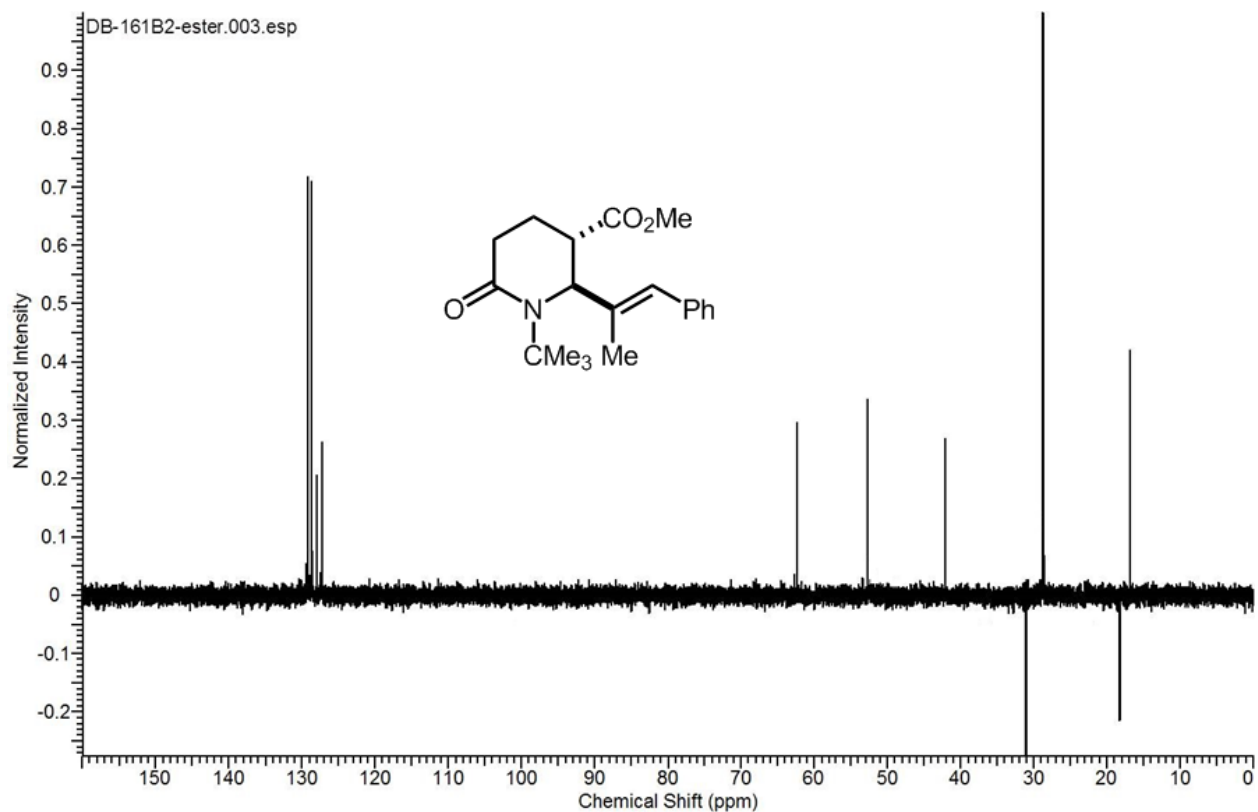

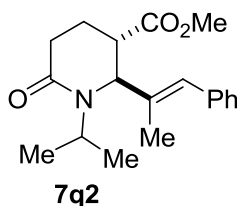

Prepared from imine **4q** (187 mg, 1.0 mmol) and glutaric anhydride (114 mg, 1.0 equiv), using General Procedures B and C. Temp = 100 °C, time = 18 h. Purification: Flash chromatography on silica eluting with hexane/EtOAc (50:50 to 0:100). Yield = 250 mg, 76% over 2 steps, 90:10 dr.  $^1\text{H}$  NMR (400 MHz,  $\text{CDCl}_3$ )  $\delta$  7.37 to 7.21 (5H, m), 6.39 (1H, s), 4.55 to 4.37 (2H, m), 3.77 (3H, s), 2.88 to 2.82 (1H, m), 2.63 to 2.37 (2H, m), 2.08 to 1.76 (5H, m), 1.41 to 1.26 (6H, m).  $^{13}\text{C}$  NMR (101 MHz,  $\text{CDCl}_3$ )  $\delta$  172.82, 170.14, 137.03, 136.84, 136.42, 129.88, 128.87, 127.88, 126.98, 125.56, 61.80, 55.02, 47.93, 41.67, 30.38, 20.95, 20.16, 19.52, 18.86. **HRMS- $\text{EI}^+$**  ( $m/z$ ): calc'd for  $\text{C}_{19}\text{H}_{25}\text{NO}_3$  315.1834; found 315.1839.

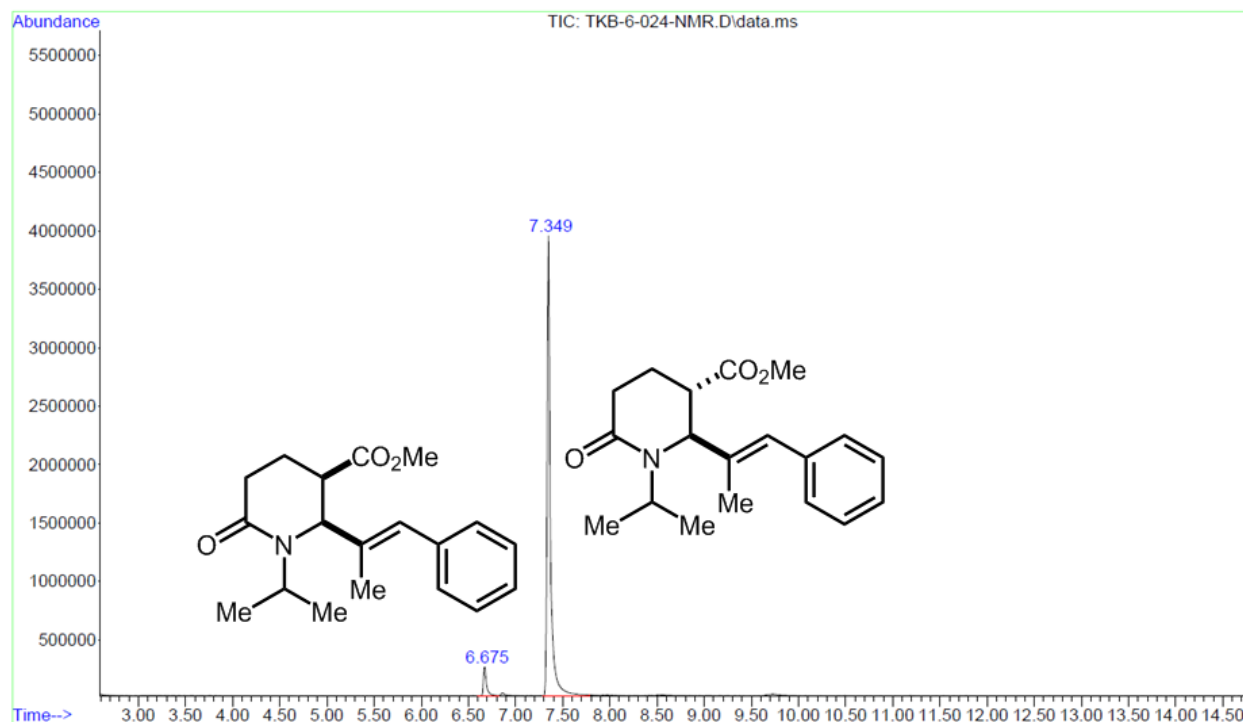

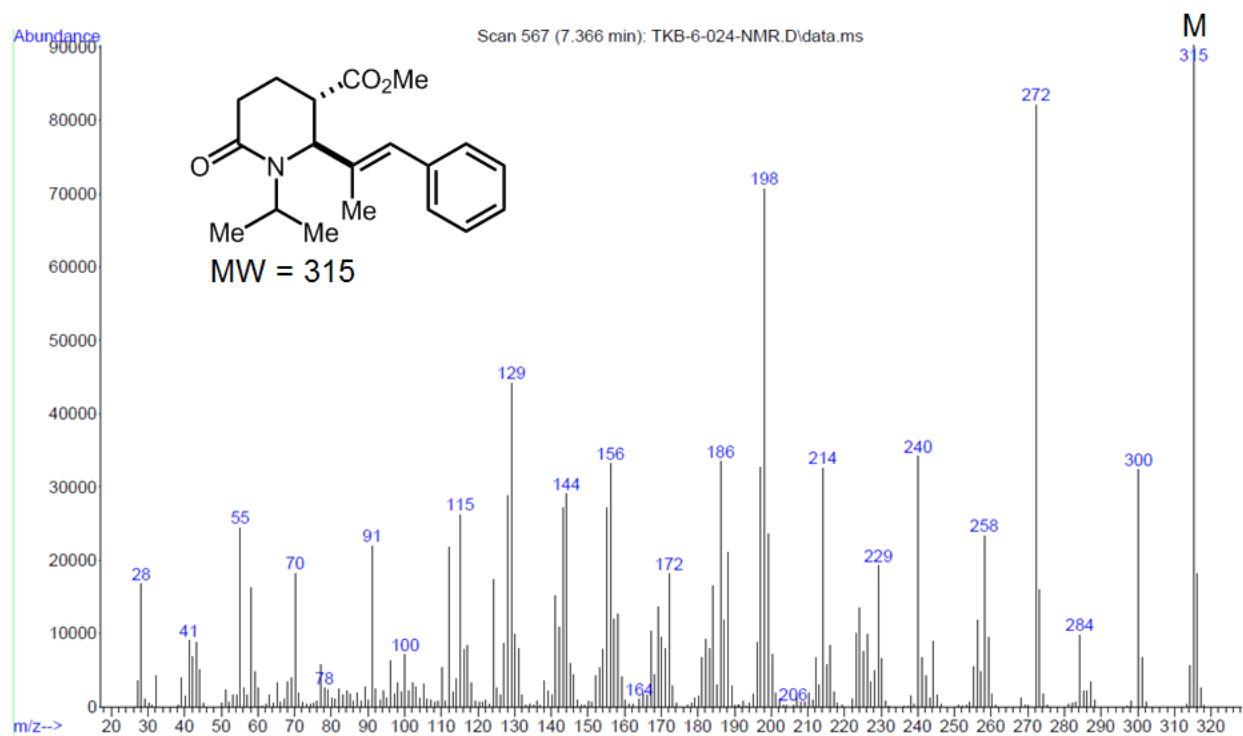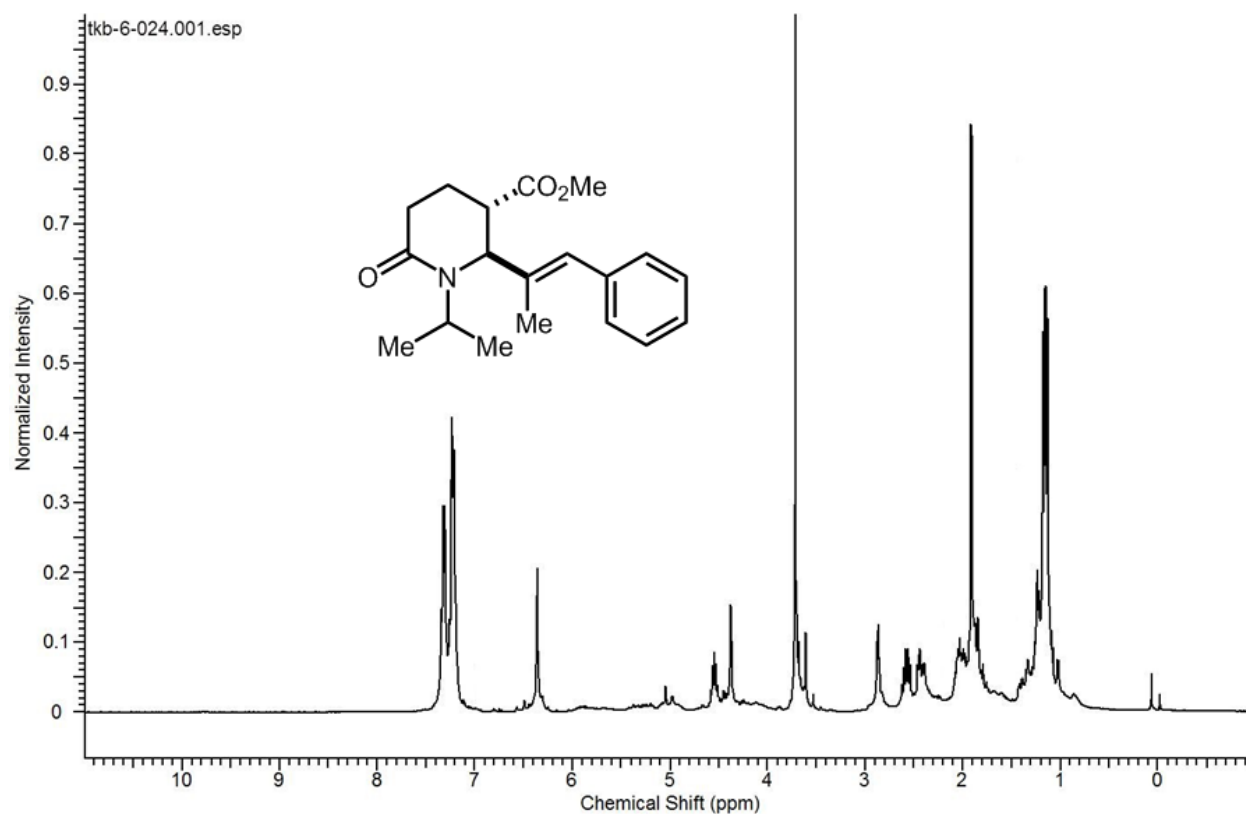

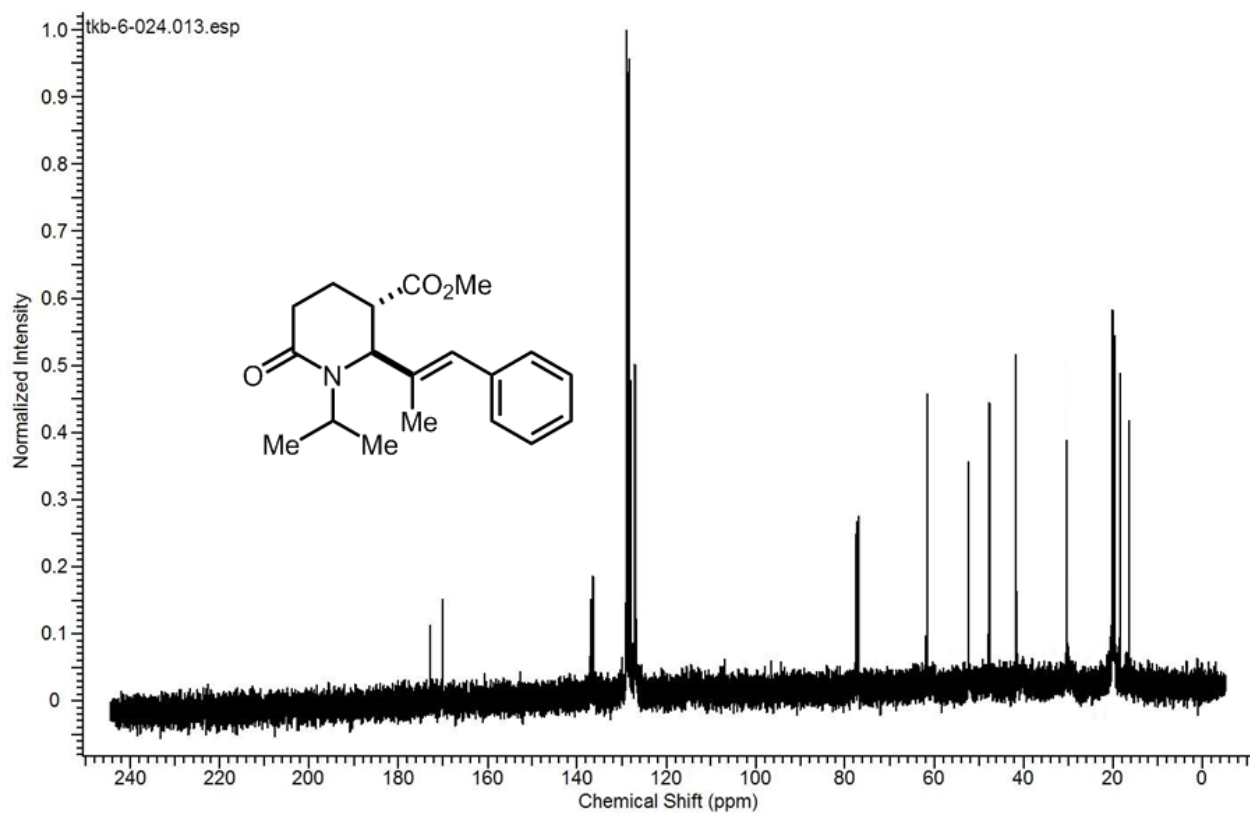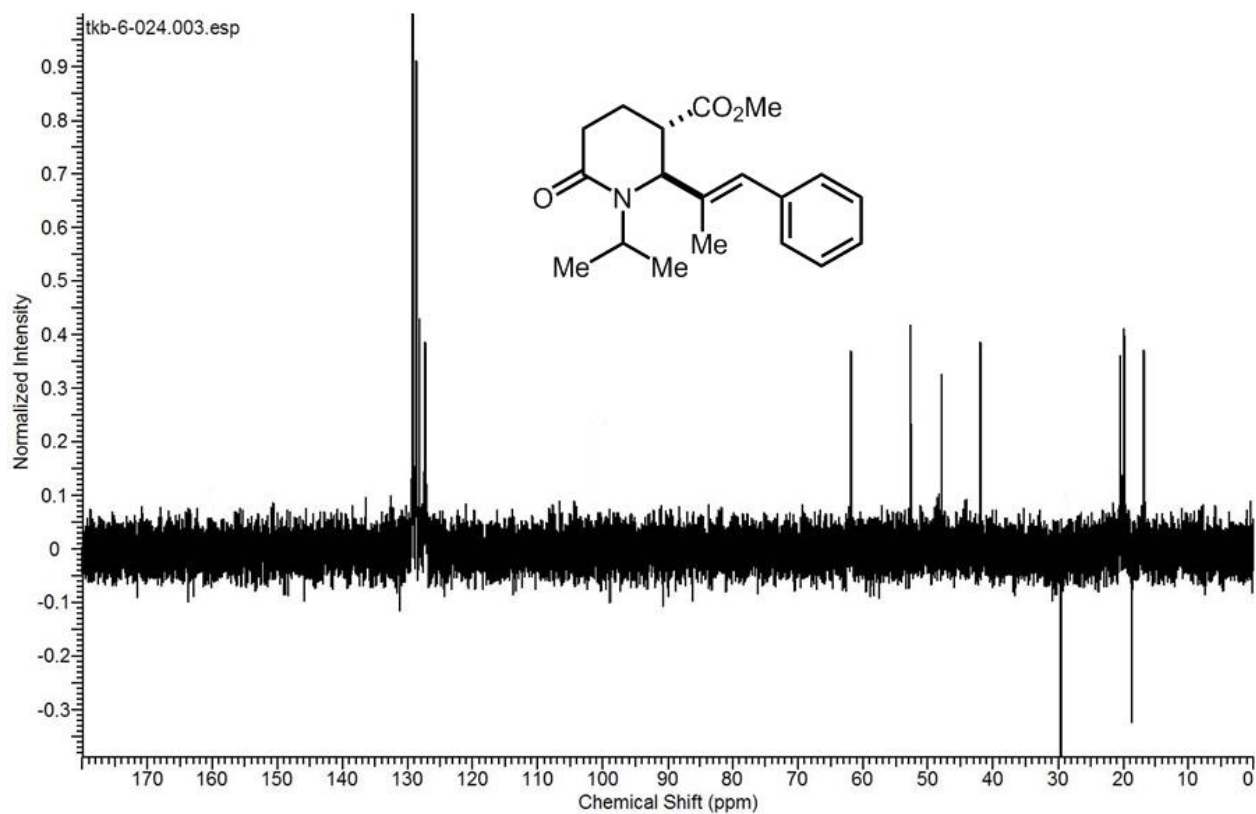

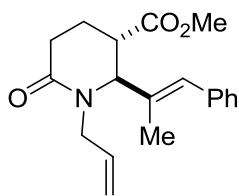**7r2**

Prepared from imine **4v** (185 mg, 1.0 mmol) and glutaric anhydride (114 mg, 1.0 equiv), using General Procedures B and C. Temp = 100 °C, time = 18 h. Purification: Flash chromatography on silica eluting with hexane/EtOAc (50:50 to 0:100). Yield = 235 mg, 75% over 2 steps, 95:5 dr.  $^1\text{H}$  NMR (400 MHz,  $\text{CDCl}_3$ )  $\delta$  7.38 to 7.02 (5H, m), 6.34 (1H, s), 5.82 to 5.72 (1H, m), 5.13 to 5.05 (2H, m), 4.75 to 4.70 (1H, dd), 4.38 (1H, d), 3.72 to 3.60 (4H, m), 3.28 to 3.21 (1H, dd), 2.87 to 2.80 (1H, m), 2.49 to 2.20 (2H, m), 2.03 to 1.69 (5H, m).  $^{13}\text{C}$  NMR (101 MHz,  $\text{CDCl}_3$ )  $\delta$  172.8, 169.6, 136.7, 134.4, 132.7, 129.1, 128.9, 128.3, 127.0, 118.0, 65.2, 52.2, 46.3, 42.6, 30.1, 21.0, 16.1. **HRMS- $\text{EI}^+$**  ( $m/z$ ): calc'd for  $\text{C}_{19}\text{H}_{23}\text{NO}_3$  313.1678; found 313.1684.

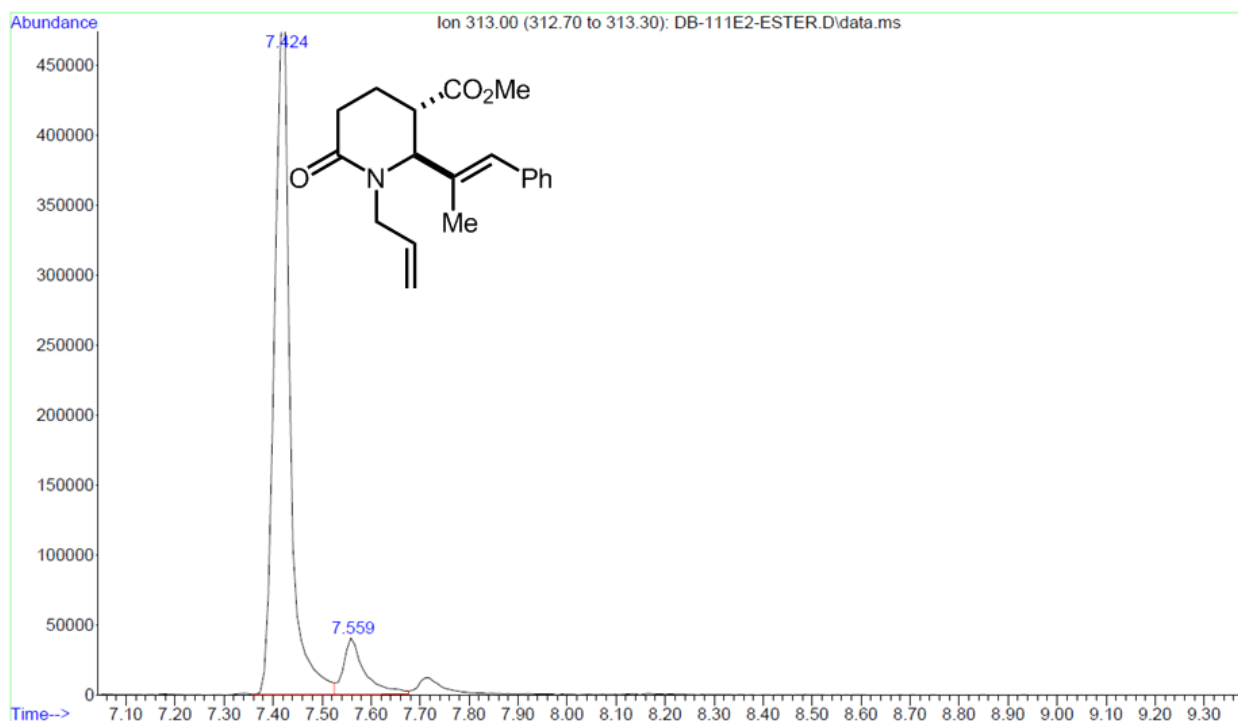



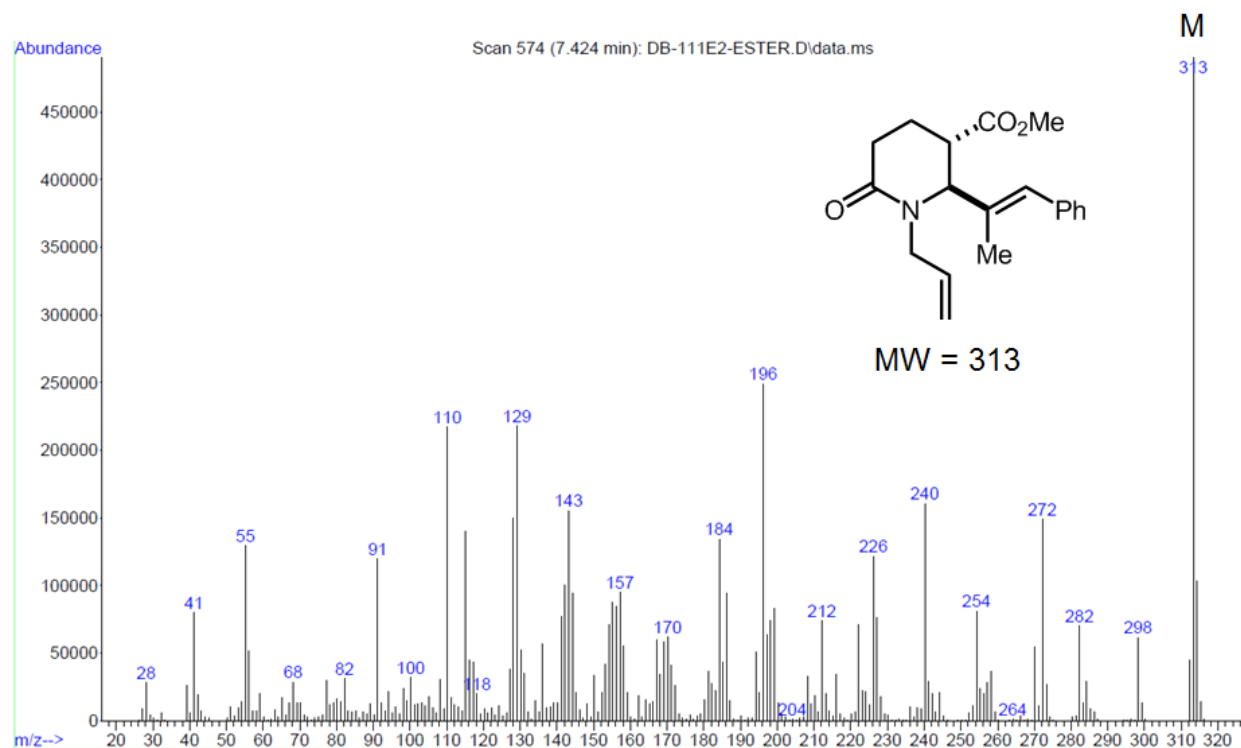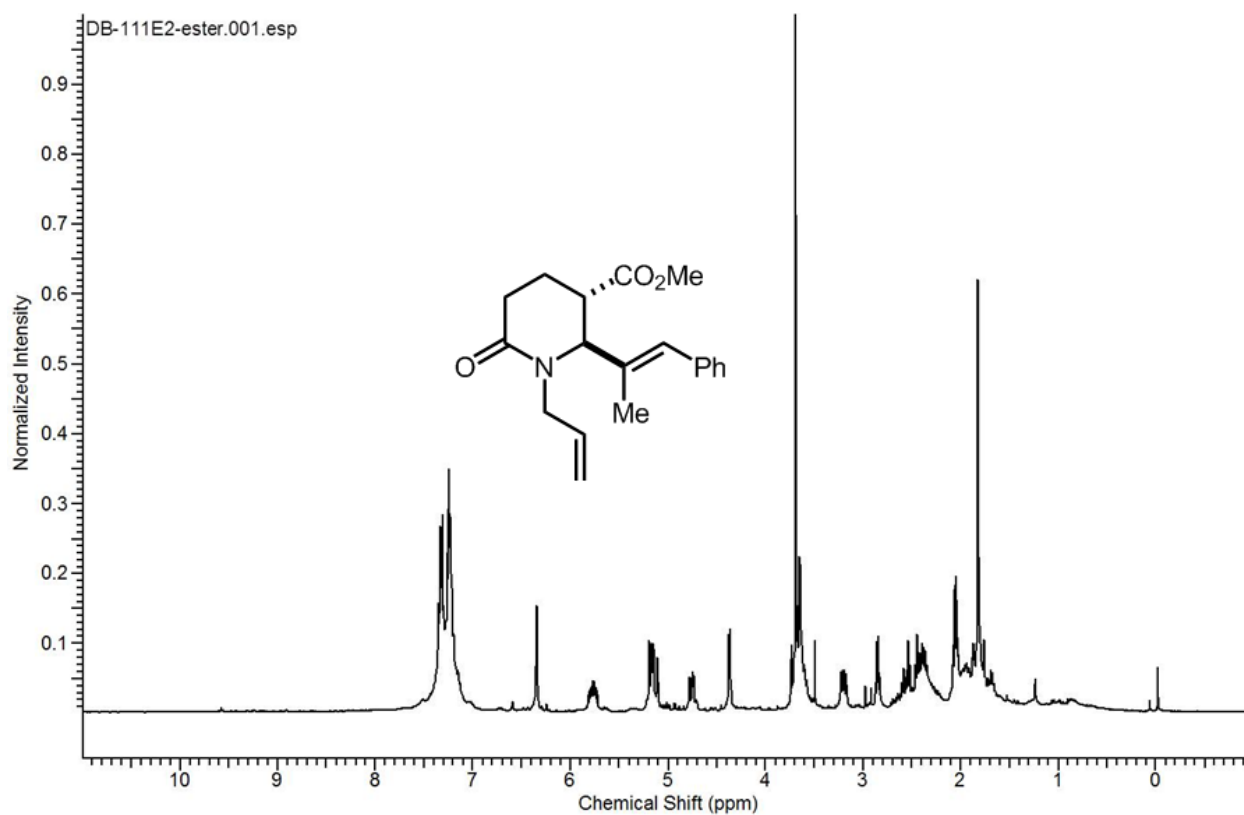

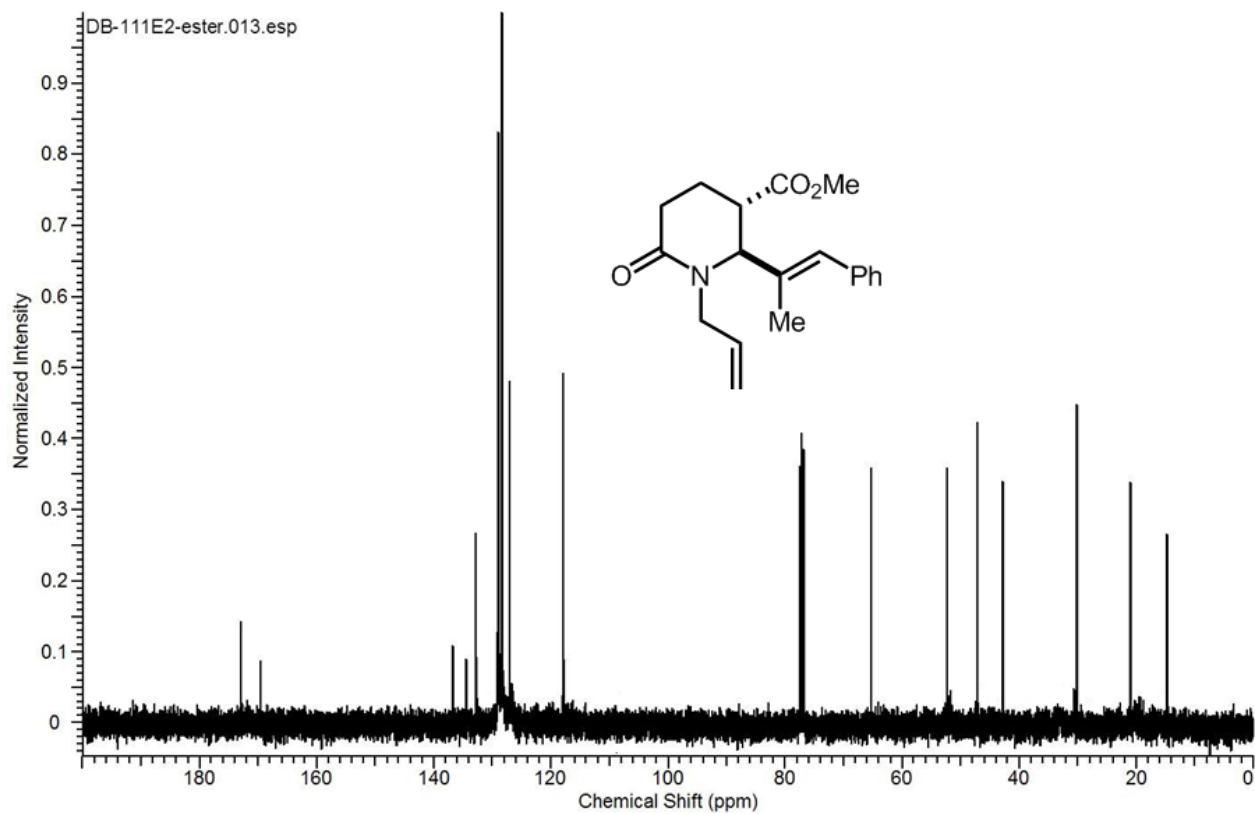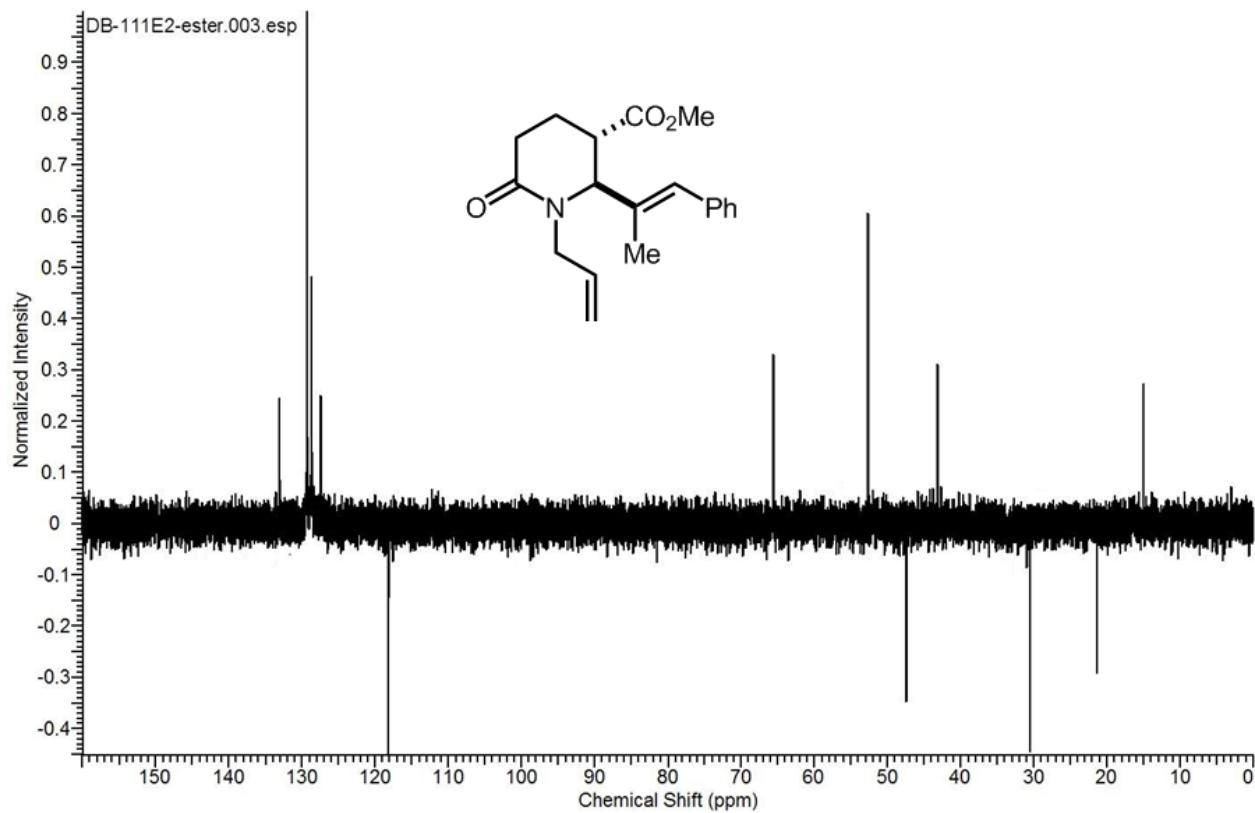

**Epoxidation:**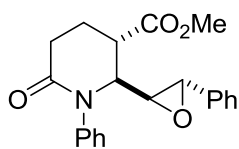**11a**, 88%, >99:1 dr

Prepared from allylic lactam **7a2** (0.50 mmol) using General Procedure F. Purification: Flash chromatography on silica eluting with hexane/EtOAc (50:50 to 0:100). Yield = 155 mg, 88%, >99:1 dr.  $^1\text{H}$  NMR (400 MHz,  $\text{CDCl}_3$ )  $\delta$  7.53 to 7.10 (8H, m), 6.91 to 6.86 (2H, d), 4.01 (1H, d), 3.81 (3H, s), 3.28 to 3.25 (1H, d), 3.17 to 3.15 (1H, dd), 2.69 to 2.35 (4H, m).  $^{13}\text{C}$  NMR (101 MHz,  $\text{CDCl}_3$ )  $\delta$  172.4, 168.4, 141.5, 135.5, 133.2, 129.7, 129.6, 129.3, 128.6, 128.5, 128.4, 128.0, 127.6, 125.3, 63.7, 61.9, 60.3, 52.7, 40.7, 29.5, 20.0. **HRMS- $\text{EI}^+$**  ( $m/z$ ): calc'd for  $\text{C}_{21}\text{H}_{21}\text{NO}_4$  351.1471; found 351.1475.

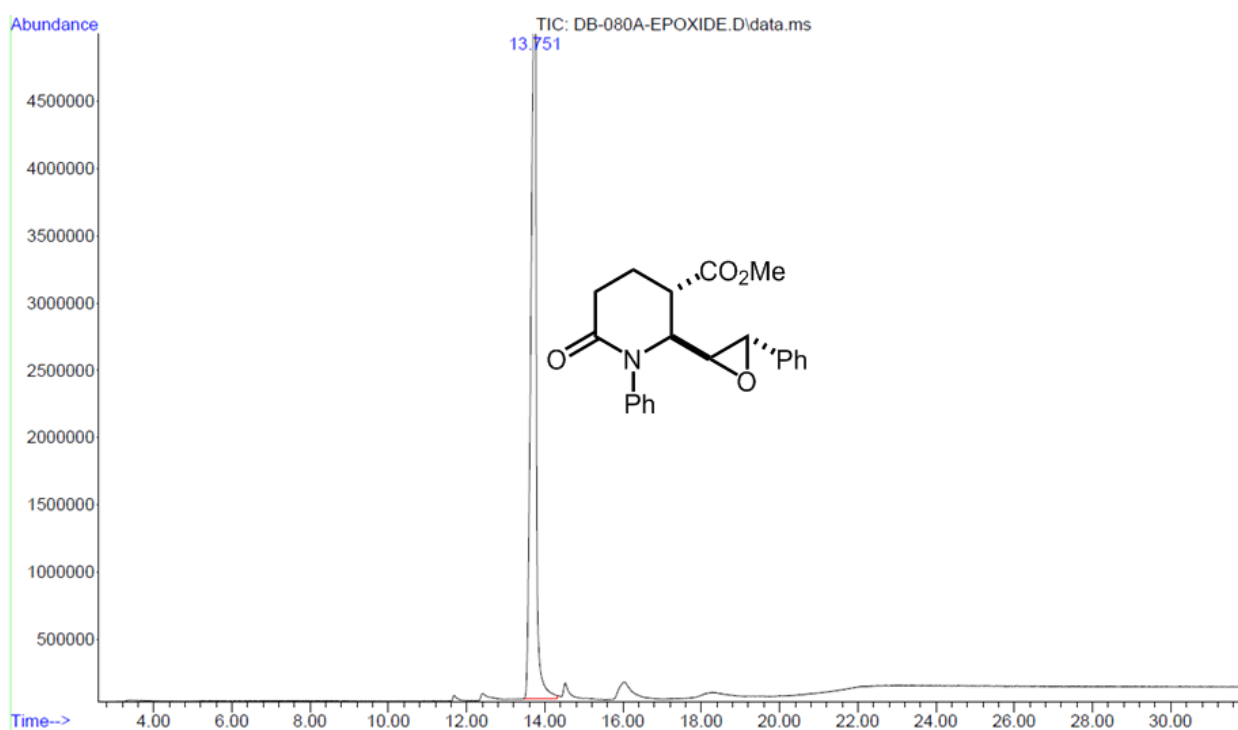

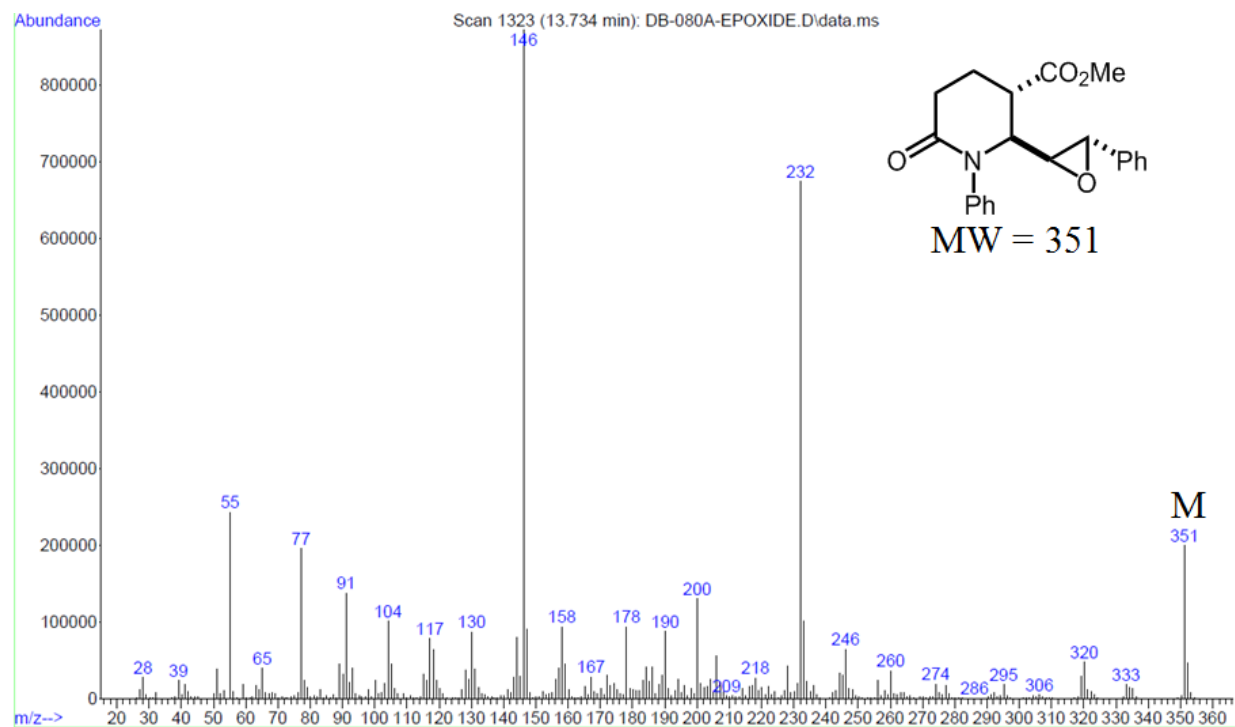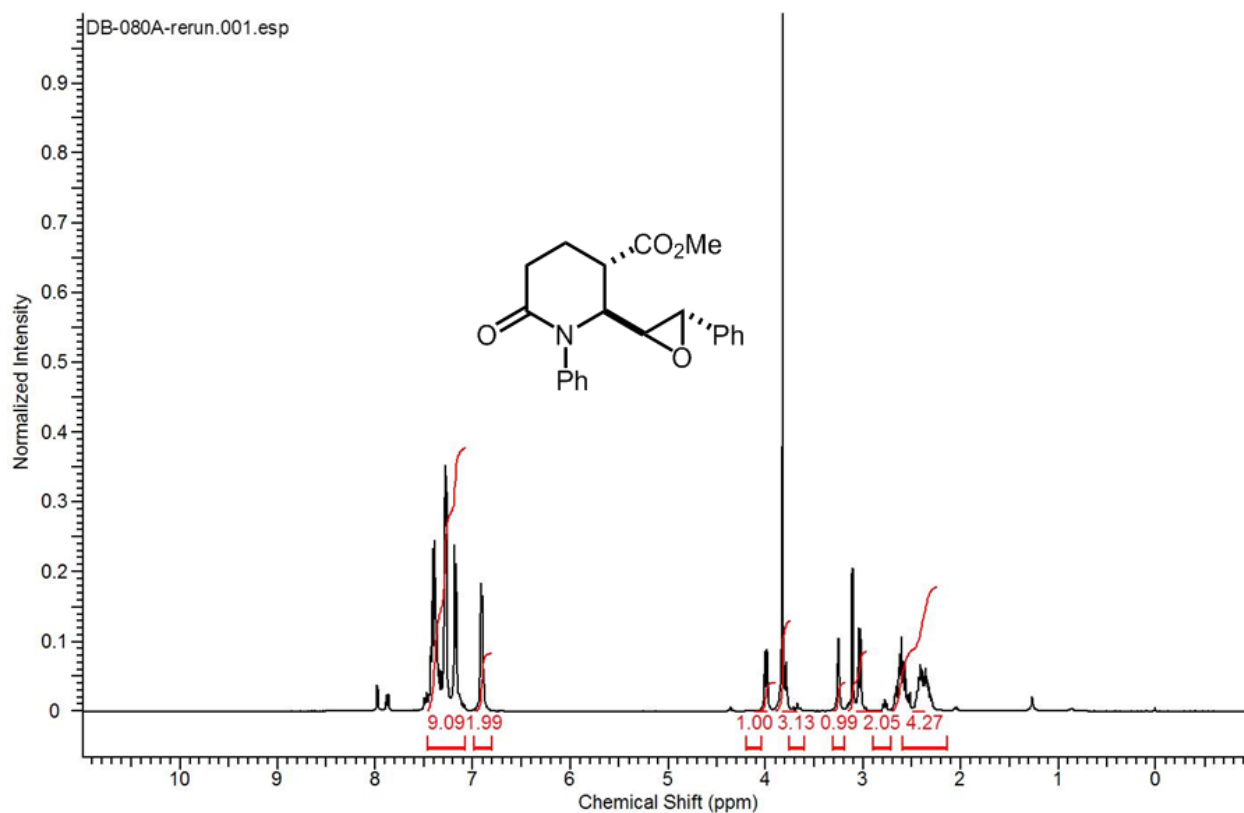

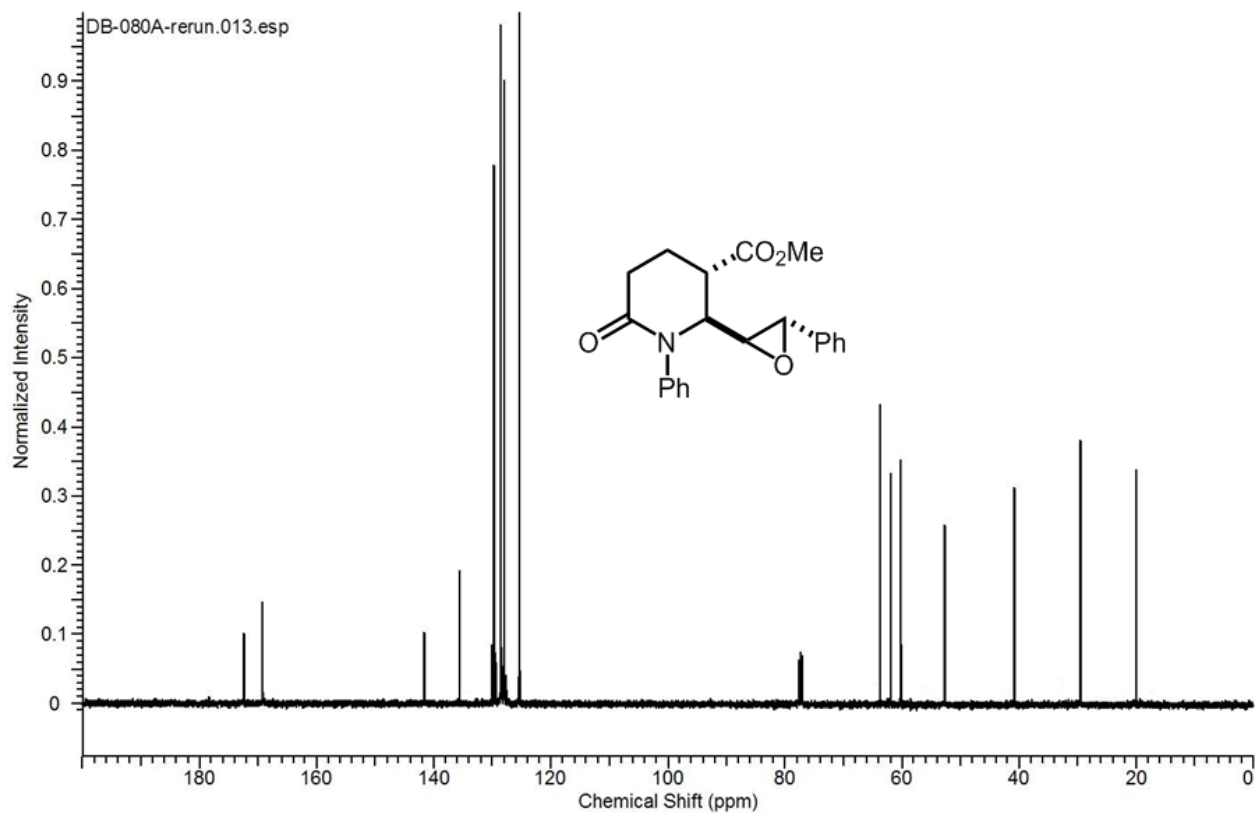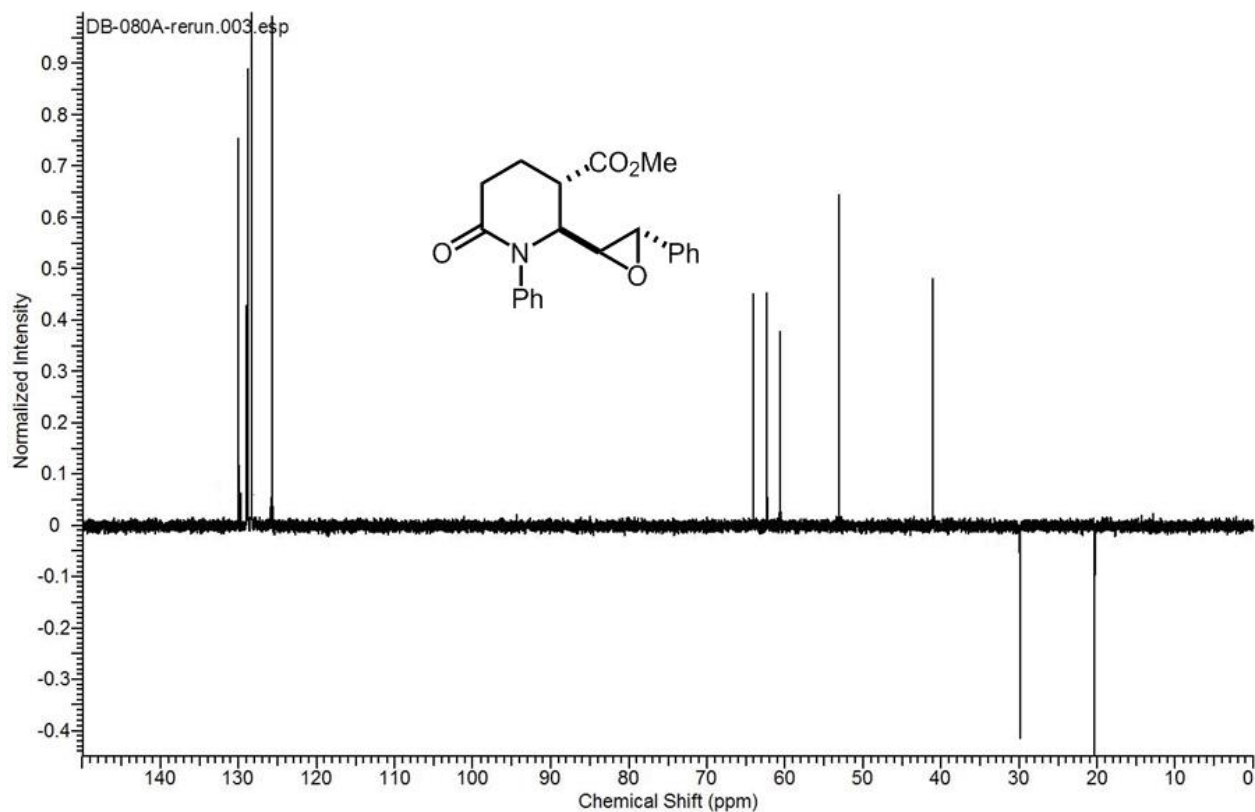

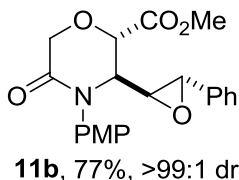

Prepared from allylic lactam **5c2** (0.50 mmol) using General Procedure F. Purification: Flash chromatography on silica eluting with hexane/EtOAc (25:75 to 0:100). Yield = 148 mg, 77%, 95:5 dr.  $^1\text{H}$  NMR (400 MHz,  $\text{CDCl}_3$ )  $\delta$  7.54 to 6.96 (9H, m), 4.87 (1H, d), 4.71 to 4.61 (1H, d), 4.52 to 4.28 (2H, m), 3.89 to 3.72 (6H, m), 3.35 to 3.31 (2H, m).  $^{13}\text{C}$  NMR (101 MHz,  $\text{CDCl}_3$ )  $\delta$  169.38, 165.97, 159.37, 136.43, 134.64, 129.84, 128.80, 126.86, 125.73, 114.98, 72.88, 65.11, 64.30, 63.32, 60.49, 59.63, 55.53. **HRMS- $\text{EI}^+$**  ( $m/z$ ): calc'd for  $\text{C}_{21}\text{H}_{21}\text{NO}_6$  383.1369; found 383.1366.

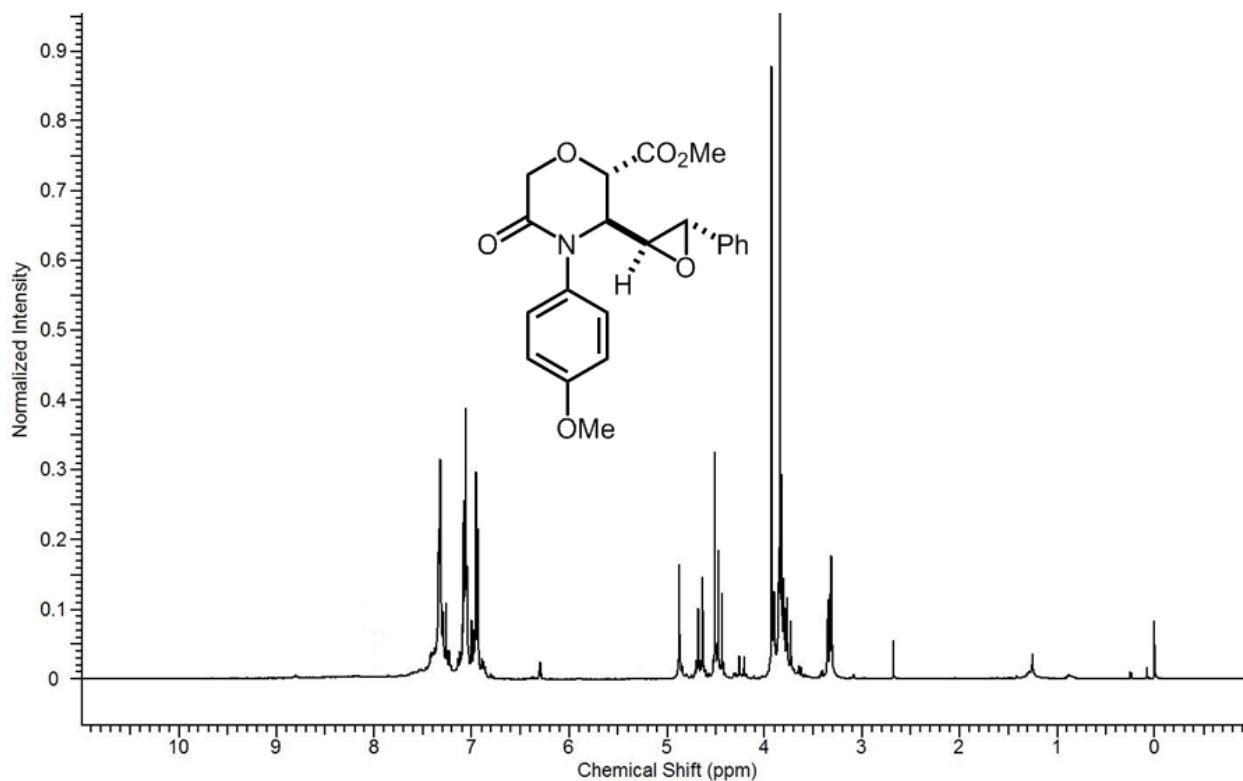

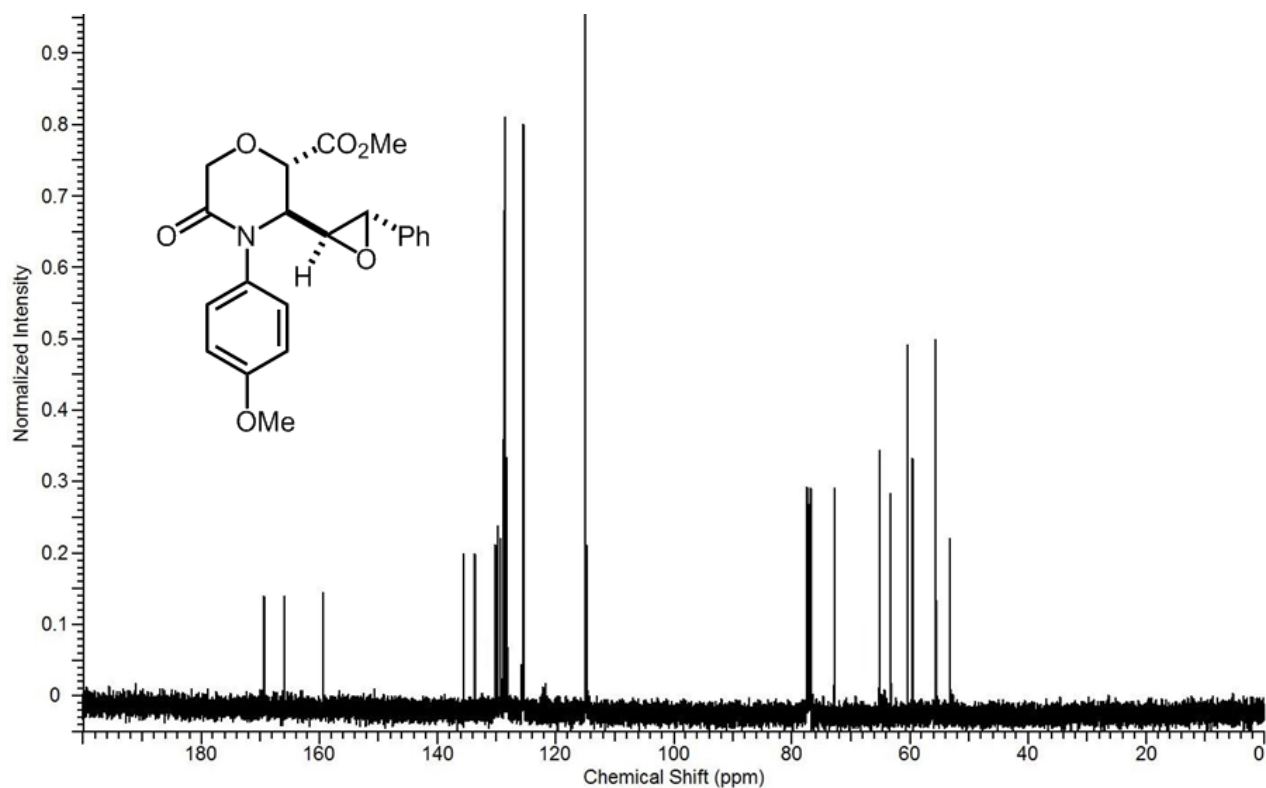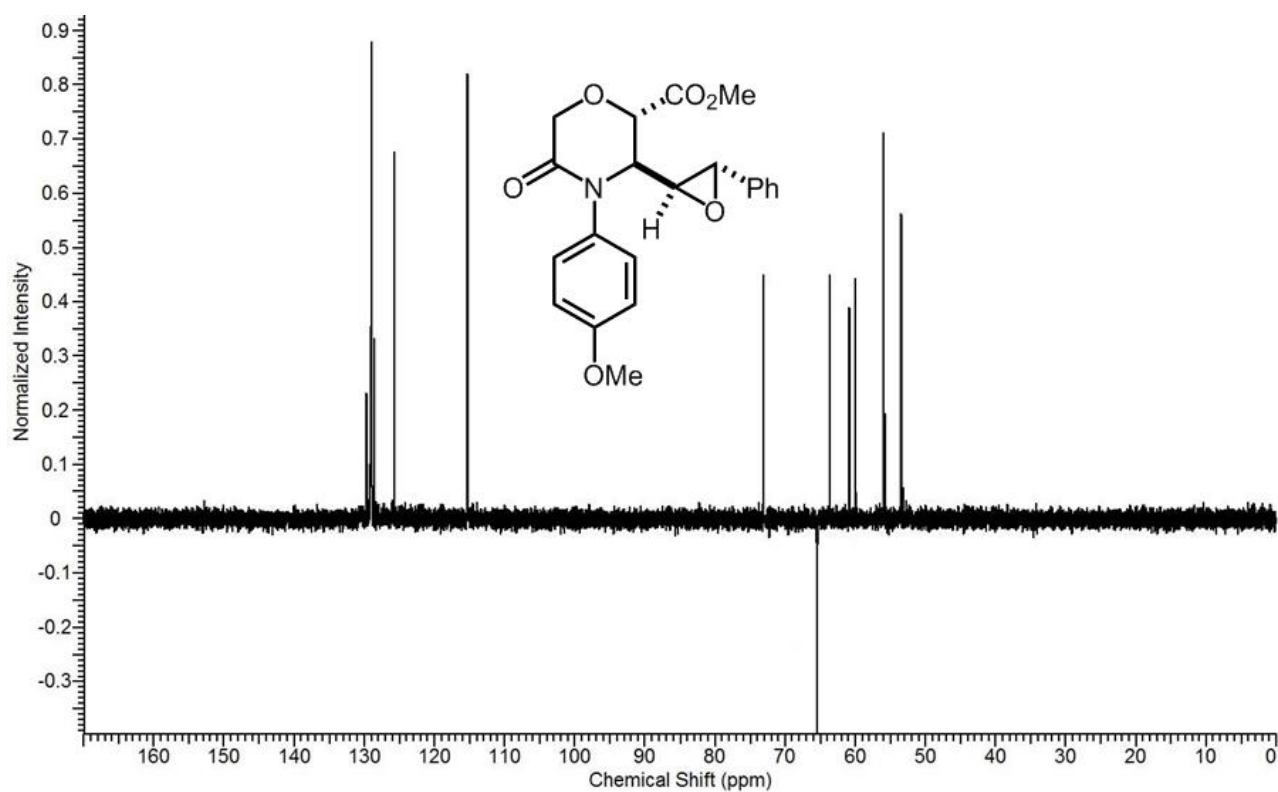

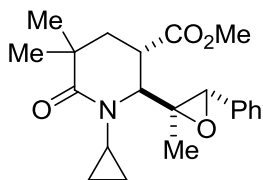**11c**, 84%, >99:1 dr

Prepared from allylic lactam **7n2** (0.50 mmol) using General Procedure F. Purification: Flash chromatography on silica eluting with hexane/EtOAc (25:75 to 0:100). Yield = 150 mg, 84%, 95:5 dr.  $^1\text{H}$  NMR (400 MHz,  $\text{CDCl}_3$ )  $\delta$  7.43 to 7.20 (5H, m), 4.17 (1H, s), 3.83 to 3.65 (5H, m), 3.13 to 3.03 (1H, m), 2.48 to 2.39 (1H, t), 1.89 to 1.80 (2H, m), 1.32 to 0.62 (10H, m).  $^{13}\text{C}$  NMR (101 MHz,  $\text{CDCl}_3$ )  $\delta$  179.1, 174.2, 131.3, 129.8, 128.3, 127.5, 126.2, 68.2, 65.1, 63.8, 52.6, 38.5, 38.2, 28.3, 25.2, 10.9, 7.9. **HRMS- $\text{EI}^+$**  ( $m/z$ ): calc'd for  $\text{C}_{21}\text{H}_{27}\text{NO}_4$  357.1940; found 357.1945.

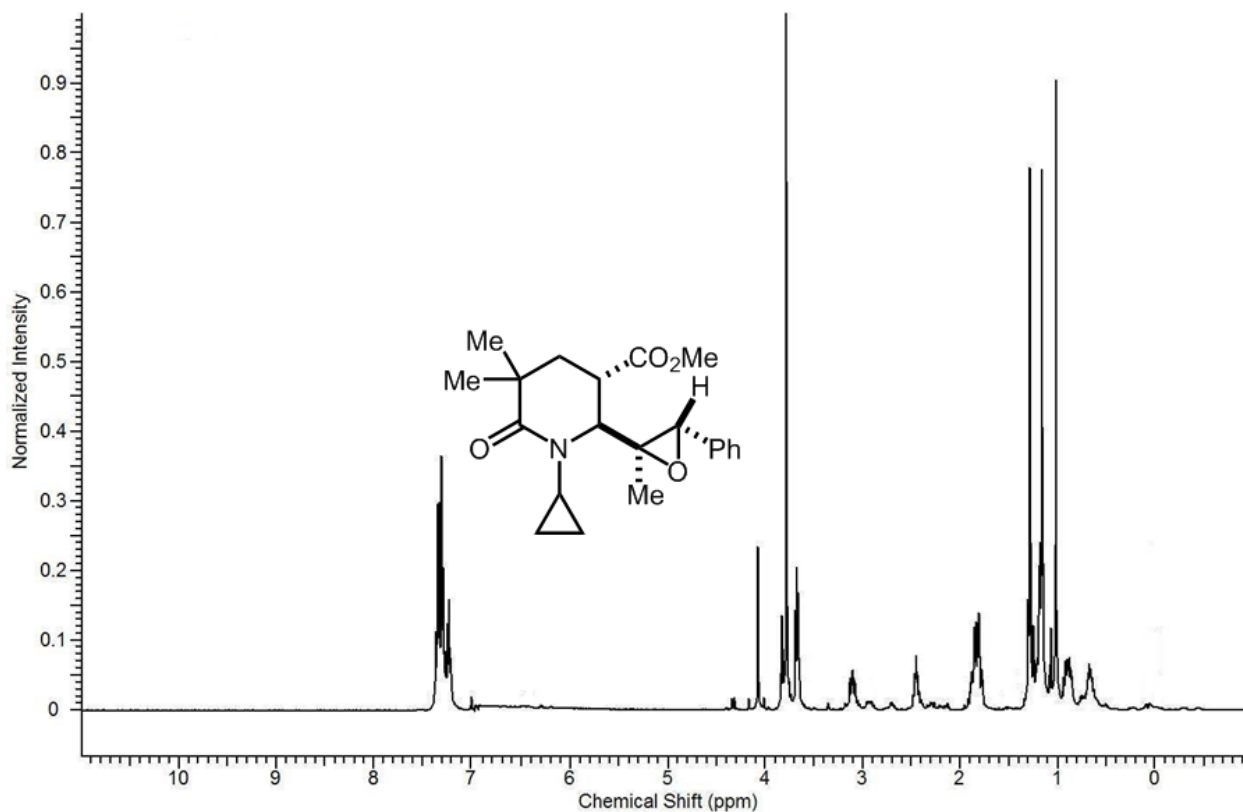



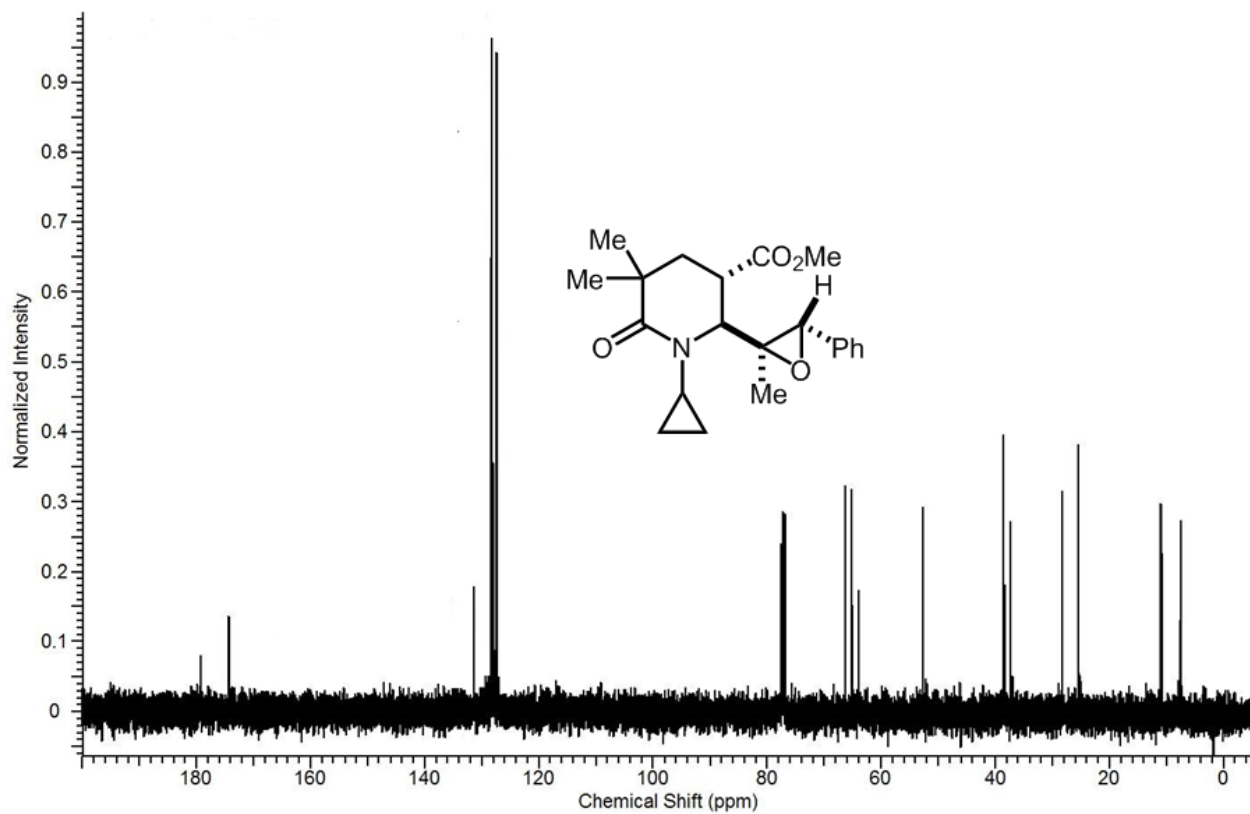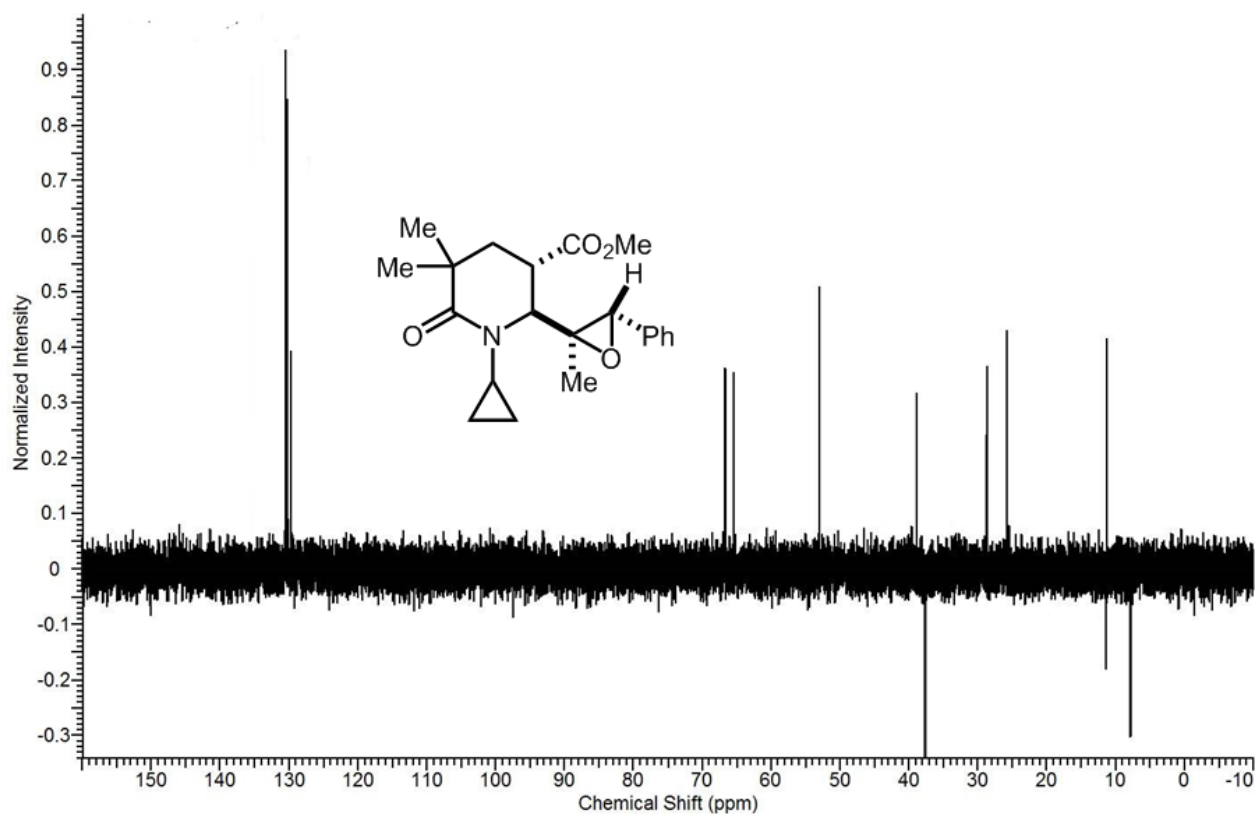

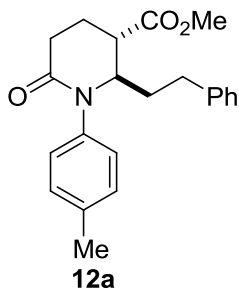

Prepared from alkene **7b2** (0.50 mmol) using General Procedure E. Yield = 167 mg, 95%.  $^1\text{H}$  NMR (400 MHz,  $\text{CDCl}_3$ )  $\delta$  7.35 to 7.13 (7H, m), 7.02 (2H, d), 4.30 to 4.20 (1H, m), 3.79 (3H, s), 2.80 to 2.71 (1H, t), 2.65 to 2.16 (9H, m), 2.10 to 1.979 (1H, m), 1.83 to 1.79 (1H, m).  $^{13}\text{C}$  NMR (101 MHz,  $\text{CDCl}_3$ )  $\delta$  173.2, 169.1, 140.5, 138.9, 137.0, 129.9, 129.9, 128.5, 128.4, 128.2, 128.1, 127.6, 127.3, 126.2, 126.1, 61.0, 52.5, 41.3, 34.6, 31.9, 29.7, 21.2, 19.9. **HRMS- $\text{EI}^+$**  ( $m/z$ ): calc'd for  $\text{C}_{22}\text{H}_{25}\text{NO}_3$  351.1834; found 351.1839.

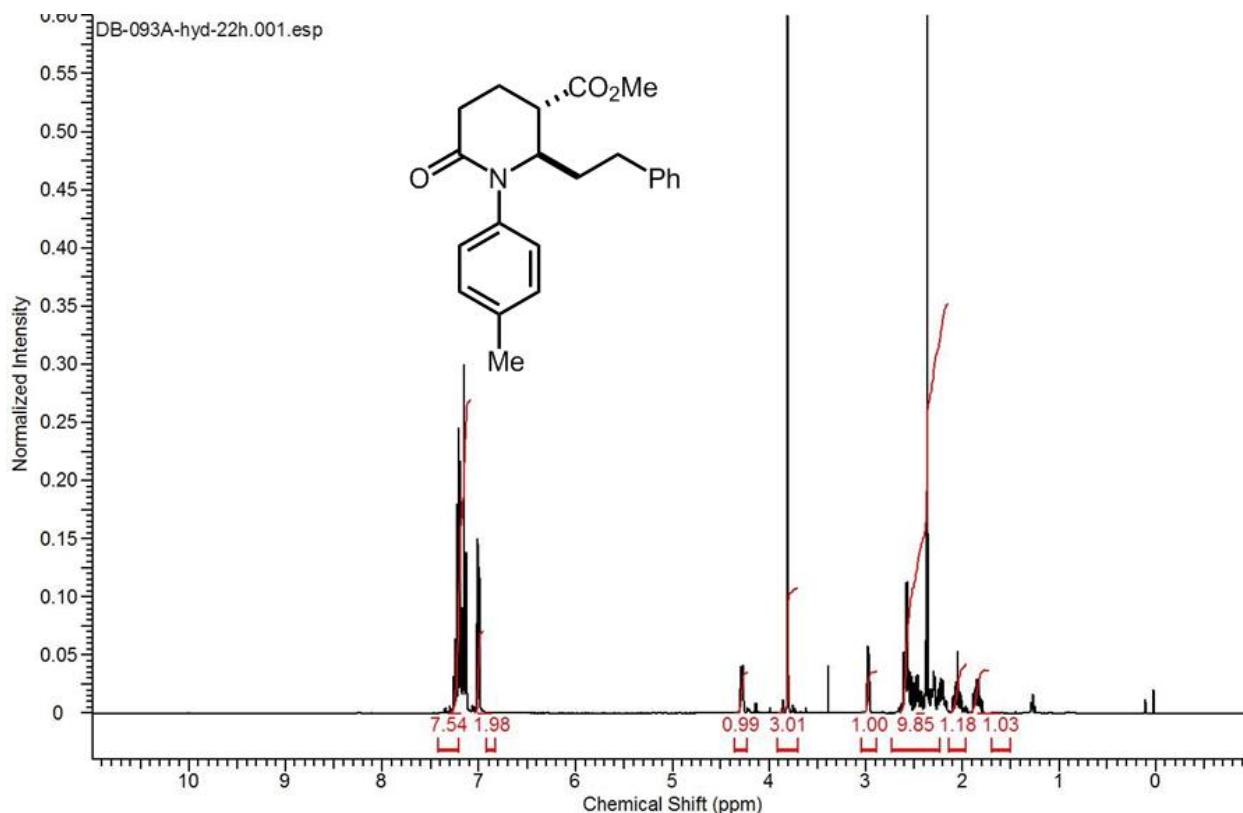

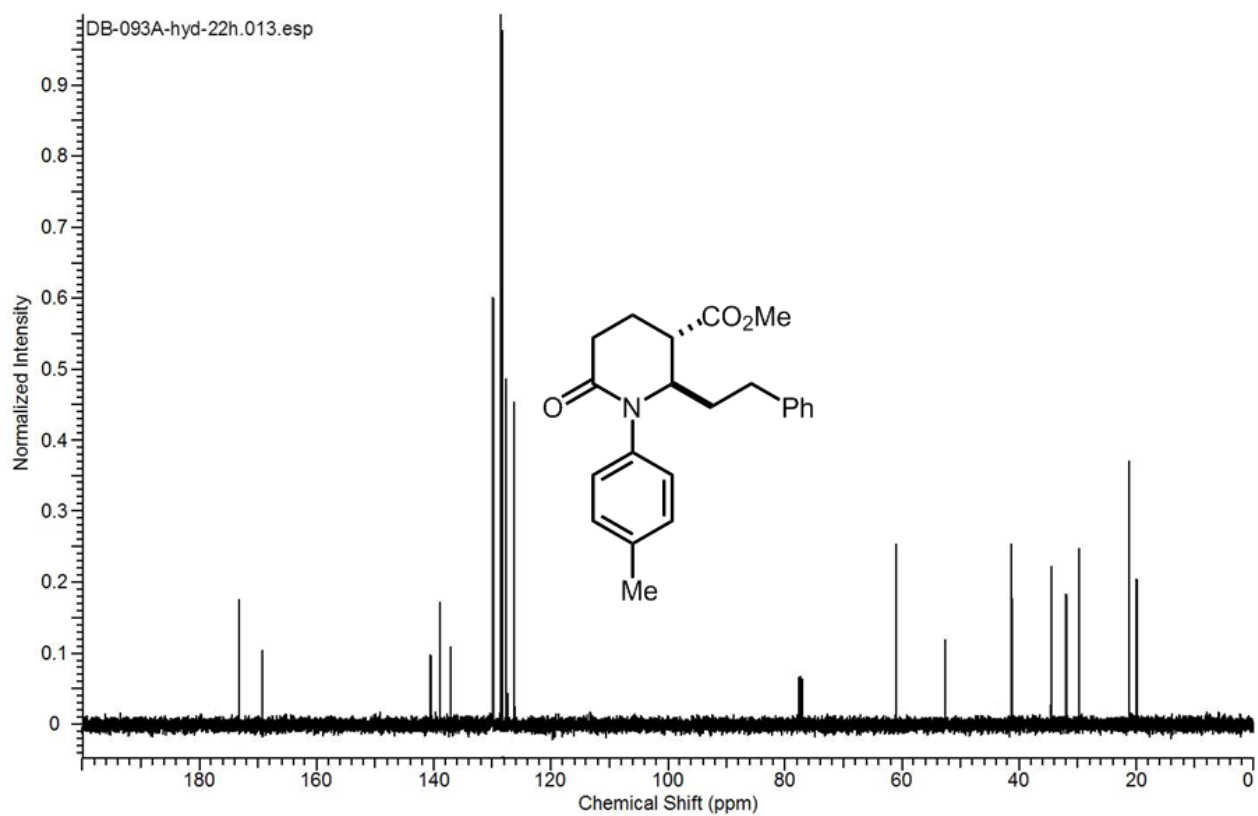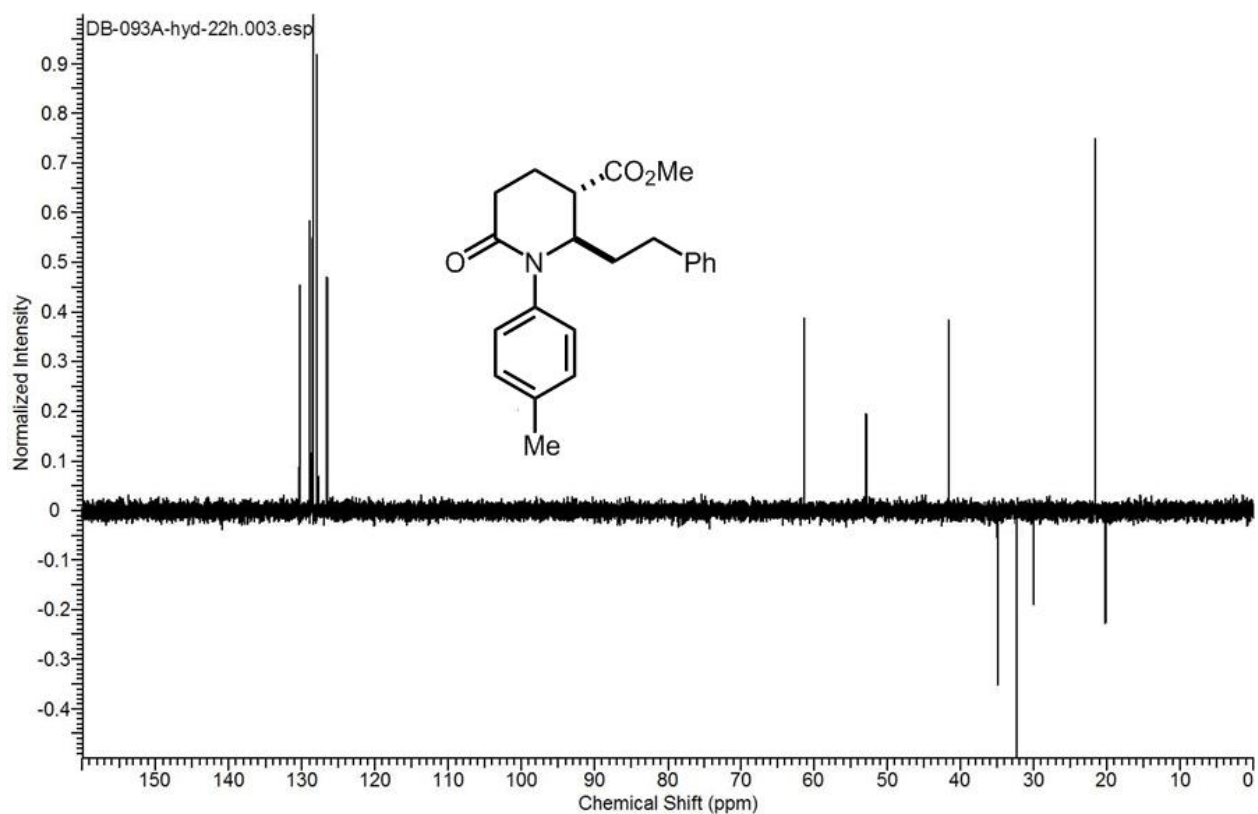

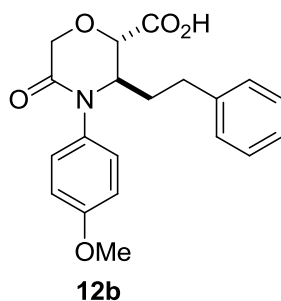

Prepared from alkene **5c1** (0.50 mmol) using General Procedure E. Yield = 174 mg, 98%, >99:1 dr.  $^1\text{H}$  NMR (400 MHz,  $\text{CDCl}_3$ )  $\delta$  10.38 (1H, s, br), 7.37 to 6.76 (9H, m), 4.76 to 4.37 (3H, m), 4.18 (1H, d), 3.80 (3H, s), 2.70 to 2.52 (2H, m), 2.21 to 2.07 (2H, m).  $^{13}\text{C}$  NMR (101 MHz,  $\text{CDCl}_3$ )  $\delta$  172.51, 167.42, 158.96, 140.15, 132.07, 129.34, 128.65, 128.49, 128.21, 128.20, 128.13, 126.39, 114.23, 72.54, 64.63, 60.74, 55.56, 33.29, 32.03. **HRMS- $\text{EI}^+$**  ( $m/z$ ): calc'd for  $\text{C}_{20}\text{H}_{21}\text{NO}_5$  355.1420; found 355.1417.

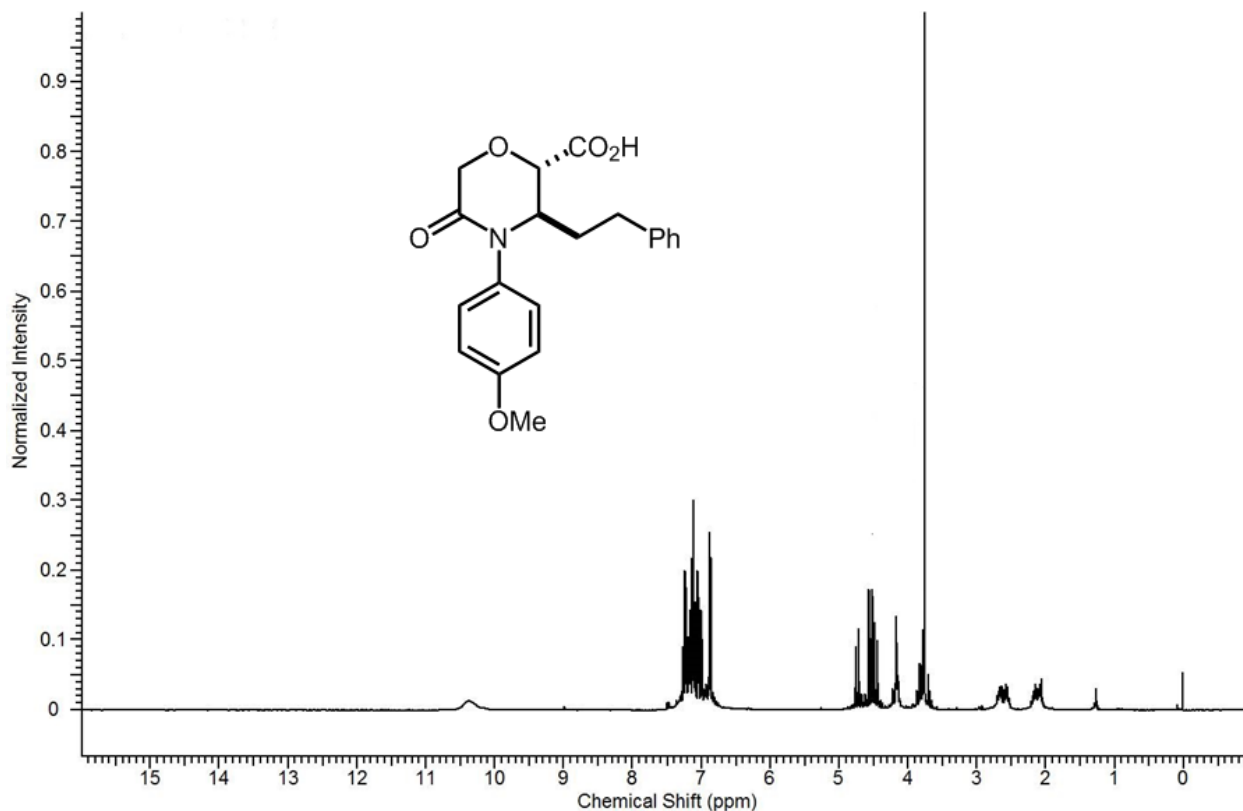

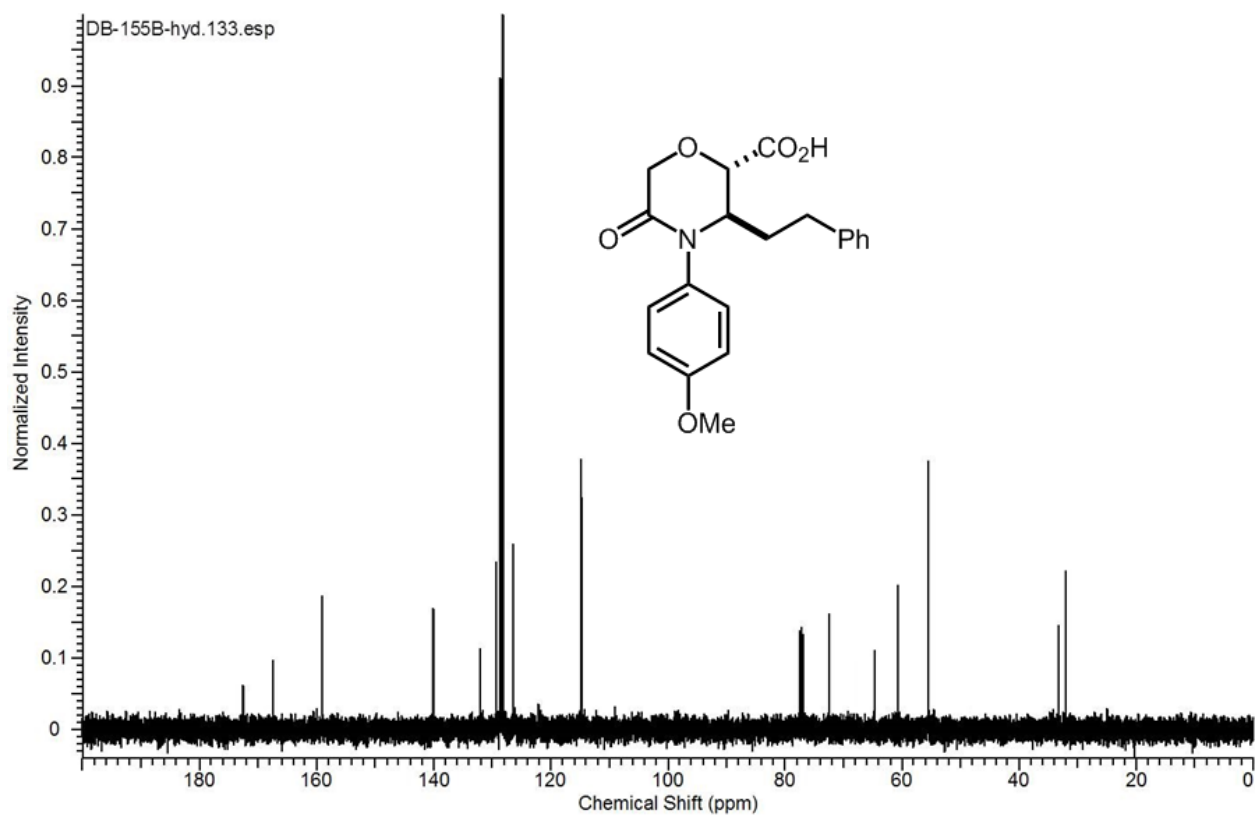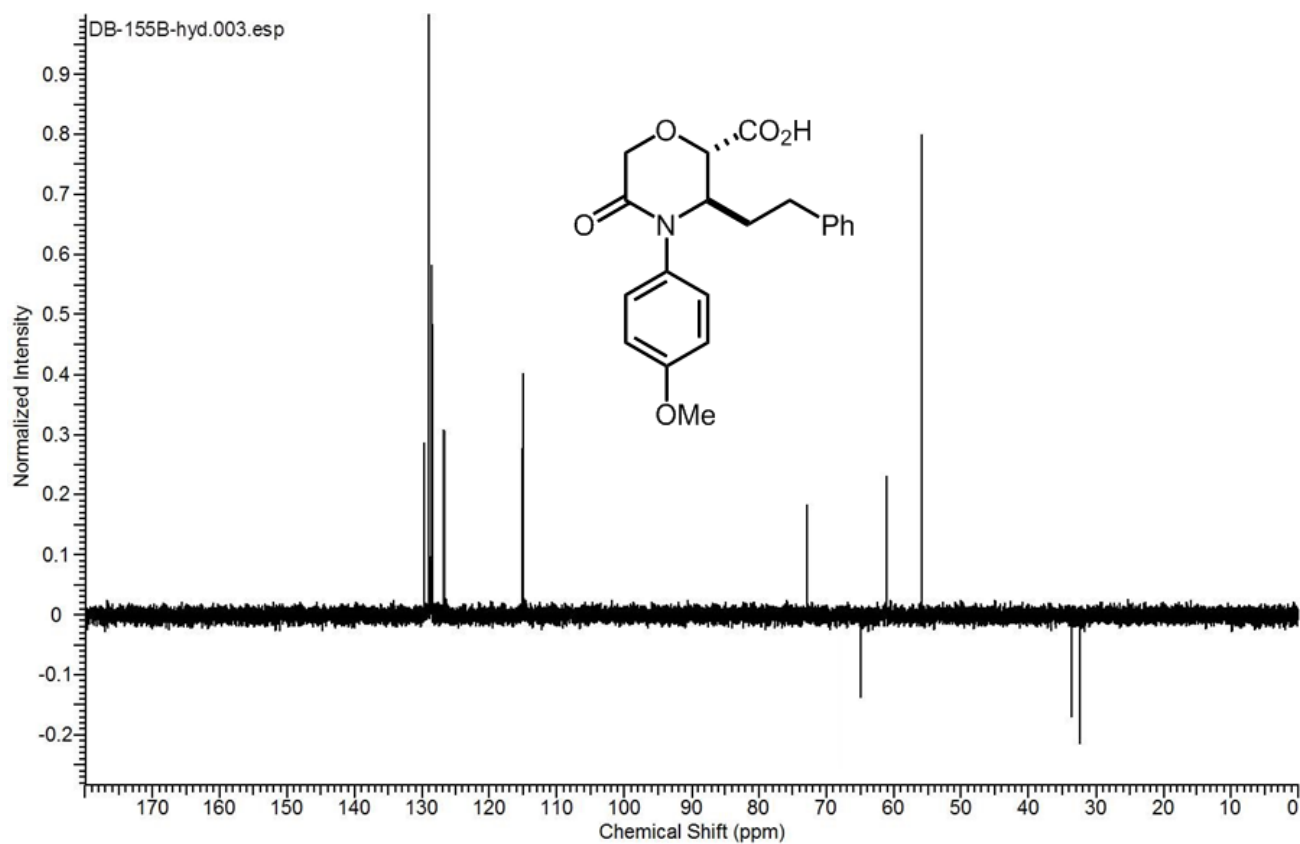

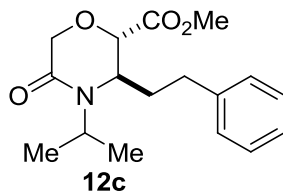

Prepared from alkene **5q2** (0.25 mmol) using General Procedure E. Yield = 75 mg, 96%, 86:14 dr.  $^1\text{H}$  NMR (400 MHz,  $\text{CDCl}_3$ )  $\delta$  7.39 to 7.12 (5H, m), 4.61 to 4.09 (4H, m), 3.77 to 3.61 (4H, m), 2.83 to 2.61 (2H, m), 2.27 to 1.92 (2H, m), 1.32 to 1.02 (6H, m).  $^{13}\text{C}$  NMR (101 MHz,  $\text{CDCl}_3$ )  $\delta$  171.0, 170.1, 168.4, 165.7, 165.4, 141.2, 140.2, 128.7, 128.6, 128.6, 128.4, 128.3, 127.3, 126.5, 126.3, 80.8, 77.5, 77.1, 76.8, 76.2, 72.5, 69.6, 68.1, 67.4, 64.7, 60.4, 54.0, 52.9, 52.6, 52.5, 52.0, 49.3, 46.4, 44.1, 39.0, 35.2, 33.7, 32.5, 31.7, 29.7, 22.7, 21.1, 20.4, 20.1, 19.9, 19.7, 19.2, 19.1, 14.2. **HRMS- $\text{EI}^+$**  ( $m/z$ ): calc'd for  $\text{C}_{17}\text{H}_{23}\text{NO}_4$  305.1627; found 305.1622.

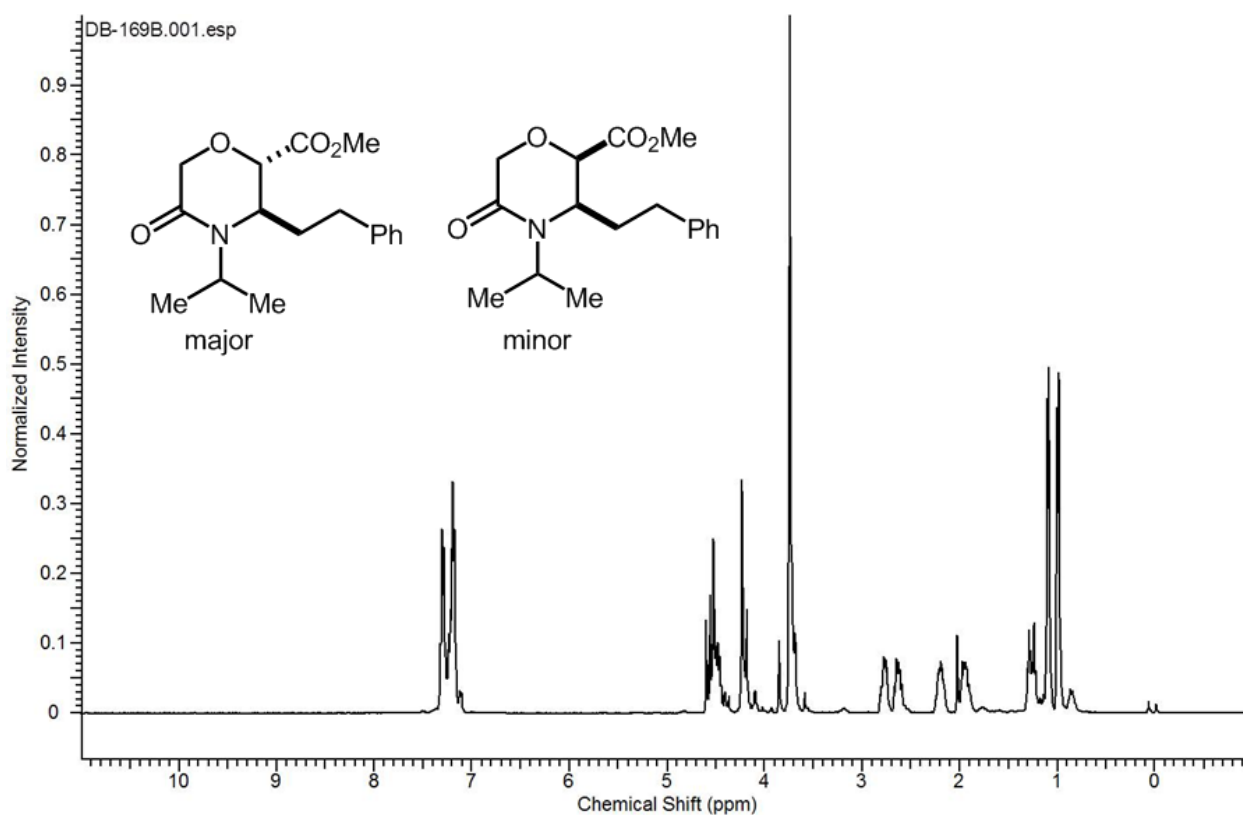

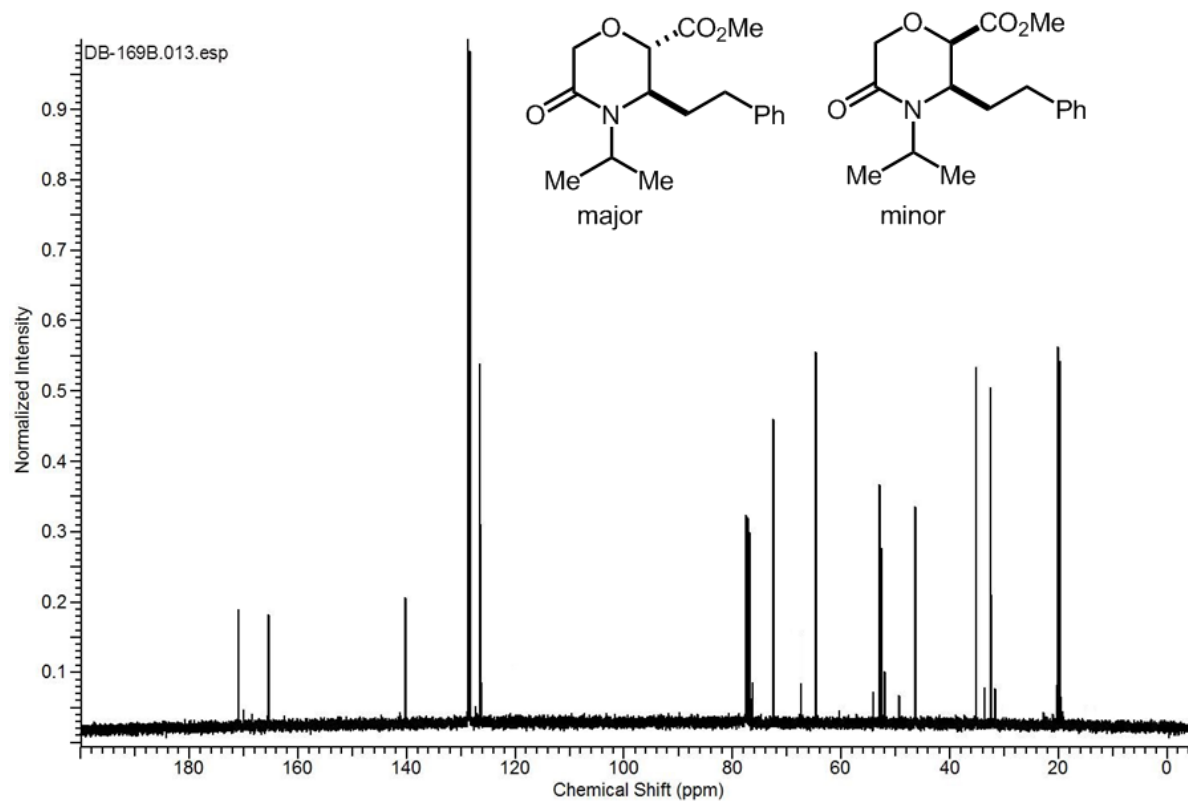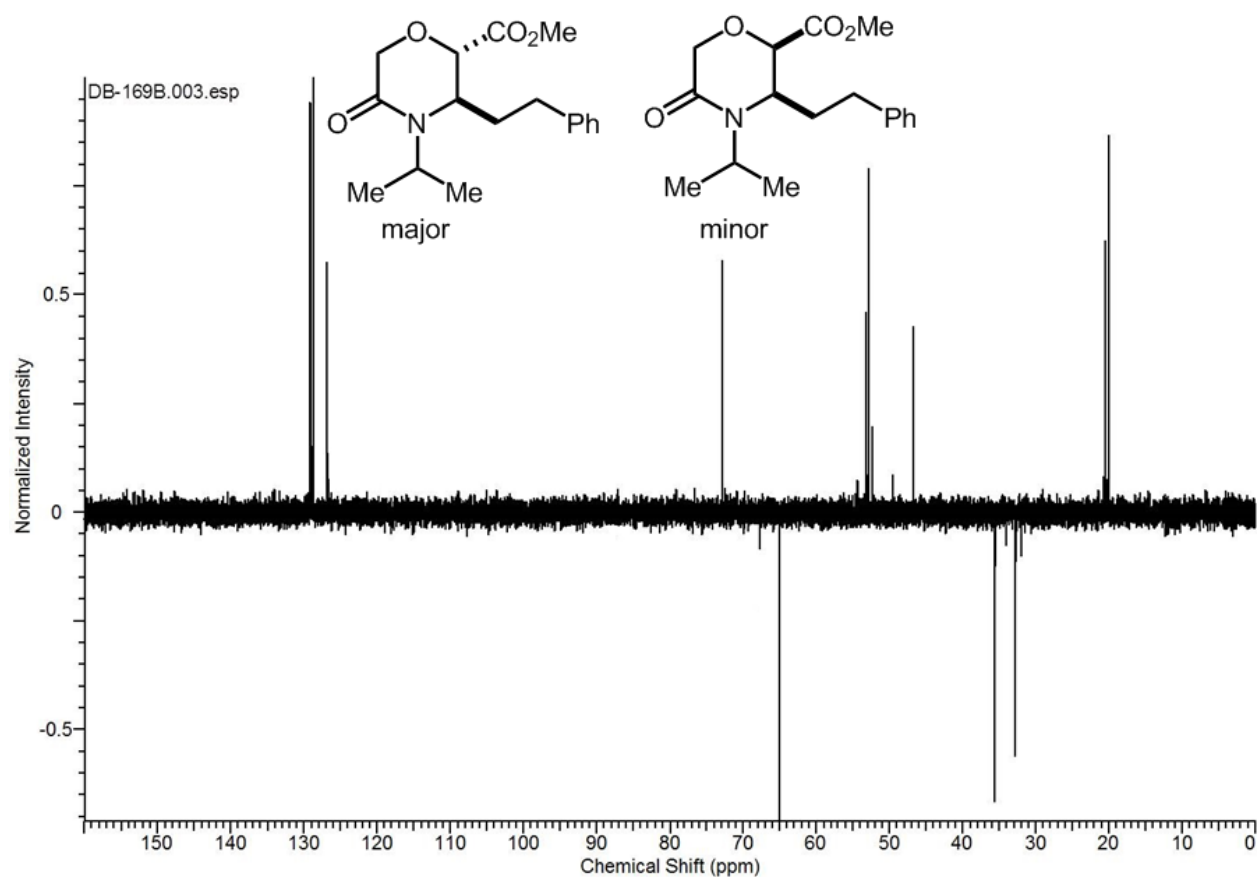

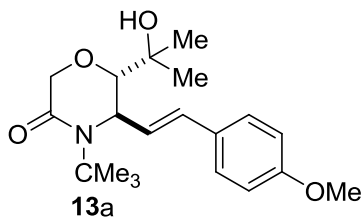

Prepared from ester **5p2** (0.50 mmol) and MeLi (1.42 mL, 1.4 M solution in THF, 2 mmol, 4 equiv) using General Procedure D. Yield = 151 mg, 87%.  $^1\text{H}$  NMR (400 MHz,  $\text{CDCl}_3$ )  $\delta$  7.31 (2H, d), 6.84 (2H, d), 6.41 (1H, d), 5.97 to 5.91 (1H, dd), 4.69 to 4.66 (1H, dd), 4.17 (1H, d), 3.95 (1H, d), 3.79 (3H, s), 3.58 (1H, d), 2.29 (1H, s), 1.44 to 1.24 (9H, m).  $^{13}\text{C}$  NMR (101 MHz,  $\text{CDCl}_3$ )  $\delta$  171.3, 159.6, 132.0, 130.5, 130.4, 130.0, 128.7, 127.9, 127.8, 127.6, 125.6, 125.0, 114.2, 114.0, 113.7, 85.0, 84.1, 80.0, 77.4, 77.1, 76.8, 72.9, 71.2, 68.7, 68.0, 57.9, 55.7, 55.4, 55.2, 53.8, 30.4, 30.0, 28.8, 28.5, 28.4, 28.4, 28.0, 27.3, 26.7, 26.4, 26.2, 25.6, 14.3. **HRMS-ESI<sup>+</sup>** ( $m/z$ ): calc'd for  $\text{C}_{20}\text{H}_{29}\text{NO}_4$  347.2097; found 347.2095.

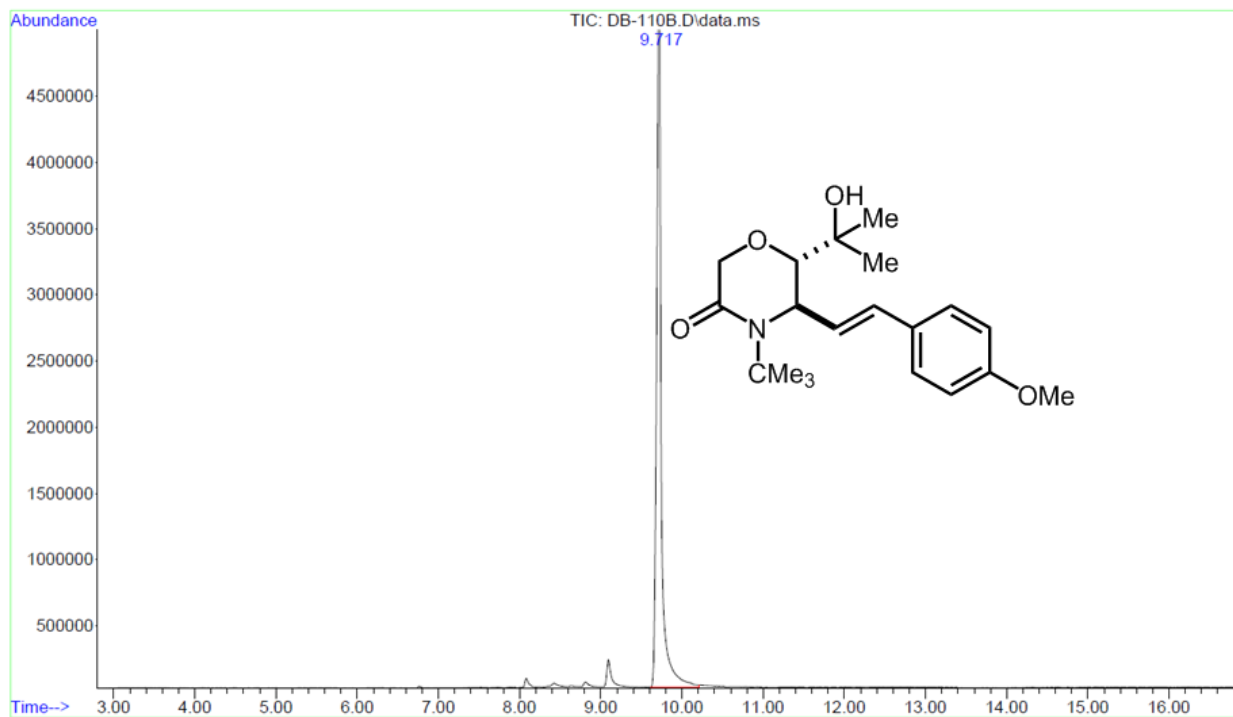



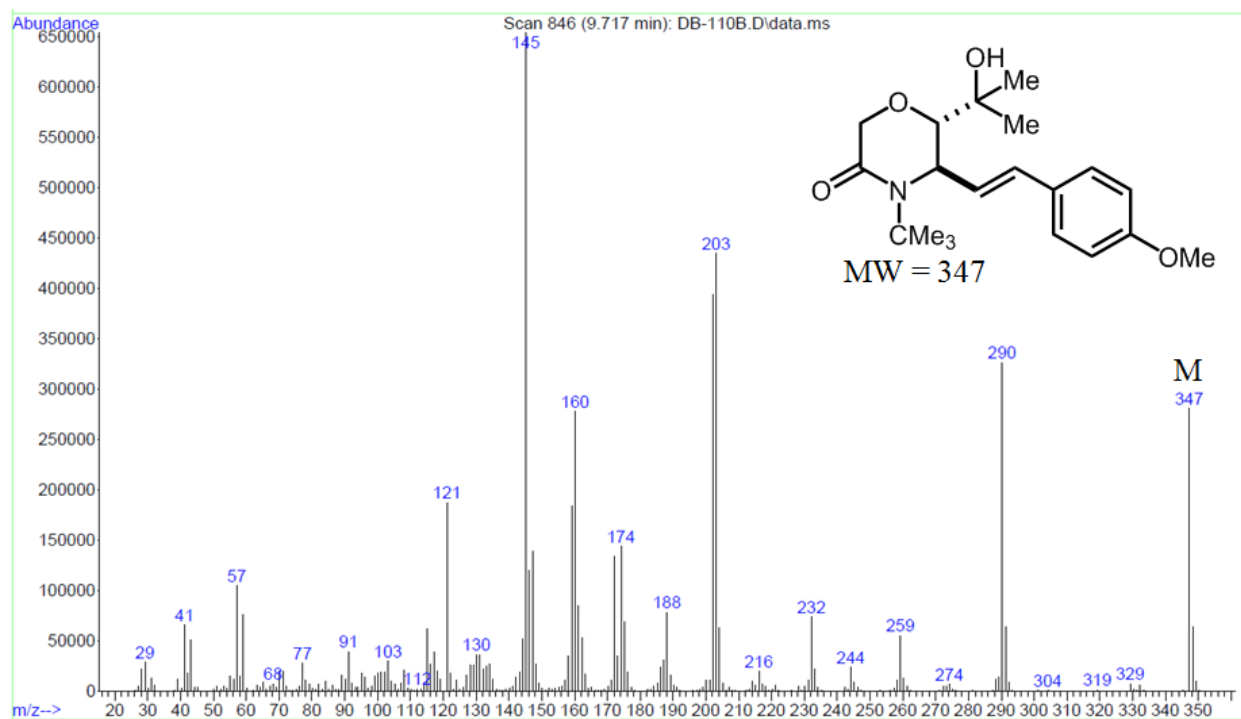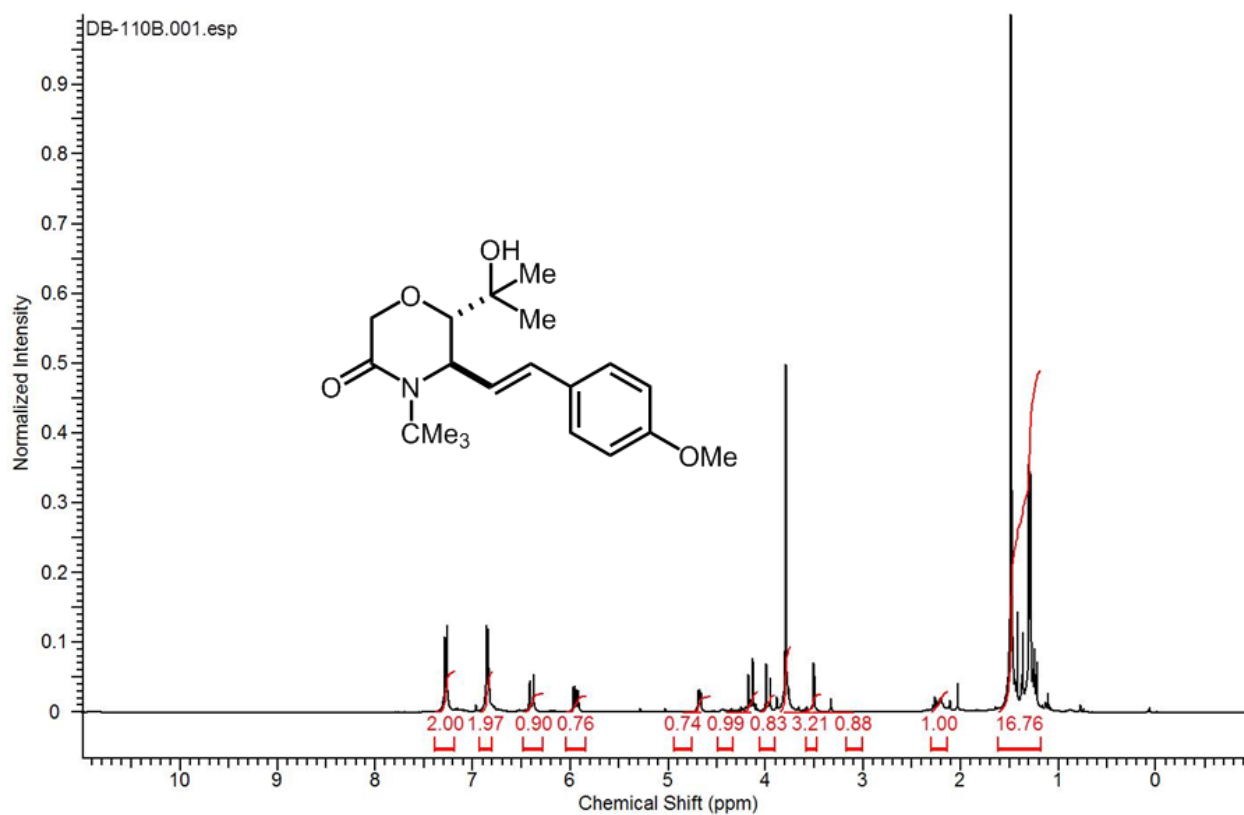

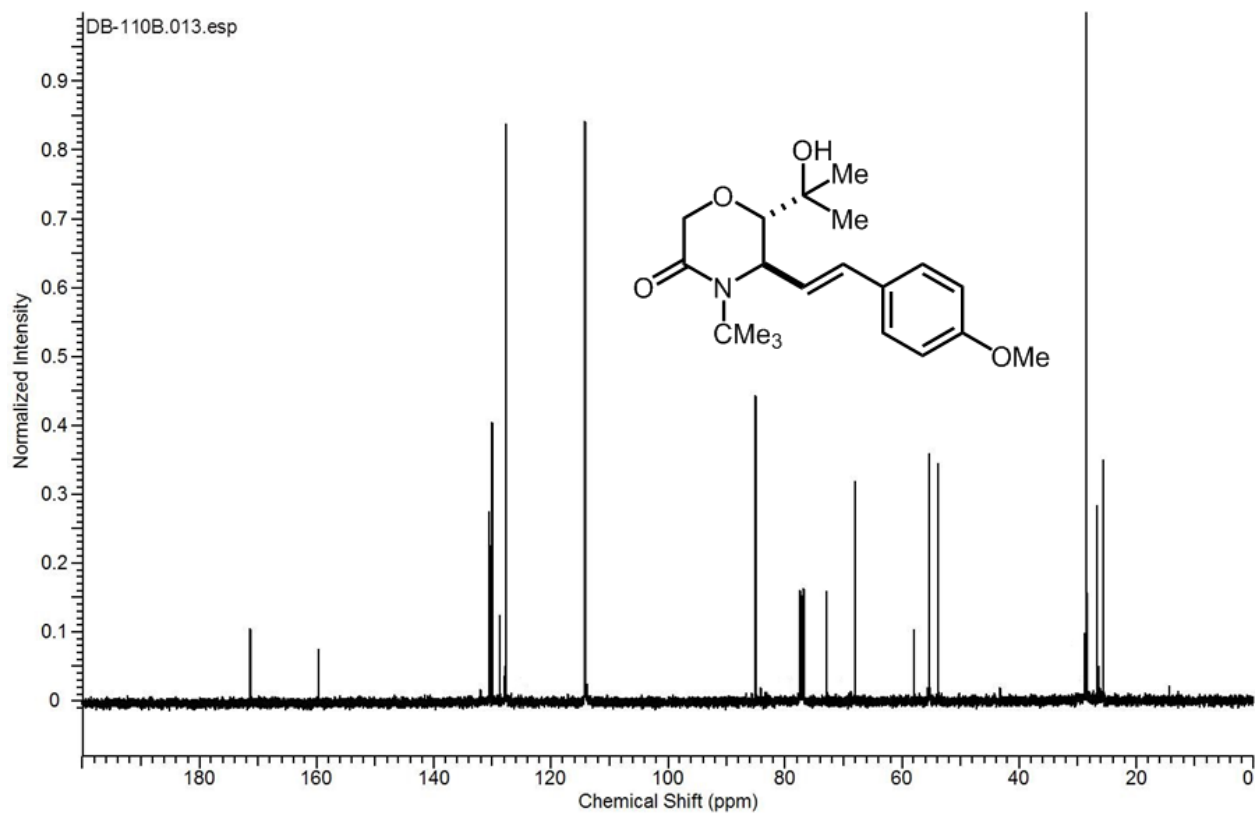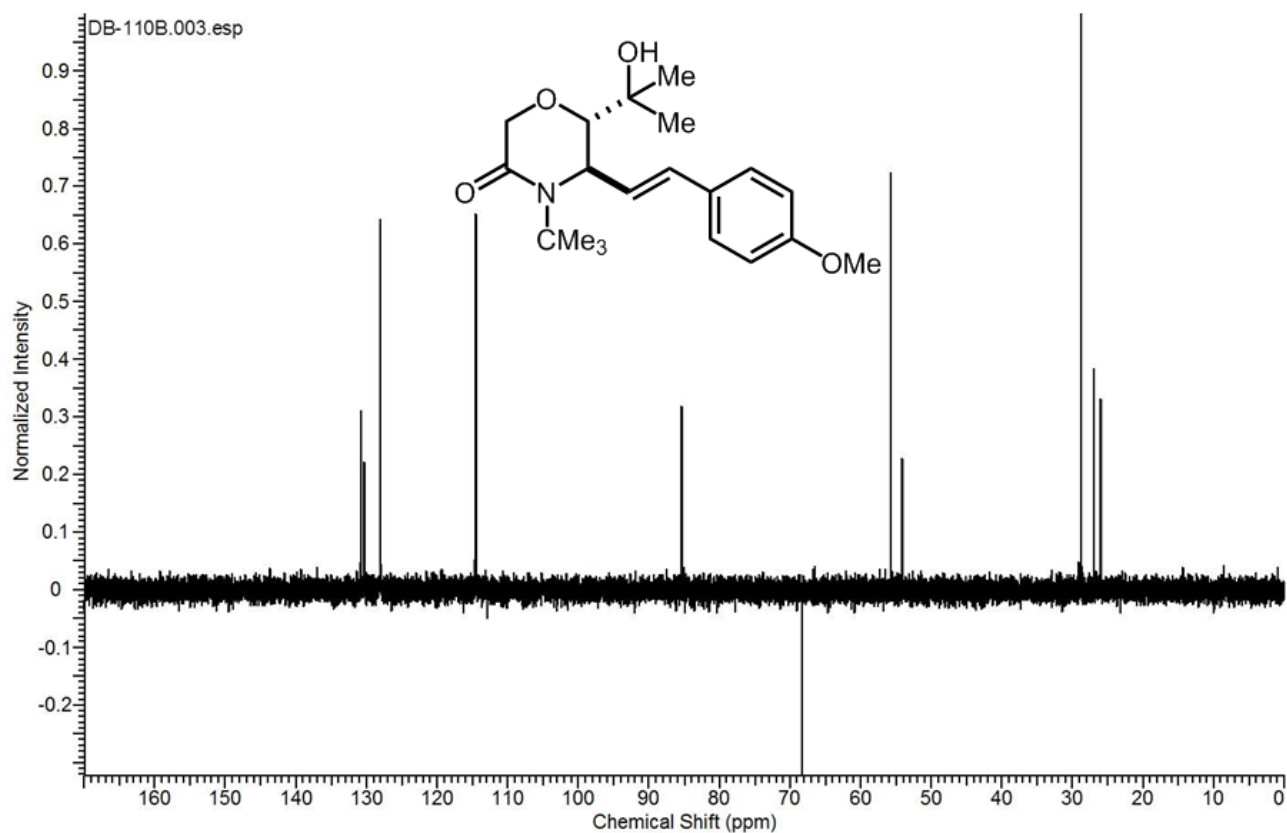

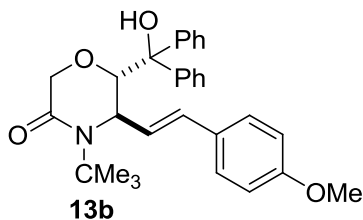

Prepared from ester **5p2** (0.50 mmol) and phenyllithium (3.0 mL, 1.0 M solution in Et<sub>2</sub>O, 3 mmol, 6 equiv) using General Procedure D. Yield = 200 mg, 85%. <sup>1</sup>H NMR (400 MHz, CDCl<sub>3</sub>) δ 7.59 to 7.21 (10H, m), 7.08 (2H, d), 6.83 (2H, d), 5.71 (1H, dd), 5.33 (1H, d), 4.79 to 4.58 (2H, m), 4.40 to 4.13 (2H, m), 3.79 (3H, s), 3.12 (1H, s), 1.31 (9H, s). <sup>13</sup>C NMR (101 MHz, CDCl<sub>3</sub>) δ 171.6, 159.5, 145.0, 142.8, 131.5, 130.4, 129.5, 128.7, 128.5, 128.4, 128.4, 128.3, 128.2, 128.2, 127.8, 127.6, 127.4, 127.3, 126.5, 126.4, 126.2, 126.0, 126.0, 125.9, 125.3, 124.7, 114.2, 83.2, 80.2, 68.4, 59.3, 58.0, 57.7, 28.7. **HRMS-EI<sup>+</sup>** (*m/z*): calc'd for C<sub>30</sub>H<sub>33</sub>NO<sub>4</sub> 471.2410; found 471.2417.

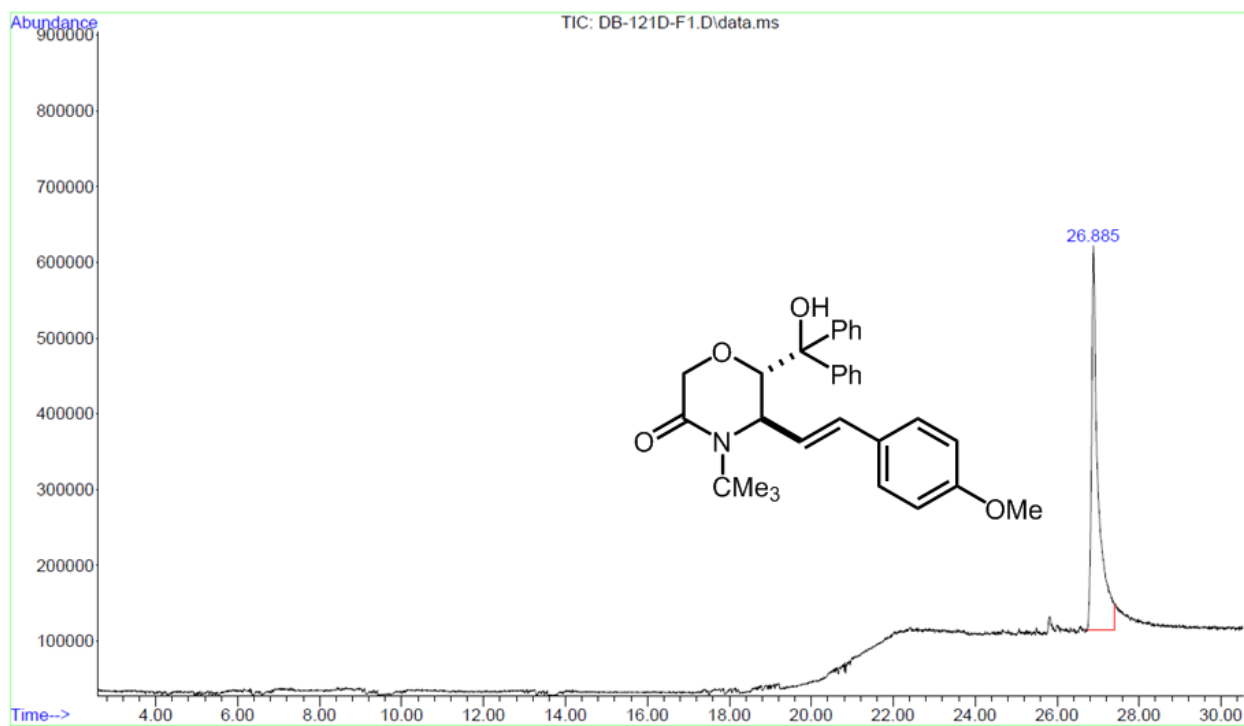

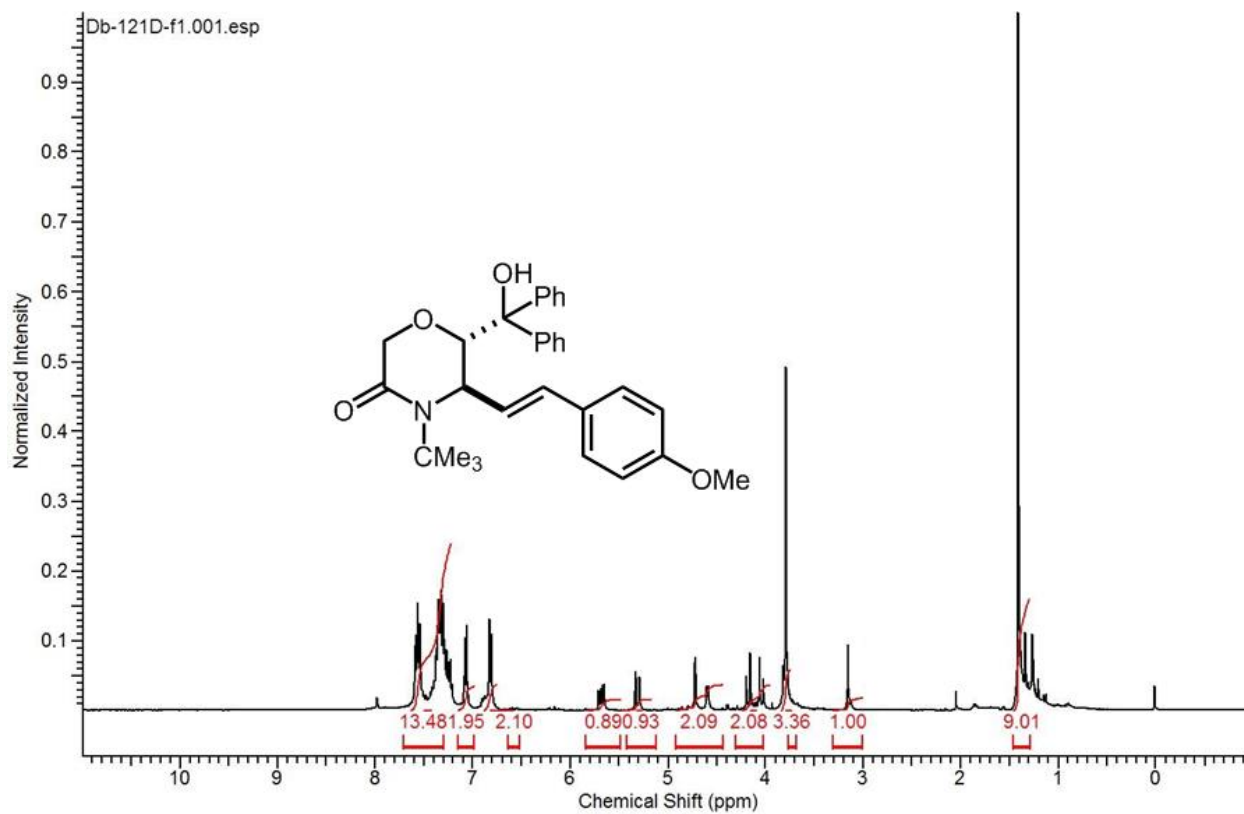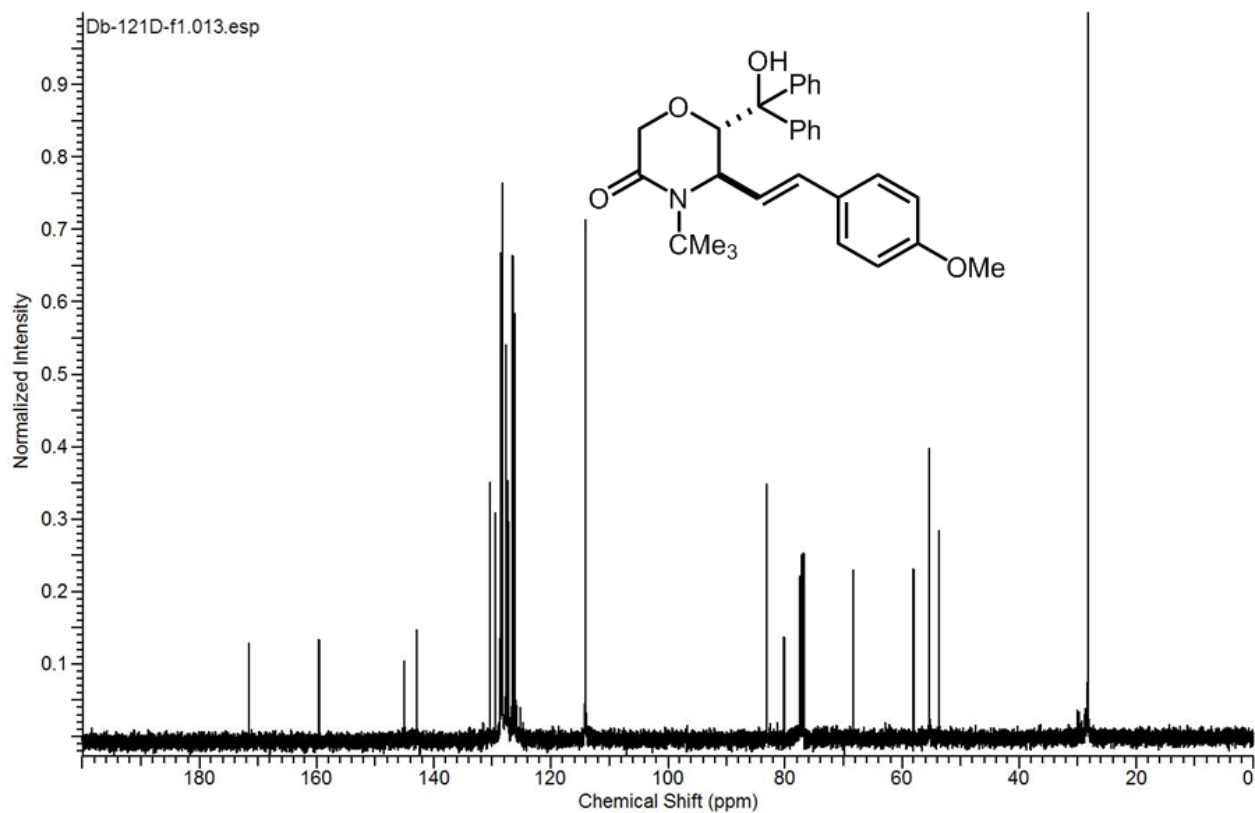

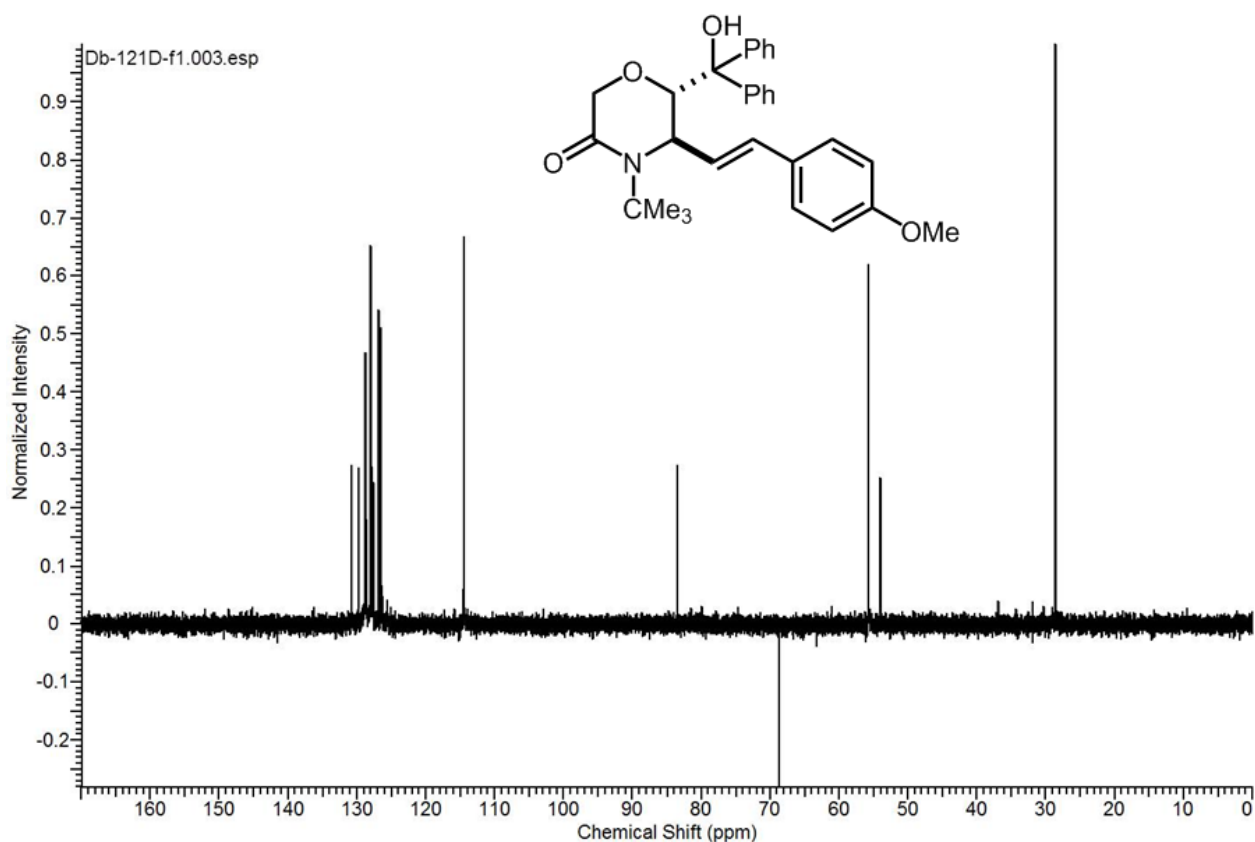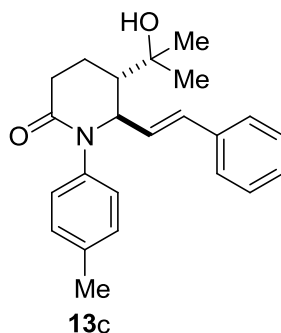

Prepared from ester **7b2** (0.50 mmol) and MeLi (1.42 mL, 1.4 M solution in THF, 2 mmol, 4 equiv) using General Procedure D. Yield = 154 mg, 88%.  $^1\text{H}$  NMR (400 MHz,  $\text{CDCl}_3$ )  $\delta$  7.40 to 7.11 (9H, m), 6.43 to 6.21 (2H, m), 4.64 (1H, dd), 2.58 to 2.05 (7H, m), 1.78 to 1.67 (2H, m), 1.44 to 1.39 (6H, s,s).  $^{13}\text{C}$  NMR (101 MHz,  $\text{CDCl}_3$ )  $\delta$  173.1, 139.9, 136.3, 132.5, 129.7, 129.6, 128.7, 127.8, 126.5, 126.5, 126.1, 125.5, 72.9, 62.6, 50.6, 32.0, 29.1, 25.7, 22.2, 21.1. **HRMS- $\text{EI}^+$**  ( $m/z$ ): calc'd for  $\text{C}_{23}\text{H}_{27}\text{NO}_2$  349.2042; found 349.2046.

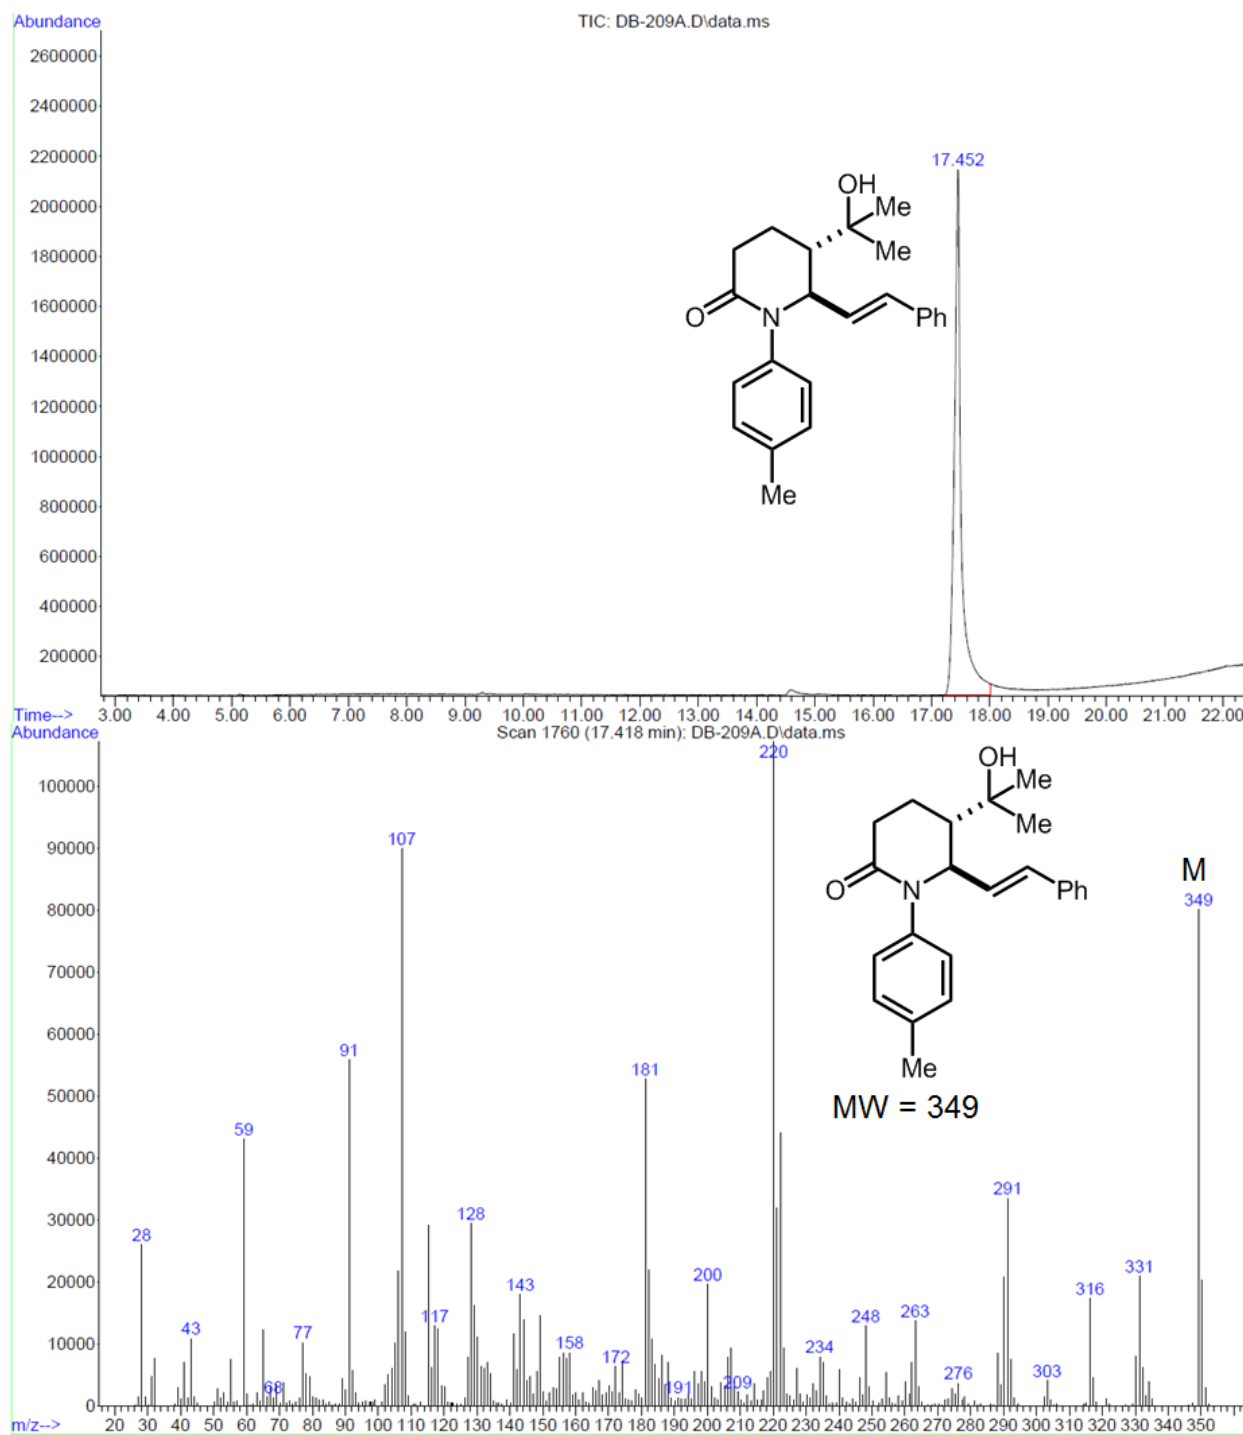

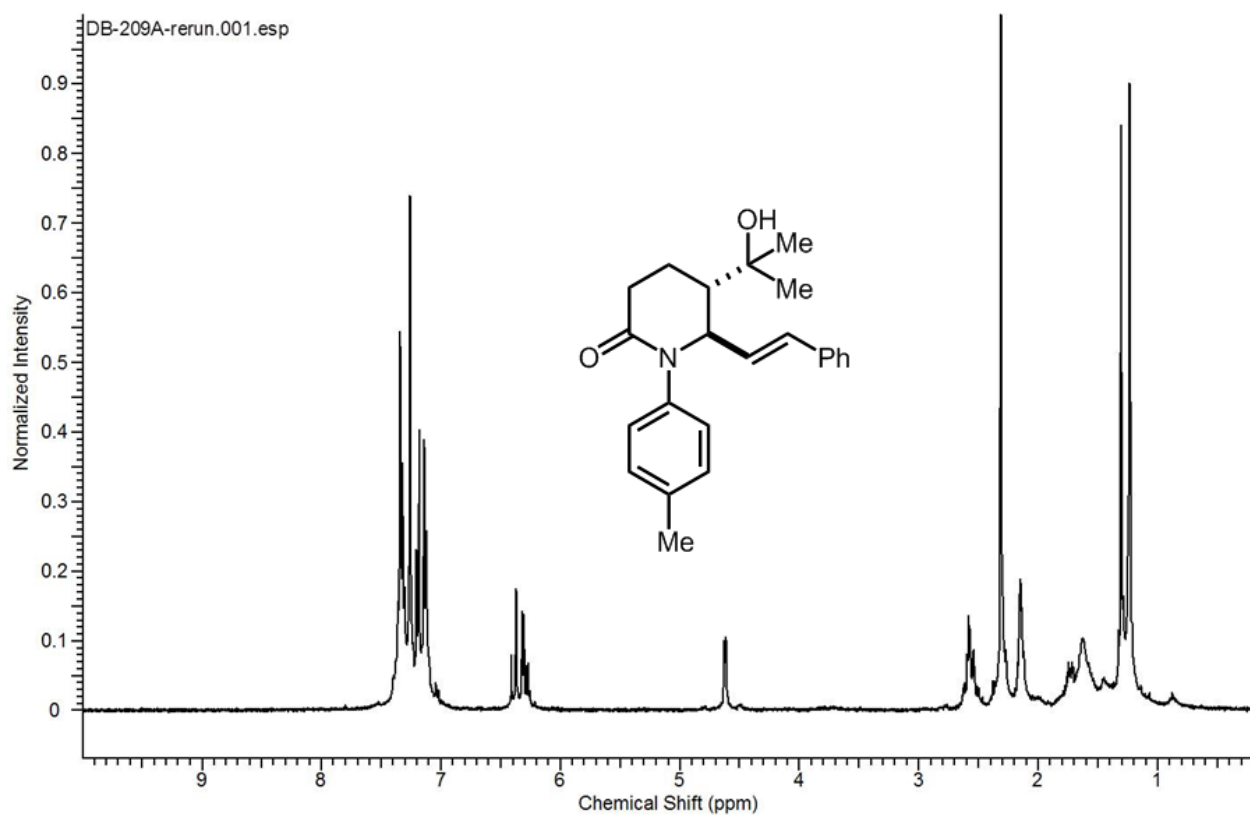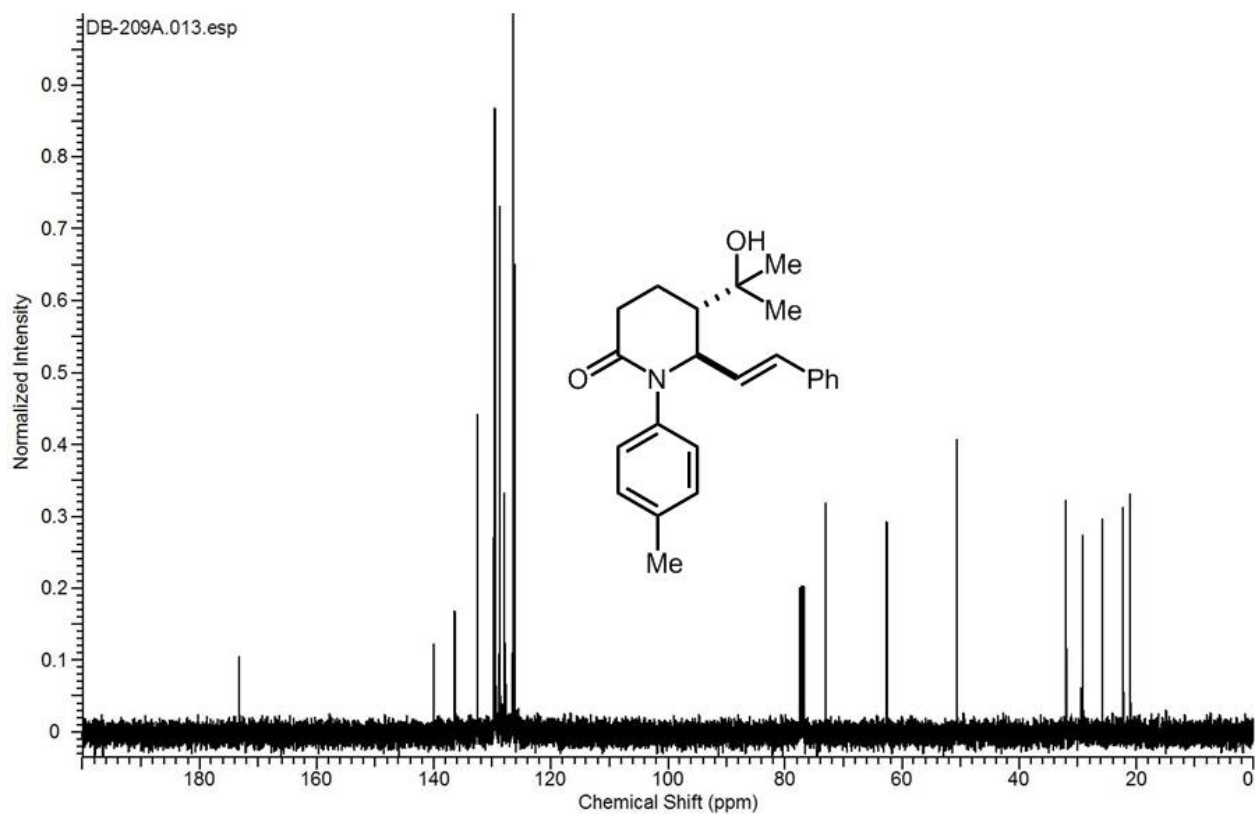

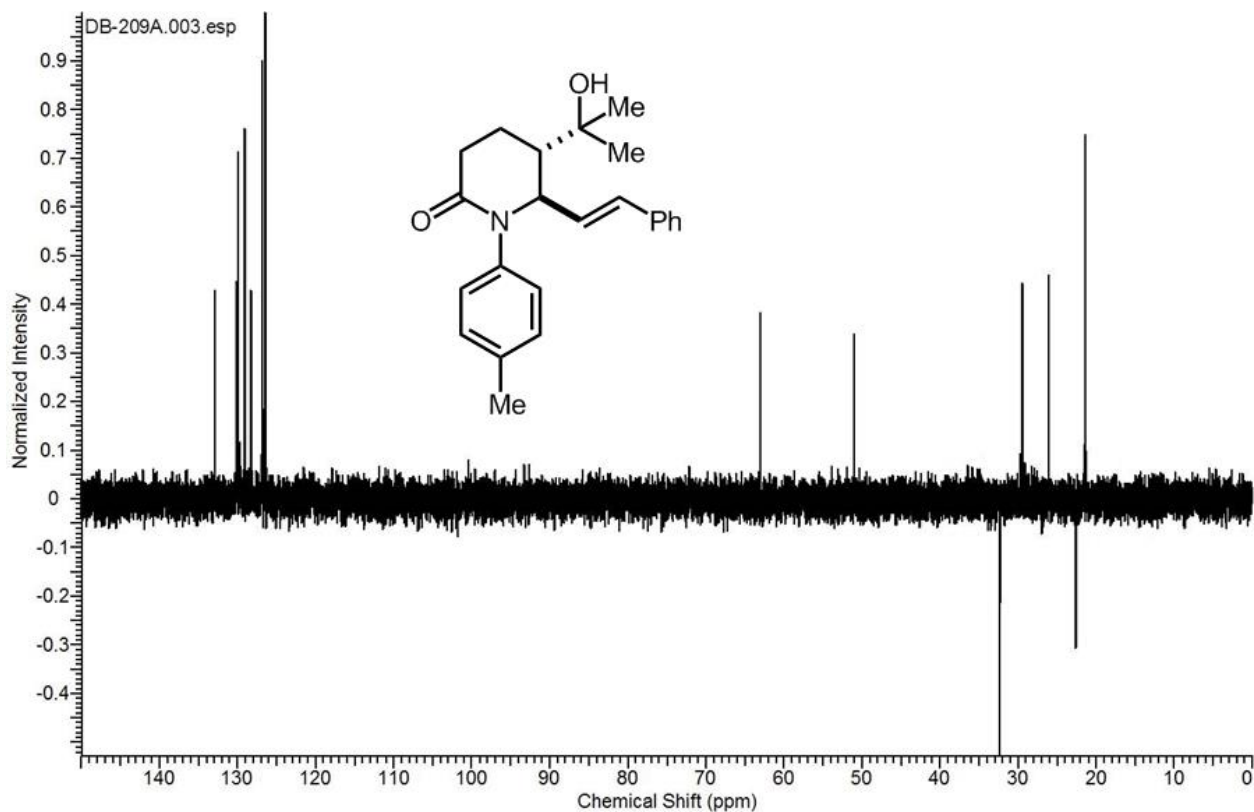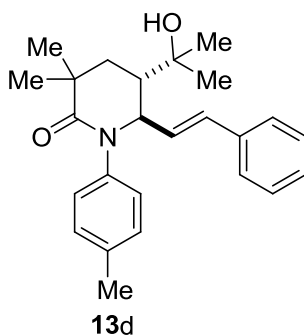

Prepared from ester **7g2** (0.50 mmol) and MeLi (1.42 mL, 1.4 M solution in THF, 2 mmol, 4 equiv) using General Procedure D. Yield = 162 mg, 86%.  $^1\text{H}$  NMR (400 MHz,  $\text{CDCl}_3$ )  $\delta$  7.35 to 7.09 (9H, m), 6.19 to 6.10 (2H, m), 4.49 to 4.44 (1H, dd), 2.31 to 2.17 (5H, m), 1.84 to 1.73 (2H, m), 1.45 to 1.26 (12H, m).  $^{13}\text{C}$  NMR (101 MHz,  $\text{CDCl}_3$ )  $\delta$  176.9, 139.7, 136.4, 133.7, 130.8, 129.6, 128.7, 128.0, 127.9, 126.5, 125.6, 72.9, 65.5, 46.9, 38.9, 37.6, 30.1, 28.9, 27.5, 25.2, 21.1. **HRMS- $\text{EI}^+$**  ( $m/z$ ): calc'd for  $\text{C}_{25}\text{H}_{31}\text{NO}_2$  377.2355; found 377.2359.



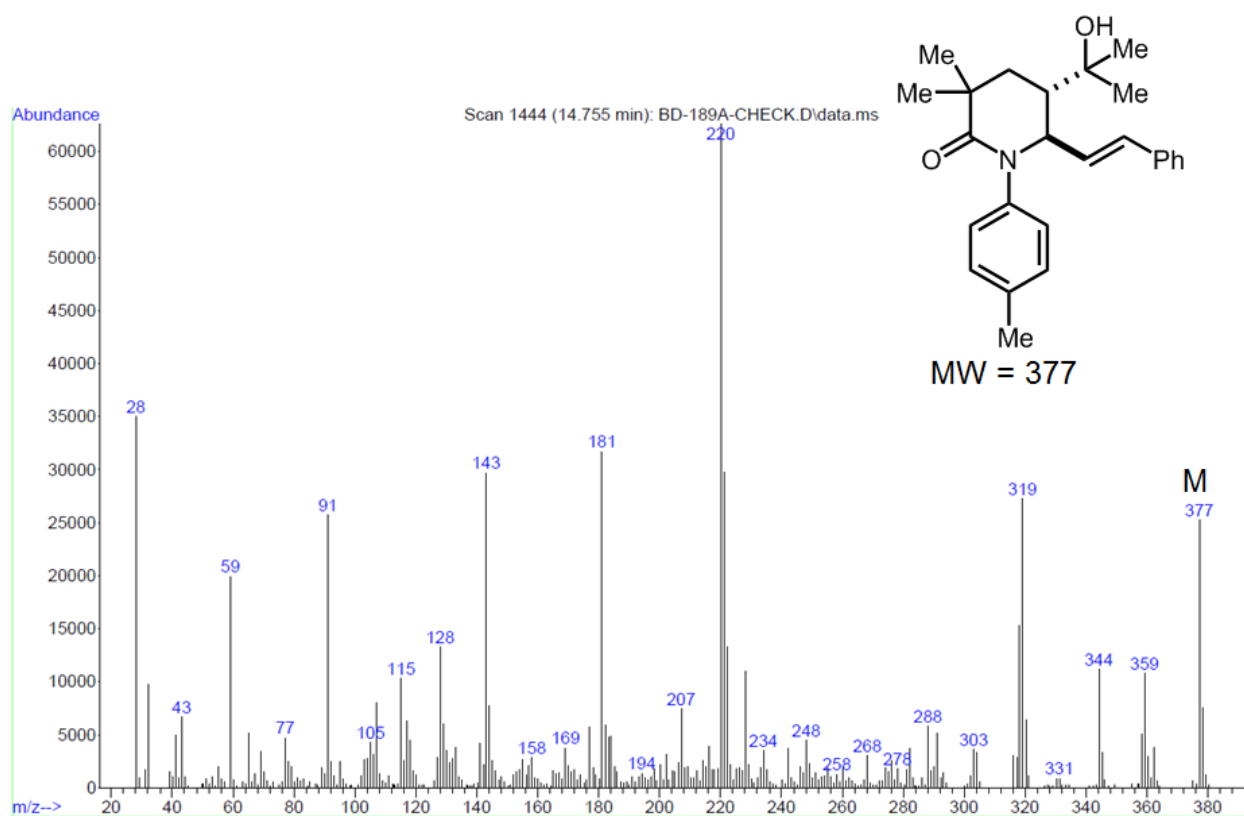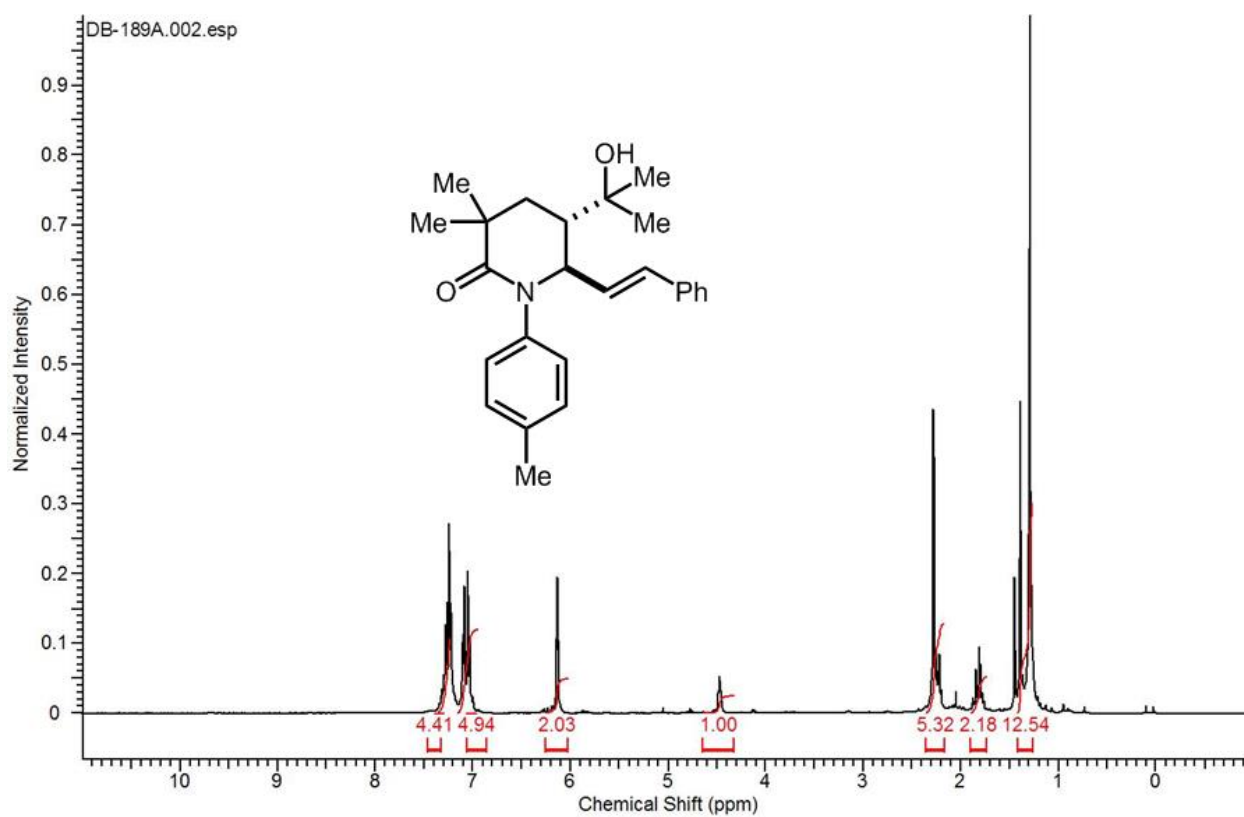

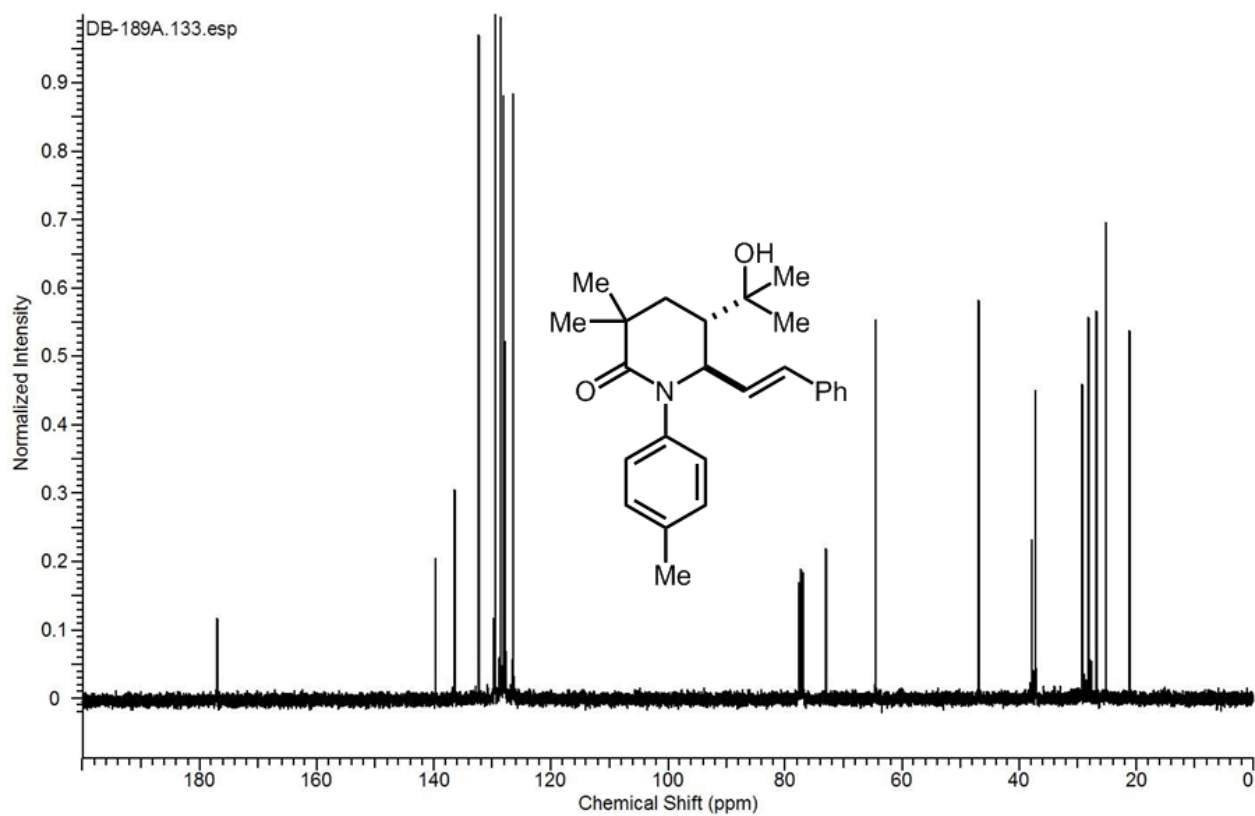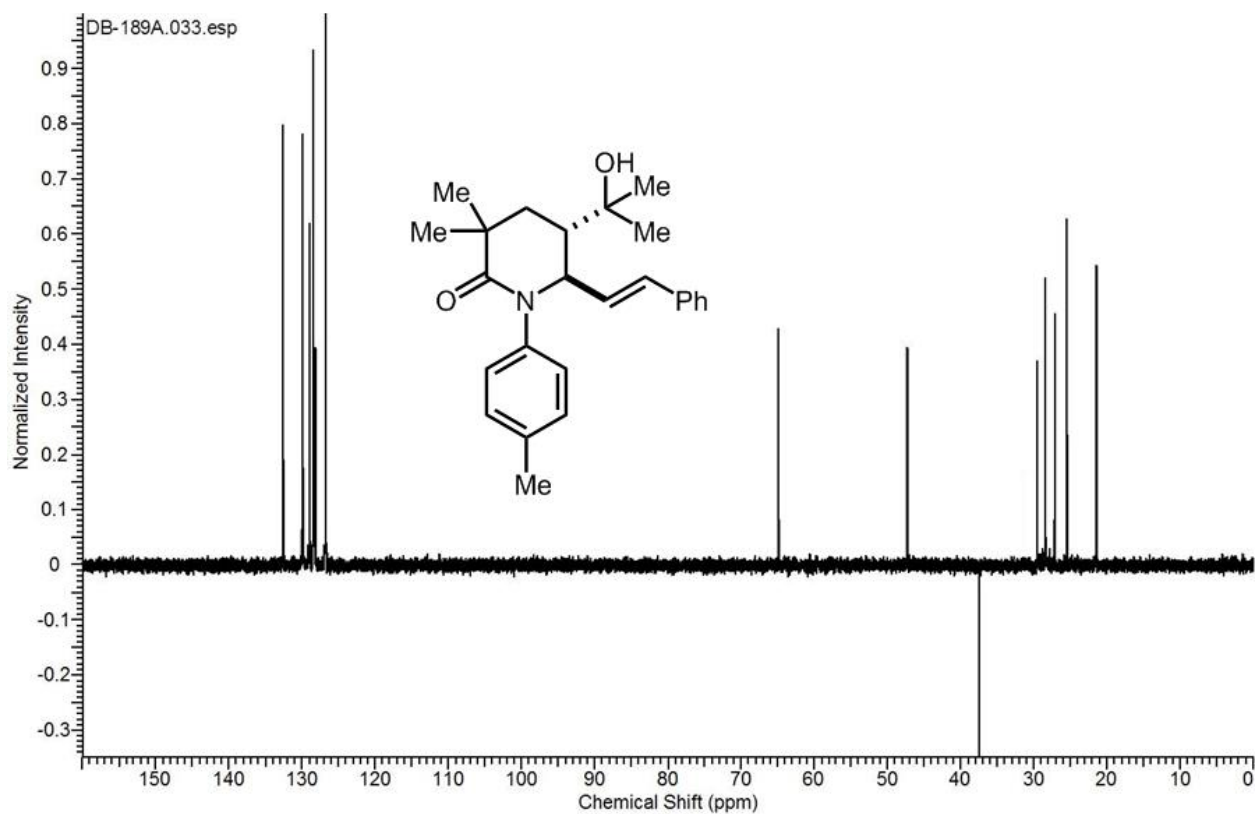

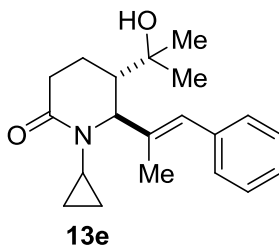

Prepared from ester **7m2** (0.50 mmol) and MeLi (1.42 mL, 1.4 M solution in THF, 2 mmol, 4 equiv) using General Procedure D. Yield = 144 mg, 92%.  $^1\text{H}$  NMR (400 MHz,  $\text{CDCl}_3$ )  $\delta$  7.46 to 7.21 (5H, m), 4.21 to 4.18 (1H, d), 2.49 to 2.22 (2H, m), 1.98 to 1.85 (5H, m), 1.60 to 1.52 (1H, m), 1.35 to 1.22 (7H, s,s), 0.98 to 0.86 (1H, m), 0.79 to 0.56 (3H, m).  $^{13}\text{C}$  NMR (101 MHz,  $\text{CDCl}_3$ )  $\delta$  174.24, 138.18, 137.12, 128.95, 128.77, 128.39, 128.30, 126.86, 73.26, 66.40, 46.50, 31.81, 30.38, 29.48, 28.84, 26.94, 20.90, 14.69, 9.00, 6.31. **HRMS- $\text{EI}^+$**  ( $m/z$ ): calc'd for  $\text{C}_{20}\text{H}_{27}\text{NO}_2$  313.2042; found 313.2037.

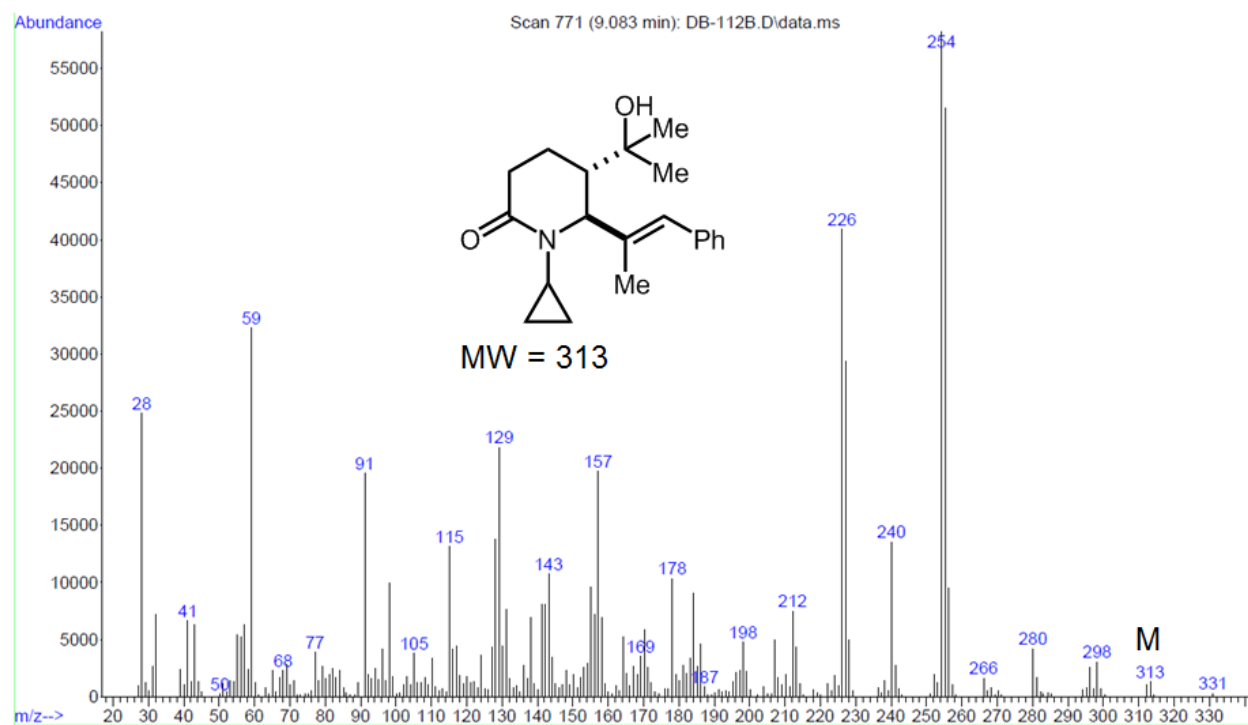

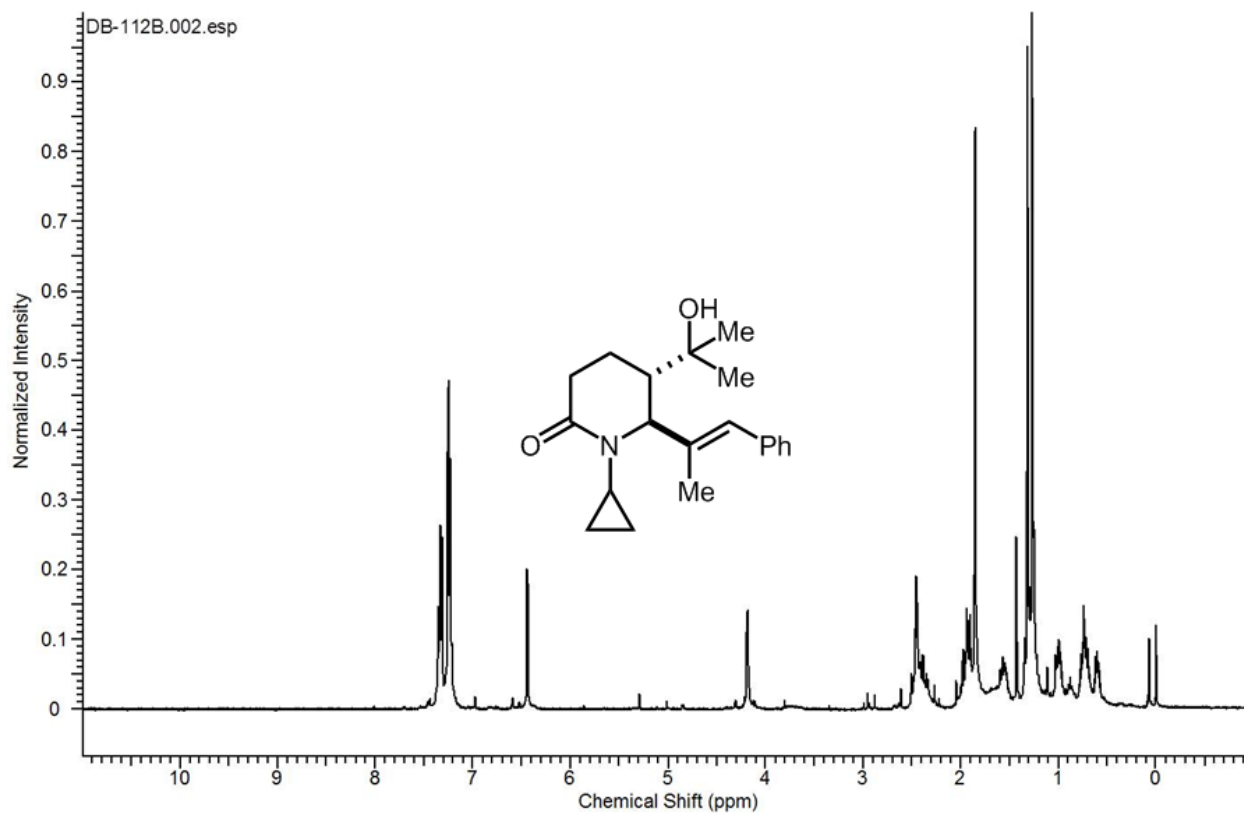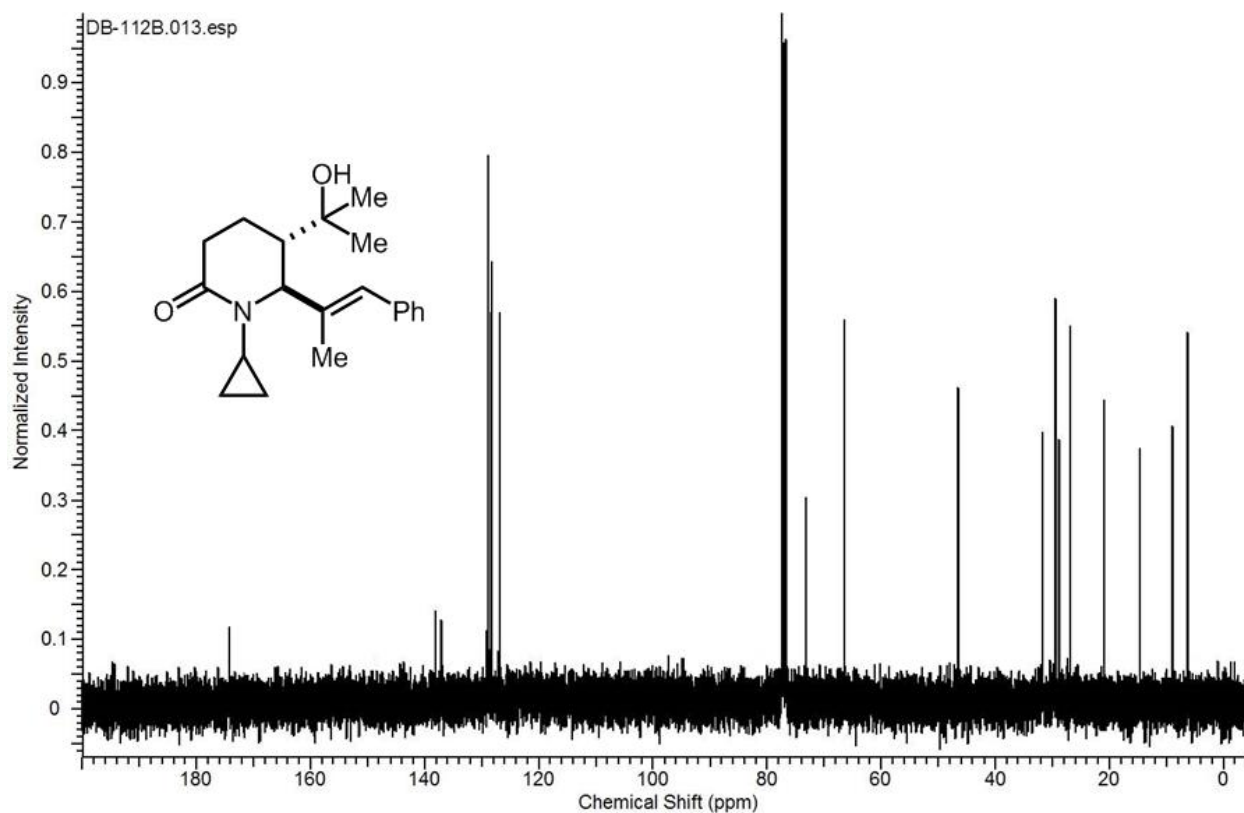

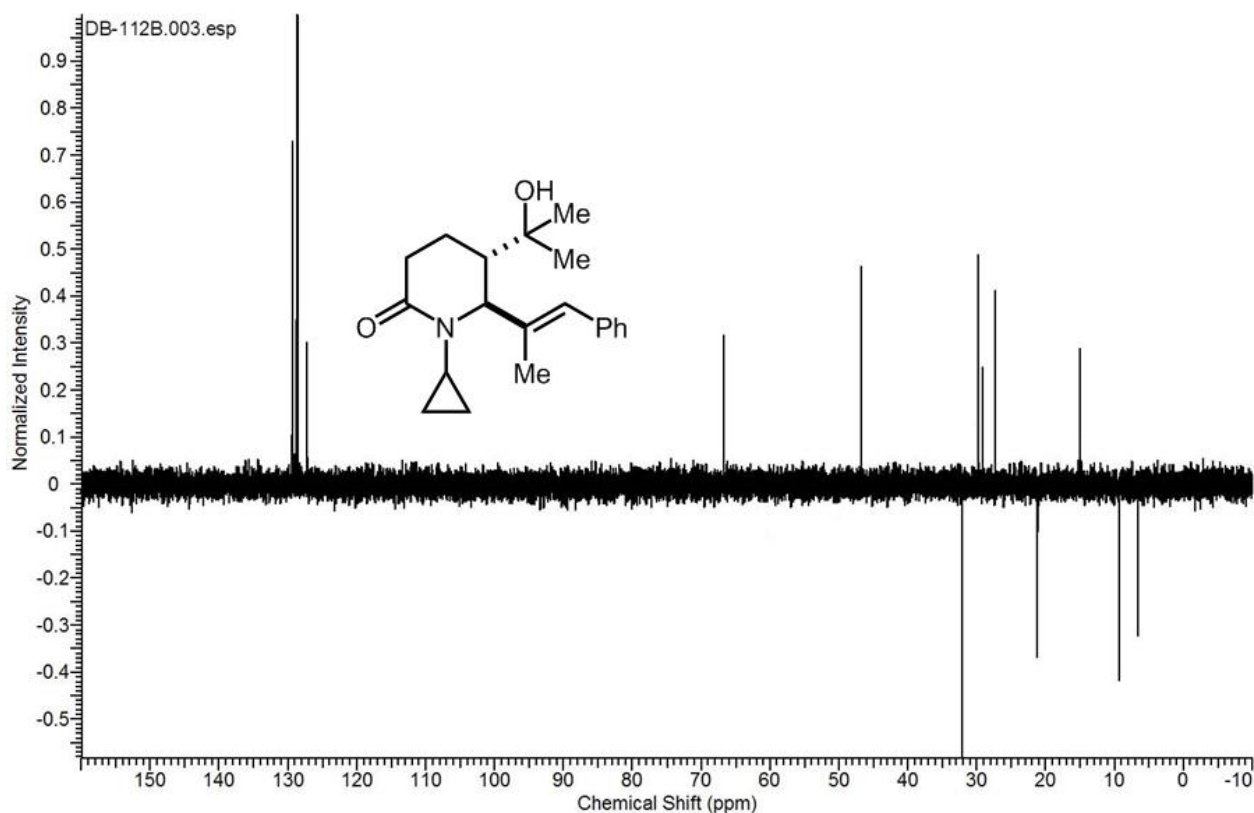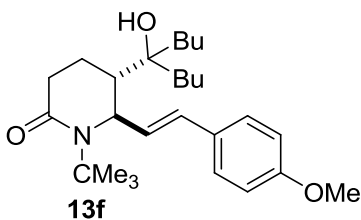

Prepared from the corresponding ester (0.5 mmol) using General Procedure D. Yield = 204 mg, 95%.  $^1\text{H}$  NMR (400 MHz,  $\text{CDCl}_3$ )  $\delta$  7.29 to 7.26 (2H, d), 6.86 to 6.83 (2H, d), 6.36 to 6.29 (1H, d), 5.99 to 5.95 (1H, dd), 4.75 to 4.73 (1H, dd), 3.76 (3H, s), 2.39 to 2.30 (2H, m), 2.07 to 2.02 (1H, m), 1.90 to 1.80 (1H, m), 1.64 to 1.25 (22H, m), 0.98 to 0.90 (6H, t).  $^{13}\text{C}$  NMR (101 MHz,  $\text{CDCl}_3$ )  $\delta$  174.60, 159.26, 132.81, 129.36, 127.86, 127.43, 114.12, 76.56, 57.75, 55.40, 54.76, 48.31, 36.88, 35.71, 34.36, 28.73, 25.62, 25.45, 23.51, 23.42, 21.37, 14.21. **HRMS- $\text{EI}^+$**  ( $m/z$ ): calc'd for  $\text{C}_{27}\text{H}_{43}\text{NO}_3$  429.3243; found 429.3248.

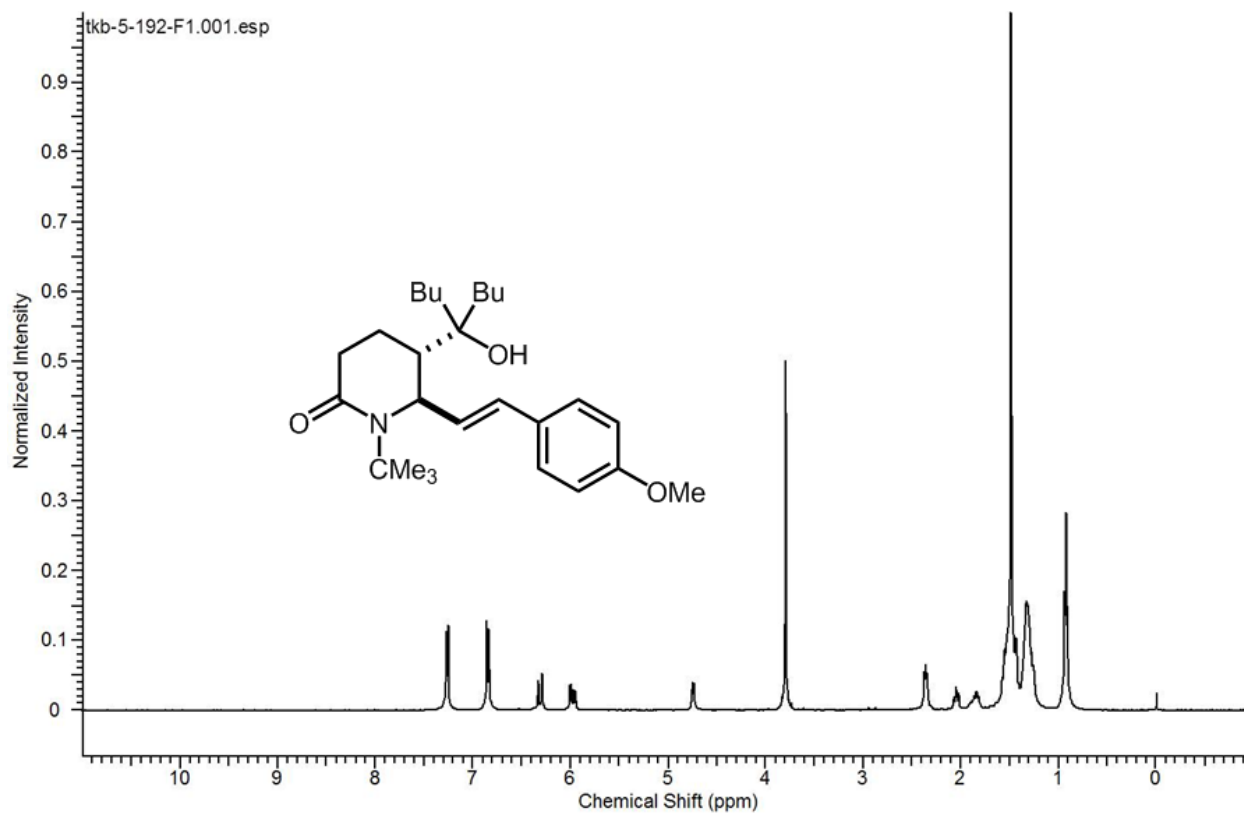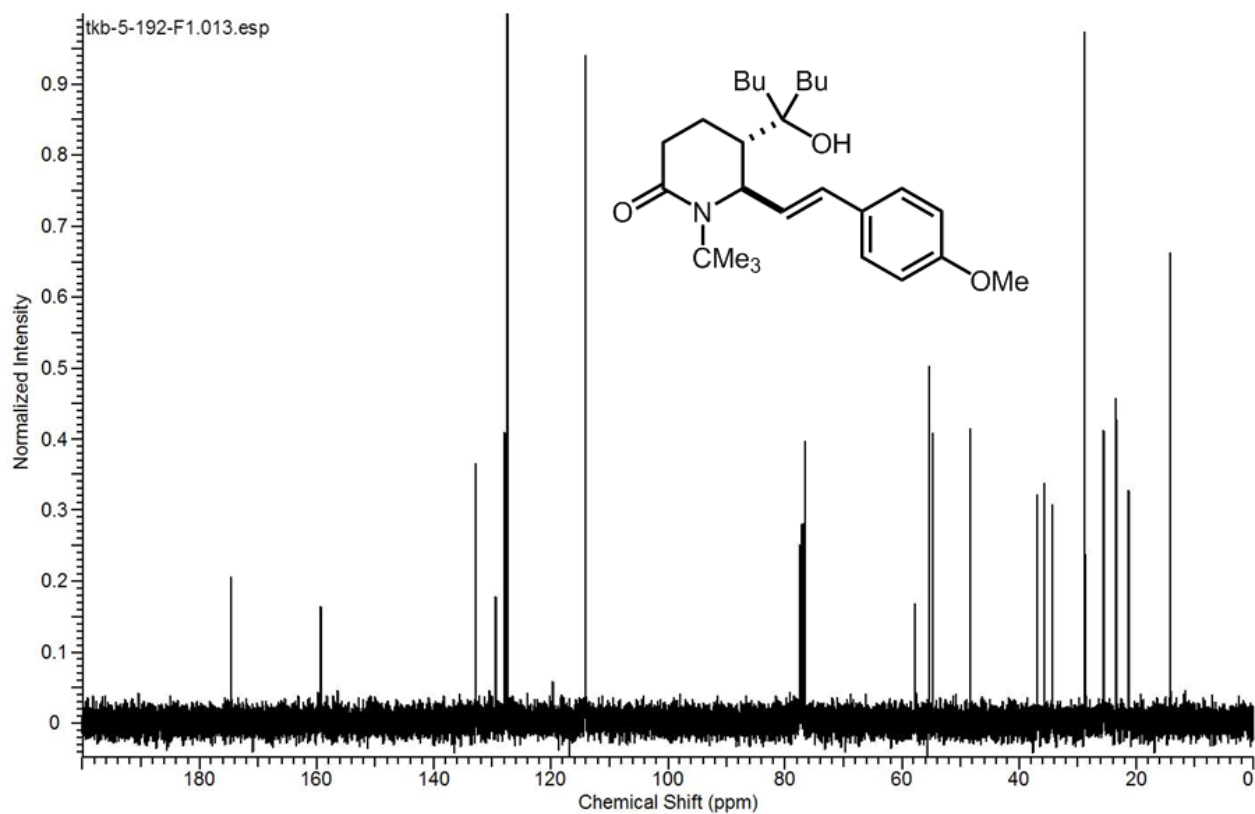

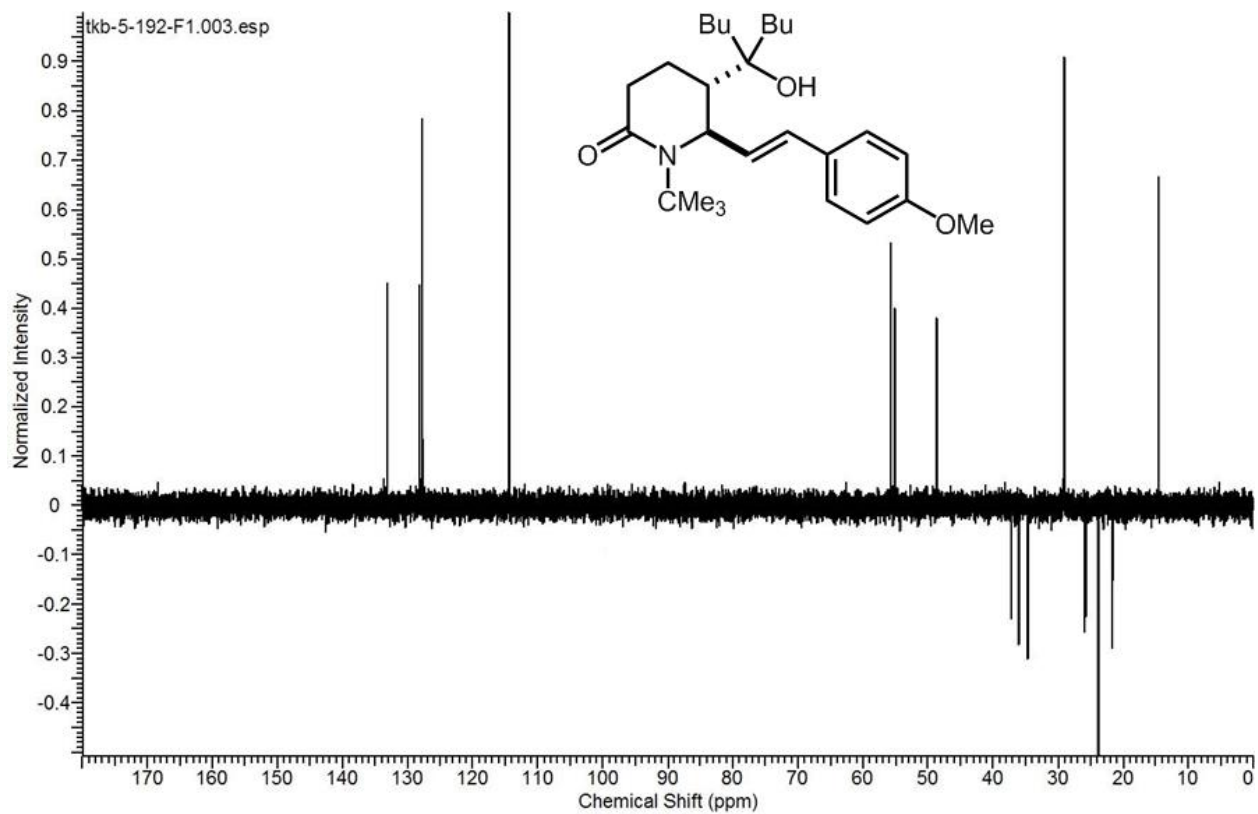

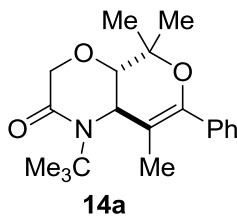

Prepared from ester **5o2** (0.50 mmol) using General Procedures D and G. Yield = 149 mg, 79%.

$^1\text{H}$  NMR (400 MHz,  $\text{CDCl}_3$ )  $\delta$  7.37 to 7.22 (5H, m), 4.53 (1H, d), 4.31 to 4.11 (2H, dd), 3.51 (1H, d), 1.88 (3H, s), 1.54 to 1.30 (15H, m).  $^{13}\text{C}$  NMR (101 MHz,  $\text{CDCl}_3$ )  $\delta$  170.7, 138.4, 137.0, 128.9, 128.5, 128.4, 128.3, 127.0, 81.5, 77.4, 77.3, 77.1, 76.8, 73.4, 67.4, 59.1, 58.5, 30.4, 29.8, 28.2, 27.8, 27.2, 26.3, 15.2. **HRMS- $\text{EI}^+$**  ( $m/z$ ): calc'd for  $\text{C}_{20}\text{H}_{27}\text{NO}_3$  329.1991; found 329.1996.

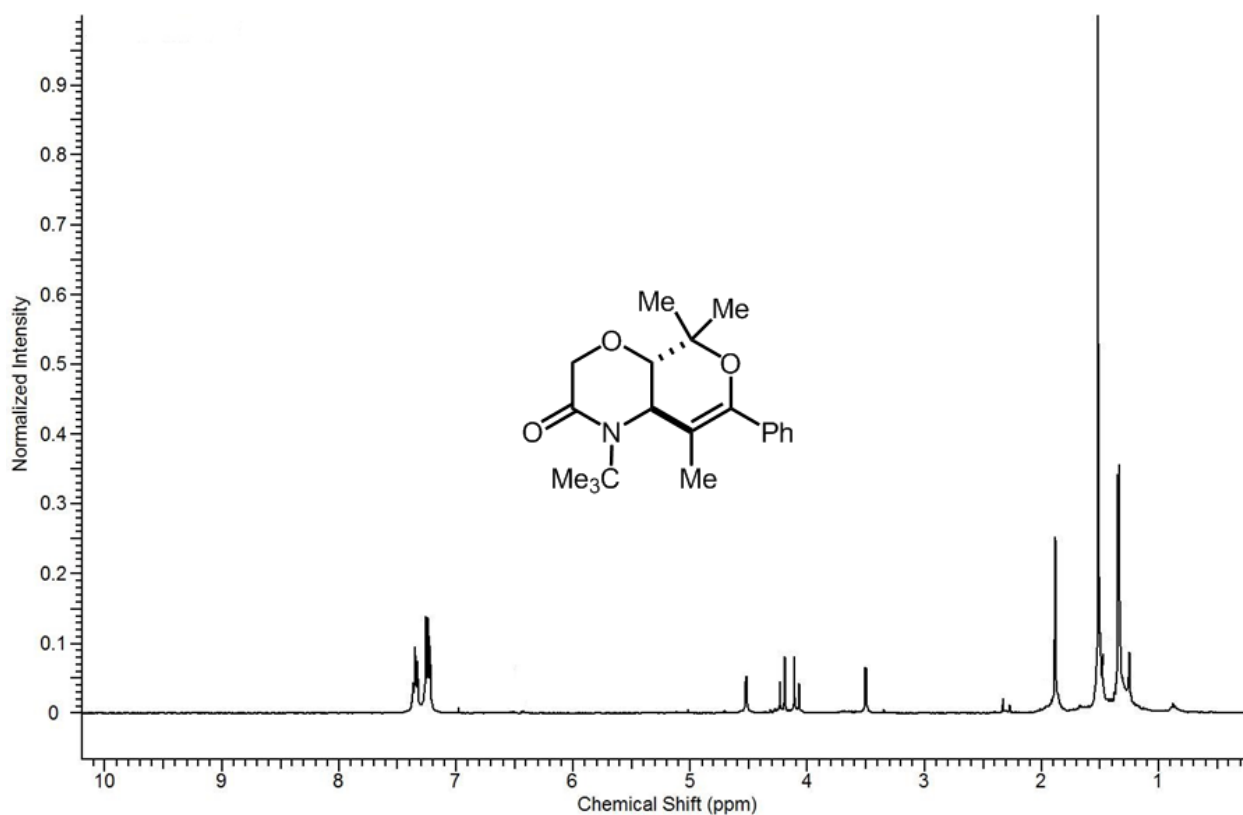



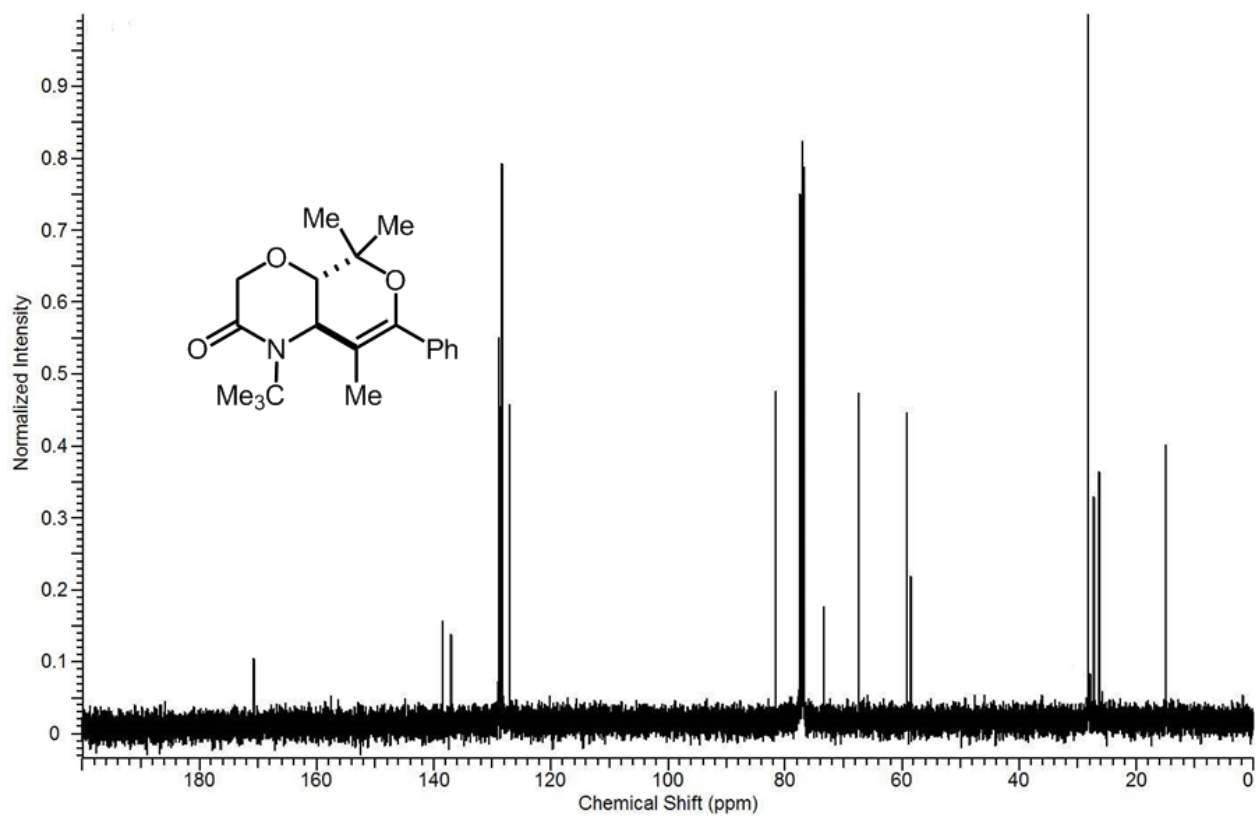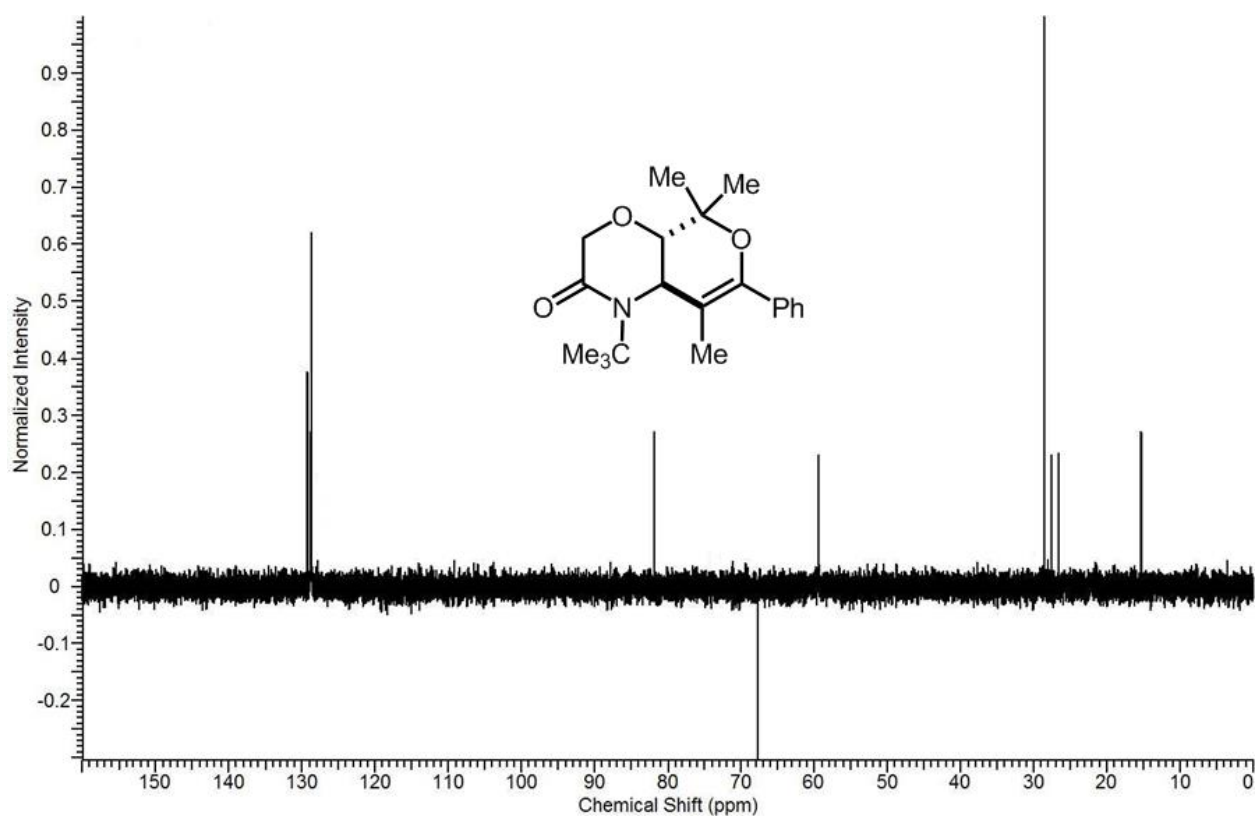

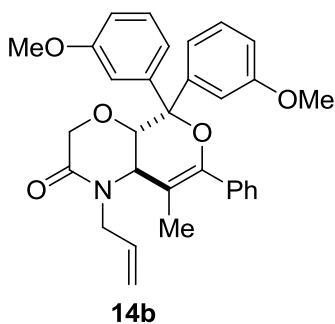

Prepared from ester **5k2** (0.50 mmol) using General Procedures D and G. Yield = 206 mg, 83%.

$^1\text{H}$  NMR (400 MHz,  $\text{CDCl}_3$ )  $\delta$  7.36 to 6.81 (13H, m), 5.78 to 5.71 (1H, m), 5.26 to 5.15 (2H, dd), 4.75 to 4.70 (1H, d), 4.62 to 4.58 (1H, dd), 4.44 to 4.10 (3H, m), 3.79 to 3.71 (6H, s,s), 3.33 to 3.00 (2H, m), 1.78 (3H, s).  $^{13}\text{C}$  NMR (101 MHz,  $\text{CDCl}_3$ )  $\delta$  168.81, 160.93, 159.59, 146.92, 143.95, 136.56, 132.68, 132.44, 130.06, 129.58, 129.49, 129.42, 129.36, 129.30, 129.24, 129.14, 129.03, 128.91, 128.53, 128.45, 128.21, 127.98, 126.94, 126.62, 126.15, 118.98, 118.53, 113.06, 112.01, 79.66, 78.03, 66.97, 63.15, 55.27, 55.10, 45.1, 14.1. **HRMS- $\text{EI}^+$**  ( $m/z$ ): calc'd for  $\text{C}_{31}\text{H}_{31}\text{NO}_5$  497.2202; found 497.2209.

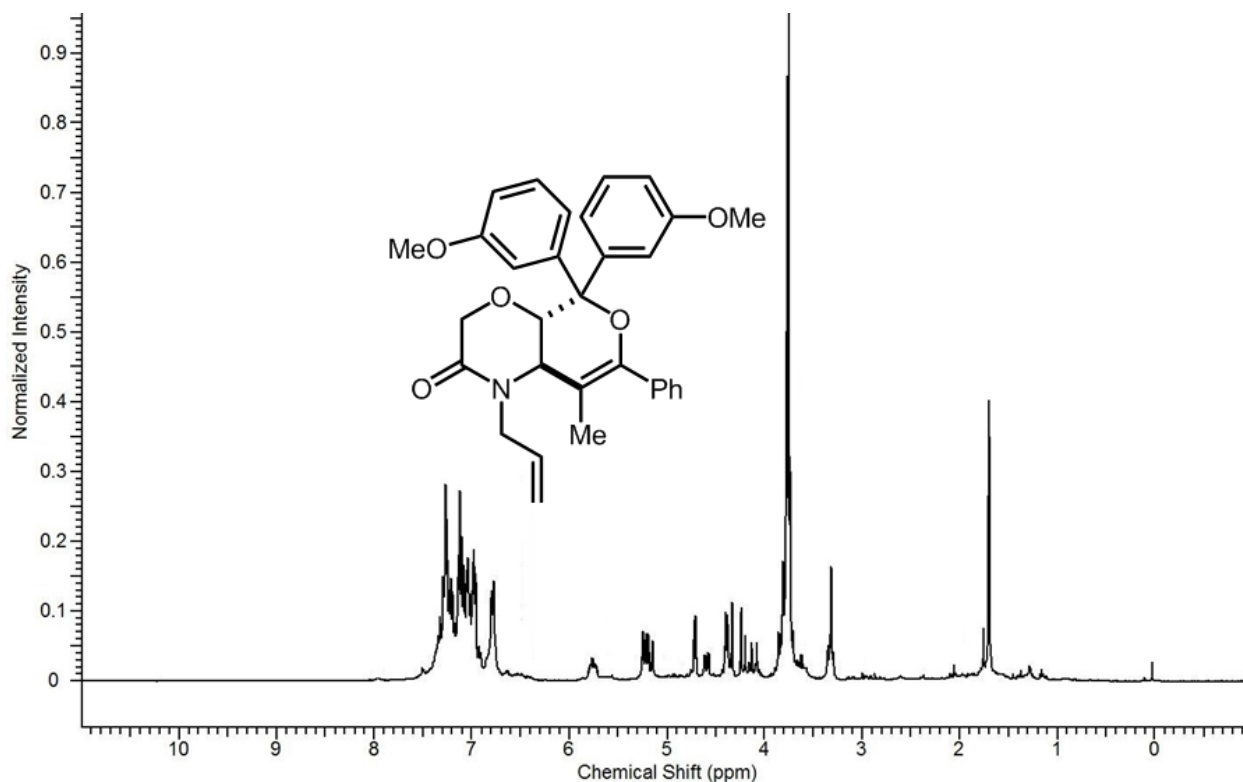

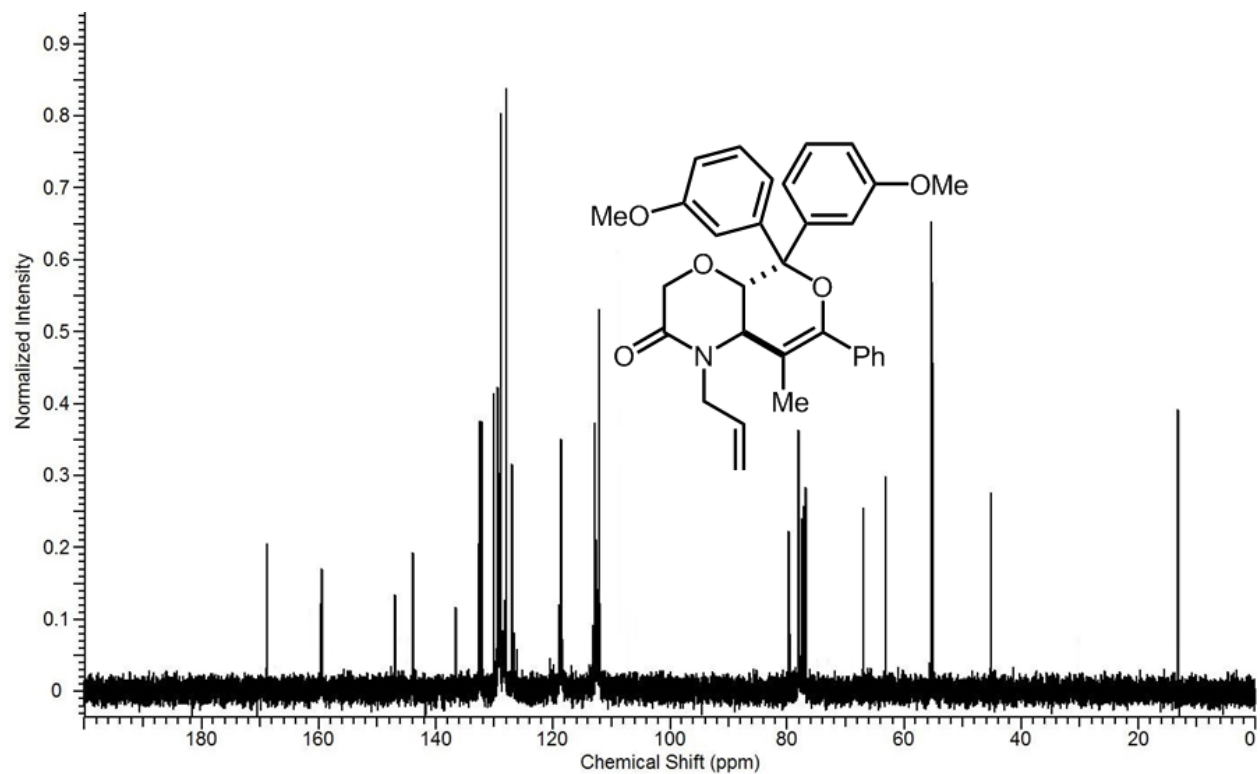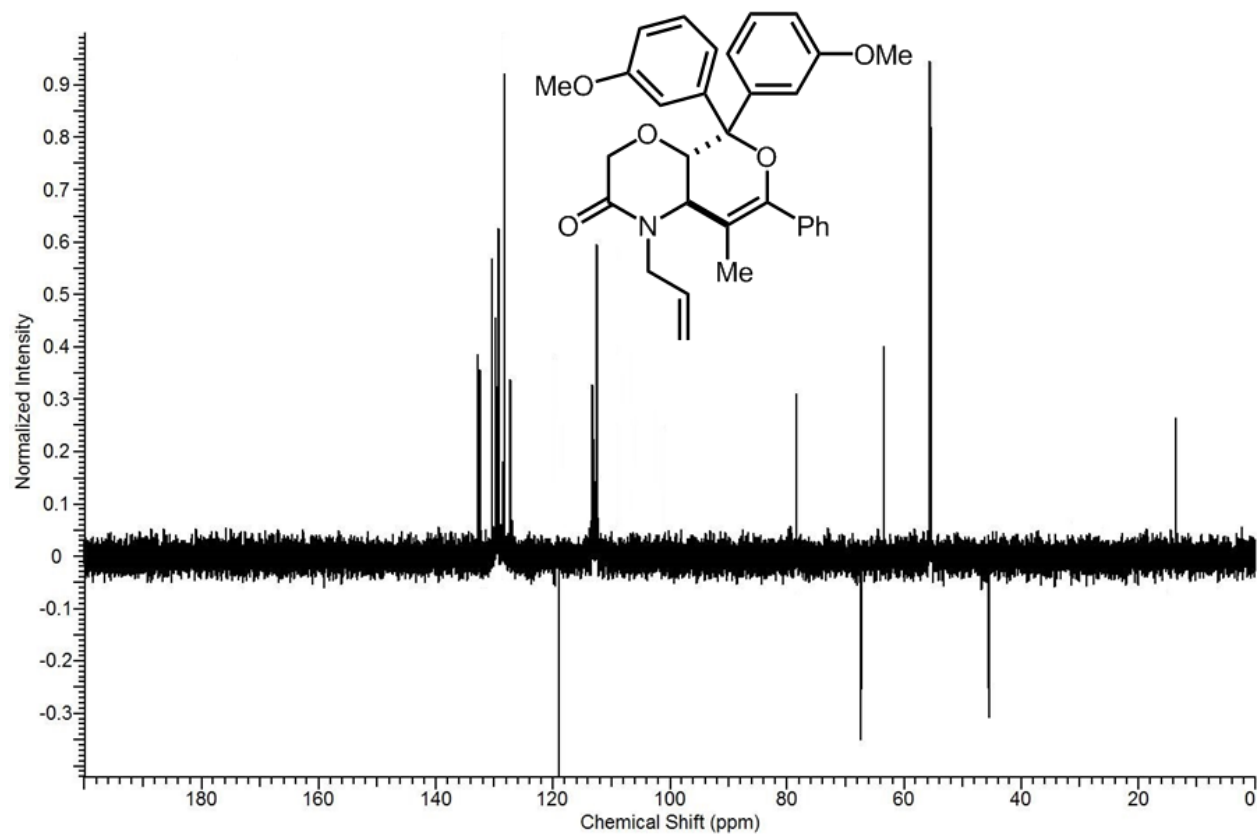

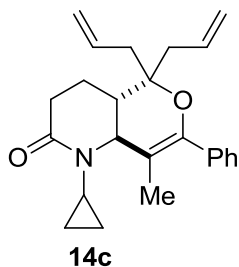

Prepared from ester **7n2** (0.50 mmol) using General Procedures D and G. Yield = 156 mg, 86%.  $^1\text{H}$  NMR (400 MHz,  $\text{CDCl}_3$ )  $\delta$  7.49 to 7.18 (5H, m), 5.92 to 5.72 (2H, m), 5.30 to 4.92 (4H, m), 4.30 to 4.27 (1H, br s), 2.59 to 0.60 (17H, m).  $^{13}\text{C}$  NMR (101 MHz,  $\text{CDCl}_3$ )  $\delta$  174.52, 138.08, 137.16, 133.16, 133.14, 129.08, 128.97, 128.87, 128.28, 128.16, 126.82, 125.57, 119.68, 75.56, 65.51, 41.33, 40.90, 31.82, 30.38, 29.76, 20.06, 14.74, 8.89, 6.18. **HRMS- $\text{EI}^+$**  ( $m/z$ ): calc'd for  $\text{C}_{24}\text{H}_{29}\text{NO}_2$  363.2198; found 363.2202.

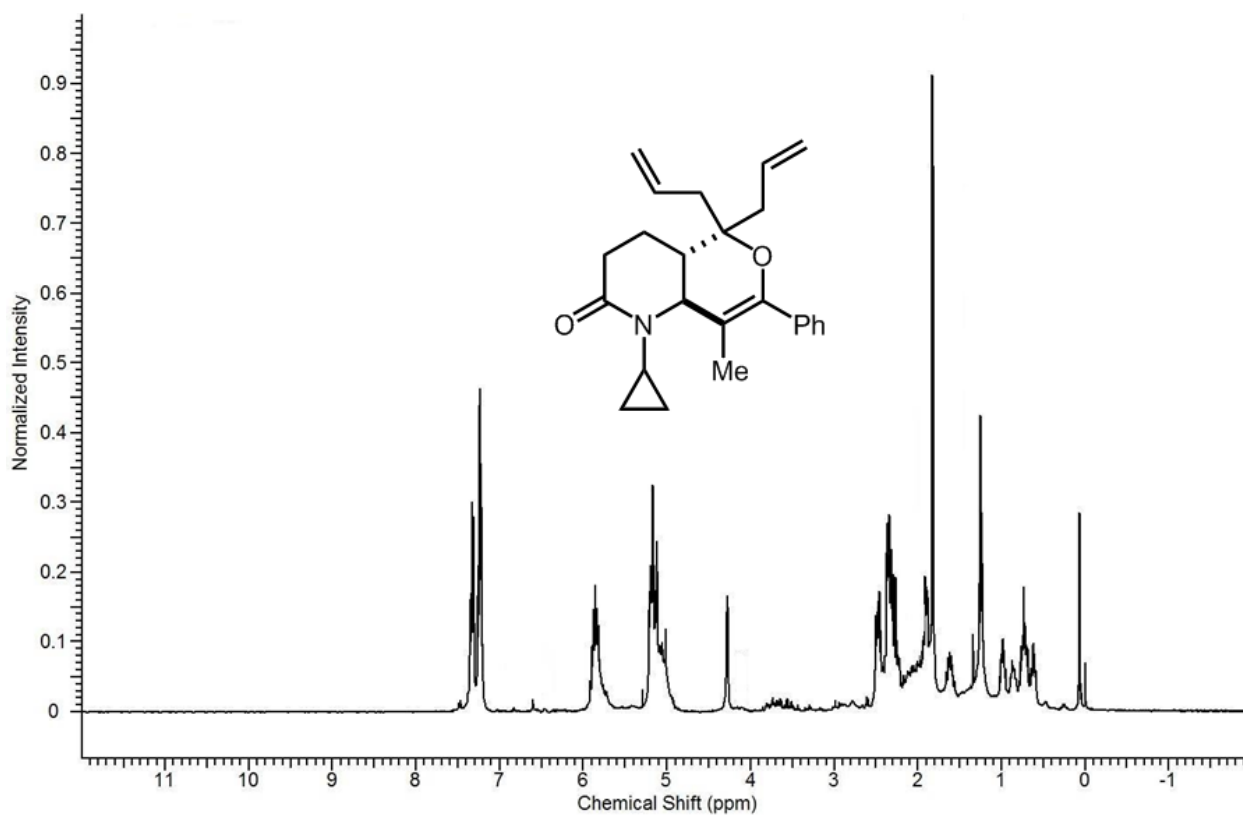

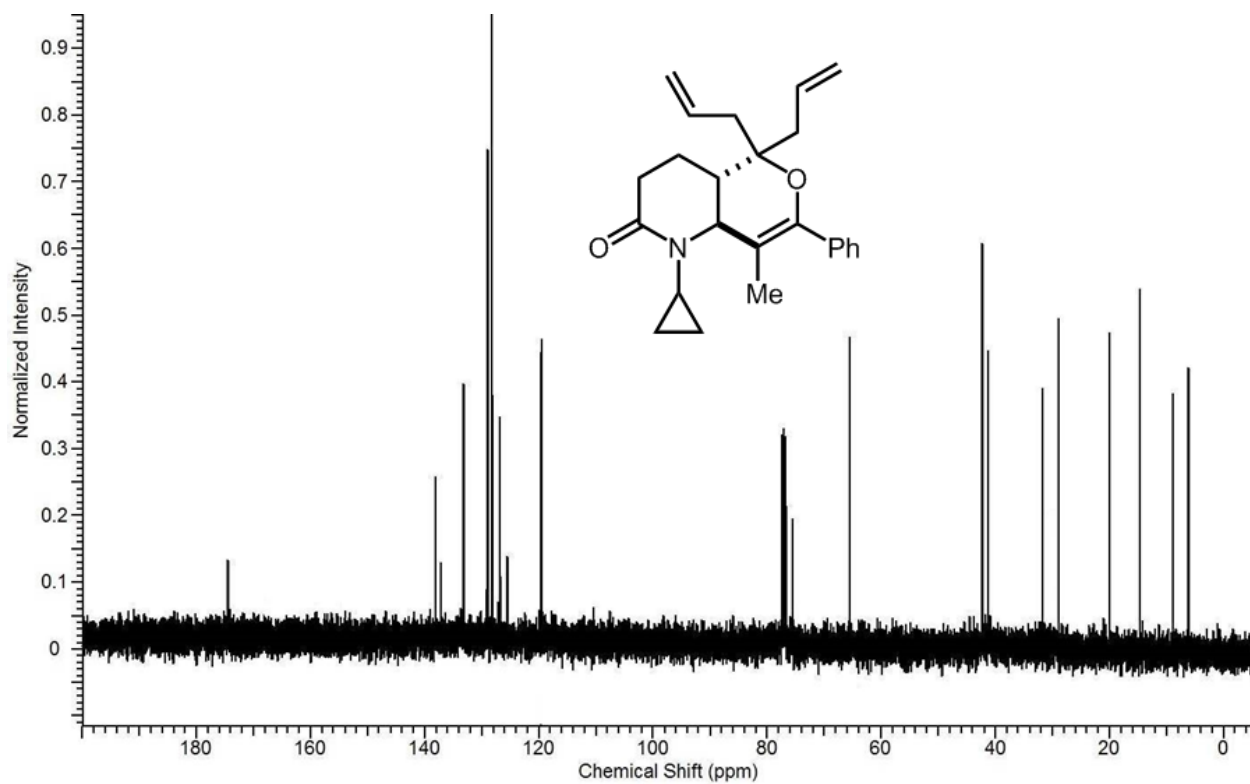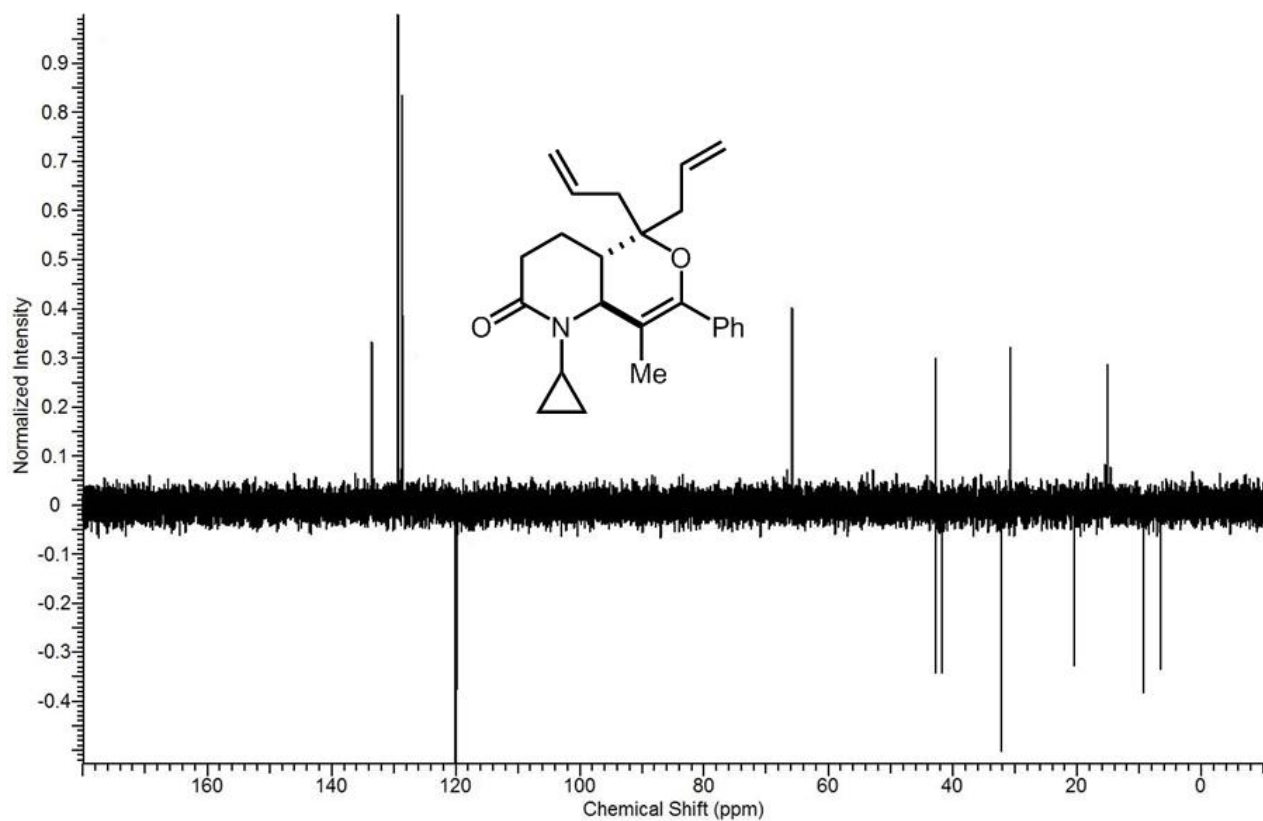

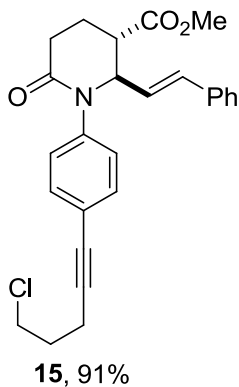

To an oven-dried, septum-capped 2-neck-round bottom flask equipped with a stir bar, was added aryl iodide **7d2** (461 mg, 1 mmol, 1.0 equiv) in DMF/Et<sub>3</sub>N (5:1 mL) and 5-chloro-1-pentyne (0.212 mL, 2 mmol, 2 equiv), under nitrogen atmosphere. After completely degassing the flask, PdCl<sub>2</sub>(PPh<sub>3</sub>)<sub>2</sub> (35 mg, 5 mol%) and CuI (10 mg, 5 mol%) were added rapidly and concurrently. The mixture was then stirred at room temperature for 22 h (as indicated by TLC and GC-MS). Upon completion, the mixture was concentrated under reduced pressure and directly subjected to flash chromatography on silica eluting with hexane/EtOAc. Yield = 396 mg, 91%. <sup>1</sup>H NMR (400 MHz, CDCl<sub>3</sub>) δ 7.40 to 7.16 (9H, m), 6.41 to 6.37 (1H, d), 6.18 to 6.06 (1H, dd), 4.89 to 4.86 (1H, dd), 3.78 to 3.63 (5H, m), 2.93 to 2.86 (2H, m), 2.65 to 2.51 (4H, m), 2.34 to 2.18 (2H, m), 2.03 to 1.97 (2H, m). <sup>13</sup>C NMR (101 MHz, CDCl<sub>3</sub>) δ 172.4, 169.2, 141.3, 135.7, 134.9, 133.4, 132.3, 128.7, 128.4, 127.5, 127.3, 126.7, 124.3, 122.5, 88.7, 81.1, 63.6, 52.5, 44.7, 43.8, 31.4, 29.7, 21.1, 16.9. **HRMS-ESI<sup>+</sup>** (*m/z*): calc'd for C<sub>26</sub>H<sub>26</sub>ClNO<sub>3</sub> 435.1601; found 435.1609.

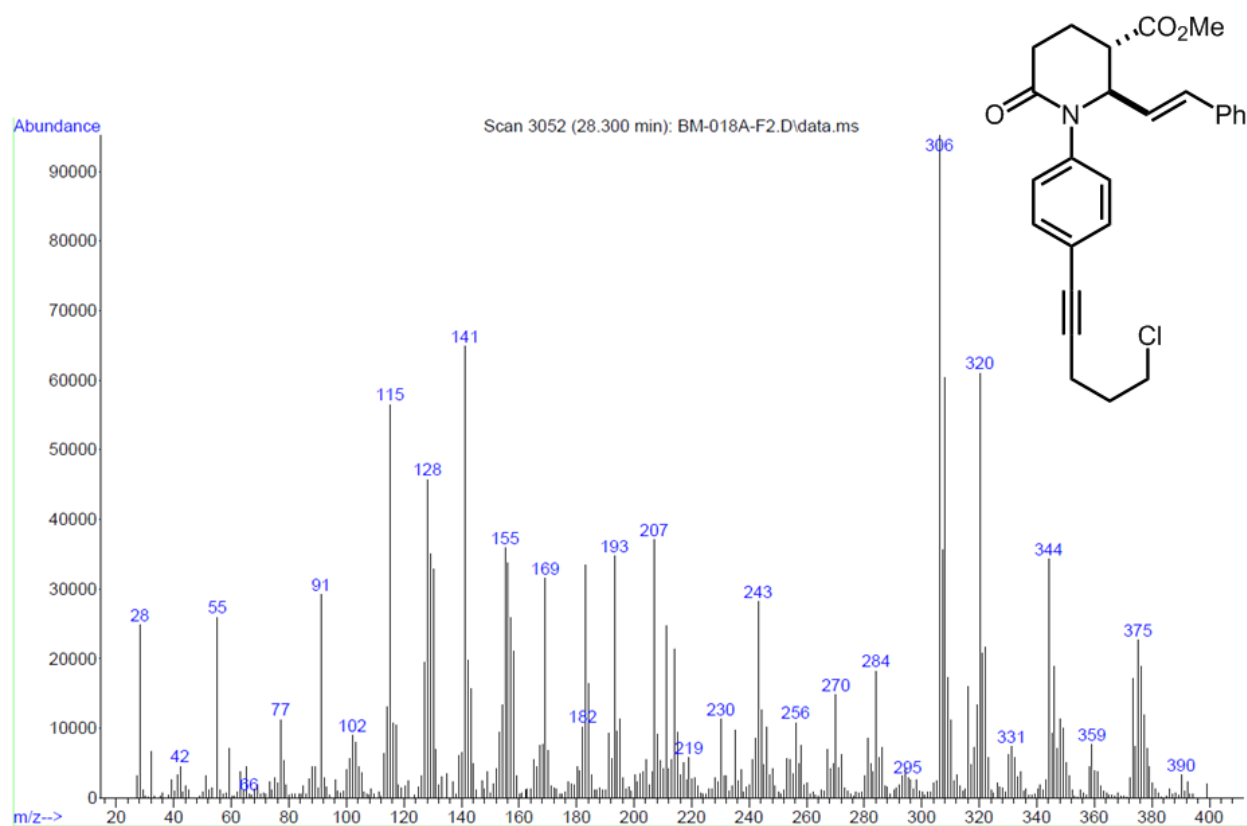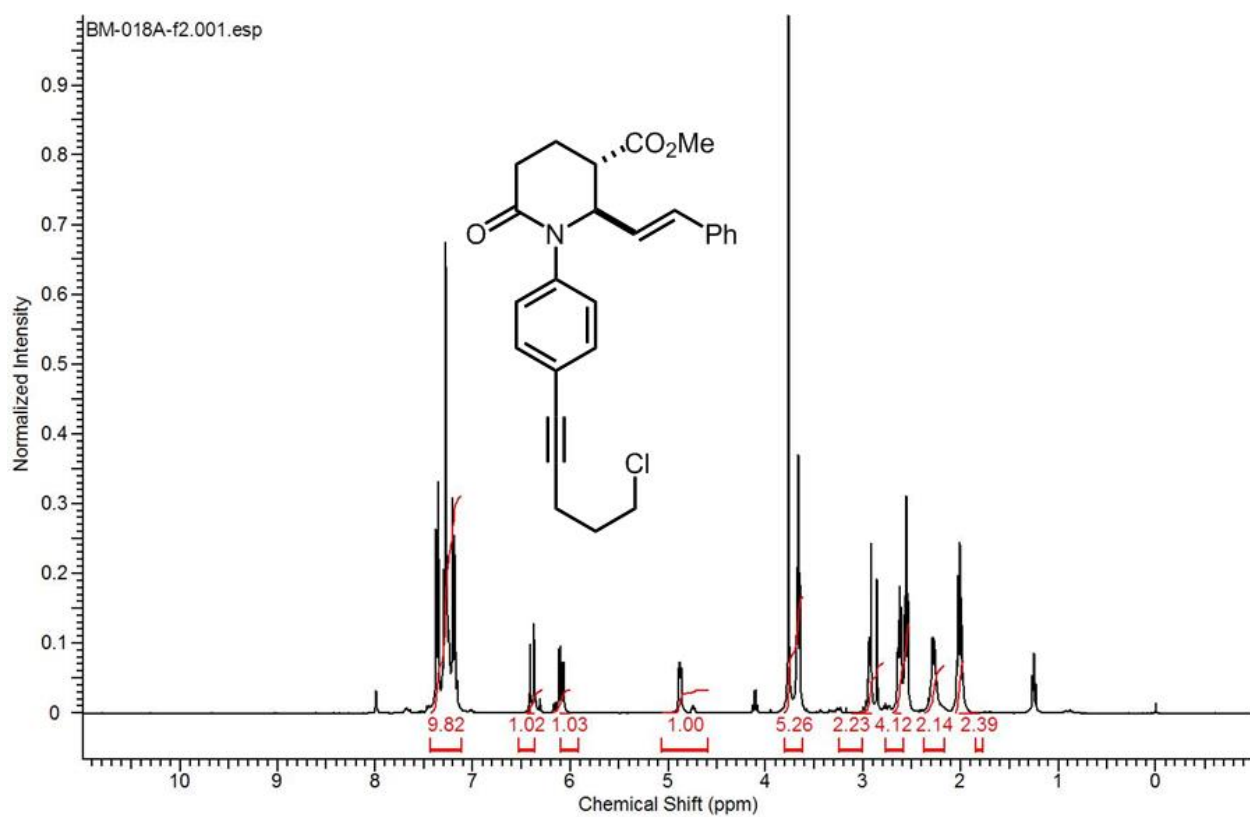

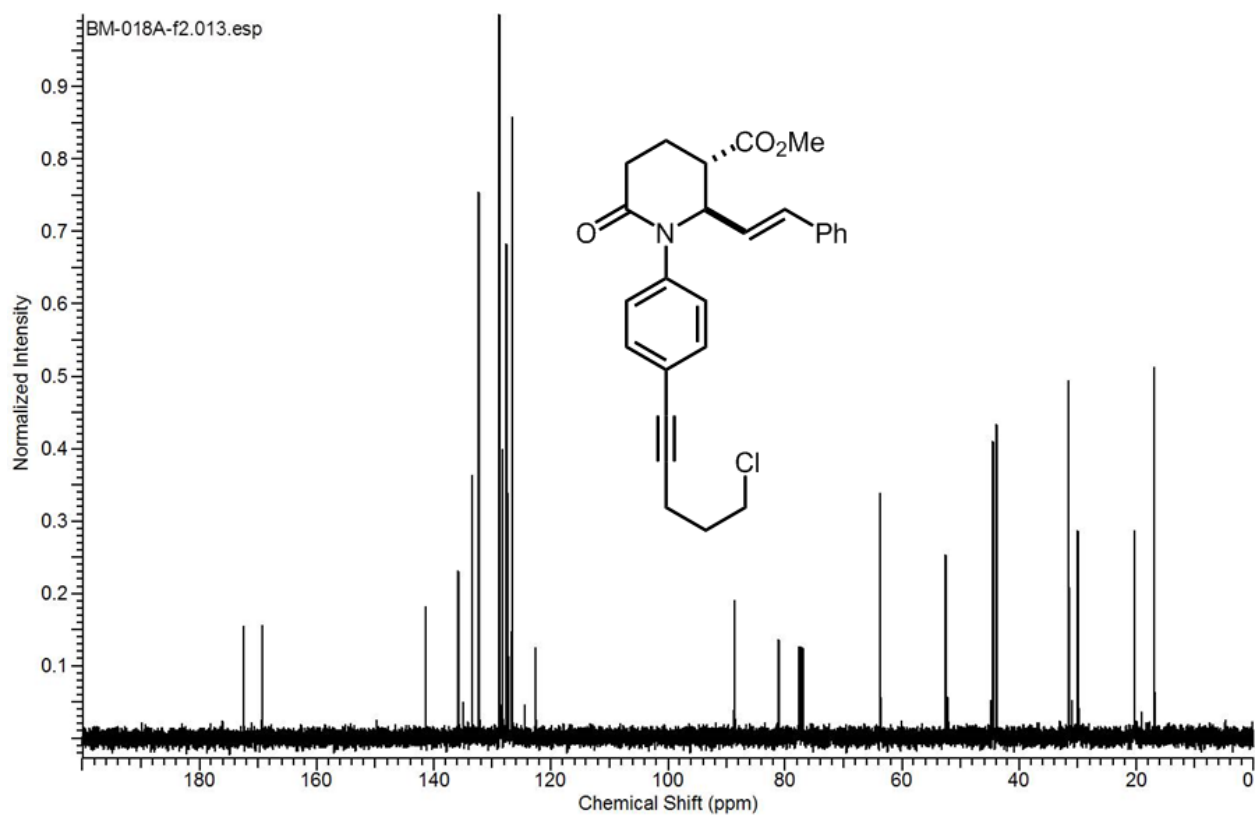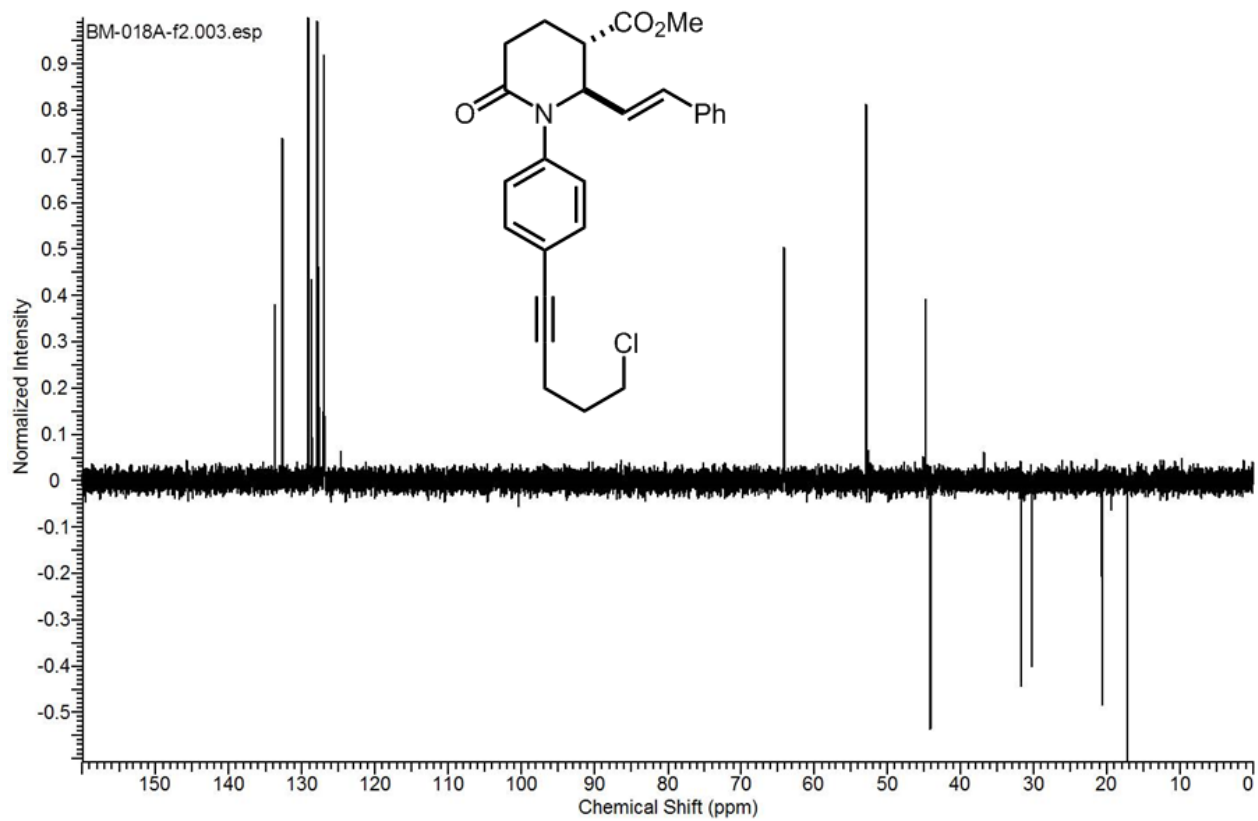



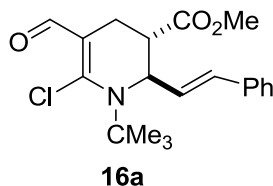

Prepared from lactam **7o2** (1.0 mmol) using General Procedure H. Yield = 296 mg, 82%.  $^1\text{H}$  NMR (400 MHz,  $\text{CDCl}_3$ )  $\delta$  9.89 (1H, s), 7.34 to 7.23 (5H, m), 6.47 to 6.44 (1H, d), 6.04 to 5.98 (1H, dd), 5.17 to 5.07 (1H, dd), 3.78 (3H, s), 2.90 to 2.87 (2H, m), 2.46 to 2.34 (1H, m), 1.56 (9H, s).  $^{13}\text{C}$  NMR (101 MHz,  $\text{CDCl}_3$ )  $\delta$  189.08, 172.46, 150.04, 135.82, 134.20, 132.19, 128.96, 127.14, 126.67, 124.59, 110.54, 61.75, 59.26, 52.29, 43.59, 34.84, 31.64 21.08. **HRMS- $\text{EI}^+$**  ( $m/z$ ): calc'd for  $\text{C}_{20}\text{H}_{24}\text{ClNO}_3$  361.1145; found 361.1149.

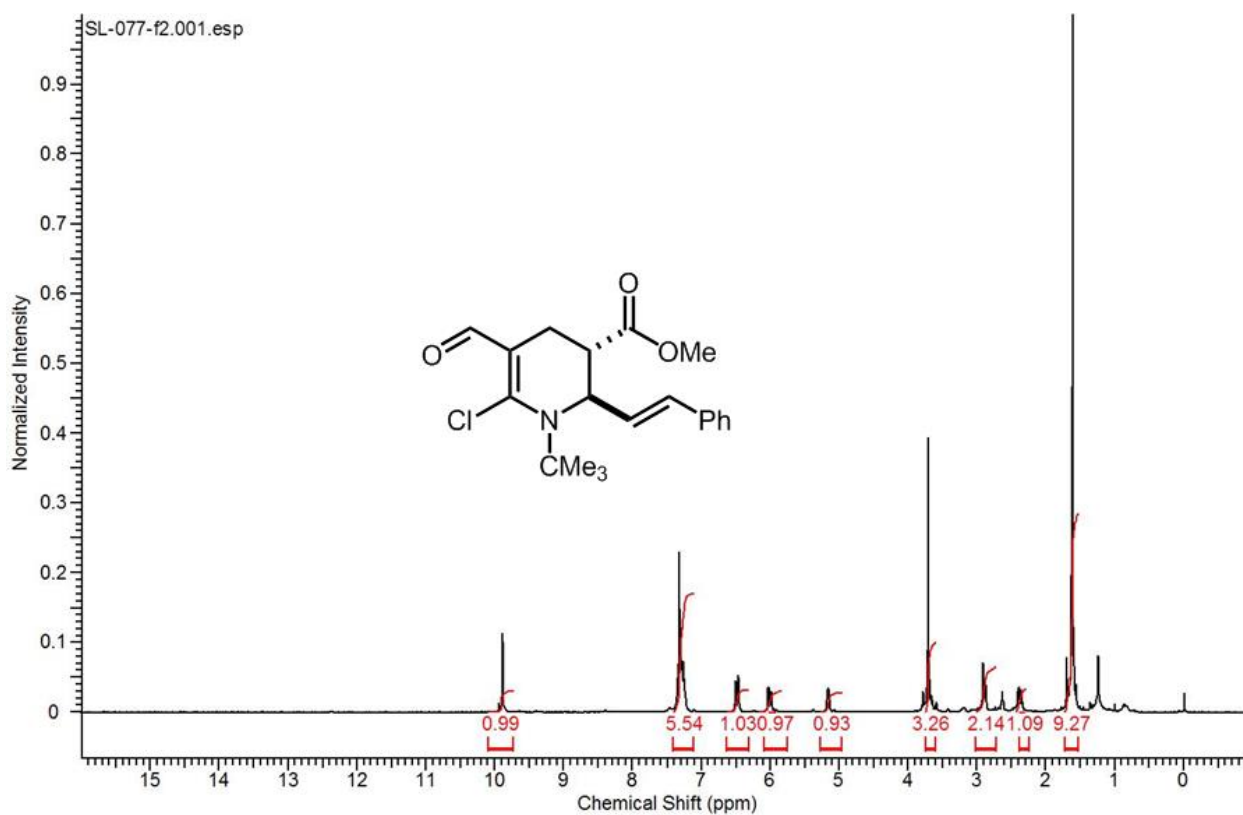

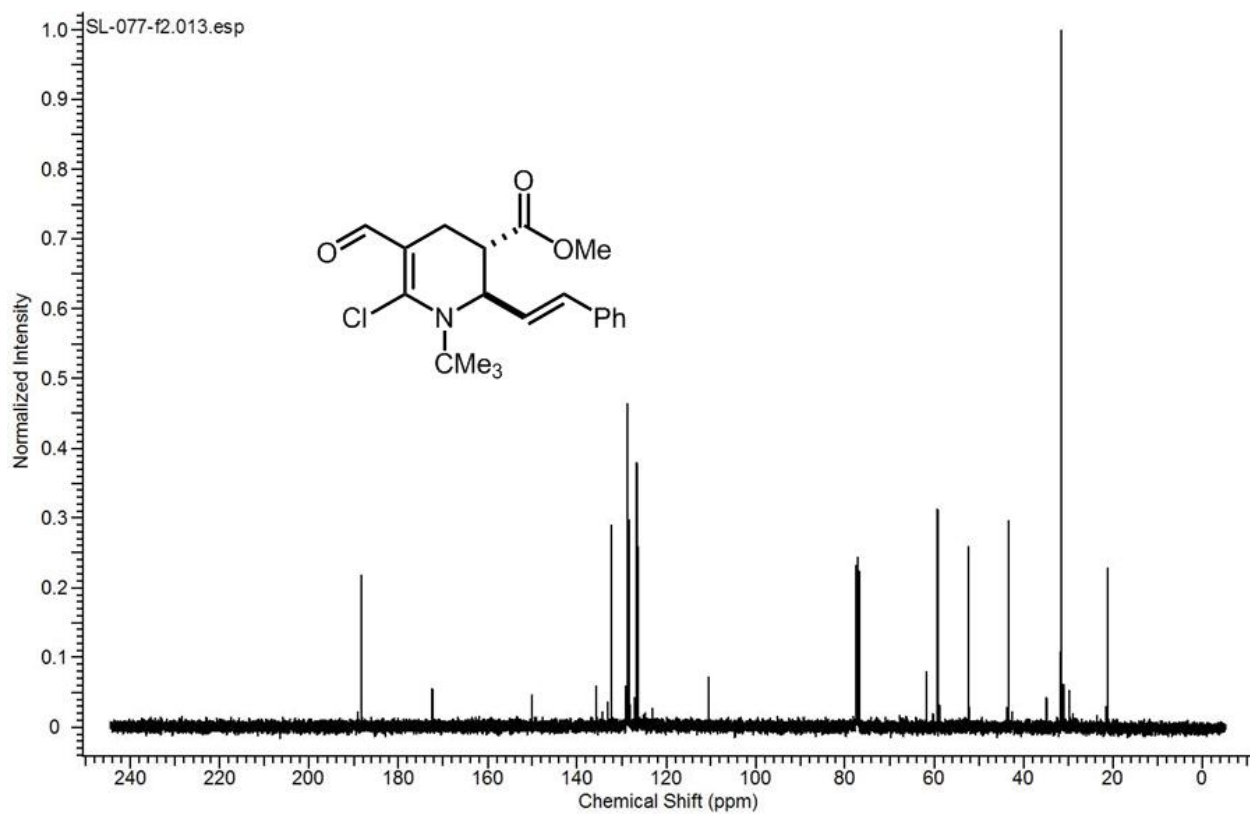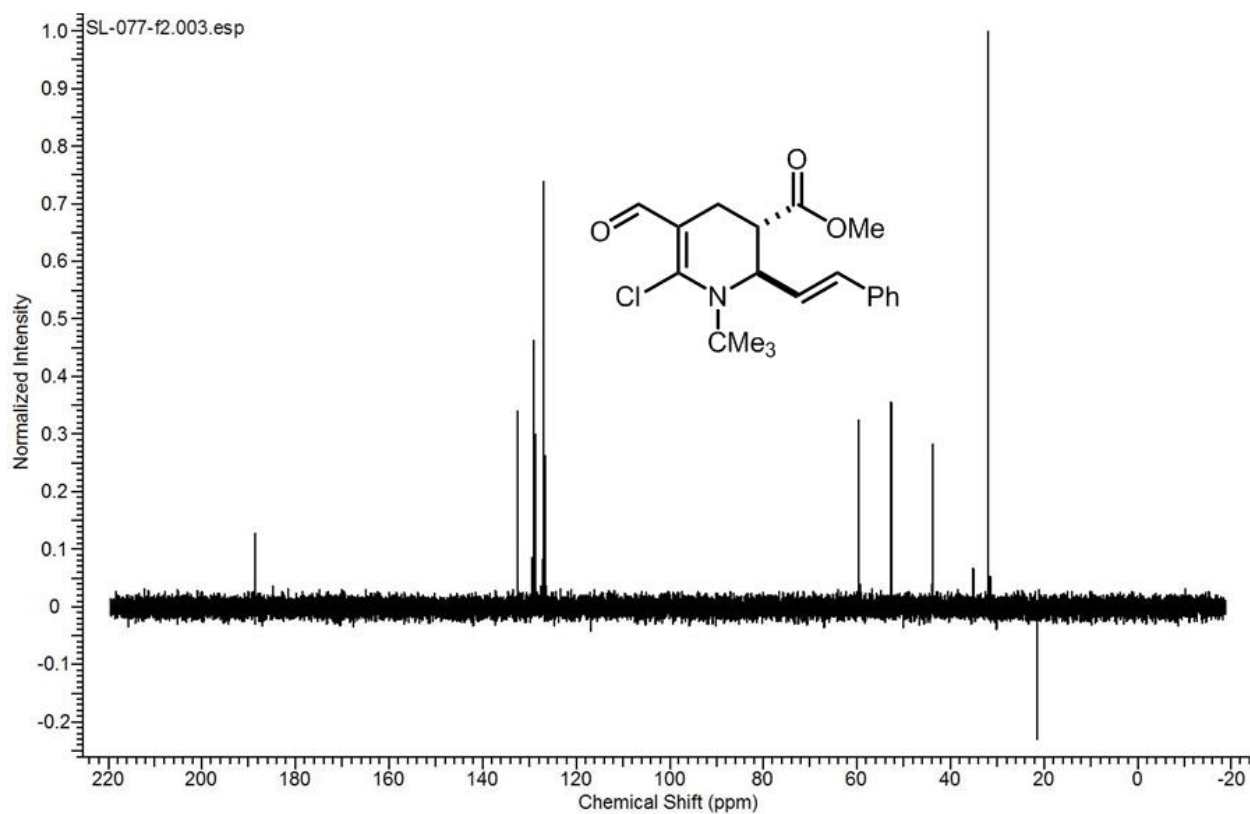

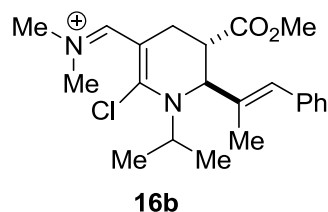

Prepared from lactam **7q2** (1.0 mmol) using General Procedure H, but hydrolysis was carried out for only 20 min and no basification was necessary. Yield = 342 mg, 88%.  $^1\text{H}$  NMR (400 MHz,  $\text{CDCl}_3$ )  $\delta$  8.24 (1H, s), 7.38 to 7.21 (5H, m), 6.06 (1H, s), 4.98 to 4.90 (1H, m), 4.70 to 4.66 (1H, d), 3.76 to 3.61 (9H, m), 3.28 to 3.16 (2H, m), 2.86 to 2.80 (1H, dd), 1.88 (3H, s), 1.38 to 1.25 (6H, m).  $^{13}\text{C}$  NMR (101 MHz,  $\text{CDCl}_3$ )  $\delta$  170.70, 162.33, 157.46, 136.10, 135.47, 128.92, 128.10, 127.95, 127.42, 97.17, 62.27, 58.36, 56.65, 52.78, 41.94, 38.16, 23.18, 21.38, 20.09, 16.70. **HRMS-EI** $^+$  ( $m/z$ ): calc'd for  $\text{C}_{22}\text{H}_{30}\text{Cl}_2\text{N}_2\text{O}_2^+$  381.1990; found 381.1994.

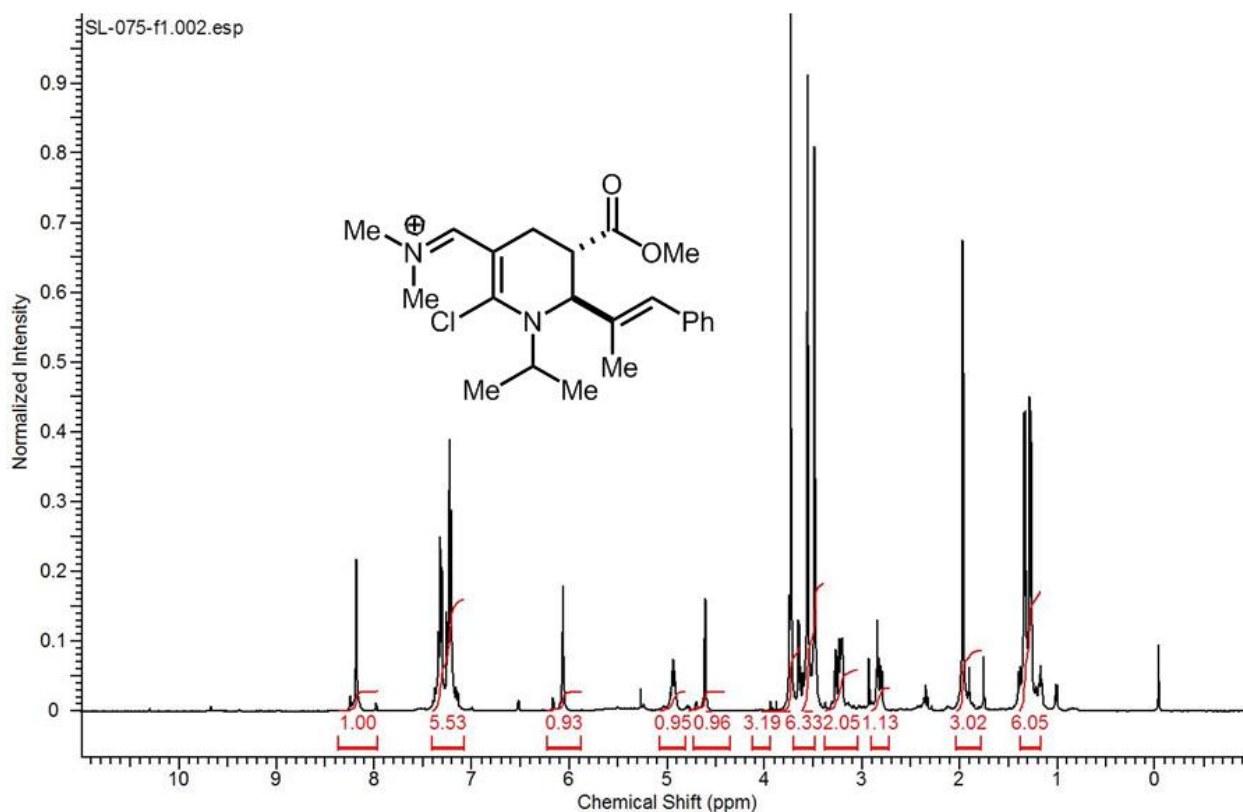

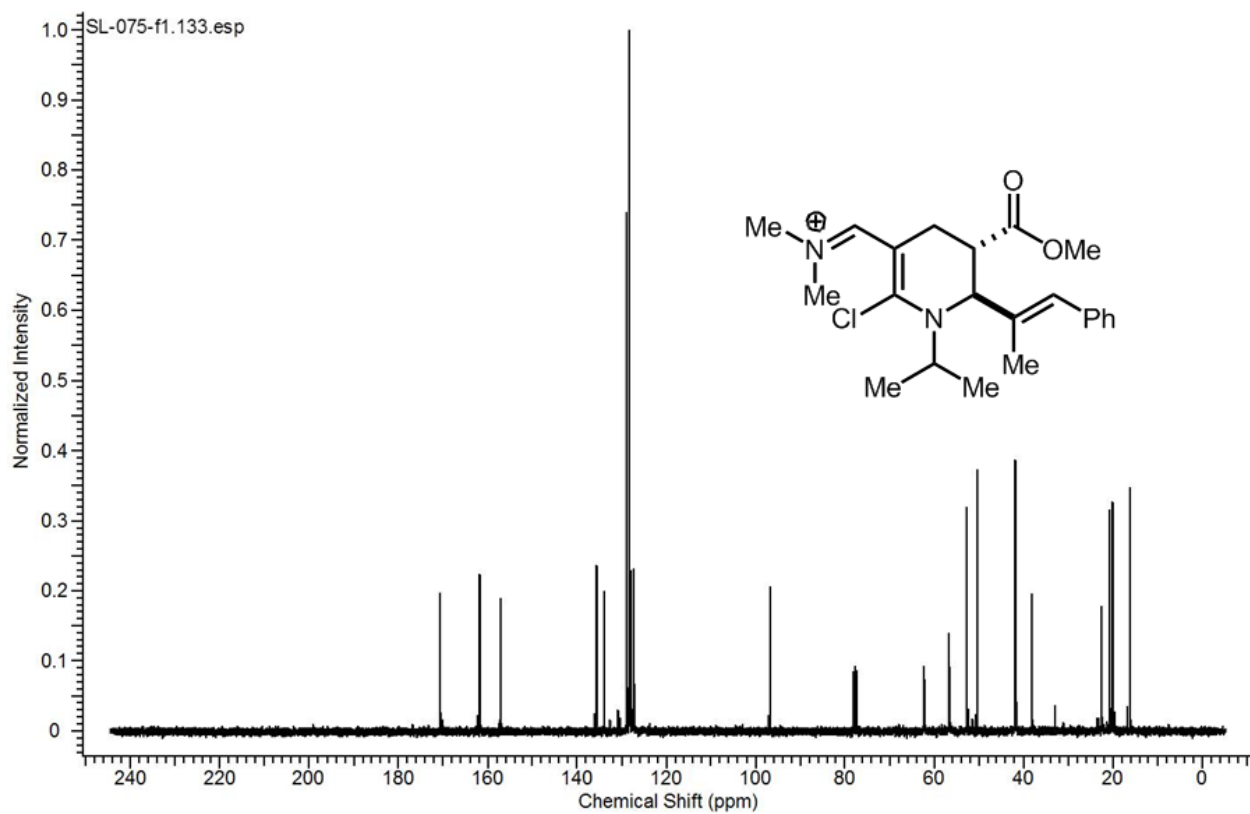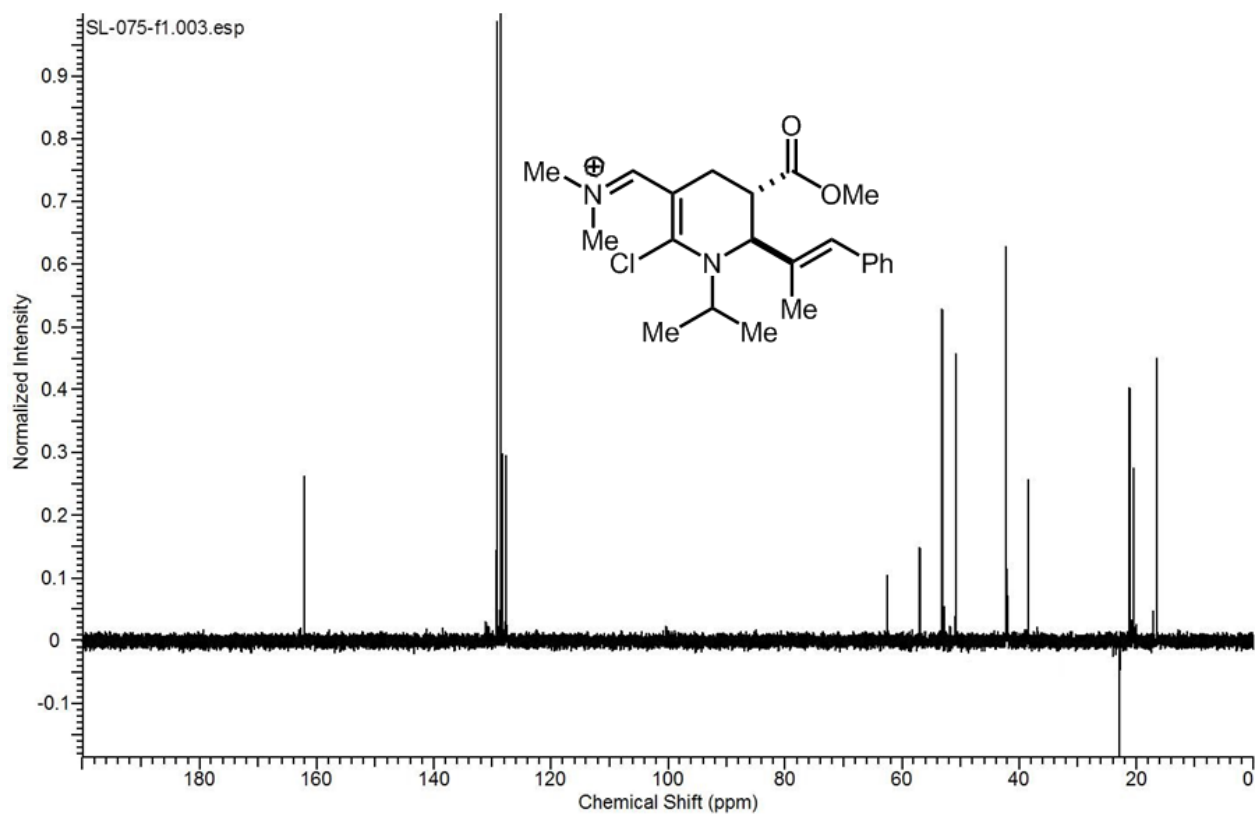

**References**

- (1) Dar'in, D.; Bakulina, O.; Chizhova, M.; Krasavin, M. *Org. Lett.* **2015**, *17*, 3930.
- (2) Beng, T. K.; Bassler, D. P. *Tetrahedron Lett.* **2014**, *55*, 6662.
- (3) Beng, T. K.; Wilkerson-Hill, S. M.; Sarpong, R. *Org. Lett.* **2014**, *16*, 916.
